# Supplementary material for: Phosphatidylcholines from Pieris brassicae eggs activate an immune response in Arabidopsis
Source: eLife. 2020 Sep 28;9:e60293. doi: 10.7554/eLife.60293 (PMC7521926; doi:10.7554/eLife.60293)
Supplement: Figure 1—figure supplement 1—source data 1. [file elife-60293-fig1-figsupp1-data1.xlsx]

## Sheet: Fig. 1-figure supplement 1
RNAseq data can be retrieved in the National Center for Biotechnology Information’s Gene Expression Omnibus (GEO) under the accession number GSE144091.
R script to analyze the data is provided as an acccompanying file.
