# Supplementary material for: Phosphatidylcholines from Pieris brassicae eggs activate an immune response in Arabidopsis
Source: eLife. 2020 Sep 28;9:e60293. doi: 10.7554/eLife.60293 (PMC7521926; doi:10.7554/eLife.60293)
Supplement: Figure 1—source data 1. [file elife-60293-fig1-data1.xlsx]

## Sheet: Fig. 1B
	I	II	III	AV	SE
Ctl	0.206435	5.93271	1.4505	2.52988	1.7389
LF		126.415	94.6394	110.527	15.8876
Fr.1	0.343117	1.05797	3.87341	1.75817	1.07757
Fr.2	0.799168		0.516036	0.657602	0.141566
Fr.3	16.1574	6.43873	4.97135	9.18917	3.50978
Fr.4		58.438	84.713	71.5755	13.1375
Fr.5	0.162277	0.838691	0.913821	0.638263	0.238979

## Sheet: Fig. 1C
								AV
	I	II	III	IV	V	AV	SE	normalized	SE
Fr. 4	70.3228	2.88248				36.6026	33.7202	1
1	3.03219	0.0388683				1.53553	1.49666	0.0419513	0.0408894
2	7.37828	0.217176				3.79773	3.58055	0.103756	0.0978223
3	7.34164	0.0898864				3.71576	3.62588	0.101516	0.0990605
4	1.77269	0.0910885				0.931888	0.8408	0.0254596	0.022971
5	4.19964	0.539931				2.36979	1.82985	0.0647435	0.0499924
6	2.22308	0.203769				1.21342	1.00965	0.0331512	0.0275842
7	7.27739	0.0418011				3.6596	3.6178	0.0999818	0.0988398
8	9.50091	0.133419				4.81716	4.68374	0.131607	0.127962
9	2.82322	0.209985				1.5166	1.30662	0.0414342	0.0356973
10	7.80135	0.102719	4.3972	0.0818942	5.57138	3.59091	1.52939	0.0981052	0.0417837
11	24.1848	0.0911335	33.7995	0.0944319	60.0868	23.6513	11.2713	0.646165	0.307936
12	4.25428	0.251765	0.153848	1.11118	68.3989	14.834	13.4119	0.405271	0.36642
13	0.427478	0.339498	5.09452	37.0315	36.9048	15.9596	8.61978	0.436022	0.235496
14	136.589		15.5513	68.6455		73.5952	35.028	2.01065	0.95698
15	146.498	0.159024	26.8245	0.549395	1.27958	35.062	28.3164	0.95791	0.773616
16	111.665	0.148661	0.240398	9.75904	24.1997	29.2026	21.0786	0.797828	0.575876
17	12.7285		4.49355	8.73078	3.7482	7.42527	2.08056	0.202861	0.0568418
