# Supplementary material for: Phosphatidylcholines from Pieris brassicae eggs activate an immune response in Arabidopsis
Source: eLife. 2020 Sep 28;9:e60293. doi: 10.7554/eLife.60293 (PMC7521926; doi:10.7554/eLife.60293)
Supplement: Figure 2—figure supplement 1—source data 1. [file elife-60293-fig2-figsupp1-data1.xlsx]

## Sheet: Fig. 2-figure supplement 1A 
	P.b. EE				S.l. EE
	I	II	III	AV	I	II	III	AV
CE	0.113618	0.128759	0.0520333	0.0981368			0.0390389	0.0390389
DAG	7.52816	6.28142	7.93757	7.24905	9.26895	9.19492	9.60736	9.35708
PA	0.0722074	0.070426	0.0368735	0.0598356	0.0154923	0.0131537	0.0175634	0.0154031
PC	46.869	45.3654	44.1106	45.4483	38.7944	38.1189	38.4895	38.4676
PE	23.4935	22.9267	23.5971	23.3391	22.7082	21.3791	22.249	22.1121
PG	0.0870245	0.0808956	0.0878103	0.0852434	0.118206	0.10957	0.107669	0.111815
PI	6.20778	6.51517	5.59782	6.10692	4.47566	4.45654	4.47824	4.47014
PS	2.94146	2.71892	2.30229	2.65422	2.84993	2.55071	2.53781	2.64615
SM	1.33893	1.36851	1.62972	1.44572	3.75497	3.76221	3.64074	3.71931
TAG	11.3117	14.5052	14.6218	13.4796	18.0142	20.4149	18.8331	19.0874

## Sheet: Fig. 2-figure supplement 1B
		I	II	III	AV	SE
NMR	P.b.	4.9	5.7	5.8	5.46667	0.2848
	S.l.	4.4			4.4
MS	P.b.	5.12396	5.12437	4.75691	5.00174	0.122419
	S.l.	2.92486	2.95206	2.87176	2.91623	0.0235784

## Sheet: Fig. 2-figure supplement 1C
	P.b. EE					S.l. EE
	I	II	III	AV	SE	I	II	III	AV	SE
PC 30:1							0.000621134	0.000551495	0.000586315	2.84298e-05
PC 32:0	0.0120921	0.00990981	0.00896309	0.0103217	0.000926431	0.00903415	0.00835997	0.00885153	0.00874855	0.000201315
PC 32:1	0.103002	0.0727126	0.040179	0.0719645	0.0181393	0.0405543	0.0423734	0.0415461	0.0414912	0.00052582
PC 32:2	0.0163094	0.0124754	0.00808219	0.012289	0.00237683	0.00819651	0.00840471	0.00876241	0.00845454	0.000165249
PC 32:3	0.0123595	0.018974	0.0174411	0.0162582	0.00199893
PC 32:4	0.00213298	0.00263913	0.00243434	0.00240215	0.000146997
PC 33:1	0.0214699	0.0216656	0.0207596	0.0212984	0.000275236	0.0177744	0.019782	0.018863	0.0188065	0.000580236
PC 33:2		0.0983172	0.0937042	0.0960107	0.00188326
PC 33:3	0.121848	0.124746	0.122822	0.123139	0.00085158	0.104375			0.104375
PC 33:4	0.135675	0.126129	0.114284	0.125363	0.0061867
PC 34:1	0.575635	0.471283	0.35122	0.466046	0.064836	0.271334	0.284789	0.281654	0.279259	0.00406462
PC 34:2	0.253575	0.24628	0.219511	0.239789	0.0103554	0.379243	0.396904	0.386525	0.387557	0.00512426
PC 34:3	0.572231	0.531245	0.478574	0.52735	0.0271063	0.0963938	0.101685	0.0998812	0.09932	0.00155301
PC 34:4	0.125661	0.103511	0.078799	0.102657	0.0135346	0.0049685	0.00574878	0.00629985	0.00567237	0.000386222
PC 34:6	0.00684804	0.0129877	0.012867	0.0109009	0.00202674
PC 35:1	0.00997509	0.0104126	0.0113205	0.0105694	0.000396207	0.00307416	0.00338109		0.00322762	0.000125304
PC 35:2	0.00962608	0.0109299	0.0134715	0.0113425	0.00112907	0.00742197	0.00783128	0.00745142	0.00756822	0.000131805
PC 35:3	0.0205236	0.0241496	0.0275971	0.0240901	0.00204214	0.00333261	0.00368509	0.00343811	0.00348527	0.000104449
PC 35:4	0.00483918	0.00585262	0.00545635	0.00538272	0.000294863
PC 35:5	0.0029369	0.00286551	0.00335038	0.00305093	0.000151138
PC 35:6	0.0043284	0.003525	0.00370501	0.0038528	0.000243407
PC 36:1	0.0632035	0.0623375	0.0541183	0.0598864	0.00289487	0.0508819	0.0546328	0.0523276	0.0526141	0.00109222
PC 36:2	0.33627	0.353831	0.31892	0.33634	0.010078	0.453339	0.474899	0.470897	0.466378	0.00662128
PC 36:3	0.481625	0.513961	0.537592	0.511059	0.0162212	0.796003	0.831785	0.796991	0.80826	0.0117661
PC 36:4	1.11888	1.08738	1.00293	1.06973	0.0346149	0.585113	0.607953	0.589956	0.594341	0.00694841
PC 36:5	0.485195	0.557907	0.598809	0.547304	0.0332233	0.0586892	0.0626567	0.0614833	0.0609431	0.00117673
PC 36:6	0.611626	0.610753	0.587939	0.603439	0.00775415
PC 37:3		0.00630447	0.00606863	0.00618655	9.62808e-05
PC 38:2						0.00634651	0.00649548	0.00658302
PC 38:3	0.00789534	0.00694753	0.00686173	0.00723487	0.000331165	0.00700525	0.00733324	0.0072576	0.0071987	9.91571e-05
PC 38:4		0.00557657		0.00557657		0.00989496	0.0106321	0.0100924	0.0102065
PC 38:5	0.00819902	0.00875961	0.00912571	0.00869478	0.000269471	0.0118845	0.0127282	0.0129004	0.0125044	0.000313886
