# Supplementary material for: Phosphatidylcholines from Pieris brassicae eggs activate an immune response in Arabidopsis
Source: eLife. 2020 Sep 28;9:e60293. doi: 10.7554/eLife.60293 (PMC7521926; doi:10.7554/eLife.60293)
Supplement: Figure 2—figure supplement 2—source data 1. [file elife-60293-fig2-figsupp2-data1.xlsx]

## Sheet: Fig. 2-figure supplement 2
	A	B	C	AV	SE
UT	0.962452	1.0398	1.016	1.00608	0.0228724
EE	457.976	551.993	492.3	500.756	27.4677
EE+PLA2	96.6131	105.335	107.078	103.009	3.23728
EE+PLD	252.213	273.565	258.267	261.348	6.35337
