# Supplementary material for: Phosphatidylcholines from Pieris brassicae eggs activate an immune response in Arabidopsis
Source: eLife. 2020 Sep 28;9:e60293. doi: 10.7554/eLife.60293 (PMC7521926; doi:10.7554/eLife.60293)
Supplement: Figure 2—source data 1. [file elife-60293-fig2-data1.xlsx]

## Sheet: Fig. 2A
	PC	LPC1	LPC2	SM	PE	LPE
1
2			0.0307
3			0.0945
4
5		0.0239	0.4047			0.1044
6
7
8
9				0.018
10	0.186
11	0.0679
12	0.1593			0.0762
13	0.1225
14	0.2712			0.0857	0.0697
15	0.1444			0.0104	0.0354
16	0.4136			0.0487	0.1192
17	0.28			0.0385	0.084

## Sheet: Fig. 2B
	I	II	III	AV
CE	0.113618	0.128759	0.0520333	0.0981368
DAG	7.52816	6.28142	7.93757	7.24905
PA	0.0722074	0.070426	0.0368735	0.0598356
PC	46.869	45.3654	44.1106	45.4483
PE	23.4935	22.9267	23.5971	23.3391
PG	0.0870245	0.0808956	0.0878103	0.0852434
PI	6.20778	6.51517	5.59782	6.10692
PS	2.94146	2.71892	2.30229	2.65422
SM	1.33893	1.36851	1.62972	1.44572
TAG	11.3117	14.5052	14.6218	13.4796

## Sheet: Fig. 2C
	I	II	III	AV	SE
PC 30:1
PC 32:0	0.0120921	0.00990981	0.00896309	0.0103217	0.000926431
PC 32:1	0.103002	0.0727126	0.040179	0.0719645	0.0181393
PC 32:2	0.0163094	0.0124754	0.00808219	0.012289	0.00237683
PC 32:3	0.0123595	0.018974	0.0174411	0.0162582	0.00199893
PC 32:4	0.00213298	0.00263913	0.00243434	0.00240215	0.000146997
PC 33:1	0.0214699	0.0216656	0.0207596	0.0212984	0.000275236
PC 33:2		0.0983172	0.0937042	0.0960107	0.00188326
PC 33:3	0.121848	0.124746	0.122822	0.123139	0.00085158
PC 33:4	0.135675	0.126129	0.114284	0.125363	0.0061867
PC 34:1	0.575635	0.471283	0.35122	0.466046	0.064836
PC 34:2	0.253575	0.24628	0.219511	0.239789	0.0103554
PC 34:3	0.572231	0.531245	0.478574	0.52735	0.0271063
PC 34:4	0.125661	0.103511	0.078799	0.102657	0.0135346
PC 34:6	0.00684804	0.0129877	0.012867	0.0109009	0.00202674
PC 35:1	0.00997509	0.0104126	0.0113205	0.0105694	0.000396207
PC 35:2	0.00962608	0.0109299	0.0134715	0.0113425	0.00112907
PC 35:3	0.0205236	0.0241496	0.0275971	0.0240901	0.00204214
PC 35:4	0.00483918	0.00585262	0.00545635	0.00538272	0.000294863
PC 35:5	0.0029369	0.00286551	0.00335038	0.00305093	0.000151138
PC 35:6	0.0043284	0.003525	0.00370501	0.0038528	0.000243407
PC 36:1	0.0632035	0.0623375	0.0541183	0.0598864	0.00289487
PC 36:2	0.33627	0.353831	0.31892	0.33634	0.010078
PC 36:3	0.481625	0.513961	0.537592	0.511059	0.0162212
PC 36:4	1.11888	1.08738	1.00293	1.06973	0.0346149
PC 36:5	0.485195	0.557907	0.598809	0.547304	0.0332233
PC 36:6	0.611626	0.610753	0.587939	0.603439	0.00775415
PC 37:3		0.00630447	0.00606863	0.00618655	9.62808e-05
PC 38:2
PC 38:3	0.00789534	0.00694753	0.00686173	0.00723487	0.000331165
PC 38:4		0.00557657		0.00557657
PC 38:5	0.00819902	0.00875961	0.00912571	0.00869478	0.000269471

## Sheet: Fig. 2D
	I	II	III	AV	SE
NMR	4.9	5.7	5.8	5.46667	0.2848
MS	5.12396	5.12437	4.75691	5.00174	0.122419

## Sheet: Fig. 2E
	I	II	III	AV	SE
UT	0.496049	0.970049	1.00556	0.823886	0.164238
EE	474.288	163.357	499.27	378.972	108.048
EE+PLD+PLA2	41.8719	12.332	35.7854	29.9964	9.00528

## Sheet: Fig. 2G
	I	II	III	AV	SE
UT	0.357771	3.65413	136.799	46.9369	44.941		Welch's two sample t-test on log-transformed data
EE	1037.97	1187.97	1829.65	1351.86	242.788		UT-EE	0.035023
Ctl	70.6598	5.56705	322.222	132.816	96.5492		Ctl-SELM	0.0285723
SELM	1393.69	1107.46	659.646	1053.6	213.605		Ctl-PC-Mix	0.040209
SELM-PC	8.90734	10.7209	20.1537	13.2607	3.48605
PC-Mix	697.459	930.395	401.163	676.339	153.141
