# Supplementary material for: Phosphatidylcholines from Pieris brassicae eggs activate an immune response in Arabidopsis
Source: eLife. 2020 Sep 28;9:e60293. doi: 10.7554/eLife.60293 (PMC7521926; doi:10.7554/eLife.60293)
Supplement: Figure 3—figure supplement 1—source data 1. [file elife-60293-fig3-figsupp1-data1.xlsx]

## Sheet: Fig. 3-figure supplement 1
	I	II	III	AV	SE
Ctl	70.265	128.078	95.7674	98.0366	16.7275		Welch's two sample t-test on log-transformed data
PC(18:1/18:1)	1095.35	318.076	556.561	656.664	229.896		Ctl_PC(18:1/18:1)		0.02161
LPC(18:1)	58.7265	25.2309	43.0753	42.3442	9.67626		Ctl_LPC(18:1)		0.0514
PE(18:1/18:1)	0.581344	10.6296	116.465	42.5586	37.0668		Ctl_PE(18:1/18:1)		0.2622
LPE(18:1)	66.559	11.8745	132.27	70.2345	34.8037		Ctl_LPE(18:1)		0.4319
PA(18:1/18:1)	193.722	272.29	342.222	269.411	42.8922		Ctl_PA(18:1/18:1)		0.0134
DAG(16:0/18:1)		12.8075	71.0068	41.9071	29.0997		Ctl_DAG(16:0/18:1)		0.4012
TAG(18:1/18:1/18:1)	6.01943	139.397	0.834568	48.7502	45.3479		Ctl_TAG(18:1/18:1/18:1)		0.2515
