# Supplementary material for: Phosphatidylcholines from Pieris brassicae eggs activate an immune response in Arabidopsis
Source: eLife. 2020 Sep 28;9:e60293. doi: 10.7554/eLife.60293 (PMC7521926; doi:10.7554/eLife.60293)
Supplement: Figure 3—source data 1. [file elife-60293-fig3-data1.xlsx]

## Sheet: Fig. 3C
	I	II	III	IV	AV	SE
UT	6.16965	1.18488	0.1516	0.170571	1.91918	1.43723
EE	1464.64	1153.97	1272.51	1046.1	1234.3	89.6237
Ctl	38.1898	52	1.18226	0.28314	22.9138	13.1142
0.02	227.282	138.442	69.3035	187.596	155.656	34.0386
0.1	331.106	157.731	86.9647	178.081	188.471	51.3981
0.2	586.559	382.608	110.161	130.782	302.527	113.133
1	521.924	518.785	108.457		383.055	137.302
2	309.383	564.342			436.862	127.48
5	1580.23		246.418	95.5106	640.718	471.769
10	1608.21	2084.09	231.327	513.681	1109.33	440.145
20	1515.49	2142.91	1013.62	761.097	1358.28	304.929
