# Supplementary material for: Phosphatidylcholines from Pieris brassicae eggs activate an immune response in Arabidopsis
Source: eLife. 2020 Sep 28;9:e60293. doi: 10.7554/eLife.60293 (PMC7521926; doi:10.7554/eLife.60293)
Supplement: Figure 4—source data 1. [file elife-60293-fig4-data1.xlsx]

## Sheet: Fig. 4
	P.b.					S.l.								I	II	III	AV	SE
	I	II	III	AV	SE	I	II	III	AV	SE		Total PC amount	P.b.	0.604658	0.817819	1.3459	0.922794	0.220323
PC30:1	0.0282938	0.0310946	0.0367379	0.0320421	0.0024832	0.0601086	0.0691956	0.0667408	0.0653483	0.00271399			S.l.	3.2477	4.10951	4.71104	4.02275	0.42465
PC30:2	0.0172241	0.0173691	0.0174469	0.0173467	6.52624e-05	0.022273	0.0237462	0.021335	0.0224514	0.000701752
PC30:3	0.0167655	0.0167599	0.0168429	0.0167895	2.67888e-05	0.0168957	0.0171493	0.0169442	0.0169964	7.77209e-05
PC30:4	0.0167046	0.0167039	0.01671	0.0167062	1.93404e-06	0.0167898	0.0184349	0.0172835	0.0175027	0.000487373
PC30:5	0.016713	0.0167076	0.0167024	0.0167077	3.04054e-06	0.0167777	0.0171199	0.0168237	0.0169071	0.000107229
PC30:6	0.0167722	0.0167551	0.0167667	0.0167646	5.03637e-06	0.0169883	0.0170633	0.0168845	0.0169787	5.18447e-05
PC31:0	0.0171914	0.017243	0.0172979	0.0172441	3.07517e-05	0.0175903	0.0183538	0.0178522	0.0179321	0.000224006
PC31:1	0.0171003	0.0172121	0.0172537	0.0171887	4.58013e-05	0.0180512	0.0206341	0.0187025	0.0191292	0.000775547
PC31:2	0.0167893	0.0168066	0.0168215	0.0168058	9.30302e-06	0.0170524	0.0215327	0.0182699	0.0189517	0.00133752
PC31:3	0.0167642	0.0167572	0.016791	0.0167708	1.03102e-05	0.0168858	0.0228383	0.0184841	0.0194027	0.00177865
PC31:4	0.0166994	0.016705	0.0167067	0.0167037	2.21324e-06	0.0168017	0.0172988	0.0168994	0.017	0.00015206
PC31:5	0.0166932	0.0166906	0.016701	0.0166949	3.11273e-06	0.0167625	0.0168049	0.0167422	0.0167699	1.84952e-05
PC31:6	0.0167433	0.0167763	0.0167602	0.0167599	9.53717e-06	0.0168936	0.0170167	0.0169144	0.0169415	3.80372e-05
PC32:0	0.0200586	0.023349	0.0246275	0.0226784	0.0013609	0.038717	0.0454392	0.0518002	0.0453188	0.00377728
PC32:1	0.0277404	0.0650179	0.0477179	0.0468254	0.0107703	0.0950528	0.10429	0.109497	0.102947	0.00422346
PC32:2	0.0224911	0.0306663	0.0220087	0.0250554	0.00280892	0.0442744	0.0442757	0.0408571	0.0431357	0.00113932
PC32:3	0.0177859	0.0180246	0.0182486	0.0180197	0.000133591	0.0183027	0.0191627	0.0189333	0.0187996	0.000257115
PC32:4	0.0168068	0.0169105	0.0168149	0.016844	3.33205e-05	0.0168552	0.0179092	0.0171016	0.0172887	0.000318305
PC32:5	0.0167038	0.0167059	0.0167069	0.0167055	9.28964e-07	0.0167651	0.0193475	0.0175397	0.0178841	0.000765123
PC32:6	0.0167671	0.0167776	0.0168016	0.0167821	1.01968e-05	0.0168875	0.0207135	0.0180761	0.0185591	0.00113056
PC33:0	0.0172169	0.0171701	0.0172428	0.01721	2.12814e-05	0.0182728	0.0191097	0.0186248	0.0186691	0.000242623
PC33:1	0.017493	0.0177968	0.0176298	0.0176399	8.78391e-05	0.0205456	0.0211158	0.0211494	0.0209369	0.00019591
PC33:2	0.0173682	0.0173652	0.0172241	0.0173192	4.75442e-05	0.0191478	0.0196909	0.019282	0.0193736	0.000163307
PC33:3	0.0170486	0.0170847	0.0171366	0.0170899	2.55275e-05	0.0171438	0.0173171	0.0171962	0.0172191	5.13145e-05
PC33:4	0.0168002	0.0168163	0.016816	0.0168109	5.3116e-06	0.0168027	0.0169192	0.0167958	0.0168392	4.00122e-05
PC33:5	0.0167169	0.0167147	0.0167435	0.016725	9.24081e-06	0.0168026	0.0175906	0.0169816	0.0171249	0.000238487
PC33:6	0.016934	0.0169526	0.0171645	0.017017	7.39367e-05	0.0182116	0.0188593	0.0192855	0.0187855	0.000312207
PC34:0	0.0270758	0.0293861	0.0454062	0.033956	0.00576379	0.0746042	0.089827	0.110107	0.0915128	0.0102834
PC34:1	0.12393	0.146228	0.322497	0.197552	0.0628032	0.540518	0.603406	0.834044	0.659323	0.0892268
PC34:2	0.0677726	0.1069	0.126764	0.100479	0.0173293	0.679601	0.823378	0.968155	0.823712	0.0832983
PC34:3	0.121257	0.14749	0.21951	0.162752	0.0293719	0.209686	0.264076	0.281685	0.251816	0.0216696
PC34:4	0.0254588	0.0577967	0.0400392	0.0410982	0.00935017	0.0316802	0.0337578	0.0345357	0.0333245	0.000852299
PC34:5	0.0174657	0.0176216	0.0174729	0.0175201	5.08369e-05	0.0171273	0.0174389	0.0172592	0.0172751	9.0315e-05
PC34:6	0.0176321	0.017675	0.0174256	0.0175776	7.69752e-05	0.0169341	0.0172126	0.0169633	0.0170367	8.8372e-05
PC35:0	0.0173092	0.0173413	0.0175937	0.0174148	8.99697e-05	0.0182517	0.0213131	0.0199529	0.0198392	0.000885558
PC35:1	0.0195321	0.0197437	0.0208168	0.0200309	0.000397688	0.0230565	0.0297445	0.0277959	0.0268656	0.0019859
PC35:2	0.0190422	0.0192107	0.0190628	0.0191052	5.30621e-05	0.0262419	0.0319635	0.0313344	0.0298466	0.00181148
PC35:3	0.0206386	0.0207128	0.0204889	0.0206134	6.58624e-05	0.0201392	0.0215332	0.0217632	0.0211452	0.000507363
PC35:4	0.0173417	0.0175269	0.0176669	0.0175118	9.41789e-05	0.0173497	0.0176375	0.0176115	0.0175329	9.19072e-05
PC35:5	0.0168899	0.0169785	0.0169876	0.016952	3.11569e-05	0.0168933	0.0174918	0.0171124	0.0171658	0.00017485
PC35:6	0.0171062	0.0171174	0.0174574	0.017227	0.000115234	0.0189037	0.0210113	0.0207479	0.020221	0.000662996
PC36:0	0.0187376	0.0189699	0.0214673	0.0197249	0.000873758	0.0264808	0.0283441	0.0303795	0.0284015	0.00112582
PC36:1	0.041198	0.0467759	0.0756258	0.0545332	0.0106685	0.149458	0.174682	0.211037	0.178393	0.0178729
PC36:2	0.0981624	0.123799	0.20092	0.140961	0.0308797	0.738896	0.889087	0.976052	0.868012	0.0692674
PC36:3	0.131093	0.159549	0.234967	0.175203	0.0309905	1.10832	1.35023	1.5527	1.33709	0.128449
PC36:4	0.233631	0.258049	0.477254	0.322978	0.0774596	0.8457	1.12104	1.25612	1.07428	0.120761
PC36:5	0.102849	0.122559	0.147095	0.124168	0.0127982	0.128895	0.196603	0.22138	0.182293	0.0276402
PC36:6	0.106631	0.118517	0.167227	0.130792	0.0185378	0.0264656	0.030056	0.0299926	0.028838	0.00118636
PC37:0	0.0173816	0.0177268	0.0177657	0.0176247	0.000122041	0.0248455	0.033267	0.0311134	0.029742	0.00252593
PC37:1	0.0184647	0.0190943	0.0198919	0.0191503	0.000412933	0.0200746	0.0276101	0.0237928	0.0238259	0.00217536
PC37:2	0.0176759	0.0178006	0.0182481	0.0179082	0.00017371	0.0229166	0.0362465	0.0301082	0.0297571	0.003852
PC37:3	0.0183344	0.018525	0.0191606	0.0186733	0.000249789	0.0229946	0.0357575	0.0280027	0.0289183	0.00371267
PC37:4	0.0176848	0.0176677	0.0180093	0.0177873	0.000111149	0.0199628	0.0218371	0.0202548	0.0206849	0.000582236
PC37:5	0.0172674	0.0172276	0.0173622	0.0172858	3.9906e-05	0.0173953	0.0177182	0.0175472	0.0175536	9.3274e-05
PC37:6	0.0169429	0.0169258	0.0170268	0.0169651	3.11934e-05	0.0172559	0.0174496	0.0175122	0.0174059	7.71447e-05
PC38:0	0.033608	0.0336248	0.0337886	0.0336738	5.75948e-05	0.0352465	0.0363901	0.0351309	0.0355892	0.00040187
PC38:1	0.0347219	0.0349469	0.0358261	0.0351649	0.000336896	0.0384876	0.0389745	0.03809	0.0385173	0.00025578
PC38:2	0.0348245	0.035609	0.03673	0.0357211	0.000552912	0.044017	0.0460234	0.0440811	0.0447072	0.000658392
PC38:3	0.0360682	0.0374425	0.0394902	0.037667	0.000994196	0.0413532	0.0429325	0.044111	0.0427989	0.000798909
PC38:4	0.0355293	0.0363743	0.0383383	0.0367473	0.000832058	0.0389731	0.0413883	0.0407689	0.0403767	0.000724262
PC38:5	0.0187193	0.0192871	0.0207957	0.0196007	0.000619578	0.0246582	0.0308344	0.0280985	0.0278637	0.0017868
