# Supplementary material for: Phosphatidylcholines from Pieris brassicae eggs activate an immune response in Arabidopsis
Source: eLife. 2020 Sep 28;9:e60293. doi: 10.7554/eLife.60293 (PMC7521926; doi:10.7554/eLife.60293)
Supplement: Figure 5—source data 1. [file elife-60293-fig5-data1.xlsx]

## Sheet: Fig. 5A
		I			II			III
		A	B	C	A	B	C	A	B	C	AV	SE
Col-0	UT	1.0665	0.0261789	3.76878	0.128519	0.0864643	0.150652	0.192182	-0.159154	-0.32527	0.548317	0.422472		Welch's two sample t-test
	OP	17.0285	9.10291	10.2881	0.390345	1.90329	1.25185	8.73349	9.36264	9.26382	7.48055	1.78786		Col-0_OP-I.8_OP	2.791e-06
	EE	8.77293	8.34375	4.20108	9.69039	9.30654	6.35695	4.10303	7.19922	4.14535	6.90214	0.766029		Col-0_EE-I.8_EE	1.368e-05
	Ctl	0.00216931	1.42342	0.000219313	0.0844464	0.0786427	0.299301	1.71363	0.0963267	0.689688	0.487538	0.217666		Col-0_PC-Mix-I-8_PC-Mix	2.513e-05
	PC-Mix	3.05164	3.27294	5.97923	4.75998	6.81869	6.53773	5.32067	5.98455	6.71133	5.38186	0.473698		Col-0_PC(16:1/16:1)-I.8_PC(16:1/16:1)	1.834e-05
	PC(16:1/16:1)	5.2215	3.72446	5.45865	3.78904	4.58395	8.98573	5.03347	3.79406	6.37643	5.21859	0.556925		Col-0_PC(18:3/18:3)-I.8_PC(18:3/18:3)	1.531e-05
	PC(18:3/18:3)	3.59342	7.71443	4.71628	3.45089	8.37605	6.0962	3.33501	4.78773	6.16093	5.35899	0.617244
	LW	0.151082	0.670424	0.102396	0.0876325	0.138279	0.0979305	-0.384962	0.771393	1.39561	0.336643	0.174411
lecrk-I.8	UT	-0.0345748	-0.0418426	-0.0134256	0.0827177	0.0923907	0.0912009	-0.206732	-0.331521	-0.208468	-0.0633617	0.0509348
	OP	1.11109	2.63345	1.05295	1.86296	0.235159	0.485537	3.19124	2.61394	2.80867	1.77722	0.363597
	EE	3.41802	4.17474	3.72459	3.93225	0.409677	3.92991	4.79588	2.01366	1.81108	3.13442	0.470997
	Ctl	0.000207648	0.00822948	-0.041768	0.000609371	-0.0451627	0.00535728	-0.317745	-0.240683	0.0550154	-0.0639933	0.0423185
	PC-Mix	1.31731	2.79003	0.822715	4.77693	3.25176	4.89884	0.792748	2.45759	2.7277	2.6484	0.507859
	PC(16:1/16:1)	2.24623	1.09369	2.19967	2.12343	3.18388	6.29314	3.54954	1.95924	4.34975	2.99984	0.523034
	PC(18:3/18:3)	2.49294	1.18296	1.36986	3.3283	1.93901	3.535	2.72095	2.43869	0.999229	2.22299	0.305009
	LW	0.16108	0.105589	0.187942	-0.00430382	0.261791	0.131777	-0.139581	-0.185547	0.00595261	0.0583	0.0502344

## Sheet: Fig. 5B
PR1		A	B	C	AV	SE
Col-0	UT	5.55593	6.26959	4.89836	5.57463	0.395949		Welch's two-sample t-test on log-transformed data
	OP	830.073	935.359	1193.17	986.2	107.855		Col-0_OP-I.8_OP	0.001172
	EE	1291.08	1254.04	909.573	1151.57	121.468		Col-0_EE-I.8_EE	0.01361
	Ctl	11.3586	14.4523	14.7935	13.5348	1.09253		Col-0_PC-Mix-I-8_PC-Mix	0.001467
	PC-Mix	457.565	567.291	659.027	561.294	58.2343		Col-0_PC(16:1/16:1)-I.8_PC(16:1/16:1)	0.000916
	PC(16:1/16:1)	878.927	960.344	970.604	936.625	29.0006		Col-0_PC(18:3/18:3)-I.8_PC(18:3/18:3)	0.01025
	PC(18:3/18:3)	935.16	602.742	989.977	842.627	120.981
	LW	0.761244	0.937967	0.985984	0.895065	0.068331
lecrk-I.8	UT	0.315906	0.347848	0.412731	0.358828	0.028485
	OP	285.752	240.72	304.945	277.139	19.0339
	EE	497.537	533.723	568.71	533.323	20.5469
	Ctl	0.628185	0.474942	0.612	0.571709	0.0486086
	PC-Mix	94.9572	93.8536	105.962	98.2577	3.86548
	PC(16:1/16:1)	341.832	404.674	412.895	386.467	22.4434
	PC(18:3/18:3)	179.65	176.125	179.576	178.451	1.16274
	LW	2.87833	2.41521	3.98393	3.09249	0.465338
SAG13		A	B	C	AV	SE
Col-0	UT	0.0915633	0.0865619	0.0837266	0.0872839	0.00229086		Welch's two-sample t-test on log-transformed data
	OP	14.9136	13.6242	12.3012	13.613	0.754171		Col-0_OP-I.8_OP	2.12e-05
	EE	23.9333	22.7261	23.1896	23.283	0.351616		Col-0_EE-I.8_EE	0.006234
	Ctl	0.029523	0.0298552	0.034116	0.0311648	0.00147874		Col-0_PC-Mix-I-8_PC-Mix	2.594e-05
	PC-Mix	6.63123	6.44917	7.41648	6.83229	0.296785		Col-0_PC(16:1/16:1)-I.8_PC(16:1/16:1)	0.000878
	PC(16:1/16:1)	4.9582	3.94851	5.02262	4.64311	0.347797		Col-0_PC(18:3/18:3)-I.8_PC(18:3/18:3)	2.731e-05
	PC(18:3/18:3)	8.46539	8.74731	9.0081	8.74027	0.156705
	LW	0.0313994	0.0340142	0.0329621	0.0327919	0.000759619
lecrk-I.8	UT	0.0152997	0.015688	0.0139041	0.0149639	0.000541616
	OP	2.31658	2.12468	1.99747	2.14625	0.0927488
	EE	8.84963	7.80974	6.36977	7.67638	0.718973
	Ctl	0.00860741	0.00672371	0.00751654	0.00761589	0.000546041
	PC-Mix	0.493576	0.510021	0.408691	0.470763	0.0313968
	PC(16:1/16:1)	1.50986	1.53142	1.34104	1.46077	0.0601888
	PC(18:3/18:3)	1.66996	1.58315	1.48023	1.57778	0.0548368
	LW	0.285237	0.393025	0.229877	0.302713	0.0479005
TI		A	B	C	AV	SE
Col-0	UT	0.00105372	0.00170404	0.00141426	0.00139067	0.000188101		Welch's two-sample t-test on log-transformed data
	OP	29.056	33.2026	42.9512	35.07	4.11842		Col-0_OP-I.8_OP	5.429e-06
	EE	27.9681	25.582	18.0615	23.8705	2.98508		Col-0_EE-I.8_EE	0.001603
	Ctl	0.000574164	0.000292191	0.00061705	0.000494468	0.000101894		Col-0_PC-Mix-I-8_PC-Mix	5.835e-06
	PC-Mix	6.72915	7.1932	8.16862	7.36366	0.424189		Col-0_PC(16:1/16:1)-I.8_PC(16:1/16:1)	ns
	PC(16:1/16:1)	0.0657054	0.0675686	0.0777188	0.0703309	0.00373288		Col-0_PC(18:3/18:3)-I.8_PC(18:3/18:3)	0.0005138
	PC(18:3/18:3)	9.02521	5.36018	9.57372	7.98637	1.32261
	LW	0.00034195	0.000866439	0.000838836	0.000682408	0.000170416
lecrk-I.8	UT	0.00106039	0.00135476	0.00121467	0.00120994	8.50128e-05
	OP	0.0346627	0.0270516	0.0307299	0.0308147	0.00219753
	EE	2.92255	2.89082	3.3887	3.06736	0.16093
	Ctl	0.00322534	0.00259237	0.0031358	0.0029845	0.000197765
	PC-Mix	0.00226069	0.00246803	0.00320825	0.00264566	0.000287592
	PC(16:1/16:1)	0.193733	0.224786	0.243425	0.220648	0.0144933
	PC(18:3/18:3)	0.0434732	0.0379865	0.0460366	0.0424988	0.0023744
	LW	0.0941628	0.0809045	0.119111	0.0980594	0.0112

## Sheet: Fig. 5D
		A	B	C	D	E	F	AV	SE
Col-0	UT	0.0885775	0.00105764	0.0198308	0.7578	0.00105764	0.00687467	0.145866	0.123138		Mann-Whitney-U-test
	EE	68.9286	16.4675	83.761	20.5333	52.6042		48.4589	13.2017		Col-0_EE-I.8_EE	0.03175
	Ctl	0.27578	0.00343733	0.226335	0.0653094	0.448176		0.203808	0.0789725		Col-0_PC-Mix-I-8_PC-Mix	0.002165
	PC-Mix	11.5738	21.9331	4.54363	6.44553	9.47753	10.5082	10.747	2.47969		Col-0_PC(16:1/16:1)-I.8_PC(16:1/16:1)	0.08225
	PC(16:1/16:1)	3.93072	2.27604	12.009	2.11185	12.3733		6.54019	2.32955		Col-0_PC(18:3/18:3)-I.8_PC(18:3/18:3)	0.004329
	PC(18:3/18:3)	1.39238	4.49894	3.97409	3.70703	3.92411	3.90402	3.56676	0.448104
lecrk-I.8	UT	0.00740349	0.521682	0.466684	0.433104	0.228451	0.00793231	0.277543	0.0944551
	EE	8.00053	5.21946	7.03622	28.0061	1.42967		9.93839	4.65449
	Ctl	0.0346378	0.0356954	0.0169223	0.136171	0.155209	0.0121629	0.0651331	0.0258758
	PC-Mix	1.83342	0.0684823	0.0169223	0.111581	1.65177	0.173982	0.642693	0.349244
	PC(16:1/16:1)	6.61343	0.183765	2.91486	0.151507	1.73982	0.0182443	1.93694	1.04575
	PC(18:3/18:3)	0.00898995	0.149127	0.0116341	2.96219	0.0319937	0.0126917	0.529438	0.487045

## Sheet: Fig. 5E
		A	B	C	D	E	F	AV	SE
Col-0	UT	1.84848	1.34579	0.245982	0.535687	0.0930814	0.342282	0.735218	0.286244		Welch's two sample t-test
	EE	46.912	32.0339	35.0321	50.132	79.6417	57.2866	50.1731	7.04253		Col-0_EE-I.8_EE	0.02329
	Ctl	0.0485525	0.270392	0.0614284	0.236861	0.318945	0.313311	0.208248	0.0500104		Col-0_PC-Mix-I-8_PC-Mix	0.0009072
	PC-Mix	19.8408	13.5872	17.2359	18.0074	13.3157	21.21	17.1995	1.31462		Col-0_PC(16:1/16:1)-I.8_PC(16:1/16:1)	0.002914
	PC(16:1/16:1)	23.4144	12.5899	5.80109	17.7544	3.646	14.8737	13.0132	3.02249		Col-0_PC(18:3/18:3)-I.8_PC(18:3/18:3)	0.003549
	PC(18:3/18:3)	9.12171	19.0339	22.0074	20.7692	7.34646	7.75017	14.3382	2.83857
lecrk-I.8	UT	3.02018	1.16982	0.00992511	0.450117	0.268246	0.839074	0.959561	0.445127
	EE	27.5862	29.7455	19.9382	28.9054	32.9181	27.3799	27.7455	1.76271
	Ctl	0.716485	1.03838	0.292925	4.60605	1.0239	0.725606	1.40056	0.650605
	PC-Mix	1.1489	3.20286	0.142707	3.79944	5.39389	5.61278	3.21676	0.904551
	PC(16:1/16:1)	2.23181	4.12858	7.39098	6.02078	3.69455		4.69334	0.905954
	PC(18:3/18:3)	13.4533	0.543198	9.60294	4.87215	1.73233	6.13506	6.05651	1.98153
