# Supplementary material for: Phosphatidylcholines from Pieris brassicae eggs activate an immune response in Arabidopsis
Source: eLife. 2020 Sep 28;9:e60293. doi: 10.7554/eLife.60293 (PMC7521926; doi:10.7554/eLife.60293)
Supplement: Supplementary file 1. — Plants were naturally oviposited by P. brassicae butterflies and leaves containing one egg batch (ca. 20-30 eggs) were harvested after 5 days. For EE treatment, leaves were treated with 2 x 2 microL of EE (corresponding to ca. 30 eggs) and harvested after 5 days. [file elife-60293-supp1.xlsx]

## Sheet: RNAseq data
Table S1. RNAseq analysis of Arabidopsis leaves after oviposition or EE treatment.
Plants were naturally oviposited by P. brassicae butterflies and leaves containing one egg batch (ca. 20-30 eggs) were harvested after 5 days. For EE treatment, leaves were treated with 2 x 2 microL of EE (corresponding to ca. 30 eggs) and harvested after 5 days.
Gene_ID	Mormalized counts (log2)												log2FC	adj.P.Val 0.05	log2FC	adj.P.Val 0.05
	control	control	control	mean	oviposition	oviposition	oviposition	mean	egg extract	egg extract	egg extract	mean	Oviposition 5 days		Egg extract 5 days		Description	Associated_Gene_Name	Gene_Start	Gene_End	Strand	Transcript_Count	Gene_Source
AT1G01010	2.40418	2.38227	1.21315	1.99987	2.64171	3.09561	3.07637	2.9379	3.24313	3.34873	3.25752	3.28313	0.938027	0.0654081	1.28325	0.0126271	NAC domain containing protein 1 [Source:TAIR_LOCUS;Acc:AT1G01010]	ANAC001	3631	5899	1	1	TAIR Gene Name
AT1G01020	4.43348	3.08996	4.00007	3.84117	3.57724	3.39759	3.21355	3.39613	3.50603	3.45427	3.62666	3.52899	-0.445041	0.341991	-0.312182	0.574457	Arv1-like protein [Source:TAIR_LOCUS;Acc:AT1G01020]	ARV1	5928	8737	-1	2	TAIR Gene Name
AT1G01030	0.0760776	-0.604035	0.330951	-0.0656688	-0.99664	0.0366445	-1.02633	-0.662107	-0.224752	0.172743	0.0382274	-0.00459372	-0.596438	0.677475	0.0610751	0.979073	AP2/B3-like transcriptional factor family protein [Source:TAIR_LOCUS;Acc:AT1G01030]	NGA3	11649	13714	-1	1	TAIR Gene Name
AT1G01040	5.76124	6.28608	6.05719	6.03484	6.12448	5.41993	5.93794	5.82745	5.8043	6.10046	5.9638	5.95619	-0.207387	0.702941	-0.0786493	0.916883	dicer-like 1 [Source:TAIR_LOCUS;Acc:AT1G01040]	DCL1	23146	31227	1	2	TAIR Gene Name
AT1G01050	5.77651	5.47609	5.46016	5.57092	5.79594	5.97491	5.64196	5.80427	5.48984	5.6697	5.73094	5.63016	0.233351	0.576043	0.0592376	0.929669	pyrophosphorylase 1 [Source:TAIR_LOCUS;Acc:AT1G01050]	AtPPa1	31170	33153	-1	1	TAIR Gene Name
AT1G01060	1.50065	0.128869	-0.0203975	0.536373	0.210381	-0.171082	1.59447	0.54459	1.00401	-0.156279	0.491552	0.446426	0.00821691	0.997422	-0.0899465	0.969733	Homeodomain-like superfamily protein [Source:TAIR_LOCUS;Acc:AT1G01060]	LHY	33379	37871	-1	5	TAIR Gene Name
AT1G01070	1.57776	1.97047	0.548276	1.3655	2.03129	2.50928	2.72084	2.42047	2.55533	2.51803	3.10572	2.72636	1.05497	0.12886	1.36086	0.0436904	nodulin MtN21 /EamA-like transporter family protein [Source:TAIR_LOCUS;Acc:AT1G01070]	UMAMIT28	38752	40944	-1	2
AT1G01080	6.79845	5.77858	6.71303	6.43002	6.19872	5.66643	6.23426	6.03314	6.1157	5.79716	5.93519	5.94935	-0.396883	0.702513	-0.480667	0.612265	RNA-binding (RRM/RBD/RNP motifs) family protein [Source:TAIR_LOCUS;Acc:AT1G01080]		45296	47019	-1	2
AT1G01090	6.5127	6.7854	7.51641	6.93817	7.24381	6.77002	7.03082	7.01488	6.60102	6.5462	6.77911	6.64211	0.0767138	0.916201	-0.296061	0.495695	pyruvate dehydrogenase E1 alpha [Source:TAIR_LOCUS;Acc:AT1G01090]	PDH-E1 ALPHA	47485	49286	-1	1	TAIR Gene Name
AT1G01100	5.80199	5.60496	7.92485	6.44393	8.33553	6.55757	6.125	7.00603	6.38102	6.15162	6.60983	6.38082	0.562098	0.794	-0.0631097	0.983061	60S acidic ribosomal protein family [Source:TAIR_LOCUS;Acc:AT1G01100]	RPP1A	50075	51199	-1	4	UniProtKB Gene Name
AT1G01120	4.76326	4.60112	6.57094	5.31177	4.70899	4.78273	6.52219	5.33797	4.23237	3.59143	5.71041	4.5114	0.0261999	0.990197	-0.800368	0.451007	3-ketoacyl-CoA synthase 1 [Source:TAIR_LOCUS;Acc:AT1G01120]	KCS1	57269	59167	-1	1	TAIR Gene Name
AT1G01140	6.67851	6.31092	5.12176	6.03706	6.49552	6.23251	6.95611	6.56138	7.08552	6.51134	6.85666	6.81784	0.524319	0.582119	0.780777	0.321522	CBL-interacting protein kinase 9 [Source:TAIR_LOCUS;Acc:AT1G01140]	CIPK9	64166	67625	-1	3	TAIR Gene Name
AT1G01160	4.13487	5.34967	5.23845	4.90767	5.71883	5.37465	4.58515	5.22621	4.95447	5.2973	4.52608	4.92595	0.318544	0.73253	0.018286	0.989852	GRF1-interacting factor 2 [Source:TAIR_LOCUS;Acc:AT1G01160]	GIF2	72339	74096	1	2	TAIR Gene Name
AT1G01170	6.24272	5.11787	7.78781	6.3828	7.3331	5.24669	5.85326	6.14435	6.07579	5.20378	5.8915	5.72369	-0.238451	0.918562	-0.659111	0.69121	Protein of unknown function (DUF1138) [Source:TAIR_LOCUS;Acc:AT1G01170]	AT1G01170/F6F3_5	73931	74737	-1	2	UniProtKB Gene Name
AT1G01180	2.01014	2.50735	3.83852	2.78534	4.22161	2.57665	3.50404	3.4341	4.019	3.32991	3.78221	3.71037	0.648761	0.592033	0.925033	0.363432	S-adenosyl-L-methionine-dependent methyltransferases superfamily protein [Source:TAIR_LOCUS;Acc:AT1G01180]	AT1G01180	75583	76758	1	1	UniProtKB Gene Name
AT1G01190	0.561529	-2.66301	1.55478	-0.182235	0.274696	-3.24985	0.0853854	-0.963258	-1.0273	-5.07781	-0.111388	-2.07217	-0.781022	0.511119	-1.88993	0.0391853	cytochrome P450, family 78, subfamily A, polypeptide 8 [Source:TAIR_LOCUS;Acc:AT1G01190]	CYP78A8	83045	84864	-1	1	TAIR Gene Name
AT1G01210	3.14843	3.23504	3.41194	3.26513	4.03907	3.56669	2.62833	3.41136	2.71556	3.19074	2.75971	2.88867	0.146231	0.91509	-0.376466	0.70545	DNA-directed RNA polymerase, subunit M, archaeal [Source:TAIR_LOCUS;Acc:AT1G01210]	F6F3.2	88898	89745	1	1	UniProtKB Gene Name
AT1G01220	5.15887	5.09403	5.34653	5.19981	4.96975	4.49688	5.29098	4.9192	4.85147	4.94182	5.28532	5.0262	-0.280609	0.680518	-0.17361	0.834905	L-fucokinase/GDP-L-fucose pyrophosphorylase [Source:TAIR_LOCUS;Acc:AT1G01220]	FKGP	91376	95651	1	1	TAIR Gene Name
AT1G01225	1.82372	0.308446	1.37489	1.16902	0.424103	0.300826	0.440666	0.388532	-0.189099	-1.13436	-0.417731	-0.580395	-0.780488	0.197391	-1.74941	0.00375325	NC domain-containing protein-related [Source:TAIR_LOCUS;Acc:AT1G01225]		95987	97407	1	1
AT1G01230	5.28003	4.88164	5.63295	5.26487	5.30443	4.95356	5.08152	5.11317	4.98004	4.88352	5.15756	5.00704	-0.151702	0.780892	-0.257837	0.543837	ORMDL family protein [Source:TAIR_LOCUS;Acc:AT1G01230]	F6F3.4	97456	99240	1	1	UniProtKB Gene Name
AT1G01240	6.52631	5.18789	6.84299	6.18573	6.6756	5.38784	6.86755	6.31033	6.43818	5.0263	6.66021	6.04156	0.124596	0.863724	-0.144167	0.835321	unknown protein; INVOLVED IN: N-terminal protein myristoylation; EXPRESSED IN: 17 plant structures; EXPRESSED DURING: 11 growth stages; BEST Arabidopsis thaliana protein match is: unknown protein (TAIR:AT2G46550.1); Has 95 Blast hits to 78 proteins /.../species: Archae - 0; Bacteria - 2; Metazoa - 11; Fungi - 0; Plants - 80; Viruses - 0; Other Eukaryotes - 2 (source: NCBI BLink). [Source:TAIR_LOC…	F633.5	99894	101834	1	3	UniProtKB Gene Name
AT1G01250	1.88569	4.19059	2.49595	2.85741	1.52765	3.37576	2.63891	2.51411	1.91005	2.51325	1.42928	1.95086	-0.343303	0.824498	-0.906549	0.359266	Integrase-type DNA-binding superfamily protein [Source:TAIR_LOCUS;Acc:AT1G01250]	ERF023	104491	105330	-1	1	UniProtKB Gene Name
AT1G01260	3.82721	3.93367	4.17978	3.98022	2.85604	3.69046	4.21691	3.5878	3.70516	3.88415	4.38605	3.99178	-0.392417	0.60748	0.0115666	0.993231	basic helix-loop-helix (bHLH) DNA-binding superfamily protein [Source:TAIR_LOCUS;Acc:AT1G01260]	BHLH13/MYC7E/AtbHLH13	108946	111609	1	3	UniProtKB Gene Name
AT1G01290	4.13487	4.06435	4.65463	4.28462	4.64379	3.8947	3.83571	4.12473	4.09081	4.22748	3.91538	4.07789	-0.159889	0.851754	-0.20673	0.79084	cofactor of nitrate reductase and xanthine dehydrogenase 3 [Source:TAIR_LOCUS;Acc:AT1G01290]	CNX3	114286	116108	1	2	TAIR Gene Name
AT1G01300	4.55698	6.71477	5.31831	5.53002	5.14777	6.22693	4.68663	5.35377	5.28021	6.34439	5.10184	5.57548	-0.176243	0.857835	0.0454616	0.97046	Eukaryotic aspartyl protease family protein [Source:TAIR_LOCUS;Acc:AT1G01300]	F6F3.10	116943	118764	1	1	UniProtKB Gene Name
AT1G01320	8.21523	8.90752	7.78493	8.30256	7.94696	8.12172	9.0643	8.37766	8.17468	8.68244	8.81043	8.55585	0.0750987	0.954772	0.25329	0.799711	Tetratricopeptide repeat (TPR)-like superfamily protein [Source:TAIR_LOCUS;Acc:AT1G01320]	AT1G01320	121067	130577	-1	2	UniProtKB Gene Name
AT1G01340	3.04359	3.57914	1.55478	2.72584	2.30667	3.33756	2.49495	2.71306	3.768	4.0158	4.29313	4.02565	-0.0127789	0.994942	1.29981	0.111598	cyclic nucleotide gated channel 10 [Source:TAIR_LOCUS;Acc:AT1G01340]	ATCNGC10	132328	135831	-1	2	TAIR Gene Name
AT1G01350	4.2369	4.20182	4.81653	4.41842	5.13987	4.23063	4.06261	4.4777	4.42902	4.36269	4.0871	4.29294	0.0592874	0.959409	-0.125479	0.903654	Zinc finger (CCCH-type/C3HC4-type RING finger) family protein [Source:TAIR_LOCUS;Acc:AT1G01350]	AT1G01350	136124	138162	1	1	UniProtKB Gene Name
AT1G01360	3.98519	5.06104	3.82781	4.29135	3.55736	4.69655	3.88315	4.04569	3.83658	4.55809	3.60598	4.00022	-0.245659	0.694071	-0.291126	0.612918	regulatory component of ABA receptor 1 [Source:TAIR_LOCUS;Acc:AT1G01360]	RCAR1	141971	143183	1	1	TAIR Gene Name
AT1G01370	0.425103	-2.18026	1.21315	-0.180669	0.0360176	-0.602444	-1.40779	-0.658072	-0.189099	-0.808465	0.236992	-0.253524	-0.477404	0.826501	-0.0728553	0.980092	Histone superfamily protein [Source:TAIR_LOCUS;Acc:AT1G01370]	HTR12	143564	145684	1	2	TAIR Gene Name
AT1G01390	2.13932	1.96288	0.737474	1.61322	2.77859	2.0764	2.30873	2.38791	2.6304	2.46458	1.92683	2.3406	0.774683	0.223434	0.727379	0.262924	UDP-Glycosyltransferase superfamily protein [Source:TAIR_LOCUS;Acc:AT1G01390]	UGT72B2	148120	149806	-1	1	UniProtKB Gene Name
AT1G01420	3.0358	4.7106	2.9183	3.5549	3.02864	4.51261	3.78903	3.77676	3.6322	4.74825	3.50746	3.96263	0.22186	0.827336	0.407734	0.600367	UDP-glucosyl transferase 72B3 [Source:TAIR_LOCUS;Acc:AT1G01420]	UGT72B3	154492	156011	-1	1	TAIR Gene Name
AT1G01430	5.82364	5.09318	6.06577	5.66086	6.00114	4.56291	6.117	5.56035	5.87967	4.81027	5.94694	5.54563	-0.100508	0.91702	-0.115236	0.901664	TRICHOME BIREFRINGENCE-LIKE 25 [Source:TAIR_LOCUS;Acc:AT1G01430]	TBL25	156801	158655	-1	1	TAIR Gene Name
AT1G01440	4.74784	4.75041	4.48179	4.66001	4.12302	4.17593	4.93927	4.41274	4.85249	4.48986	4.74955	4.6973	-0.247271	0.778821	0.0372885	0.976335	Protein of unknown function (DUF3133) [Source:TAIR_LOCUS;Acc:AT1G01440]	F6F3.24	159856	162572	-1	1	UniProtKB Gene Name
AT1G01448	4.18503	4.41256	3.60776	4.06845	3.3915	3.74005	4.19917	3.77691	4.27454	4.11932	4.1938	4.19589	-0.291541	0.74561	0.127441	0.913876	other RNA [Source:TAIR_LOCUS;Acc:AT1G01448]		163419	166239	1	3
AT1G01470	7.94222	9.26882	9.57852	8.92985	8.82536	9.22127	9.32616	9.12426	8.45219	8.34587	8.75504	8.5177	0.194411	0.792128	-0.412151	0.424809	Late embryogenesis abundant protein [Source:TAIR_LOCUS;Acc:AT1G01470]	LEA14	172146	172948	-1	1	TAIR Gene Name
AT1G01480	-2.79348	-1.36763	-2.77365	-2.31159	-0.00149531	3.01306	1.01285	1.34147	2.43195	1.32265	3.24227	2.33229	3.65306	0.0471675	4.64388	0.0128481	1-amino-cyclopropane-1-carboxylate synthase 2 [Source:TAIR_LOCUS;Acc:AT1G01480]	ACS2	175782	178400	1	2	TAIR Gene Name
AT1G01490	5.68797	5.34319	6.24138	5.75751	6.86159	5.60799	5.80488	6.09149	6.427	6.06517	6.2276	6.23993	0.333973	0.664168	0.482413	0.450775	Heavy metal transport/detoxification superfamily protein [Source:TAIR_LOCUS;Acc:AT1G01490]	F22L4.5	180059	182358	-1	2	UniProtKB Gene Name
AT1G01500	4.37603	5.24464	4.92211	4.84759	5.19427	5.19195	5.07668	5.1543	5.07004	5.20378	5.14025	5.13802	0.306705	0.513125	0.290431	0.547119	Erythronate-4-phosphate dehydrogenase family protein [Source:TAIR_LOCUS;Acc:AT1G01500]		185133	186923	1	1
AT1G01510	4.68075	4.41944	4.16277	4.42099	4.26749	4.43968	4.60952	4.4389	4.65229	4.3784	4.59205	4.54091	0.0179074	0.981139	0.119927	0.834392	NAD(P)-binding Rossmann-fold superfamily protein [Source:TAIR_LOCUS;Acc:AT1G01510]	AN	187211	190056	1	1	TAIR Gene Name
AT1G01540	5.70893	6.07797	6.34325	6.04339	5.64064	5.63816	6.02146	5.76675	5.69036	5.62947	5.67765	5.66582	-0.276633	0.512034	-0.377562	0.3013	Protein kinase superfamily protein [Source:TAIR_LOCUS;Acc:AT1G01540]	AT1G01540	195780	198684	1	2	UniProtKB Gene Name
AT1G01550	7.87246	7.64813	7.07935	7.53331	7.39225	7.33033	7.90934	7.54398	7.93035	7.72462	7.92331	7.85943	0.0106636	0.993269	0.326115	0.663746	Protein of unknown function (DUF793) [Source:TAIR_LOCUS;Acc:AT1G01550]	BPS1	199639	201775	1	2	TAIR Gene Name
AT1G01560	3.37829	1.00224	3.15777	2.51277	3.19589	3.02113	2.92475	3.04726	4.12882	2.24572	3.31694	3.23049	0.534489	0.773971	0.717724	0.659939	MAP kinase 11 [Source:TAIR_LOCUS;Acc:AT1G01560]	ATMPK11	202136	204335	1	2	TAIR Gene Name
AT1G01570	0.0760776	0.531334	0.16579	0.257734	0.210381	1.97995	1.87076	1.35369	0.153548	-0.187436	-0.278388	-0.104092	1.09596	0.0510729	-0.361826	0.665357	Protein of unknown function (DUF604) [Source:TAIR_LOCUS;Acc:AT1G01570]	F22L4.11	205176	207435	1	1	UniProtKB Gene Name
AT1G01580	1.50065	1.15712	-0.070894	0.86229	0.0360176	1.46541	1.75877	1.08673	1.30534	1.5365	1.02659	1.28948	0.224439	0.948035	0.427185	0.887323	ferric reduction oxidase 2 [Source:TAIR_LOCUS;Acc:AT1G01580]	FRO2	209395	213041	1	1	TAIR Gene Name
AT1G01610	4.20253	5.49049	5.58947	5.09416	5.4256	5.22695	5.39583	5.34946	5.18103	5.02464	4.91923	5.04164	0.255298	0.880833	-0.0525285	0.979997	glycerol-3-phosphate acyltransferase 4 [Source:TAIR_LOCUS;Acc:AT1G01610]	ATGPAT4	221691	224340	-1	1	TAIR Gene Name
AT1G01620	6.73222	4.91703	8.18289	6.61071	7.38764	4.31304	7.52282	6.40783	6.83873	4.14253	7.46767	6.14965	-0.202878	0.886716	-0.461066	0.65852	plasma membrane intrinsic protein 1C [Source:TAIR_LOCUS;Acc:AT1G01620]	PIP1C/PIP1;3/TMP-B	225665	227302	-1	2	TAIR Gene Name
AT1G01630	5.62317	5.95386	5.44242	5.67315	5.68806	6.09729	5.65697	5.8141	6.03159	6.16516	5.70281	5.96652	0.140957	0.847177	0.293373	0.582806	Sec14p-like phosphatidylinositol transfer family protein [Source:TAIR_LOCUS;Acc:AT1G01630]	T1N6.1	229013	230917	1	1	UniProtKB Gene Name
AT1G01640	1.3828	2.18133	1.53775	1.70063	2.1319	2.83678	2.07938	2.34936	2.77405	3.02324	2.80714	2.86814	0.648727	0.071563	1.16752	0.00248737	BTB/POZ domain-containing protein [Source:TAIR_LOCUS;Acc:AT1G01640]		230994	232508	-1	2
AT1G01650	5.60815	5.96372	5.74842	5.77343	5.36191	5.82866	6.28719	5.82592	5.88466	5.82305	6.36121	6.02297	0.0524887	0.963552	0.249541	0.756637	SIGNAL PEPTIDE PEPTIDASE-LIKE 4 [Source:TAIR_LOCUS;Acc:AT1G01650]	SPPL4	232841	237817	-1	2	TAIR Gene Name
AT1G01660	0.763644	0.489441	0.548276	0.600453	1.05927	0.922031	0.783888	0.921729	0.234288	0.93395	0.29758	0.488606	0.321276	0.695471	-0.111847	0.922958	RING/U-box superfamily protein [Source:TAIR_LOCUS;Acc:AT1G01660]	PUB55	240057	242608	-1	1	UniProtKB Gene Name
AT1G01670	2.37978	2.05857	1.58825	2.00887	1.91301	2.09954	1.82515	1.9459	1.51187	2.46953	2.04603	2.00914	-0.0629679	0.937467	0.000276917	0.999689	RING/U-box superfamily protein [Source:TAIR_LOCUS;Acc:AT1G01670]	PUB56	242843	245988	-1	1	UniProtKB Gene Name
AT1G01680	0.192728	-1.22035	-0.292334	-0.439984	3.0045	1.46541	1.18168	1.88386	2.07036	1.40792	1.60697	1.69508	2.32385	0.0282629	2.13507	0.0436326	plant U-box 54 [Source:TAIR_LOCUS;Acc:AT1G01680]	ATPUB54	246411	248367	-1	1	TAIR Gene Name
AT1G01690	2.0338	2.12126	1.44952	1.86819	1.82848	1.50068	0.622471	1.31721	1.06374	1.77155	0.29758	1.04429	-0.550981	0.270026	-0.823901	0.0701803	putative recombination initiation defects 3 [Source:TAIR_LOCUS;Acc:AT1G01690]	ATPRD3	249141	252462	1	1	TAIR Gene Name
AT1G01710	5.3508	5.55167	5.79872	5.56707	5.74449	5.62708	5.7017	5.69109	5.72862	5.73029	5.72958	5.7295	0.124024	0.79157	0.162429	0.697053	Acyl-CoA thioesterase family protein [Source:TAIR_LOCUS;Acc:AT1G01710]	AT1G01710/T1N6_21	262828	267771	1	1	UniProtKB Gene Name
AT1G01720	2.93473	4.40564	3.18582	3.50873	4.07229	5.45279	4.26032	4.59513	4.54438	4.76127	4.51505	4.6069	1.0864	0.150288	1.09817	0.144951	NAC (No Apical Meristem) domain transcriptional regulator superfamily protein [Source:TAIR_LOCUS;Acc:AT1G01720]	ATAF1	268330	269819	1	1	TAIR Gene Name
AT1G01725	3.13391	2.80282	3.24036	3.05903	2.7441	3.17003	2.8264	2.91351	2.78721	3.11416	2.98722	2.96287	-0.14552	0.850714	-0.0961651	0.91135	unknown protein; FUNCTIONS IN: molecular_function unknown; INVOLVED IN: biological_process unknown; LOCATED IN: endomembrane system; EXPRESSED IN: 23 plant structures; EXPRESSED DURING: 14 growth stages; BEST Arabidopsis thaliana protein match is: u /.../ protein (TAIR:AT4G00530.1); Has 20 Blast hits to 20 proteins in 7 species: Archae - 0; Bacteria - 0; Metazoa - 0; Fungi - 0; Plants - 20; Virus…	T1N6.13	269792	270775	-1	1	UniProtKB Gene Name
AT1G01730	3.61884	4.28414	3.93158	3.94485	4.21524	4.76852	4.26203	4.41526	4.60669	4.76226	4.75357	4.70751	0.470412	0.252551	0.762658	0.0424808	unknown protein; FUNCTIONS IN: molecular_function unknown; INVOLVED IN: biological_process unknown; LOCATED IN: chloroplast; EXPRESSED IN: 23 plant structures; EXPRESSED DURING: 13 growth stages; Has 42 Blast hits to 42 proteins in 17 species: Archa /.../ Bacteria - 2; Metazoa - 5; Fungi - 1; Plants - 34; Viruses - 0; Other Eukaryotes - 0 (source: NCBI BLink). [Source:TAIR_LOCUS;Acc:AT1G01730]	T1N6.14	270956	272061	1	1	UniProtKB Gene Name
AT1G01740	3.27622	3.99958	2.53979	3.27186	2.78426	3.44327	3.04492	3.09081	3.52958	3.5572	3.59403	3.56027	-0.18105	0.832424	0.288405	0.682602	Protein kinase protein with tetratricopeptide repeat domain [Source:TAIR_LOCUS;Acc:AT1G01740]		272111	274569	-1	2
AT1G01760	2.16096	1.63987	0.956837	1.58589	0.77589	0.83236	1.87076	1.15967	1.37756	0.962472	1.50813	1.28272	-0.426221	0.782221	-0.303168	0.861687	adenosine deaminases;RNA binding;RNA binding;adenosine deaminases [Source:TAIR_LOCUS;Acc:AT1G01760]		276266	278448	-1	1
AT1G01770	4.34957	4.28414	3.47713	4.03695	3.33046	3.74492	5.07862	4.05133	4.65936	4.40037	5.08491	4.71488	0.0143847	0.995113	0.677934	0.6017	unknown protein; CONTAINS InterPro DOMAIN/s: Protein of unknown function DUF1446 (InterPro:IPR010839); Has 1597 Blast hits to 1509 proteins in 306 species: Archae - 4; Bacteria - 843; Metazoa - 22; Fungi - 131; Plants - 31; Viruses - 0; Other Eukary /.../ 566 (source: NCBI BLink). [Source:TAIR_LOCUS;Acc:AT1G01770]	AT1G01770/T1N6_13	278615	282891	1	1	UniProtKB Gene Name
AT1G01780	2.69865	3.45014	4.36487	3.50455	4.07229	3.79269	3.55795	3.80764	3.80912	3.69369	3.65857	3.72046	0.30309	0.791348	0.215907	0.866778	GATA type zinc finger transcription factor family protein [Source:TAIR_LOCUS;Acc:AT1G01780]	AT1G01780	282761	284245	1	1	UniProtKB Gene Name
AT1G01790	8.11552	7.7576	7.80474	7.89262	6.65406	6.7803	7.62707	7.02048	6.82593	6.9934	7.14105	6.98679	-0.872142	0.0915967	-0.905827	0.0782045	K+ efflux antiporter 1 [Source:TAIR_LOCUS;Acc:AT1G01790]	KEA1	284610	291094	1	1	TAIR Gene Name
AT1G01800	6.11501	5.53851	6.34454	5.99935	6.13826	5.85568	5.7705	5.92148	5.77827	5.58134	5.88846	5.74936	-0.0778757	0.923195	-0.249998	0.646035	NAD(P)-binding Rossmann-fold superfamily protein [Source:TAIR_LOCUS;Acc:AT1G01800]	AT1G01800	293342	295040	1	2	UniProtKB Gene Name
AT1G01820	6.28523	6.57014	7.10595	6.65377	7.27488	6.51173	6.40543	6.73068	6.69455	6.70314	6.8641	6.75393	0.0769083	0.946432	0.100156	0.92681	peroxin 11c [Source:TAIR_LOCUS;Acc:AT1G01820]	PEX11C	296001	298120	-1	1	TAIR Gene Name
AT1G01830	3.43565	4.98252	4.34486	4.25434	4.8861	4.89486	4.44923	4.74339	4.63686	4.93565	4.38432	4.65227	0.489051	0.392839	0.397932	0.529858	ARM repeat superfamily protein [Source:TAIR_LOCUS;Acc:AT1G01830]	T1N6.25	298535	302315	-1	3	UniProtKB Gene Name
AT1G01860	4.37603	4.08184	4.45867	4.30552	4.10478	3.78798	4.27732	4.05669	4.12882	3.96806	4.0128	4.03656	-0.248821	0.655051	-0.268956	0.615972	Ribosomal RNA adenine dimethylase family protein [Source:TAIR_LOCUS;Acc:AT1G01860]	PFC1	304133	306287	-1	1	TAIR Gene Name
AT1G01900	1.41918	0.401795	2.31624	1.37907	1.07756	1.1319	1.96629	1.39192	0.717842	-0.760688	0.915145	0.290766	0.0128463	0.993618	-1.0883	0.0911499	subtilase family protein [Source:TAIR_LOCUS;Acc:AT1G01900]	ATSBT1.1	310316	313130	1	1	TAIR Gene Name
AT1G01910	5.67549	5.27674	5.52681	5.49301	5.27379	5.46528	5.56933	5.43614	5.46734	5.35379	5.69864	5.50659	-0.0568735	0.922974	0.0135822	0.983418	P-loop containing nucleoside triphosphate hydrolases superfamily protein [Source:TAIR_LOCUS;Acc:AT1G01910]	F22M8.4	313101	315902	-1	5	UniProtKB Gene Name
AT1G01920	4.15838	4.6499	3.40717	4.07181	3.50989	4.2999	3.60183	3.80388	3.68436	4.41695	3.66715	3.92282	-0.267939	0.749175	-0.148993	0.885186	SET domain-containing protein [Source:TAIR_LOCUS;Acc:AT1G01920]		316128	319650	1	2
AT1G01930	3.59253	3.76407	3.75807	3.70489	4.14104	3.502	3.85623	3.83309	3.82397	3.69579	3.86408	3.79461	0.128198	0.824953	0.0897205	0.889386	zinc finger protein-related [Source:TAIR_LOCUS;Acc:AT1G01930]	F22M8.6	319836	322860	-1	1	UniProtKB Gene Name
AT1G01940	3.0397	3.89063	4.3549	3.76174	4.03426	3.98171	2.95468	3.65689	3.77676	3.9767	3.40854	3.72067	-0.104858	0.946637	-0.0410787	0.980326	Cyclophilin-like peptidyl-prolyl cis-trans isomerase family protein [Source:TAIR_LOCUS;Acc:AT1G01940]	F22M8.7	323027	324917	1	1	UniProtKB Gene Name
AT1G01950	3.60837	4.0905	3.08817	3.59568	2.96002	3.65986	3.79848	3.47279	3.44677	3.85442	3.86904	3.72341	-0.122895	0.874927	0.127728	0.868868	armadillo repeat kinesin 2 [Source:TAIR_LOCUS;Acc:AT1G01950]	ARK2	325379	330619	1	3	TAIR Gene Name
AT1G01960	6.60442	6.52083	4.79817	5.97447	4.71958	5.60534	6.80484	5.70992	6.37679	6.3722	6.95455	6.56785	-0.264551	0.910816	0.593375	0.74319	SEC7-like guanine nucleotide exchange family protein [Source:TAIR_LOCUS;Acc:AT1G01960]	EDA10	330588	337582	-1	1	TAIR Gene Name
AT1G01970	4.94682	4.63461	4.91189	4.8311	4.96466	4.50262	4.66741	4.71156	4.37124	4.34013	4.2154	4.30892	-0.119541	0.901177	-0.522184	0.322504	Tetratricopeptide repeat (TPR)-like superfamily protein [Source:TAIR_LOCUS;Acc:AT1G01970]		338291	340077	1	1
AT1G01990	4.15478	4.76235	4.81835	4.5785	4.78011	4.33896	4.61488	4.57798	4.62727	4.61441	4.46843	4.57004	-0.000513861	0.999526	-0.00845967	0.993231	unknown protein; Has 32 Blast hits to 32 proteins in 6 species: Archae - 0; Bacteria - 0; Metazoa - 0; Fungi - 0; Plants - 32; Viruses - 0; Other Eukaryotes - 0 (source: NCBI BLink). [Source:TAIR_LOCUS;Acc:AT1G01990]	F22M8.12	343166	344341	-1	1	UniProtKB Gene Name
AT1G02000	2.36742	3.38102	3.43555	3.06133	3.16568	3.19163	3.25881	3.20537	3.35593	3.26343	3.09303	3.23746	0.144042	0.872895	0.176129	0.835225	UDP-D-glucuronate 4-epimerase 2 [Source:TAIR_LOCUS;Acc:AT1G02000]	GAE2	345812	347592	1	1	TAIR Gene Name
AT1G02010	3.73402	3.83805	2.7337	3.43526	2.33771	3.06081	3.52414	2.97422	3.12063	3.36731	3.34575	3.2779	-0.461036	0.719812	-0.15736	0.929996	secretory 1A [Source:TAIR_LOCUS;Acc:AT1G02010]	SEC1A	347891	352480	1	2	TAIR Gene Name
AT1G02020	3.42972	4.79866	3.95148	4.05995	3.90072	4.31794	4.37218	4.19694	4.17742	4.48624	4.3005	4.32139	0.136992	0.872782	0.261434	0.695962	nitroreductase family protein [Source:TAIR_LOCUS;Acc:AT1G02020]	T7I23.2	352637	354969	-1	2	UniProtKB Gene Name
AT1G02050	1.05317	2.78576	2.70311	2.18068	2.84522	2.79971	2.36079	2.66857	2.57066	2.46458	2.49578	2.51034	0.487892	0.516876	0.329663	0.717253	Chalcone and stilbene synthase family protein [Source:TAIR_LOCUS;Acc:AT1G02050]	LAP6	359117	360518	-1	1	TAIR Gene Name
AT1G02060	2.13203	2.44889	0.479357	1.68676	1.26493	1.60156	2.48911	1.7852	2.14765	2.35666	2.62499	2.37643	0.0984421	0.968974	0.689672	0.659863	Tetratricopeptide repeat (TPR)-like superfamily protein [Source:TAIR_LOCUS;Acc:AT1G02060]		360918	363094	-1	1
AT1G02080	7.08247	7.15224	5.08274	6.43915	5.39172	6.24064	7.41944	6.3506	6.71637	7.03603	7.38745	7.04662	-0.0885461	0.975419	0.60747	0.755943	transcription regulators [Source:TAIR_LOCUS;Acc:AT1G02080]	AT1G02080	373335	386847	1	2	UniProtKB Gene Name
AT1G02090	4.41107	4.92864	5.92811	5.08927	5.91651	5.21305	4.53089	5.22015	4.56963	4.87525	4.46516	4.63668	0.130877	0.942374	-0.452593	0.717855	Proteasome component (PCI) domain protein [Source:TAIR_LOCUS;Acc:AT1G02090]	FUS5	387277	389647	-1	3	TAIR Gene Name
AT1G02100	5.14174	5.48658	5.7231	5.45047	5.79594	5.33752	5.01317	5.38221	5.52485	5.69591	5.40436	5.54171	-0.0682629	0.945358	0.0912314	0.922656	Leucine carboxyl methyltransferase [Source:TAIR_LOCUS;Acc:AT1G02100]	T7I23.16	389812	392816	1	3	UniProtKB Gene Name
AT1G02110	1.88569	3.4927	3.72384	3.03408	3.67587	2.60382	2.96733	3.08234	3.12753	3.02993	2.85808	3.00518	0.0482623	0.975849	-0.0288988	0.985459	Protein of unknown function (DUF630 and DUF632) [Source:TAIR_LOCUS;Acc:AT1G02110]		392831	395528	1	1
AT1G02120	6.78689	6.84716	7.16621	6.93342	7.22843	6.65533	6.76237	6.88204	6.79183	6.89854	6.86348	6.85129	-0.0513795	0.947229	-0.082135	0.907727	GRAM domain family protein [Source:TAIR_LOCUS;Acc:AT1G02120]	VAD1	395761	399897	1	1	TAIR Gene Name
AT1G02130	5.37724	5.31109	5.19683	5.29505	5.22766	5.41083	5.28595	5.30815	5.29609	5.36103	5.24303	5.30005	0.0130945	0.983766	0.00499294	0.994131	RAS 5 [Source:TAIR_LOCUS;Acc:AT1G02130]	ATRAB1B	400035	401882	-1	1	TAIR Gene Name
AT1G02140	6.39737	6.40515	7.41976	6.74076	7.34968	6.76411	6.25284	6.78888	6.32476	6.52509	6.30988	6.38658	0.0481145	0.979762	-0.354185	0.790259	mago nashi family protein [Source:TAIR_LOCUS;Acc:AT1G02140]	MEE63	403190	404456	-1	1	TAIR Gene Name
AT1G02145	5.0577	4.87565	4.88253	4.93863	4.73756	4.50976	4.59332	4.61355	4.69419	4.77318	4.7183	4.72855	-0.325082	0.342774	-0.210074	0.620816	homolog of asparagine-linked glycosylation 12 [Source:TAIR_LOCUS;Acc:AT1G02145]	ALG12	404600	408619	1	4	TAIR Gene Name
AT1G02150	6.47827	6.23971	7.744	6.82066	7.53518	6.24234	6.75875	6.84542	6.52558	6.06115	6.40695	6.33123	0.0247642	0.986325	-0.489431	0.528508	Tetratricopeptide repeat (TPR)-like superfamily protein [Source:TAIR_LOCUS;Acc:AT1G02150]		408622	410611	1	1
AT1G02160	4.26881	4.17601	4.99011	4.47831	5.05729	4.28831	4.18662	4.51074	4.32742	4.45201	4.36689	4.38211	0.0324272	0.976698	-0.0962039	0.922434	Cox19 family protein (CHCH motif) [Source:TAIR_LOCUS;Acc:AT1G02160]		410748	411597	1	2
AT1G02170	4.22838	4.86058	5.61719	4.90205	5.60158	4.89049	4.64532	5.0458	5.24089	4.98255	5.10394	5.10913	0.143742	0.92212	0.207074	0.877877	metacaspase 1 [Source:TAIR_LOCUS;Acc:AT1G02170]	LOL3	411779	413554	1	1	TAIR Gene Name
AT1G02180	0.326413	0.446287	1.57161	0.781437	0.177132	1.08613	0.314168	0.525808	-0.377007	-0.584073	-0.111388	-0.357489	-0.255628	0.894233	-1.13893	0.271782	ferredoxin-related [Source:TAIR_LOCUS;Acc:AT1G02180]	AT1G02180/T6A9_2	413522	414645	-1	1	UniProtKB Gene Name
AT1G02205	5.04999	2.98189	5.48464	4.50551	4.66272	4.95982	7.47399	5.69884	3.36469	1.95234	4.59803	3.30502	1.19334	0.424391	-1.20048	0.420336	Fatty acid hydroxylase superfamily [Source:TAIR_LOCUS;Acc:AT1G02205]	CER1	418748	422438	1	3	TAIR Gene Name
AT1G02220	1.79633	0.424214	1.23437	1.15164	1.70366	4.38166	3.34204	3.14245	4.58705	4.57976	5.04934	4.73871	1.99082	0.0741791	3.58708	0.00261377	NAC domain containing protein 3 [Source:TAIR_LOCUS;Acc:AT1G02220]	ANAC003	428814	430647	-1	1	TAIR Gene Name
AT1G02230	2.64334	-0.69815	2.68758	1.54426	0.798056	0.612808	0.511557	0.640807	1.75666	1.87976	1.88807	1.8415	-0.903448	0.480825	0.29724	0.884028	NAC domain containing protein 4 [Source:TAIR_LOCUS;Acc:AT1G02230]	ANAC004	435174	436776	-1	1	TAIR Gene Name
AT1G02260	4.91533	4.7902	4.32458	4.6767	3.7033	4.37071	4.83522	4.30307	4.46986	4.8483	5.14434	4.82083	-0.373628	0.712435	0.144131	0.917586	Divalent ion symporter [Source:TAIR_LOCUS;Acc:AT1G02260]	T7I23.21	440441	442877	-1	1	UniProtKB Gene Name
AT1G02270	5.68921	6.00662	5.88741	5.86108	5.99106	5.82639	5.37546	5.73097	5.26338	5.82638	5.28439	5.45805	-0.130107	0.902757	-0.403029	0.558241	Calcium-binding endonuclease/exonuclease/phosphatase family [Source:TAIR_LOCUS;Acc:AT1G02270]		443149	446235	-1	1
AT1G02280	5.50049	4.54811	6.15255	5.40038	6.13024	4.87511	5.12817	5.37784	5.04605	4.6287	5.15655	4.94377	-0.0225438	0.990749	-0.456615	0.707782	translocon at the outer envelope membrane of chloroplasts 33 [Source:TAIR_LOCUS;Acc:AT1G02280]	TOC33	448463	450426	-1	2	TAIR Gene Name
AT1G02290	3.60837	3.61568	3.20788	3.47731	3.24627	2.96367	3.43899	3.21631	3.24313	3.52685	3.12248	3.29749	-0.261002	0.69	-0.179827	0.814731	unknown protein; BEST Arabidopsis thaliana protein match is: unknown protein (TAIR:AT3G45830.1); Has 134 Blast hits to 134 proteins in 37 species: Archae - 0; Bacteria - 0; Metazoa - 54; Fungi - 0; Plants - 78; Viruses - 0; Other Eukaryotes - 2 (sou /.../CBI BLink). [Source:TAIR_LOCUS;Acc:AT1G02290]	AT1G02290	450527	452737	-1	1	UniProtKB Gene Name
AT1G02300	6.53532	5.9344	6.35797	6.2759	6.83662	5.67341	6.24207	6.2507	6.34364	5.9736	5.80445	6.04056	-0.0251973	0.977527	-0.235333	0.664953	Cysteine proteinases superfamily protein [Source:TAIR_LOCUS;Acc:AT1G02300]	T7I23.12	453288	455463	1	1	UniProtKB Gene Name
AT1G02305	6.47395	6.69691	6.93556	6.70214	7.63219	7.07308	7.3389	7.34806	7.25834	7.13869	7.41848	7.27184	0.645918	0.129669	0.569697	0.194034	Cysteine proteinases superfamily protein [Source:TAIR_LOCUS;Acc:AT1G02305]	AT1G02305	455688	458164	1	1	UniProtKB Gene Name
AT1G02310	-3.32402	-0.515715	-1.06037	-1.63337	-1.43005	4.38632	2.81712	1.92446	1.72021	1.89458	2.86307	2.15928	3.55783	0.0942109	3.79265	0.0719613	Glycosyl hydrolase superfamily protein [Source:TAIR_LOCUS;Acc:AT1G02310]	MAN1	458133	460696	-1	1	TAIR Gene Name
AT1G02330	4.22496	4.49437	4.75314	4.49083	5.11822	4.60353	4.48479	4.73552	4.56462	4.60777	4.44038	4.53759	0.244689	0.710663	0.0467634	0.962538	CONTAINS InterPro DOMAIN/s: Hepatocellular carcinoma-associated antigen 59 (InterPro:IPR010756); Has 1239 Blast hits to 998 proteins in 204 species: Archae - 4; Bacteria - 71; Metazoa - 421; Fungi - 109; Plants - 87; Viruses - 5; Other Eukaryotes - /.../ource: NCBI BLink). [Source:TAIR_LOCUS;Acc:AT1G02330]	T6A9.2	462075	463612	-1	1	UniProtKB Gene Name
AT1G02335	1.89433	-0.353883	3.02753	1.52266	2.2988	1.54639	0.287479	1.37756	0.859676	0.630258	1.91723	1.13572	-0.145102	0.96011	-0.386936	0.873702	germin-like protein subfamily 2 member 2 precursor [Source:TAIR_LOCUS;Acc:AT1G02335]	GL22	463855	464924	-1	1	TAIR Gene Name
AT1G02340	1.0837	0.18251	2.04019	1.10213	1.2326	0.0685184	3.3388	1.54664	2.12698	0.172743	3.80571	2.03514	0.444508	0.885178	0.933012	0.69011	basic helix-loop-helix (bHLH) DNA-binding superfamily protein [Source:TAIR_LOCUS;Acc:AT1G02340]	HFR1/FBI1/REP1/RSF1/AtbHLH26	465718	467844	-1	1	TAIR Gene Name
AT1G02350	1.85061	-0.108329	2.56548	1.43592	2.07788	0.130217	1.3197	1.17593	1.1762	-0.0099085	1.86829	1.01153	-0.259987	0.856379	-0.424393	0.720143	protoporphyrinogen oxidase-related [Source:TAIR_LOCUS;Acc:AT1G02350]		469818	470693	1	1
AT1G02360	1.26783	-0.0452529	2.72611	1.31623	2.44145	1.27474	1.01285	1.57635	2.94422	1.8723	1.79685	2.20445	0.260115	0.916764	0.888224	0.573625	Chitinase family protein [Source:TAIR_LOCUS;Acc:AT1G02360]	T6A9.5	471990	473160	-1	1	UniProtKB Gene Name
AT1G02370	3.05134	3.80891	2.66396	3.17474	3.79119	3.73761	2.94619	3.49166	3.21104	3.72279	2.94545	3.29309	0.316928	0.570382	0.118358	0.886448	Tetratricopeptide repeat (TPR)-like superfamily protein [Source:TAIR_LOCUS;Acc:AT1G02370]		474500	476511	1	1
AT1G02380	1.41918	0.424214	3.16343	1.66894	1.13108	1.51224	1.63733	1.42689	0.9575	0.594202	2.34669	1.29946	-0.242053	0.916351	-0.369474	0.857505	unknown protein; BEST Arabidopsis thaliana protein match is: unknown protein (TAIR:AT4G01960.1); Has 66 Blast hits to 66 proteins in 11 species: Archae - 0; Bacteria - 0; Metazoa - 0; Fungi - 0; Plants - 66; Viruses - 0; Other Eukaryotes - 0 (source /.../ BLink). [Source:TAIR_LOCUS;Acc:AT1G02380]	T6A9.7	477000	478971	1	1	UniProtKB Gene Name
AT1G02390	3.02404	4.50864	2.23343	3.25537	2.87211	4.73604	3.98606	3.86474	3.71431	3.93827	3.64994	3.76751	0.609364	0.629053	0.512135	0.708142	glycerol-3-phosphate acyltransferase 2 [Source:TAIR_LOCUS;Acc:AT1G02390]	ATGPAT2	480852	483292	1	1	TAIR Gene Name
AT1G02400	1.22738	-0.69815	0.737474	0.422234	2.49069	2.45659	2.83562	2.5943	3.15816	2.16871	3.61192	2.9796	2.17207	0.039552	2.55736	0.0162772	gibberellin 2-oxidase 6 [Source:TAIR_LOCUS;Acc:AT1G02400]	GA2OX6	486801	489577	1	1	TAIR Gene Name
AT1G02410	4.92273	4.14142	4.78331	4.61582	4.14551	4.11532	4.27394	4.17826	4.34364	4.24902	4.27643	4.2897	-0.437566	0.137071	-0.326126	0.311245	cytochrome c oxidase assembly protein CtaG / Cox11 family [Source:TAIR_LOCUS;Acc:AT1G02410]	COX11	490925	492926	1	1	UniProtKB Gene Name
AT1G02420	2.39203	2.49164	1.83159	2.23842	1.56719	1.99648	2.1025	1.88872	1.6828	2.43457	2.06352	2.0603	-0.349697	0.757345	-0.178124	0.89988	Pentatricopeptide repeat (PPR) superfamily protein [Source:TAIR_LOCUS;Acc:AT1G02420]		493683	495158	1	1
AT1G02450	3.34086	0.468026	4.86145	2.89011	2.61654	2.02093	1.64785	2.09511	1.34191	1.16001	-0.278388	0.741176	-0.795004	0.778412	-2.14893	0.230188	NIM1-interacting 1 [Source:TAIR_LOCUS;Acc:AT1G02450]	NIMIN1	497976	498516	-1	1	TAIR Gene Name
AT1G02460	2.79407	3.34662	1.90002	2.68024	2.81783	3.31806	1.04505	2.39365	2.40365	2.97898	1.69945	2.3607	-0.286589	0.814058	-0.319541	0.78395	Pectin lyase-like superfamily protein [Source:TAIR_LOCUS;Acc:AT1G02460]	T14P4.18	504673	507204	-1	1	UniProtKB Gene Name
AT1G02470	-0.344052	1.48923	-0.871172	0.0913363	1.13108	3.93142	3.73833	2.93361	3.21752	3.51024	3.95093	3.55957	2.84227	0.00961513	3.46823	0.00265822	Polyketide cyclase/dehydrase and lipid transport superfamily protein [Source:TAIR_LOCUS;Acc:AT1G02470]		511765	513624	-1	2
AT1G02475	6.32132	6.33497	5.92298	6.19309	5.64145	6.38951	6.48248	6.17115	6.00942	6.32276	6.18265	6.17161	-0.0219415	0.980748	-0.021481	0.981139	Polyketide cyclase/dehydrase and lipid transport superfamily protein [Source:TAIR_LOCUS;Acc:AT1G02475]		513843	515404	-1	1
AT1G02500	6.78108	8.04423	8.58178	7.80236	8.82226	8.2651	8.27808	8.45515	8.63253	8.34652	8.54627	8.50844	0.652782	0.598648	0.706076	0.553553	S-adenosylmethionine synthetase 1 [Source:TAIR_LOCUS;Acc:AT1G02500]	SAM1	518251	520437	1	2	TAIR Gene Name
AT1G02560	8.30617	8.7318	9.06314	8.70037	8.78585	8.7677	8.99205	8.84853	8.54243	8.7087	8.95824	8.73646	0.148162	0.800335	0.0360871	0.963344	nuclear encoded CLP protease 5 [Source:TAIR_LOCUS;Acc:AT1G02560]	CLPP5	537860	540109	1	1	TAIR Gene Name
AT1G02580	-6.49411	-4.97214	-5.99094	-5.81907	-0.662715	-0.879119	-0.898138	-0.813324	1.03419	0.919473	1.45605	1.13657	5.00574	0.00128395	6.95563	0.000104978	SET domain-containing protein [Source:TAIR_LOCUS;Acc:AT1G02580]	MEA	544783	549202	1	1	TAIR Gene Name
AT1G02610	5.31344	1.64937	4.96395	3.97558	5.79015	1.60156	4.76706	4.05292	5.5452	1.5646	4.35986	3.82322	0.0773394	0.959411	-0.152366	0.911993	RING/FYVE/PHD zinc finger superfamily protein [Source:TAIR_LOCUS;Acc:AT1G02610]	T14P4.10	553050	555994	-1	1	UniProtKB Gene Name
AT1G02640	1.19977	-0.964607	1.50309	0.579418	1.29656	-0.0634613	0.579124	0.604075	1.04904	-1.33009	1.81763	0.512192	0.0246571	0.988903	-0.0672258	0.969035	beta-xylosidase 2 [Source:TAIR_LOCUS;Acc:AT1G02640]	BXL2	564205	567769	1	1	TAIR Gene Name
AT1G02660	4.50433	2.61275	4.3574	3.82483	4.37818	4.32444	4.93285	4.54515	5.0945	2.56495	4.69056	4.11667	0.720329	0.477934	0.291846	0.847264	alpha/beta-Hydrolases superfamily protein [Source:TAIR_LOCUS;Acc:AT1G02660]	T14P4.6	571955	574981	-1	1	UniProtKB Gene Name
AT1G02680	3.33452	3.66299	4.52472	3.84075	4.76266	3.85025	3.38977	4.00089	3.74364	3.62927	3.41535	3.59609	0.160145	0.903333	-0.24466	0.83431	TBP-associated factor 13 [Source:TAIR_LOCUS;Acc:AT1G02680]	TAF13	580625	582310	1	1	TAIR Gene Name
AT1G02690	1.60959	1.47861	1.05531	1.38117	0.730525	2.0764	1.10738	1.30477	1.47946	2.11918	1.76511	1.78792	-0.076398	0.93975	0.40675	0.467913	importin alpha isoform 6 [Source:TAIR_LOCUS;Acc:AT1G02690]	IMPA-6	584260	587219	1	2	TAIR Gene Name
AT1G02720	2.93473	2.06567	2.59905	2.53315	2.19251	2.33855	2.60694	2.37933	2.41504	1.85725	2.35382	2.2087	-0.153816	0.862421	-0.324446	0.620411	galacturonosyltransferase 5 [Source:TAIR_LOCUS;Acc:AT1G02720]	GATL5	591826	594236	1	2	TAIR Gene Name
AT1G02730	2.25788	0.0731437	1.43121	1.25408	0.585322	0.5466	0.764672	0.632198	0.0970639	0.0176535	2.24309	0.785935	-0.62188	0.693123	-0.468143	0.792979	cellulose synthase-like D5 [Source:TAIR_LOCUS;Acc:AT1G02730]	ATCSLD5	594573	598657	-1	1	TAIR Gene Name
AT1G02740	3.746	3.94709	3.13494	3.60934	3.9803	3.87265	3.65226	3.83507	3.82608	3.86564	3.51382	3.73518	0.225725	0.635805	0.125837	0.836881	MRG family protein [Source:TAIR_LOCUS;Acc:AT1G02740]		599416	602038	-1	1
AT1G02750	3.88471	3.68837	3.80978	3.79428	3.89543	3.80904	3.32905	3.67784	3.78329	3.70207	3.45555	3.64697	-0.116444	0.801906	-0.147316	0.724573	Drought-responsive family protein [Source:TAIR_LOCUS;Acc:AT1G02750]	DI19-2	602497	604292	1	2	UniProtKB Gene Name
AT1G02770	-1.13629	0.925906	-5.99094	-2.06711	0.424103	1.32811	0.556952	0.769722	0.601366	1.85725	0.729907	1.06284	2.83683	0.0506909	3.12995	0.0310329	Protein of unknown function (DUF626) [Source:TAIR_LOCUS;Acc:AT1G02770]		604873	606693	-1	1
AT1G02780	7.80932	8.18122	10.0909	8.69381	10.5062	8.84812	8.60414	9.31949	8.46301	8.42421	8.57168	8.4863	0.625673	0.752419	-0.207518	0.939218	Ribosomal protein L19e family protein [Source:TAIR_LOCUS;Acc:AT1G02780]	emb2386	607808	609465	-1	1	TAIR Gene Name
AT1G02816	3.13755	2.48637	4.76264	3.46219	2.93981	2.60382	3.59098	3.04487	3.12753	2.81815	3.83392	3.25986	-0.417316	0.517962	-0.202321	0.822087	Protein of unknown function, DUF538 [Source:TAIR_LOCUS;Acc:AT1G02816]	F22D16.19	621461	622469	1	1	UniProtKB Gene Name
AT1G02820	3.60575	2.81548	3.54824	3.32316	4.56888	3.23733	3.67298	3.8264	3.01295	1.58304	2.16423	2.25341	0.503241	0.693906	-1.06975	0.2349	Late embryogenesis abundant 3 (LEA3) family protein [Source:TAIR_LOCUS;Acc:AT1G02820]	F22D16.18	623765	624475	-1	1	UniProtKB Gene Name
AT1G02840	5.9703	6.21123	7.34089	6.50747	7.10302	6.28925	6.24725	6.54651	6.28585	6.24559	6.36515	6.29886	0.0390333	0.980281	-0.208608	0.868822	RNA-binding (RRM/RBD/RNP motifs) family protein [Source:TAIR_LOCUS;Acc:AT1G02840]	SR1	626741	629819	1	3	TAIR Gene Name
AT1G02850	3.36902	5.65343	2.36571	3.79605	3.87409	5.64979	5.06596	4.86328	4.6792	5.78501	5.06346	5.17589	1.06723	0.244284	1.37983	0.108302	beta glucosidase 11 [Source:TAIR_LOCUS;Acc:AT1G02850]	BGLU11	630505	633259	1	5	TAIR Gene Name
AT1G02860	4.15118	3.91426	4.46796	4.1778	4.63902	4.02232	4.5037	4.38834	4.33924	3.71039	4.33497	4.1282	0.210541	0.822836	-0.0496025	0.967729	SPX (SYG1/Pho81/XPR1) domain-containing protein [Source:TAIR_LOCUS;Acc:AT1G02860]	NLA	635144	637262	1	2	TAIR Gene Name
AT1G02870	3.33452	4.1922	4.00643	3.84438	4.81301	4.52817	3.74078	4.36065	4.09606	4.30081	3.92017	4.10568	0.516269	0.444046	0.261295	0.779626	FUNCTIONS IN: molecular_function unknown; INVOLVED IN: biological_process unknown; EXPRESSED IN: 23 plant structures; EXPRESSED DURING: 13 growth stages; CONTAINS InterPro DOMAIN/s: Ribosome biogenesis protein Nop16 (InterPro:IPR019002); Has 104 Bla /.../s to 104 proteins in 57 species: Archae - 0; Bacteria - 0; Metazoa - 0; Fungi - 63; Plants - 35; Viruses - 0; Other Eukaryotes - 6 (source: NCBI…		637214	638677	-1	1
AT1G02880	4.81991	5.25542	4.54463	4.87332	4.3219	5.65877	4.42959	4.80342	4.68036	5.45988	4.44038	4.86021	-0.0699	0.90567	-0.0131147	0.984675	thiamin pyrophosphokinase1 [Source:TAIR_LOCUS;Acc:AT1G02880]	TPK1	642752	644903	-1	4	TAIR Gene Name
AT1G02890	6.52978	6.93639	5.82645	6.43087	5.79015	6.30523	6.69733	6.26424	6.48271	6.80513	6.68107	6.6563	-0.166635	0.8713	0.22543	0.808847	AAA-type ATPase family protein [Source:TAIR_LOCUS;Acc:AT1G02890]		645092	651907	-1	2
AT1G02910	6.01407	6.1414	6.61861	6.25802	6.21725	5.81209	6.02649	6.01861	5.79373	5.75691	5.76916	5.77327	-0.239415	0.653435	-0.484758	0.209697	tetratricopeptide repeat (TPR)-containing protein [Source:TAIR_LOCUS;Acc:AT1G02910]	LPA1	655577	658148	-1	1	TAIR Gene Name
AT1G02920	5.61274	4.66734	5.48464	5.25491	7.20794	5.91145	7.05636	6.72525	8.72469	8.02622	9.05574	8.60222	1.47034	0.0025741	3.34731	5.74301e-06	glutathione S-transferase 7 [Source:TAIR_LOCUS;Acc:AT1G02920]	ATGSTF7	658657	659771	-1	1	TAIR Gene Name
AT1G02930	6.16452	6.93092	6.03592	6.37712	7.95077	8.7726	7.62774	8.11703	8.93363	8.75491	9.47901	9.05585	1.73992	0.00790211	2.67873	0.000405566	glutathione S-transferase 6 [Source:TAIR_LOCUS;Acc:AT1G02930]	GSTF6	661177	662456	-1	2	TAIR Gene Name
AT1G02950	2.87487	0.0151663	3.50867	2.1329	2.20937	0.404241	0.175487	0.9297	1.52251	-0.251859	1.44273	0.90446	-1.2032	0.210531	-1.22844	0.198221	glutathione S-transferase F4 [Source:TAIR_LOCUS;Acc:AT1G02950]	ATGSTF4	665152	666452	-1	4	TAIR Gene Name
AT1G02960	5.05095	4.75476	4.72816	4.84463	4.33176	4.67004	4.53796	4.51325	4.68036	4.81316	4.59205	4.69519	-0.331371	0.444024	-0.149438	0.812189	unknown protein; BEST Arabidopsis thaliana protein match is: unknown protein (TAIR:AT1G02965.1); Has 83 Blast hits to 82 proteins in 37 species: Archae - 0; Bacteria - 2; Metazoa - 20; Fungi - 7; Plants - 29; Viruses - 0; Other Eukaryotes - 25 (sour /.../BI BLink). [Source:TAIR_LOCUS;Acc:AT1G02960]	AT1G02960/F22D16_4	666872	669837	-1	3	UniProtKB Gene Name
AT1G02990	5.36097	5.15207	4.08368	4.86557	3.7213	4.48822	5.44102	4.55018	4.82242	5.00459	5.17966	5.00222	-0.31539	0.844471	0.136649	0.944427	BEST Arabidopsis thaliana protein match is: CW-type Zinc Finger (TAIR:AT3G62900.1); Has 5847 Blast hits to 4410 proteins in 438 species: Archae - 17; Bacteria - 452; Metazoa - 2463; Fungi - 354; Plants - 306; Viruses - 11; Other Eukaryotes - 2244 (s /.../ NCBI BLink). [Source:TAIR_LOCUS;Acc:AT1G02990]		681396	687315	-1	3
AT1G03000	5.37183	5.16357	4.68089	5.0721	4.57887	4.67258	5.38255	4.878	5.12704	4.96363	5.19453	5.09507	-0.194097	0.860168	0.0229697	0.986927	peroxin 6 [Source:TAIR_LOCUS;Acc:AT1G03000]	PEX6	687890	692560	-1	1	TAIR Gene Name
AT1G03030	4.0848	4.0573	4.69285	4.27832	4.35902	4.16329	4.08017	4.20082	4.08906	4.20119	4.07427	4.12151	-0.0774928	0.931355	-0.156808	0.835816	P-loop containing nucleoside triphosphate hydrolases superfamily protein [Source:TAIR_LOCUS;Acc:AT1G03030]		701478	703864	1	1
AT1G03040	4.59059	5.82057	4.95899	5.12338	5.70275	5.76773	5.15048	5.54032	5.35212	5.91107	5.27136	5.51152	0.416937	0.340265	0.388131	0.389979	basic helix-loop-helix (bHLH) DNA-binding superfamily protein [Source:TAIR_LOCUS;Acc:AT1G03040]	BHLH7/AtbHLH7	703906	706631	-1	2	UniProtKB Gene Name
AT1G03055	2.98007	1.6775	1.52053	2.05937	1.92324	1.17627	2.01585	1.70512	1.41234	0.69976	0.107578	0.739893	-0.35425	0.755561	-1.31947	0.0560231	unknown protein; BEST Arabidopsis thaliana protein match is: unknown protein (TAIR:AT1G64680.1); Has 143 Blast hits to 143 proteins in 26 species: Archae - 0; Bacteria - 6; Metazoa - 0; Fungi - 0; Plants - 122; Viruses - 0; Other Eukaryotes - 15 (so /.../NCBI BLink). [Source:TAIR_LOCUS;Acc:AT1G03055]		710018	711803	-1	2
AT1G03060	6.06518	5.80025	4.98524	5.61689	4.67053	4.97123	6.3113	5.31769	5.46401	5.64838	6.3808	5.83106	-0.299206	0.853913	0.214172	0.904173	Beige/BEACH domain ;WD domain, G-beta repeat protein [Source:TAIR_LOCUS;Acc:AT1G03060]	SPI	712473	726891	-1	1	TAIR Gene Name
AT1G03080	6.3534	6.7883	6.92609	6.68926	6.39787	6.55243	7.07103	6.67378	6.41057	6.91039	7.04701	6.78932	-0.0154867	0.982122	0.100062	0.854816	kinase interacting (KIP1-like) family protein [Source:TAIR_LOCUS;Acc:AT1G03080]	F10O3.10	731611	738056	-1	1	UniProtKB Gene Name
AT1G03090	4.70183	4.34906	4.62997	4.56029	3.92427	3.77377	5.29348	4.33051	5.0945	4.38231	5.42384	4.96688	-0.229778	0.847605	0.406595	0.667428	methylcrotonyl-CoA carboxylase alpha chain, mitochondrial / 3-methylcrotonyl-CoA carboxylase 1 (MCCA) [Source:TAIR_LOCUS;Acc:AT1G03090]	MCCA	739679	744184	1	2	TAIR Gene Name
AT1G03100	2.23084	2.72889	1.69971	2.21982	2.09611	2.53209	2.32847	2.31889	1.98864	2.7097	1.8279	2.17542	0.0990773	0.940637	-0.0444001	0.975184	Pentatricopeptide repeat (PPR) superfamily protein [Source:TAIR_LOCUS;Acc:AT1G03100]		743885	746479	-1	1
AT1G03110	3.34086	2.02251	2.32627	2.56321	3.01421	2.26549	2.335	2.53823	2.57574	2.32972	2.61909	2.50818	-0.0249805	0.983317	-0.0550302	0.962477	Transducin/WD40 repeat-like superfamily protein [Source:TAIR_LOCUS;Acc:AT1G03110]	TRM82	749246	751963	1	1	TAIR Gene Name
AT1G03130	10.3311	8.3101	11.8172	10.1528	10.9745	7.8808	9.96013	9.60514	10.11	7.74428	9.34865	9.06766	-0.547642	0.662466	-1.08512	0.235092	photosystem I subunit D-2 [Source:TAIR_LOCUS;Acc:AT1G03130]	PSAD-2	753307	754198	-1	1	TAIR Gene Name
AT1G03140	4.91001	4.88064	5.56012	5.11693	5.6677	4.98562	5.19229	5.28187	5.49443	5.0395	5.46529	5.33307	0.164945	0.821638	0.216145	0.740408	splicing factor Prp18 family protein [Source:TAIR_LOCUS;Acc:AT1G03140]	F10O3.3	754371	756303	-1	1	UniProtKB Gene Name
AT1G03150	5.12164	3.3408	5.00462	4.48902	4.38198	3.86149	4.2958	4.17976	4.57588	3.71454	4.31875	4.20305	-0.309266	0.655775	-0.28597	0.691411	Acyl-CoA N-acyltransferases (NAT) superfamily protein [Source:TAIR_LOCUS;Acc:AT1G03150]		756414	758612	1	1
AT1G03160	6.77261	6.79828	6.91394	6.82828	6.51862	6.27684	6.80191	6.53246	6.41092	6.63924	6.44011	6.49676	-0.295822	0.688398	-0.331522	0.634554	FZO-like [Source:TAIR_LOCUS;Acc:AT1G03160]	FZL	761282	766158	1	2	TAIR Gene Name
AT1G03180	1.02197	-0.174306	0.677084	0.508249	0.904111	0.218057	0.416239	0.512802	0.717842	0.244417	0.915145	0.625801	0.00455321	0.996682	0.117552	0.88514	unknown protein; Has 36 Blast hits to 36 proteins in 15 species: Archae - 0; Bacteria - 0; Metazoa - 3; Fungi - 0; Plants - 33; Viruses - 0; Other Eukaryotes - 0 (source: NCBI BLink). [Source:TAIR_LOCUS;Acc:AT1G03180]	F15K9.21	773411	775344	1	2	UniProtKB Gene Name
AT1G03190	3.4533	3.65131	2.97714	3.36058	3.1124	3.4282	3.41766	3.31942	3.33228	3.68527	3.44227	3.48661	-0.0411626	0.955433	0.126024	0.827451	RAD3-like DNA-binding helicase protein [Source:TAIR_LOCUS;Acc:AT1G03190]	ATXPD	775527	780062	1	2	TAIR Gene Name
AT1G03210	4.85353	3.51351	5.89878	4.75527	4.96466	3.95469	4.22569	4.38168	4.31101	3.90966	4.65656	4.29241	-0.373592	0.734366	-0.462863	0.643486	Phenazine biosynthesis PhzC/PhzF protein [Source:TAIR_LOCUS;Acc:AT1G03210]	F15K9.19	782948	784240	1	1	UniProtKB Gene Name
AT1G03220	3.99124	2.22002	5.42927	3.88018	4.63263	4.07922	6.05188	4.92125	6.99958	5.14779	7.62879	6.59205	1.04107	0.262762	2.71188	0.00279657	Eukaryotic aspartyl protease family protein [Source:TAIR_LOCUS;Acc:AT1G03220]	F15K9.17	787122	788651	1	1	UniProtKB Gene Name
AT1G03230	2.34239	1.18357	4.16277	2.56291	3.80815	0.922031	3.74078	2.82365	4.62607	2.69713	4.74281	4.022	0.260748	0.826501	1.4591	0.02524	Eukaryotic aspartyl protease family protein [Source:TAIR_LOCUS;Acc:AT1G03230]	F15K9.16	790091	791592	1	1	UniProtKB Gene Name
AT1G03250	4.97458	4.97414	5.73289	5.22721	5.5461	5.06615	5.06596	5.22607	4.95733	4.87801	4.88294	4.9061	-0.00113789	0.99906	-0.321109	0.569162	unknown protein; Has 89 Blast hits to 89 proteins in 31 species: Archae - 0; Bacteria - 0; Metazoa - 31; Fungi - 0; Plants - 48; Viruses - 0; Other Eukaryotes - 10 (source: NCBI BLink). [Source:TAIR_LOCUS;Acc:AT1G03250]		793353	795376	-1	2
AT1G03260	3.03189	2.84459	3.72768	3.20139	3.48557	3.05296	3.04889	3.19581	3.02779	2.78686	3.03668	2.95044	-0.00558172	0.995365	-0.250942	0.654001	SNARE associated Golgi protein family [Source:TAIR_LOCUS;Acc:AT1G03260]	F15K9.14	795532	798463	-1	1	UniProtKB Gene Name
AT1G03270	1.877	1.37924	0.16579	1.14068	0.210381	1.27474	1.15242	0.87918	0.909427	0.798073	0.61566	0.774387	-0.261496	0.884605	-0.366289	0.82161	CBS domain-containing protein with a domain of unknown function (DUF21) [Source:TAIR_LOCUS;Acc:AT1G03270]	CBSDUF4	799191	802436	1	1	UniProtKB Gene Name
AT1G03280	5.24331	5.70928	5.77994	5.57751	5.92314	5.65236	5.46494	5.68015	5.49377	5.63923	5.40094	5.51131	0.102638	0.888787	-0.0661969	0.934506	Transcription factor TFIIE, alpha subunit [Source:TAIR_LOCUS;Acc:AT1G03280]	F15K9.12	803035	807066	1	1	UniProtKB Gene Name
AT1G03290	6.38746	6.28869	6.56764	6.4146	6.55947	6.35844	6.36311	6.42701	6.17741	6.49508	6.25477	6.30909	0.0124117	0.989628	-0.105511	0.894119	unknown protein; BEST Arabidopsis thaliana protein match is: unknown protein (TAIR:AT4G02880.2); Has 13587 Blast hits to 10183 proteins in 1114 species: Archae - 257; Bacteria - 2402; Metazoa - 5637; Fungi - 960; Plants - 675; Viruses - 54; Other Eu /.../es - 3602 (source: NCBI BLink). [Source:TAIR_LOCUS;Acc:AT1G03290]	F15K9.11	807361	810868	1	2	UniProtKB Gene Name
AT1G03300	2.34869	2.53316	3.52639	2.80274	2.15819	1.7747	2.73076	2.22122	2.22097	1.95234	2.98264	2.38532	-0.581527	0.615947	-0.417427	0.757114	DOMAIN OF UNKNOWN FUNCTION 724 1 [Source:TAIR_LOCUS;Acc:AT1G03300]	ATDUF1	811033	813086	-1	1	TAIR Gene Name
AT1G03310	7.06774	7.27278	6.34068	6.89373	6.27199	6.78701	7.18804	6.74901	6.22366	6.94426	6.41499	6.52764	-0.144721	0.931179	-0.366095	0.776441	debranching enzyme 1 [Source:TAIR_LOCUS;Acc:AT1G03310]	ISA2/DBE1	813471	816749	1	2	TAIR Gene Name
AT1G03330	4.75498	4.07487	5.1409	4.65691	5.13307	4.6802	4.35946	4.72424	4.33482	4.29392	4.40837	4.3457	0.0673284	0.947451	-0.311214	0.624222	Small nuclear ribonucleoprotein family protein [Source:TAIR_LOCUS;Acc:AT1G03330]	F15K9.7	817983	819563	-1	1	UniProtKB Gene Name
AT1G03340	2.88357	3.28132	2.45991	2.87493	2.52487	3.18087	3.18498	2.96358	3.19144	3.30809	3.05426	3.18459	0.0886415	0.912498	0.309661	0.537536	unknown protein; BEST Arabidopsis thaliana protein match is: unknown protein (TAIR:AT4G02920.1); Has 44 Blast hits to 41 proteins in 13 species: Archae - 0; Bacteria - 1; Metazoa - 0; Fungi - 0; Plants - 43; Viruses - 0; Other Eukaryotes - 0 (source /.../ BLink). [Source:TAIR_LOCUS;Acc:AT1G03340]	F15K9.6	819662	821317	1	1	UniProtKB Gene Name
AT1G03350	4.93325	5.42998	5.88037	5.41453	5.63582	5.52549	5.4327	5.53134	5.09017	5.48417	5.3558	5.31005	0.1168	0.892939	-0.104488	0.906599	BSD domain-containing protein [Source:TAIR_LOCUS;Acc:AT1G03350]	F15K9.5	822638	824393	-1	1	UniProtKB Gene Name
AT1G03360	3.01218	2.53826	2.70311	2.75118	3.31872	3.09178	2.08713	2.83254	2.45419	2.70134	2.63086	2.59546	0.0813602	0.949827	-0.155724	0.891296	ribosomal RNA processing 4 [Source:TAIR_LOCUS;Acc:AT1G03360]	ATRRP4	824537	826358	1	1	TAIR Gene Name
AT1G03365	4.73227	4.7515	5.05354	4.84577	5.11822	4.41401	4.56729	4.69984	4.40394	4.61331	4.4553	4.49085	-0.145927	0.870262	-0.35492	0.565201	RING/U-box superfamily protein [Source:TAIR_LOCUS;Acc:AT1G03365]	RF4	826569	830383	1	1	UniProtKB Gene Name
AT1G03370	6.252	5.79605	5.28291	5.77699	4.90614	5.22435	5.98212	5.37087	5.82365	5.75791	6.27213	5.95123	-0.406115	0.687071	0.174244	0.898205	C2 calcium/lipid-binding and GRAM domain containing protein [Source:TAIR_LOCUS;Acc:AT1G03370]		830627	835361	1	1
AT1G03380	5.94557	6.38958	5.23022	5.85512	5.3145	5.64592	6.41275	5.79106	6.13253	6.23992	6.40227	6.25824	-0.0640673	0.965465	0.403116	0.664152	homolog of yeast autophagy 18 (ATG18) G [Source:TAIR_LOCUS;Acc:AT1G03380]	ATATG18G	835785	840940	1	1	TAIR Gene Name
AT1G03400	5.94036	5.35469	6.09349	5.79618	5.13761	5.4252	5.72479	5.4292	5.74737	5.43268	5.46855	5.54954	-0.366978	0.692605	-0.246644	0.822475	2-oxoglutarate (2OG) and Fe(II)-dependent oxygenase superfamily protein [Source:TAIR_LOCUS;Acc:AT1G03400]		842747	844190	-1	1
AT1G03410	3.71464	4.95913	4.32202	4.33193	4.08863	3.85476	3.96311	3.96883	3.99112	4.28282	3.80829	4.02741	-0.363099	0.42538	-0.304521	0.540373	2-oxoglutarate (2OG) and Fe(II)-dependent oxygenase superfamily protein [Source:TAIR_LOCUS;Acc:AT1G03410]	2A6	844436	847683	-1	1	TAIR Gene Name
AT1G03420	3.11185	3.75973	5.78183	4.21781	4.76704	3.90124	3.84029	4.16953	3.45226	3.61381	3.49466	3.52024	-0.0482798	0.982191	-0.697563	0.56575	transposable element gene [Source:TAIR_LOCUS;Acc:AT1G03420]	Sadhu4-2	846664	847739	1	1	TAIR Gene Name
AT1G03430	5.65657	5.29476	6.03036	5.66056	5.44409	5.3463	4.89481	5.2284	5.01983	5.33921	4.82035	5.0598	-0.432163	0.410229	-0.600764	0.193221	histidine-containing phosphotransfer factor 5 [Source:TAIR_LOCUS;Acc:AT1G03430]	AHP5	847873	849500	1	1	TAIR Gene Name
AT1G03440	1.74948	2.8487	2.38504	2.32774	2.58446	2.17406	2.47147	2.41	2.46518	2.58329	2.0372	2.36189	0.0822555	0.944996	0.0341509	0.978711	Leucine-rich repeat (LRR) family protein [Source:TAIR_LOCUS;Acc:AT1G03440]	AT1G03440	852366	854032	1	1	UniProtKB Gene Name
AT1G03470	0.351726	-0.432518	0.443641	0.12095	1.19954	0.634216	0.664551	0.832768	0.153548	0.0446955	0.915145	0.37113	0.711818	0.334594	0.25018	0.833199	Kinase interacting (KIP1-like) family protein [Source:TAIR_LOCUS;Acc:AT1G03470]	AT1G03470	865915	867733	-1	2	UniProtKB Gene Name
AT1G03475	8.08128	7.40213	9.16192	8.21511	8.73734	7.38837	7.70201	7.94257	7.49654	7.39089	7.42687	7.4381	-0.272536	0.839839	-0.77701	0.354408	Coproporphyrinogen III oxidase [Source:TAIR_LOCUS;Acc:AT1G03475]	LIN2	869051	871211	-1	1	TAIR Gene Name
AT1G03495	-3.32402	4.01058	-5.99094	-1.76813	-1.53459	5.98105	-2.05917	0.795763	-2.41547	3.24344	-2.38809	-0.520039	2.56389	0.0322976	1.24809	0.375848	HXXXD-type acyl-transferase family protein [Source:TAIR_LOCUS;Acc:AT1G03495]	3AT2	873184	874935	1	1	UniProtKB Gene Name
AT1G03510	0.494928	1.24763	0.548276	0.76361	1.24885	1.60156	0.464686	1.10503	0.736362	1.16001	0.205714	0.700696	0.341425	0.626719	-0.0629145	0.956077	Tetratricopeptide repeat (TPR)-like superfamily protein [Source:TAIR_LOCUS;Acc:AT1G03510]	PCMP-E3	876258	877547	-1	1	UniProtKB Gene Name
AT1G03520	4.01124	3.87465	3.83496	3.90695	3.64791	3.64951	3.98399	3.76047	3.84076	3.65107	3.86159	3.78447	-0.14648	0.783617	-0.122479	0.830179	Core-2/I-branching beta-1,6-N-acetylglucosaminyltransferase family protein [Source:TAIR_LOCUS;Acc:AT1G03520]		877862	880158	-1	2
AT1G03530	3.20855	4.31697	2.30614	3.27722	3.57395	3.97138	3.64704	3.73079	3.7481	4.07172	3.69819	3.83934	0.453567	0.438876	0.562119	0.29143	nuclear assembly factor 1 [Source:TAIR_LOCUS;Acc:AT1G03530]	ATNAF1	880496	883391	-1	1	TAIR Gene Name
AT1G03540	0.472026	1.28473	-1.8424	-0.0285475	-1.76916	0.160099	1.3328	-0.092087	0.0679602	0.93395	1.0619	0.687936	-0.0635395	0.988001	0.716483	0.81801	Pentatricopeptide repeat (PPR-like) superfamily protein [Source:TAIR_LOCUS;Acc:AT1G03540]	PCMP-E4	883782	885611	1	1	UniProtKB Gene Name
AT1G03545	0.907143	0.794638	-0.070894	0.543629	0.336302	0.813733	0.783888	0.644641	0.496464	0.716621	0.491552	0.568212	0.101012	0.927973	0.0245832	0.984128	Potential natural antisense gene, locus overlaps with AT1G03550 [Source:TAIR_LOCUS;Acc:AT1G03545]		885941	887906	1	1
AT1G03550	3.21546	5.00095	3.5783	3.93157	4.29193	4.71025	4.02887	4.34368	4.42764	5.1861	4.11453	4.57609	0.412107	0.301407	0.644516	0.0707903	Secretory carrier membrane protein (SCAMP) family protein [Source:TAIR_LOCUS;Acc:AT1G03550]	SCAMP2	885623	887956	-1	1	UniProtKB Gene Name
AT1G03560	3.31213	3.59387	3.13494	3.34698	3.01421	3.32784	3.18137	3.17447	3.32031	3.34338	3.30598	3.32322	-0.172504	0.826279	-0.0237541	0.981866	Pentatricopeptide repeat (PPR-like) superfamily protein [Source:TAIR_LOCUS;Acc:AT1G03560]		890156	892410	-1	1
AT1G03590	3.86945	3.8047	4.21872	3.96429	3.86871	3.77615	3.83571	3.82686	3.94339	3.81445	3.59703	3.78495	-0.137434	0.841515	-0.179336	0.772562	Protein phosphatase 2C family protein [Source:TAIR_LOCUS;Acc:AT1G03590]	PPC6-6	894254	897518	-1	1	UniProtKB Gene Name
AT1G03600	7.77639	6.33966	9.08367	7.73324	8.15634	6.66329	7.80487	7.5415	7.74434	6.36603	7.40071	7.17036	-0.191745	0.913622	-0.562885	0.640746	photosystem II family protein [Source:TAIR_LOCUS;Acc:AT1G03600]	PSB27	898876	899655	1	1	TAIR Gene Name
AT1G03610	5.51947	3.81939	5.54134	4.96006	5.52365	3.87265	5.47234	4.95621	5.64458	3.83743	5.50717	4.99639	-0.00385243	0.996264	0.0363275	0.960512	Protein of unknown function (DUF789) [Source:TAIR_LOCUS;Acc:AT1G03610]		900887	903003	1	1
AT1G03620	0.106136	-0.747629	1.27592	0.211475	1.45928	0.160099	0.287479	0.635618	0.772696	0.440155	1.02659	0.74648	0.424143	0.67003	0.535005	0.546285	ELMO/CED-12 family protein [Source:TAIR_LOCUS;Acc:AT1G03620]		904319	906186	-1	1
AT1G03630	8.37782	7.68174	9.47384	8.51114	9.018	7.69079	8.03356	8.24745	7.62919	7.41426	7.13978	7.39441	-0.263687	0.903276	-1.11673	0.35514	protochlorophyllide oxidoreductase C [Source:TAIR_LOCUS;Acc:AT1G03630]	POR C	907642	909376	1	2	TAIR Gene Name
AT1G03650	1.59906	1.1704	2.71848	1.82931	2.19251	1.84947	1.52769	1.85655	1.8938	1.77155	1.71061	1.79198	0.0272395	0.98338	-0.0373307	0.977555	Acyl-CoA N-acyltransferases (NAT) superfamily protein [Source:TAIR_LOCUS;Acc:AT1G03650]	AT1G03650/F21B7_10	910023	911193	-1	1	UniProtKB Gene Name
AT1G03660	-2.79348	-6.54837	-5.99094	-5.11093	-1.33249	-2.72244	-1.59401	-1.88298	-3.32241	-3.50329	-1.25369	-2.69313	3.22796	0.036555	2.4178	0.128233	Ankyrin-repeat containing protein [Source:TAIR_LOCUS;Acc:AT1G03660]		911436	911759	-1	1
AT1G03680	8.41536	8.4901	8.75417	8.55321	8.20945	8.39364	8.66947	8.42419	8.39652	8.24417	8.27626	8.30565	-0.129023	0.890945	-0.247562	0.741201	thioredoxin M-type 1 [Source:TAIR_LOCUS;Acc:AT1G03680]	ATHM1	916819	918064	-1	1	TAIR Gene Name
AT1G03687	3.05519	2.88917	3.12338	3.02258	3.08961	2.84135	2.76496	2.89864	2.98661	3.04321	2.67131	2.90038	-0.123944	0.877005	-0.122206	0.879269	DTW domain-containing protein [Source:TAIR_LOCUS;Acc:AT1G03687]		918299	920507	1	2
AT1G03730	2.2033	2.22002	1.99076	2.13802	2.0026	2.26549	2.15505	2.14105	2.89243	2.46953	2.5339	2.63195	0.00302479	0.997607	0.493926	0.257366	unknown protein; BEST Arabidopsis thaliana protein match is: unknown protein (TAIR:AT4G03600.1); Has 50 Blast hits to 50 proteins in 10 species: Archae - 0; Bacteria - 0; Metazoa - 0; Fungi - 0; Plants - 50; Viruses - 0; Other Eukaryotes - 0 (source /.../ BLink). [Source:TAIR_LOCUS;Acc:AT1G03730]		930828	931895	-1	1
AT1G03740	7.14942	7.00122	6.3381	6.82958	6.43053	6.08547	7.10112	6.53904	7.47059	7.06987	7.35683	7.2991	-0.29054	0.748631	0.469521	0.514881	Protein kinase superfamily protein [Source:TAIR_LOCUS;Acc:AT1G03740]		933512	937043	1	2
AT1G03750	2.79868	3.28132	1.83159	2.6372	2.57796	2.87738	2.97986	2.81173	2.8802	3.31083	3.19158	3.12754	0.174534	0.834288	0.490344	0.346111	switch 2 [Source:TAIR_LOCUS;Acc:AT1G03750]	CHR9	937920	941162	1	1	TAIR Gene Name
AT1G03760	3.17703	3.82771	2.80748	3.27074	3.55402	3.64692	2.94193	3.38096	3.24946	3.59594	3.07592	3.30711	0.110215	0.838738	0.0363646	0.957445	Prefoldin chaperone subunit family protein [Source:TAIR_LOCUS;Acc:AT1G03760]	AT1G03760/F11M21_31	941062	943377	-1	1	UniProtKB Gene Name
AT1G03770	1.32007	1.86035	1.14758	1.44267	1.43101	1.92053	1.22449	1.52534	2.10601	2.28553	1.86829	2.08661	0.0826771	0.929165	0.643947	0.140881	RING 1B [Source:TAIR_LOCUS;Acc:AT1G03770]	RING1B	944572	947483	1	3	TAIR Gene Name
AT1G03820	3.92743	2.37658	2.07619	2.7934	6.09887	7.48124	6.15333	6.57781	3.10324	3.8563	2.7217	3.22708	3.78441	0.000415888	0.433678	0.777512	unknown protein; FUNCTIONS IN: molecular_function unknown; INVOLVED IN: biological_process unknown; LOCATED IN: endomembrane system; EXPRESSED IN: 21 plant structures; EXPRESSED DURING: 13 growth stages; Has 1345 Blast hits to 1122 proteins in 102 s /.../: Archae - 2; Bacteria - 28; Metazoa - 28; Fungi - 30; Plants - 109; Viruses - 0; Other Eukaryotes - 1148 (source: NCBI BLink). [Source:TAIR_LOC…	F11M21.25	959869	960728	-1	1	UniProtKB Gene Name
AT1G03830	3.41178	3.72226	3.76182	3.63195	3.62897	3.28163	2.94619	3.2856	2.97134	3.08235	2.54015	2.86461	-0.346356	0.476732	-0.767341	0.0465466	guanylate-binding family protein [Source:TAIR_LOCUS;Acc:AT1G03830]	F11M21.24	962016	966757	-1	2	UniProtKB Gene Name
AT1G03850	3.67257	-2.48344	2.1681	1.11908	5.81032	3.20231	4.41276	4.47513	5.7325	4.11619	4.47006	4.77292	3.35605	0.023486	3.65384	0.0144509	Glutaredoxin family protein [Source:TAIR_LOCUS;Acc:AT1G03850]	GRXS13	976097	977761	-1	2	UniProtKB Gene Name
AT1G03860	5.34293	5.48854	5.21362	5.34836	5.39363	5.56699	5.459	5.47321	5.26952	5.50568	5.54632	5.44051	0.124843	0.802754	0.0921447	0.867539	prohibitin 2 [Source:TAIR_LOCUS;Acc:AT1G03860]	ATPHB2	979308	981885	-1	3	TAIR Gene Name
AT1G03870	2.04935	2.42703	5.15109	3.20916	4.03667	2.70259	3.81489	3.51805	3.5553	3.04321	4.9789	3.85914	0.308892	0.872301	0.649977	0.650245	FASCICLIN-like arabinoogalactan 9 [Source:TAIR_LOCUS;Acc:AT1G03870]	FLA9	982506	983540	-1	1	TAIR Gene Name
AT1G03900	5.18376	5.98832	6.30348	5.82519	6.57142	6.18899	6.03849	6.2663	6.09653	6.26528	6.29848	6.2201	0.441114	0.481787	0.394907	0.551659	non-intrinsic ABC protein 4 [Source:TAIR_LOCUS;Acc:AT1G03900]	ATNAP4	991139	993118	1	1	TAIR Gene Name
AT1G03905	0.472026	1.18357	-1.06037	0.198407	0.108275	1.36688	0.366107	0.613753	1.06374	1.60124	0.95326	1.20608	0.415346	0.625171	1.00767	0.0937707	P-loop containing nucleoside triphosphate hydrolases superfamily protein [Source:TAIR_LOCUS;Acc:AT1G03905]	ABCI19	993400	995784	1	1	UniProtKB Gene Name
AT1G03910	5.31424	5.89418	5.86172	5.69005	6.08174	5.70843	5.65567	5.81528	5.72361	5.78452	5.60387	5.704	0.125232	0.855943	0.0139512	0.987329	EXPRESSED IN: 25 plant structures; EXPRESSED DURING: 13 growth stages; CONTAINS InterPro DOMAIN/s: Cactin protein, cactus-binding domain, C-terminal (InterPro:IPR019134), Cactin, central region (InterPro:IPR018816); BEST Arabidopsis thaliana protein /.../ is: unknown protein (TAIR:AT2G36815.2); Has 11711 Blast hits to 7382 proteins in 452 species: Archae - 31; Bacteria - 352; Metazoa - 6006; Fung…	F21M11.16	996115	1000437	1	2	UniProtKB Gene Name
AT1G03930	6.10574	5.76842	5.6711	5.84842	5.36772	5.35502	6.13155	5.6181	5.88863	5.44077	5.9174	5.74893	-0.230325	0.782937	-0.0994879	0.925616	dual specificity kinase 1 [Source:TAIR_LOCUS;Acc:AT1G03930]	ADK1	1004769	1008370	1	1	TAIR Gene Name
AT1G03940	-3.68661	5.16111	-5.99094	-1.50548	-1.43005	6.60132	-0.475896	1.56512	-1.86551	4.12399	-1.90399	0.118165	3.07061	0.0945639	1.62365	0.477817	HXXXD-type acyl-transferase family protein [Source:TAIR_LOCUS;Acc:AT1G03940]	3AT1	1009542	1011056	-1	1	UniProtKB Gene Name
AT1G03950	4.24029	4.44935	4.43755	4.37573	4.26338	4.56976	4.47598	4.43638	4.40253	4.51139	4.38432	4.43274	0.0606436	0.910219	0.0570126	0.916923	vacuolar protein sorting-associated protein 2.3 [Source:TAIR_LOCUS;Acc:AT1G03950]	VPS2.3	1011172	1013365	-1	1	TAIR Gene Name
AT1G03960	4.64792	4.54937	3.70057	4.29928	3.61941	3.92928	4.25689	3.9352	4.13223	4.42957	4.19578	4.25253	-0.364087	0.672687	-0.0467571	0.973141	Calcium-binding EF hand family protein [Source:TAIR_LOCUS;Acc:AT1G03960]	F21M11.11	1013715	1017929	1	2	UniProtKB Gene Name
AT1G03970	4.49584	5.48396	5.28689	5.0889	5.68338	5.4813	5.32896	5.49788	5.45529	5.42831	5.3558	5.41313	0.408983	0.398236	0.324237	0.550138	G-box binding factor 4 [Source:TAIR_LOCUS;Acc:AT1G03970]	GBF4	1018100	1019247	1	1	TAIR Gene Name
AT1G04000	1.86826	3.24753	4.07159	3.06246	4.00015	3.05689	3.06857	3.37521	3.25576	3.40889	2.80195	3.15553	0.312749	0.87419	0.0930747	0.969035	unknown protein; BEST Arabidopsis thaliana protein match is: unknown protein (TAIR:AT5G44060.1); Has 62 Blast hits to 62 proteins in 10 species: Archae - 0; Bacteria - 0; Metazoa - 0; Fungi - 0; Plants - 62; Viruses - 0; Other Eukaryotes - 0 (source /.../ BLink). [Source:TAIR_LOCUS;Acc:AT1G04000]	F21M11.6	1028106	1029119	-1	1	UniProtKB Gene Name
AT1G04010	3.15203	4.17601	2.45991	3.26265	2.23431	3.74977	3.088	3.02402	3.22717	3.83553	3.28753	3.45008	-0.238627	0.828287	0.187428	0.874356	phospholipid sterol acyl transferase 1 [Source:TAIR_LOCUS;Acc:AT1G04010]	PSAT1	1031200	1036237	-1	1	TAIR Gene Name
AT1G04020	2.65864	-3.39592	1.69971	0.320811	-0.662715	-0.0293105	0.745197	0.0177239	1.13506	-0.584073	2.04603	0.865671	-0.303087	0.928857	0.54486	0.853197	breast cancer associated RING 1 [Source:TAIR_LOCUS;Acc:AT1G04020]	ATBARD1	1036537	1040224	1	2	TAIR Gene Name
AT1G04030	1.78708	1.85216	1.63706	1.75877	1.97334	2.2449	1.97467	2.06431	1.64439	2.10653	2.36796	2.03962	0.30554	0.563048	0.280857	0.610451	unknown protein; BEST Arabidopsis thaliana protein match is: unknown protein (TAIR:AT5G44040.1); Has 1835 Blast hits to 1511 proteins in 238 species: Archae - 7; Bacteria - 164; Metazoa - 377; Fungi - 135; Plants - 187; Viruses - 22; Other Eukaryote /.../3 (source: NCBI BLink). [Source:TAIR_LOCUS;Acc:AT1G04030]	F21M11.3	1040383	1042892	1	1	UniProtKB Gene Name
AT1G04040	4.2112	2.99307	5.05664	4.08697	5.11478	4.73238	3.9462	4.59778	4.7293	4.06526	4.99372	4.59609	0.510813	0.752027	0.50912	0.753078	HAD superfamily, subfamily IIIB acid phosphatase [Source:TAIR_LOCUS;Acc:AT1G04040]	F21M11.2	1042362	1043864	-1	1	UniProtKB Gene Name
AT1G04050	1.03765	1.22234	0.823632	1.02788	0.0360176	0.634216	0.340371	0.336868	0.285682	0.860058	0.59168	0.57914	-0.691008	0.161558	-0.448736	0.43997	homolog of SU(var)3-9 1 [Source:TAIR_LOCUS;Acc:AT1G04050]	SUVR1	1045598	1049297	-1	1	TAIR Gene Name
AT1G04070	0.494928	1.86851	2.26503	1.54282	2.32227	2.35144	1.38405	2.01925	1.85234	2.22246	1.52087	1.86522	0.47643	0.701775	0.3224	0.82568	translocase of outer membrane 22-I [Source:TAIR_LOCUS;Acc:AT1G04070]	TOM22-I	1050553	1051186	-1	1	TAIR Gene Name
AT1G04080	6.47034	6.67967	5.95686	6.36896	6.08233	6.14273	6.65963	6.2949	6.42802	6.59361	6.63723	6.55295	-0.0740606	0.930545	0.183994	0.779438	Tetratricopeptide repeat (TPR)-like superfamily protein [Source:TAIR_LOCUS;Acc:AT1G04080]	PRP39	1051312	1056827	1	3	TAIR Gene Name
AT1G04100	2.2975	2.23898	2.17919	2.23856	1.91301	2.02093	2.31534	2.08309	2.21446	2.25148	2.25835	2.24143	-0.155463	0.855086	0.00287256	0.997933	indoleacetic acid-induced protein 10 [Source:TAIR_LOCUS;Acc:AT1G04100]	IAA10	1059506	1061191	1	1	TAIR Gene Name
AT1G04120	5.57628	5.74789	5.14964	5.49127	5.13534	5.80402	5.67567	5.53834	5.3622	5.94377	5.78298	5.69632	0.0470714	0.958051	0.205046	0.739313	multidrug resistance-associated protein 5 [Source:TAIR_LOCUS;Acc:AT1G04120]	ATMRP5	1064450	1071047	-1	2	TAIR Gene Name
AT1G04130	2.83952	3.36392	3.41194	3.20512	3.59035	3.5501	2.62301	3.25448	2.65936	3.19966	2.85306	2.90403	0.0493605	0.968154	-0.301099	0.710995	Tetratricopeptide repeat (TPR)-like superfamily protein [Source:TAIR_LOCUS;Acc:AT1G04130]	TPR2	1073427	1075568	1	1	TAIR Gene Name
AT1G04140	6.50813	6.83955	5.3928	6.24683	5.32451	6.20043	6.93541	6.15345	6.53444	6.68424	6.93438	6.71769	-0.0933767	0.96017	0.47086	0.702983	Transducin family protein / WD-40 repeat family protein [Source:TAIR_LOCUS;Acc:AT1G04140]	F20D22.9	1075543	1080630	-1	2	UniProtKB Gene Name
AT1G04160	3.69004	3.40907	1.95256	3.01722	1.003	2.22402	2.7357	1.98757	1.69224	1.62811	1.68821	1.66952	-1.02965	0.527264	-1.3477	0.346357	myosin XI B [Source:TAIR_LOCUS;Acc:AT1G04160]	XIB	1086495	1096146	1	1	TAIR Gene Name
AT1G04170	6.30925	5.91128	5.98753	6.06935	6.38295	6.01737	5.97068	6.12367	5.8412	5.98213	6.22953	6.01762	0.0543173	0.948115	-0.0517308	0.950812	eukaryotic translation initiation factor 2 gamma subunit [Source:TAIR_LOCUS;Acc:AT1G04170]	EIF2 GAMMA	1096946	1099898	1	1	TAIR Gene Name
AT1G04180	-0.821398	-2.32386	2.77105	-0.124734	-1.76916	-6.40126	1.37141	-2.26634	-0.547482	-5.07781	1.3742	-1.41703	-2.14161	0.109471	-1.2923	0.413832	YUCCA 9 [Source:TAIR_LOCUS;Acc:AT1G04180]	YUC9	1104623	1105988	1	1	TAIR Gene Name
AT1G04190	4.77734	4.70385	4.82018	4.76712	5.27792	4.83932	4.42196	4.8464	4.41653	4.68026	4.43537	4.51072	0.0792787	0.94293	-0.256402	0.745753	Tetratricopeptide repeat (TPR)-like superfamily protein [Source:TAIR_LOCUS;Acc:AT1G04190]	TPR3	1106428	1108715	-1	1	TAIR Gene Name
AT1G04200	5.30779	5.03891	4.41132	4.91934	4.27976	4.71766	4.94991	4.64911	4.73154	4.65686	4.88049	4.7563	-0.270229	0.776031	-0.163046	0.884992	FUNCTIONS IN: molecular_function unknown; INVOLVED IN: N-terminal protein myristoylation; LOCATED IN: cellular_component unknown; EXPRESSED IN: 22 plant structures; EXPRESSED DURING: 13 growth stages; CONTAINS InterPro DOMAIN/s: Dymeclin (InterPro:I /.../42); Has 395 Blast hits to 389 proteins in 117 species: Archae - 0; Bacteria - 0; Metazoa - 262; Fungi - 21; Plants - 68; Viruses - 0; Other Euk…		1109482	1114107	1	1
AT1G04210	5.75117	5.30961	4.25129	5.10402	4.40084	4.88282	5.65437	4.97935	5.11429	5.11856	5.68888	5.30724	-0.124676	0.939737	0.203222	0.891219	Leucine-rich repeat protein kinase family protein [Source:TAIR_LOCUS;Acc:AT1G04210]	F20D22.2	1114405	1119739	1	1	UniProtKB Gene Name
AT1G04220	1.24099	3.23504	1.3361	1.93738	1.13108	3.58038	3.96521	2.89223	0.383227	1.63695	0.915145	0.978442	0.95485	0.584108	-0.958933	0.581573	3-ketoacyl-CoA synthase 2 [Source:TAIR_LOCUS;Acc:AT1G04220]	KCS2	1119699	1122526	-1	1	TAIR Gene Name
AT1G04230	3.43565	3.4927	3.08817	3.33884	3.55067	3.30162	3.3485	3.40026	3.42739	3.52921	3.45555	3.47072	0.0614236	0.909425	0.131877	0.754312	Protein of unknown function (DUF2361) [Source:TAIR_LOCUS;Acc:AT1G04230]	AT1G04230	1125518	1128168	1	1	UniProtKB Gene Name
AT1G04240	6.50107	6.41783	7.4302	6.78304	5.80387	5.42821	6.72265	5.98491	5.56899	5.04605	6.69748	5.77084	-0.798129	0.627105	-1.0122	0.486573	AUX/IAA transcriptional regulator family protein [Source:TAIR_LOCUS;Acc:AT1G04240]	IAA3/SHY2	1128188	1129551	-1	1	TAIR Gene Name
AT1G04250	3.52181	3.38667	4.32458	3.74435	4.07698	3.12584	3.47778	3.5602	2.74286	2.15034	2.4698	2.45433	-0.184153	0.844845	-1.29002	0.0113508	AUX/IAA transcriptional regulator family protein [Source:TAIR_LOCUS;Acc:AT1G04250]	IAA17/AXR3	1136258	1138613	1	1	TAIR Gene Name
AT1G04260	1.877	3.5238	4.71257	3.37113	5.05369	3.75218	3.39289	4.06626	3.62978	3.55951	3.39482	3.52804	0.695131	0.708346	0.15691	0.954884	CAMV movement protein interacting protein 7 [Source:TAIR_LOCUS;Acc:AT1G04260]	MPI7	1140528	1141365	-1	1	TAIR Gene Name
AT1G04270	7.44534	6.60739	7.82733	7.29335	8.06614	7.22656	7.21713	7.50328	7.07584	6.9512	7.41237	7.14647	0.209925	0.833537	-0.146885	0.894559	cytosolic ribosomal protein S15 [Source:TAIR_LOCUS;Acc:AT1G04270]	RPS15	1141604	1143053	-1	2	TAIR Gene Name
AT1G04280	4.40806	2.76415	5.10388	4.09203	5.63178	3.54731	4.92208	4.70039	5.37507	4.57522	5.36635	5.10554	0.608361	0.546956	1.01351	0.209674	P-loop containing nucleoside triphosphate hydrolases superfamily protein [Source:TAIR_LOCUS;Acc:AT1G04280]	F19P19.28	1143436	1146654	-1	1	UniProtKB Gene Name
AT1G04290	3.40575	3.22875	3.5439	3.3928	3.88213	3.77615	3.35813	3.67214	2.9403	3.21147	3.08022	3.07733	0.279338	0.64516	-0.315471	0.579757	Thioesterase superfamily protein [Source:TAIR_LOCUS;Acc:AT1G04290]	F19P19.27	1147523	1148533	-1	1	UniProtKB Gene Name
AT1G04300	6.1256	6.59387	5.6319	6.11713	6.06381	5.854	6.62789	6.1819	6.49736	6.49745	6.57435	6.52306	0.0647744	0.957224	0.405931	0.560119	TRAF-like superfamily protein [Source:TAIR_LOCUS;Acc:AT1G04300]		1148597	1154652	-1	4
AT1G04310	1.94511	0.941501	1.48545	1.45735	1.2326	1.05477	1.64785	1.31174	1.4463	0.557214	1.09636	1.03329	-0.145612	0.922924	-0.424064	0.689931	ethylene response sensor 2 [Source:TAIR_LOCUS;Acc:AT1G04310]	ERS2	1154764	1157711	-1	1	TAIR Gene Name
AT1G04340	3.80447	3.99034	3.1	3.63161	2.85064	3.95259	3.79376	3.53233	3.67502	3.86936	3.86656	3.80365	-0.099276	0.929118	0.17204	0.860451	HR-like lesion-inducing protein-related [Source:TAIR_LOCUS;Acc:AT1G04340]	F19P19.23	1163097	1164851	-1	1	UniProtKB Gene Name
AT1G04350	6.2658	6.23158	5.94002	6.1458	6.0853	6.14865	6.36311	6.19902	5.6369	6.10124	5.78822	5.84212	0.053225	0.962966	-0.303677	0.679313	2-oxoglutarate (2OG) and Fe(II)-dependent oxygenase superfamily protein [Source:TAIR_LOCUS;Acc:AT1G04350]		1165165	1166768	1	1
AT1G04360	0.800879	-1.44736	2.20113	0.518217	0.92443	-0.0293105	1.07655	0.657224	0.717842	-3.86347	-0.111388	-1.08567	0.139008	0.95682	-1.60389	0.161382	RING/U-box superfamily protein [Source:TAIR_LOCUS;Acc:AT1G04360]	ATL1	1167457	1168878	-1	1	UniProtKB Gene Name
AT1G04390	3.69993	3.82978	2.55697	3.36223	2.55166	3.32784	3.72102	3.20017	3.43573	3.65754	3.6643	3.58585	-0.162054	0.904807	0.223627	0.85715	BTB/POZ domain-containing protein [Source:TAIR_LOCUS;Acc:AT1G04390]		1179363	1183704	-1	1
AT1G04400	8.1718	7.76909	7.87916	7.94001	7.8797	7.51862	8.49606	7.96479	8.30161	7.59373	8.23478	8.04337	0.024779	0.979046	0.10336	0.895826	cryptochrome 2 [Source:TAIR_LOCUS;Acc:AT1G04400]	CRY2	1185550	1188517	-1	2	TAIR Gene Name
AT1G04410	9.13224	8.28349	9.68003	9.03192	9.75071	8.8575	9.41251	9.34024	9.11645	8.71989	9.57199	9.13611	0.308319	0.664396	0.104189	0.919289	Lactate/malate dehydrogenase family protein [Source:TAIR_LOCUS;Acc:AT1G04410]	AT1G04410	1189078	1191412	-1	1	UniProtKB Gene Name
AT1G04420	6.89767	5.75549	7.49811	6.71709	6.57312	5.85009	6.65607	6.35976	6.05916	5.47086	6.002	5.84401	-0.357329	0.788363	-0.873082	0.318444	NAD(P)-linked oxidoreductase superfamily protein [Source:TAIR_LOCUS;Acc:AT1G04420]	AT1G04420	1191608	1193884	1	1	UniProtKB Gene Name
AT1G04430	7.15415	6.87298	7.08556	7.03756	6.37228	6.4475	6.73928	6.51969	6.25202	5.78207	6.62268	6.21893	-0.517876	0.282057	-0.818635	0.0595957	S-adenosyl-L-methionine-dependent methyltransferases superfamily protein [Source:TAIR_LOCUS;Acc:AT1G04430]		1198118	1201527	1	2
AT1G04440	6.37401	5.36681	6.13189	5.95757	6.26414	5.35027	6.99997	6.20479	6.5297	5.6907	6.89075	6.37038	0.247226	0.768576	0.412816	0.532219	casein kinase like 13 [Source:TAIR_LOCUS;Acc:AT1G04440]	CKL13	1202255	1205803	1	1	TAIR Gene Name
AT1G04480	5.33581	4.81752	6.47481	5.54271	6.82487	5.46455	5.20301	5.83081	5.19885	5.07518	5.50955	5.26119	0.288096	0.883535	-0.281521	0.886832	Ribosomal protein L14p/L23e family protein [Source:TAIR_LOCUS;Acc:AT1G04480]	EMB2171	1216095	1217467	1	1	UniProtKB Gene Name
AT1G04490	-1.00198	-1.62148	-1.53299	-1.38548	-2.60382	-1.30194	-1.49789	-1.80122	-1.09213	-1.82637	-0.192467	-1.03699	-0.415735	0.882539	0.348494	0.905548	Protein of unknown function (DUF3527) [Source:TAIR_LOCUS;Acc:AT1G04490]	F19P19.4	1217948	1220137	-1	2	UniProtKB Gene Name
AT1G04500	-1.85002	-1.53178	-5.99094	-3.12425	-0.853802	0.0996994	0.511557	-0.0808484	0.0970639	-0.464572	1.0619	0.231463	3.0434	0.169207	3.35571	0.121954	CCT motif family protein [Source:TAIR_LOCUS;Acc:AT1G04500]	AT1G04500/F19P19_3	1221433	1224366	-1	1	UniProtKB Gene Name
AT1G04510	5.62641	5.37318	5.36421	5.4546	5.51667	5.24157	5.21892	5.32572	5.27411	5.30824	5.29271	5.29169	-0.128879	0.75883	-0.162915	0.666268	MOS4-associated complex 3A [Source:TAIR_LOCUS;Acc:AT1G04510]	MAC3A	1226575	1230827	1	2	TAIR Gene Name
AT1G04520	2.61226	-0.432518	0.795472	0.991737	0.177132	-0.414073	0.534434	0.0991641	0.00790782	-0.285191	0.205714	-0.0238565	-0.892573	0.595827	-1.01559	0.51957	plasmodesmata-located protein 2 [Source:TAIR_LOCUS;Acc:AT1G04520]	PDLP2	1231578	1234032	1	1	TAIR Gene Name
AT1G04530	6.91264	5.08801	7.10366	6.3681	7.2712	5.43046	6.03949	6.24705	6.17132	5.49437	5.84016	5.83528	-0.121051	0.934789	-0.532822	0.549064	Tetratricopeptide repeat (TPR)-like superfamily protein [Source:TAIR_LOCUS;Acc:AT1G04530]	TPR4	1234176	1236034	-1	1	TAIR Gene Name
AT1G04550	4.04655	4.37338	3.73151	4.05048	4.16986	4.31794	3.94407	4.14395	3.67502	4.38101	3.79531	3.95044	0.0934716	0.898277	-0.100038	0.889255	AUX/IAA transcriptional regulator family protein [Source:TAIR_LOCUS;Acc:AT1G04550]	IAA12/BDL	1240375	1242121	1	2	TAIR Gene Name
AT1G04555	2.28441	2.70186	2.70311	2.56313	2.79553	3.18447	2.92475	2.96825	3.09974	2.91173	2.9217	2.97772	0.405122	0.315361	0.414596	0.299301	unknown protein; FUNCTIONS IN: molecular_function unknown; INVOLVED IN: biological_process unknown; LOCATED IN: cellular_component unknown; BEST Arabidopsis thaliana protein match is: unknown protein (TAIR:AT4G33380.1); Has 84 Blast hits to 83 prote /.../ 15 species: Archae - 0; Bacteria - 0; Metazoa - 9; Fungi - 0; Plants - 75; Viruses - 0; Other Eukaryotes - 0 (source: NCBI BLink). [Source:TAIR…		1242558	1244244	1	1
AT1G04570	2.62269	4.74822	1.71497	3.02863	1.9334	3.77377	3.01275	2.90664	1.41234	3.11101	1.41571	1.97969	-0.121987	0.938876	-1.04894	0.152121	Major facilitator superfamily protein [Source:TAIR_LOCUS;Acc:AT1G04570]		1246728	1248775	-1	1
AT1G04580	-6.49411	-4.23924	-4.3823	-5.03855	-3.14178	1.27474	0.705438	-0.387201	1.8439	1.37654	2.85808	2.02617	4.65135	0.0299323	7.06472	0.00229144	aldehyde oxidase 4 [Source:TAIR_LOCUS;Acc:AT1G04580]	AAO4	1252122	1257510	-1	1	TAIR Gene Name
AT1G04590	4.01322	4.2256	4.60278	4.28053	4.60844	4.20794	3.7914	4.20259	4.09954	4.01413	3.77429	3.96265	-0.0779404	0.932656	-0.317883	0.577135	BEST Arabidopsis thaliana protein match is: Pentatricopeptide repeat (PPR) superfamily protein (TAIR:AT4G21190.1); Has 111 Blast hits to 111 proteins in 15 species: Archae - 0; Bacteria - 0; Metazoa - 0; Fungi - 0; Plants - 109; Viruses - 0; Other E /.../tes - 2 (source: NCBI BLink). [Source:TAIR_LOCUS;Acc:AT1G04590]	T1G11.16	1258577	1261426	-1	2	UniProtKB Gene Name
AT1G04600	0.326413	-0.140938	-0.233757	-0.0160936	1.99291	1.35407	3.41151	2.25283	2.97518	2.06133	2.90727	2.64793	2.26893	0.0167115	2.66402	0.00631969	myosin XI A [Source:TAIR_LOCUS;Acc:AT1G04600]	XIA	1262123	1272376	1	1	TAIR Gene Name
AT1G04620	5.05385	6.64048	5.28821	5.66085	4.76996	6.28802	5.68461	5.58086	5.20848	6.40519	5.69586	5.76984	-0.0799871	0.947341	0.108996	0.923946	coenzyme F420 hydrogenase family / dehydrogenase, beta subunit family [Source:TAIR_LOCUS;Acc:AT1G04620]	HCAR	1282741	1286584	-1	1	UniProtKB Gene Name
AT1G04630	3.73402	3.68379	5.47303	4.29695	5.21805	4.25125	3.88537	4.45156	4.08906	3.81831	3.77429	3.89389	0.154608	0.938636	-0.403063	0.794814	GRIM-19 protein [Source:TAIR_LOCUS;Acc:AT1G04630]	MEE4	1289734	1291112	-1	1	TAIR Gene Name
AT1G04640	5.50473	5.15207	6.24482	5.63388	6.04991	5.33992	5.53937	5.64307	5.19724	4.98852	4.99938	5.06171	0.00919039	0.994982	-0.572163	0.411395	lipoyltransferase 2 [Source:TAIR_LOCUS;Acc:AT1G04640]	LIP2	1292080	1293357	1	2	TAIR Gene Name
AT1G04650	2.25116	1.90066	1.6047	1.91884	1.58014	1.19075	1.38405	1.38498	1.10696	1.49815	1.36009	1.32174	-0.533862	0.351303	-0.597107	0.275059	unknown protein; Has 30201 Blast hits to 17322 proteins in 780 species: Archae - 12; Bacteria - 1396; Metazoa - 17338; Fungi - 3422; Plants - 5037; Viruses - 0; Other Eukaryotes - 2996 (source: NCBI BLink). [Source:TAIR_LOCUS;Acc:AT1G04650]	T1G11.9	1294893	1299002	-1	1	UniProtKB Gene Name
AT1G04680	4.92695	4.64756	4.92041	4.83164	4.85208	5.83603	5.84245	5.51019	4.15584	3.80865	3.59103	3.85184	0.678547	0.327615	-0.979801	0.114806	Pectin lyase-like superfamily protein [Source:TAIR_LOCUS;Acc:AT1G04680]		1303529	1307884	-1	1
AT1G04690	6.68506	6.93401	6.71752	6.77886	6.77469	6.9733	6.87899	6.87566	6.52685	6.75591	6.8208	6.70118	0.0967945	0.839171	-0.0776805	0.878707	potassium channel beta subunit 1 [Source:TAIR_LOCUS;Acc:AT1G04690]	KAB1	1313564	1315750	1	1	TAIR Gene Name
AT1G04710	3.85182	4.45069	4.12229	4.1416	4.45241	4.47076	4.495	4.47272	4.44276	4.44457	4.30782	4.39839	0.331123	0.428709	0.256786	0.588759	peroxisomal 3-ketoacyl-CoA thiolase 4 [Source:TAIR_LOCUS;Acc:AT1G04710]	KAT1	1321904	1324782	1	1	TAIR Gene Name
AT1G04730	3.1007	-0.650321	2.11134	1.52057	1.07756	-0.0634613	1.44565	0.819913	1.50115	-0.038011	1.79685	1.08666	-0.700659	0.592033	-0.433909	0.790191	P-loop containing nucleoside triphosphate hydrolases superfamily protein [Source:TAIR_LOCUS;Acc:AT1G04730]	CTF18	1325296	1331086	-1	1	TAIR Gene Name
AT1G04750	6.45509	6.25737	6.75829	6.49025	6.65727	6.44528	6.13947	6.41401	6.05076	6.15313	6.36602	6.18997	-0.0762421	0.934948	-0.300276	0.61321	vesicle-associated membrane protein 721 [Source:TAIR_LOCUS;Acc:AT1G04750]	VAMP7B	1331466	1333567	-1	2	TAIR Gene Name
AT1G04770	5.33819	3.2161	4.82563	4.45997	5.89911	5.4957	4.75254	5.38245	4.6152	4.01748	4.46516	4.36595	0.922481	0.225915	-0.0940238	0.954516	Tetratricopeptide repeat (TPR)-like superfamily protein [Source:TAIR_LOCUS;Acc:AT1G04770]	AT1G04770	1336371	1337849	-1	1	UniProtKB Gene Name
AT1G04780	5.94036	6.02108	5.30006	5.75384	5.70198	5.74322	6.40156	5.94892	6.20391	6.11138	6.38469	6.23333	0.195087	0.844789	0.479493	0.472456	Ankyrin repeat family protein [Source:TAIR_LOCUS;Acc:AT1G04780]	AT1G04780/F13M7_20	1340669	1343584	-1	1	UniProtKB Gene Name
AT1G04790	4.92273	4.80917	3.54824	4.42672	3.65104	4.18668	4.86476	4.23416	4.89993	4.76624	4.76159	4.80926	-0.192555	0.882192	0.382539	0.703746	RING/U-box superfamily protein [Source:TAIR_LOCUS;Acc:AT1G04790]	F13M7.22	1345036	1348451	1	1	UniProtKB Gene Name
AT1G04800	2.6637	0.424214	5.39033	2.82608	1.9334	0.353465	-0.475896	0.603656	0.680064	-0.808465	-0.872864	-0.333755	-2.22243	0.303653	-3.15984	0.106485	glycine-rich protein [Source:TAIR_LOCUS;Acc:AT1G04800]	F13M7.21	1348452	1349286	-1	1	UniProtKB Gene Name
AT1G04810	5.41225	5.60134	5.26824	5.42728	5.52626	5.27204	5.86847	5.55559	5.55965	5.56778	5.84957	5.659	0.128308	0.875305	0.23172	0.724598	26S proteasome regulatory complex, non-ATPase subcomplex, Rpn2/Psmd1 subunit [Source:TAIR_LOCUS;Acc:AT1G04810]	F13M7.20	1350180	1355442	1	1	UniProtKB Gene Name
AT1G04820	7.63129	7.4187	8.55873	7.86957	7.8293	7.48178	7.11794	7.47634	6.79446	6.75739	6.86595	6.80594	-0.393233	0.634353	-1.06364	0.0637187	tubulin alpha-4 chain [Source:TAIR_LOCUS;Acc:AT1G04820]	TUA4	1356191	1358386	-1	1	TAIR Gene Name
AT1G04830	4.2318	4.84024	3.63663	4.23622	3.52702	4.51118	4.5906	4.2096	4.45366	4.60444	4.3133	4.45713	-0.0266198	0.982899	0.22091	0.811095	Ypt/Rab-GAP domain of gyp1p superfamily protein [Source:TAIR_LOCUS;Acc:AT1G04830]		1358574	1362019	-1	2
AT1G04840	0.472026	1.14371	-0.553335	0.354133	-0.853802	0.90454	1.18168	0.410808	0.518071	1.08423	0.895702	0.832668	0.0566743	0.980092	0.478535	0.753777	Tetratricopeptide repeat (TPR)-like superfamily protein [Source:TAIR_LOCUS;Acc:AT1G04840]	PCMP-H64	1362867	1364962	-1	1	UniProtKB Gene Name
AT1G04850	6.14971	6.3393	7.48725	6.65875	7.59614	6.75193	6.28887	6.87898	6.56657	6.53929	6.48264	6.5295	0.220225	0.890492	-0.129249	0.942488	ubiquitin-associated (UBA)/TS-N domain-containing protein [Source:TAIR_LOCUS;Acc:AT1G04850]	F13M7.16	1365118	1368844	-1	1	UniProtKB Gene Name
AT1G04860	5.05577	5.42181	4.40408	4.96056	4.58218	5.08345	5.43346	5.03303	5.14136	5.36103	5.30281	5.2684	0.0724743	0.949103	0.307843	0.678423	ubiquitin-specific protease 2 [Source:TAIR_LOCUS;Acc:AT1G04860]	UBP2	1369054	1373101	-1	1	TAIR Gene Name
AT1G04870	4.64408	4.06611	4.38216	4.36412	4.90481	4.41248	4.39417	4.57049	4.57588	4.35477	4.63489	4.52185	0.206372	0.695415	0.157729	0.790259	protein arginine methyltransferase 10 [Source:TAIR_LOCUS;Acc:AT1G04870]	PRMT10	1373234	1375762	-1	2	TAIR Gene Name
AT1G04900	3.82946	3.81101	2.648	3.42949	3.44651	3.74249	3.11476	3.43458	3.2776	3.62487	3.01441	3.30563	0.00508954	0.997057	-0.123866	0.912119	Protein of unknown function (DUF185) [Source:TAIR_LOCUS;Acc:AT1G04900]		1383841	1387895	1	1
AT1G04910	5.26012	5.44552	5.11285	5.27283	4.94541	5.02496	5.0522	5.00752	5.16299	5.28005	5.21995	5.221	-0.265303	0.346989	-0.0518305	0.92201	O-fucosyltransferase family protein [Source:TAIR_LOCUS;Acc:AT1G04910]		1387871	1391187	-1	1
AT1G04930	0.990084	2.47042	2.70311	2.05454	1.94349	1.90309	1.71941	1.85533	1.86907	2.37258	2.08937	2.11034	-0.199209	0.806349	0.0557995	0.958579	hydroxyproline-rich glycoprotein family protein [Source:TAIR_LOCUS;Acc:AT1G04930]	F13M7.8	1396291	1399053	-1	2	UniProtKB Gene Name
AT1G04940	2.59116	0.941501	3.30836	2.28034	2.69079	1.52372	1.06089	1.75846	1.20298	1.32265	0.685291	1.07031	-0.521875	0.75037	-1.21003	0.273935	translocon at the inner envelope membrane of chloroplasts 20 [Source:TAIR_LOCUS;Acc:AT1G04940]	TIC20	1399182	1400770	1	1	TAIR Gene Name
AT1G04945	2.98817	3.656	2.23343	2.9592	2.64171	3.60737	2.78415	3.01107	3.03515	3.69788	2.97343	3.23549	0.0518763	0.945322	0.27629	0.521273	HIT-type Zinc finger family protein [Source:TAIR_LOCUS;Acc:AT1G04945]		1399174	1403112	1	3
AT1G04950	4.9705	4.93536	4.15705	4.68764	4.03426	4.51118	4.66612	4.40386	4.63207	4.9268	4.6436	4.73416	-0.283784	0.706295	0.0465158	0.967638	TATA BOX ASSOCIATED FACTOR II 59 [Source:TAIR_LOCUS;Acc:AT1G04950]	TAFII59	1403085	1407501	-1	3	TAIR Gene Name
AT1G04960	4.70674	4.66039	4.34486	4.57066	4.59373	4.75177	4.69551	4.68034	4.7482	4.76226	4.91684	4.8091	0.109671	0.868605	0.238435	0.623097	Protein of unknown function (DUF1664) [Source:TAIR_LOCUS;Acc:AT1G04960]	F13M7.5	1407801	1410868	-1	2	UniProtKB Gene Name
AT1G04970	5.10406	4.98344	4.42091	4.83614	4.57055	5.27288	5.54499	5.12947	5.21407	5.46111	5.56474	5.41331	0.293331	0.659957	0.577166	0.23596	lipid-binding serum glycoprotein family protein [Source:TAIR_LOCUS;Acc:AT1G04970]		1411170	1413627	1	2
AT1G04980	3.90195	2.7064	3.39758	3.33531	4.70595	3.85025	3.44804	4.00141	3.44677	3.55489	3.66144	3.55437	0.666104	0.527863	0.219055	0.893901	PDI-like 2-2 [Source:TAIR_LOCUS;Acc:AT1G04980]	ATPDIL2-2	1413644	1416144	-1	1	TAIR Gene Name
AT1G04985	5.16067	5.67763	6.41664	5.75164	6.34176	5.66706	5.23988	5.74957	5.40812	5.44325	4.95579	5.26905	-0.00207643	0.998997	-0.48259	0.632076	unknown protein; Has 37 Blast hits to 37 proteins in 11 species: Archae - 0; Bacteria - 0; Metazoa - 0; Fungi - 0; Plants - 37; Viruses - 0; Other Eukaryotes - 0 (source: NCBI BLink). [Source:TAIR_LOCUS;Acc:AT1G04985]	F13M7.2	1416343	1418482	-1	1	UniProtKB Gene Name
AT1G04990	5.16959	6.11805	5.70332	5.66365	5.97326	6.44787	5.95546	6.12553	5.71803	6.3381	5.75051	5.93555	0.461876	0.247392	0.271895	0.593361	Zinc finger C-x8-C-x5-C-x3-H type family protein [Source:TAIR_LOCUS;Acc:AT1G04990]	AT1G04990	1419080	1421789	-1	2	UniProtKB Gene Name
AT1G05000	0.645802	-1.53178	0.208859	-0.225706	0.683707	1.99648	2.07159	1.58393	2.0189	2.56033	2.35382	2.31101	1.80963	0.221489	2.53672	0.0664893	Phosphotyrosine protein phosphatases superfamily protein [Source:TAIR_LOCUS;Acc:AT1G05000]	AT1G05000	1425593	1428782	1	2	UniProtKB Gene Name
AT1G05010	6.98673	8.20606	8.11946	7.77075	6.68546	8.80077	6.71644	7.40089	7.44982	9.02704	7.99182	8.15623	-0.369861	0.738696	0.385477	0.723546	ethylene-forming enzyme [Source:TAIR_LOCUS;Acc:AT1G05010]	EFE	1431190	1432858	-1	1	TAIR Gene Name
AT1G05030	4.8165	5.45823	4.59643	4.95705	3.84971	4.67004	4.23269	4.25081	4.40112	4.98426	4.39467	4.59335	-0.706242	0.0152898	-0.363703	0.247215	Major facilitator superfamily protein [Source:TAIR_LOCUS;Acc:AT1G05030]		1438152	1441417	-1	1
AT1G05055	2.88791	2.66967	3.18582	2.91447	3.0045	2.79028	2.54642	2.7804	2.48151	2.67593	2.87796	2.67846	-0.134062	0.881696	-0.236002	0.748242	general transcription factor II H2 [Source:TAIR_LOCUS;Acc:AT1G05055]	ATGTF2H2	1448718	1450887	-1	1	TAIR Gene Name
AT1G05060	4.83682	5.54291	5.0659	5.14855	5.29429	5.44983	5.03831	5.26081	5.13716	5.50568	5.10709	5.24998	0.112265	0.832942	0.101434	0.853676	unknown protein; Has 34 Blast hits to 34 proteins in 13 species: Archae - 0; Bacteria - 0; Metazoa - 0; Fungi - 0; Plants - 34; Viruses - 0; Other Eukaryotes - 0 (source: NCBI BLink). [Source:TAIR_LOCUS;Acc:AT1G05060]	T7A14.7	1451030	1452872	-1	1	UniProtKB Gene Name
AT1G05065	1.1136	1.44624	1.16976	1.2432	-0.0399955	0.404241	0.416239	0.260162	0.00790782	-0.0959252	-0.684933	-0.25765	-0.983042	0.267304	-1.50085	0.0630119	CLAVATA3/ESR-RELATED 20 [Source:TAIR_LOCUS;Acc:AT1G05065]	CLE20	1454969	1455220	-1	1	TAIR Gene Name
AT1G05070	4.15478	4.56434	4.95567	4.55827	4.83824	4.5505	4.11464	4.50113	4.24814	4.26179	3.92733	4.14575	-0.0571395	0.953949	-0.412517	0.422592	Protein of unknown function (DUF1068) [Source:TAIR_LOCUS;Acc:AT1G05070]	T7A14.6	1457063	1458744	-1	1	UniProtKB Gene Name
AT1G05090	0.705926	0.878077	0.330951	0.638318	0.0360176	0.0040461	1.06089	0.366984	0.539355	0.782149	0.875993	0.732499	-0.271334	0.807727	0.0941811	0.94809	dentin sialophosphoprotein-related [Source:TAIR_LOCUS;Acc:AT1G05090]	T7A14.3	1463202	1465622	1	1	UniProtKB Gene Name
AT1G05100	-3.68661	-1.22035	-0.233757	-1.71357	-0.161976	3.26135	2.1624	1.75393	1.16262	1.61025	2.6883	1.82039	3.4675	0.00627597	3.53396	0.0055704	mitogen-activated protein kinase kinase kinase 18 [Source:TAIR_LOCUS;Acc:AT1G05100]	MAPKKK18	1469610	1470881	1	1	TAIR Gene Name
AT1G05120	4.76326	4.94587	4.6988	4.80264	4.57887	4.78391	4.77785	4.71354	4.81084	4.92057	4.95463	4.89535	-0.0890994	0.840905	0.092705	0.832425	Helicase protein with RING/U-box domain [Source:TAIR_LOCUS;Acc:AT1G05120]	YUP8H12.27	1471406	1476078	-1	1	UniProtKB Gene Name
AT1G05140	6.24103	6.77453	6.64815	6.55457	6.53353	6.37367	6.5504	6.48587	6.14958	6.40107	6.04032	6.19699	-0.0687048	0.952055	-0.357583	0.603386	Peptidase M50 family protein [Source:TAIR_LOCUS;Acc:AT1G05140]	YUP8H12.25	1482548	1484056	1	1	UniProtKB Gene Name
AT1G05150	4.51697	4.57301	4.37724	4.48907	4.12529	4.37541	4.63744	4.37938	4.40815	4.56497	4.81394	4.59569	-0.109695	0.860394	0.106613	0.865262	Calcium-binding tetratricopeptide family protein [Source:TAIR_LOCUS;Acc:AT1G05150]		1484067	1486960	-1	1
AT1G05160	4.16375	3.96982	3.1464	3.75999	3.24213	3.31151	3.71104	3.42156	3.90402	3.82599	3.93918	3.88973	-0.338428	0.625337	0.129739	0.896219	cytochrome P450, family 88, subfamily A, polypeptide 3 [Source:TAIR_LOCUS;Acc:AT1G05160]	KAO1/CYP88A3	1487378	1490947	-1	1	TAIR Gene Name
AT1G05170	4.51137	4.73726	4.58792	4.61218	4.26338	4.48822	4.02283	4.25814	3.57051	4.34147	3.75026	3.88741	-0.354039	0.422582	-0.724771	0.0462103	Galactosyltransferase family protein [Source:TAIR_LOCUS;Acc:AT1G05170]	B3GALT2	1491111	1494248	-1	2	UniProtKB Gene Name
AT1G05180	5.39333	5.14629	5.09787	5.2125	5.00242	5.09107	5.12348	5.07232	5.13968	5.21399	5.36984	5.24117	-0.140174	0.70431	0.0286773	0.959048	NAD(P)-binding Rossmann-fold superfamily protein [Source:TAIR_LOCUS;Acc:AT1G05180]	AXR1	1498114	1501824	-1	3	TAIR Gene Name
AT1G05190	8.42974	7.89788	9.85724	8.72829	9.28325	7.86111	8.26231	8.46889	7.92191	7.60007	7.66485	7.72894	-0.2594	0.883053	-0.999343	0.314916	Ribosomal protein L6 family [Source:TAIR_LOCUS;Acc:AT1G05190]	emb2394	1502344	1503830	-1	1	TAIR Gene Name
AT1G05200	6.22485	6.56738	6.36306	6.38509	6.01426	5.74984	6.18066	5.98159	5.80903	6.25195	6.12337	6.06145	-0.403506	0.250686	-0.323645	0.400437	glutamate receptor 3.4 [Source:TAIR_LOCUS;Acc:AT1G05200]	ATGLR3.4	1504960	1509152	1	2	TAIR Gene Name
AT1G05205	2.71337	3.05127	4.72233	3.49566	4.42685	3.57765	2.76496	3.58982	3.18154	3.39344	2.84298	3.13932	0.0941643	0.970096	-0.356339	0.860394	unknown protein; Has 44 Blast hits to 44 proteins in 16 species: Archae - 0; Bacteria - 0; Metazoa - 0; Fungi - 0; Plants - 44; Viruses - 0; Other Eukaryotes - 0 (source: NCBI BLink). [Source:TAIR_LOCUS;Acc:AT1G05205]		1509103	1510281	-1	1
AT1G05210	1.73031	-0.798875	2.14566	1.0257	1.09562	0.404241	0.511557	0.670472	0.474524	-0.464572	-0.572031	-0.18736	-0.355225	0.792549	-1.21306	0.129551	Transmembrane protein 97, predicted [Source:TAIR_LOCUS;Acc:AT1G05210]	YUP8H12.18	1510404	1511683	1	1	UniProtKB Gene Name
AT1G05230	4.09795	4.84535	3.73915	4.22748	3.42109	4.494	4.18121	4.0321	3.92384	4.41441	4.01728	4.11851	-0.195382	0.662864	-0.108973	0.84818	homeodomain GLABROUS 2 [Source:TAIR_LOCUS;Acc:AT1G05230]	HDG2	1512896	1518805	-1	4	TAIR Gene Name
AT1G05270	4.79128	5.0037	5.15689	4.98396	5.52452	5.04472	4.94034	5.16986	5.20287	5.11389	5.00389	5.10689	0.185902	0.781068	0.122928	0.873444	TraB family protein [Source:TAIR_LOCUS;Acc:AT1G05270]	AT1G05270/YUP8H12_12	1531641	1534410	-1	1	UniProtKB Gene Name
AT1G05300	3.21546	3.45553	2.43228	3.03442	4.66428	4.55603	4.77306	4.66446	4.89097	4.80641	4.29866	4.66535	1.63003	0.0663734	1.63092	0.0662101	zinc transporter 5 precursor [Source:TAIR_LOCUS;Acc:AT1G05300]	ZIP5	1545106	1547849	-1	2	TAIR Gene Name
AT1G05310	1.09873	-1.08679	1.05531	0.355752	1.55413	-0.32842	1.69933	0.975012	1.45744	-0.187436	1.31693	0.86231	0.61926	0.675224	0.506558	0.754136	Pectin lyase-like superfamily protein [Source:TAIR_LOCUS;Acc:AT1G05310]	PME8	1550543	1552517	-1	1	UniProtKB Gene Name
AT1G05320	5.23227	4.33602	4.70472	4.75767	5.25614	4.30977	5.05417	4.87336	4.60913	4.33343	4.49914	4.48057	0.115692	0.920372	-0.277102	0.753829	FUNCTIONS IN: molecular_function unknown; INVOLVED IN: biological_process unknown; LOCATED IN: cellular_component unknown; EXPRESSED IN: fruit, egg cell; CONTAINS InterPro DOMAIN/s: Prefoldin (InterPro:IPR009053); BEST Arabidopsis thaliana protein m /.../s: unknown protein (TAIR:AT2G32240.1); Has 267650 Blast hits to 119772 proteins in 3899 species: Archae - 3706; Bacteria - 62589; Metazoa - 1065…	YUP8H12.6	1553603	1557733	1	3	UniProtKB Gene Name
AT1G05340	0.0453793	-0.243463	1.23437	0.34543	2.44145	5.3566	4.37534	4.0578	3.50603	3.03658	3.91538	3.486	3.71237	0.00229807	3.14057	0.00697042	unknown protein; FUNCTIONS IN: molecular_function unknown; INVOLVED IN: biological_process unknown; LOCATED IN: chloroplast; EXPRESSED IN: 14 plant structures; EXPRESSED DURING: 7 growth stages; BEST Arabidopsis thaliana protein match is: unknown pr /.../(TAIR:AT2G32210.1); Has 189 Blast hits to 189 proteins in 27 species: Archae - 0; Bacteria - 0; Metazoa - 0; Fungi - 21; Plants - 168; Viruses -…	YUP8H12.4	1558844	1559903	-1	1	UniProtKB Gene Name
AT1G05350	4.80624	4.11109	5.22056	4.71263	4.95828	4.40943	4.31733	4.56168	4.1938	4.17141	4.44204	4.26909	-0.15095	0.875165	-0.443544	0.466631	NAD(P)-binding Rossmann-fold superfamily protein [Source:TAIR_LOCUS;Acc:AT1G05350]		1560678	1564123	-1	1
AT1G05360	3.63439	2.82385	2.34612	2.93479	2.27495	2.90381	3.03694	2.73857	2.80889	2.7263	3.00088	2.84535	-0.196222	0.893277	-0.0894354	0.957445	BEST Arabidopsis thaliana protein match is: SNARE associated Golgi protein family (TAIR:AT4G14950.1); Has 332 Blast hits to 326 proteins in 115 species: Archae - 0; Bacteria - 11; Metazoa - 174; Fungi - 0; Plants - 74; Viruses - 0; Other Eukaryotes /.../source: NCBI BLink). [Source:TAIR_LOCUS;Acc:AT1G05360]	YUP8H12.2	1564598	1567465	1	1	UniProtKB Gene Name
AT1G05380	5.60025	5.44552	3.49523	4.847	3.41007	4.52535	5.50227	4.47923	4.97345	5.21617	5.33359	5.1744	-0.367768	0.850993	0.327403	0.871654	Acyl-CoA N-acyltransferase with RING/FYVE/PHD-type zinc finger protein [Source:TAIR_LOCUS;Acc:AT1G05380]	AT1G05380	1576863	1582614	1	2	UniProtKB Gene Name
AT1G05385	4.65556	4.02331	6.05562	4.9115	5.39172	3.86596	4.20273	4.48681	3.649	3.63803	4.13322	3.80675	-0.424692	0.782644	-1.10475	0.263325	photosystem II 11 kDa protein-related [Source:TAIR_LOCUS;Acc:AT1G05385]	LPA19	1582671	1583718	-1	1	TAIR Gene Name
AT1G05410	3.93791	3.63716	4.00007	3.85838	4.40832	3.59663	3.34204	3.78233	3.49011	3.46417	3.49144	3.4819	-0.0760509	0.945913	-0.376479	0.57109	Protein of unknown function (DUF1423) [Source:TAIR_LOCUS;Acc:AT1G05410]		1585371	1587778	-1	2
AT1G05430	4.97967	4.5914	4.50905	4.69337	4.31794	4.59012	4.68408	4.53071	4.48455	4.49227	4.47332	4.48338	-0.162661	0.773948	-0.209994	0.677952	unknown protein; Has 31 Blast hits to 31 proteins in 9 species: Archae - 0; Bacteria - 0; Metazoa - 0; Fungi - 0; Plants - 31; Viruses - 0; Other Eukaryotes - 0 (source: NCBI BLink). [Source:TAIR_LOCUS;Acc:AT1G05430]		1594057	1595818	-1	1
AT1G05460	4.09607	4.20661	3.91479	4.07249	4.05815	3.45818	4.01067	3.84233	3.78329	3.87677	3.50746	3.72251	-0.230155	0.744199	-0.349981	0.54517	P-loop containing nucleoside triphosphate hydrolases superfamily protein [Source:TAIR_LOCUS;Acc:AT1G05460]	SDE3	1601148	1605027	-1	1	TAIR Gene Name
AT1G05470	3.07052	2.20724	1.39391	2.22389	1.02199	1.60156	1.53903	1.38753	1.94988	1.58304	1.72167	1.75153	-0.836357	0.423101	-0.472357	0.731786	DNAse I-like superfamily protein [Source:TAIR_LOCUS;Acc:AT1G05470]	CVP2	1607357	1611703	-1	1	TAIR Gene Name
AT1G05500	5.91935	5.4728	5.79124	5.7278	5.50173	5.35265	5.4775	5.44396	5.23305	5.2342	5.49841	5.32189	-0.283839	0.342339	-0.405907	0.128499	Calcium-dependent lipid-binding (CaLB domain) family protein [Source:TAIR_LOCUS;Acc:AT1G05500]	SYTE	1624955	1629224	1	1	TAIR Gene Name
AT1G05520	5.08437	5.52523	3.98405	4.86455	4.16105	4.91434	5.17426	4.74988	5.00331	5.55006	5.36284	5.3054	-0.114669	0.930874	0.440851	0.598043	Sec23/Sec24 protein transport family protein [Source:TAIR_LOCUS;Acc:AT1G05520]		1630900	1635711	-1	1
AT1G05540	2.2033	2.63197	1.62097	2.15208	0.533532	2.02899	1.27967	1.28073	0.8427	1.88719	0.411601	1.04716	-0.871352	0.542377	-1.10492	0.385615	Protein of unknown function (DUF295) [Source:TAIR_LOCUS;Acc:AT1G05540]		1639286	1640811	1	1
AT1G05560	3.75315	4.47732	4.90846	4.37964	4.09788	4.92184	3.40533	4.14168	3.41338	3.81059	3.46871	3.56422	-0.237962	0.895031	-0.815422	0.455089	UDP-glucosyltransferase 75B1 [Source:TAIR_LOCUS;Acc:AT1G05560]	UGT1/UGT75B1	1645498	1647147	-1	1	TAIR Gene Name
AT1G05562	3.90623	5.48331	5.19543	4.86165	4.8045	5.00794	4.46118	4.75787	4.07497	4.98681	3.77164	4.27781	-0.103781	0.963375	-0.583848	0.691535	Potential natural antisense gene, locus overlaps with AT1G05560 [Source:TAIR_LOCUS;Acc:AT1G05562]		1645875	1647162	1	1
AT1G05570	6.65931	6.69578	4.85079	6.06863	5.5783	5.95788	7.09802	6.2114	6.65015	7.092	7.44638	7.06285	0.142769	0.950169	0.994215	0.399673	callose synthase 1 [Source:TAIR_LOCUS;Acc:AT1G05570]	CALS1	1647706	1659437	-1	2	TAIR Gene Name
AT1G05575	1.74948	0.128869	3.27214	1.71683	3.75666	0.676095	1.01285	1.8152	3.62493	1.2552	2.32511	2.40175	0.0983714	0.971469	0.684917	0.69799	unknown protein; FUNCTIONS IN: molecular_function unknown; INVOLVED IN: anaerobic respiration; LOCATED IN: endomembrane system; EXPRESSED IN: 17 plant structures; EXPRESSED DURING: 9 growth stages; BEST Arabidopsis thaliana protein match is: unknown /.../in (TAIR:AT2G31945.1); Has 63 Blast hits to 63 proteins in 10 species: Archae - 0; Bacteria - 0; Metazoa - 0; Fungi - 0; Plants - 63; Viruses - …	AT1G05575/F3F20.22	1661691	1662187	-1	1	UniProtKB Gene Name
AT1G05590	4.27047	4.29016	4.72428	4.42831	4.34545	3.92286	4.04286	4.10372	3.78111	3.86191	3.585	3.74268	-0.324581	0.362339	-0.68563	0.0250675	beta-hexosaminidase 2 [Source:TAIR_LOCUS;Acc:AT1G05590]	HEXO2	1669350	1671876	1	1	TAIR Gene Name
AT1G05600	3.13026	2.5735	2.45991	2.72122	2.61654	2.55455	2.95891	2.71	2.72472	2.40391	2.65987	2.59617	-0.0112227	0.991202	-0.125056	0.878447	Tetratricopeptide repeat (TPR)-like superfamily protein [Source:TAIR_LOCUS;Acc:AT1G05600]		1671936	1673856	1	2
AT1G05620	3.49366	3.05838	3.24571	3.26592	2.61654	3.80206	3.45403	3.29088	3.84701	3.38825	3.74216	3.65914	0.0249607	0.988982	0.393224	0.74436	uridine-ribohydrolase 2 [Source:TAIR_LOCUS;Acc:AT1G05620]	URH2	1679158	1681710	1	2	TAIR Gene Name
AT1G05630	4.96333	4.48522	4.64851	4.69902	3.53042	3.24768	4.11464	3.63091	4.03184	3.75936	4.27829	4.02316	-1.06811	0.0748742	-0.675858	0.317376	Endonuclease/exonuclease/phosphatase family protein [Source:TAIR_LOCUS;Acc:AT1G05630]	AT5PTASE13	1682318	1687363	1	2	TAIR Gene Name
AT1G05640	0.705926	1.20953	0.121415	0.678958	0.862607	1.05477	-0.570433	0.448983	0.335289	0.976523	0.267605	0.526472	-0.229975	0.789299	-0.152486	0.877269	Ankyrin repeat family protein [Source:TAIR_LOCUS;Acc:AT1G05640]	F3F20.9	1687436	1689501	-1	1	UniProtKB Gene Name
AT1G05670	3.31856	3.27828	2.51365	3.03683	2.61018	2.57665	3.10335	2.76339	2.83024	2.98931	3.11412	2.97789	-0.273436	0.720143	-0.0589398	0.958539	Pentatricopeptide repeat (PPR-like) superfamily protein [Source:TAIR_LOCUS;Acc:AT1G05670]		1697587	1701025	-1	2
AT1G05675	0.854989	-0.0764442	1.44952	0.742688	1.85008	0.379078	-0.838081	0.463691	3.28378	1.28932	1.87822	2.15044	-0.278996	0.903422	1.40775	0.239014	UDP-Glycosyltransferase superfamily protein [Source:TAIR_LOCUS;Acc:AT1G05675]	UGT74E1	1701116	1702749	-1	1	UniProtKB Gene Name
AT1G05680	-2.79348	-2.86833	-1.8424	-2.5014	-0.205007	2.14471	0.821568	0.920425	2.75631	1.42847	2.60125	2.26201	3.42183	0.161069	4.76341	0.0416371	Uridine diphosphate glycosyltransferase 74E2, favor IBA as substrate [Source:TAIR_LOCUS;Acc:AT1G05680]	UGT74E2	1703092	1704691	-1	1	TAIR Gene Name
AT1G05690	2.28441	2.81548	1.16976	2.08988	2.94995	2.52073	2.63363	2.70144	2.48691	2.91535	2.42992	2.61073	0.611552	0.309665	0.520843	0.420012	BTB and TAZ domain protein 3 [Source:TAIR_LOCUS;Acc:AT1G05690]	BT3	1707011	1709347	1	1	TAIR Gene Name
AT1G05710	0.763644	0.650139	-0.553335	0.286816	2.23431	3.51061	1.87971	2.54154	1.47946	2.63256	1.93635	2.01613	2.25472	0.00109965	1.72931	0.00657221	basic helix-loop-helix (bHLH) DNA-binding superfamily protein [Source:TAIR_LOCUS;Acc:AT1G05710]	BHLH-ALPHA/AtbHLH153	1714950	1717276	1	5	UniProtKB Gene Name
AT1G05720	4.87769	4.63343	5.0174	4.84284	5.17452	4.97741	4.63876	4.93023	4.68036	4.74522	4.82163	4.74907	0.087387	0.907585	-0.0937717	0.899047	selenoprotein family protein [Source:TAIR_LOCUS;Acc:AT1G05720]	AT1G05720/F3F20_17	1717447	1718909	-1	1	UniProtKB Gene Name
AT1G05730	0.0760776	0.591966	0.645929	0.437991	-0.00149531	0.850749	-0.0442445	0.268336	-0.261319	0.630258	0.438748	0.269229	-0.169654	0.913516	-0.168762	0.914263	Eukaryotic protein of unknown function (DUF842) [Source:TAIR_LOCUS;Acc:AT1G05730]	F3F20.18	1718555	1720303	1	1	UniProtKB Gene Name
AT1G05750	3.0201	2.9011	1.53775	2.48632	1.95351	2.77604	2.89418	2.54124	2.39218	2.84876	2.74895	2.6633	0.0549249	0.969462	0.17698	0.882743	Tetratricopeptide repeat (TPR)-like superfamily protein [Source:TAIR_LOCUS;Acc:AT1G05750]	PDE247	1721509	1724734	1	1	TAIR Gene Name
AT1G05760	1.72062	0.0151663	1.37489	1.03689	-0.0795364	-0.208828	-1.02633	-0.43823	0.496464	-1.0173	0.107578	-0.137751	-1.47512	0.0325019	-1.17464	0.0929863	Mannose-binding lectin superfamily protein [Source:TAIR_LOCUS;Acc:AT1G05760]	RTM1	1723734	1724486	-1	1	TAIR Gene Name
AT1G05780	2.02596	1.73217	2.79302	2.18371	2.42708	1.83114	2.04	2.09941	1.55397	1.68892	1.68821	1.6437	-0.0843081	0.942391	-0.540012	0.367802	Vacuolar ATPase assembly integral membrane protein VMA21-like domain [Source:TAIR_LOCUS;Acc:AT1G05780]		1726608	1728404	1	1
AT1G05785	2.91788	2.81967	2.36571	2.70109	2.57796	3.06862	2.28872	2.6451	2.56046	2.90082	2.80195	2.75441	-0.0559889	0.949668	0.0533223	0.95234	Got1/Sft2-like vescicle transport protein family [Source:TAIR_LOCUS;Acc:AT1G05785]		1730249	1732626	1	2
AT1G05790	4.76208	4.88561	4.54463	4.73077	4.45963	4.64562	5.09692	4.73406	4.75371	4.9268	4.93704	4.87251	0.00328171	0.997081	0.141741	0.820006	lipase class 3 family protein [Source:TAIR_LOCUS;Acc:AT1G05790]		1732871	1737489	1	2
AT1G05805	6.01456	5.73037	6.36242	6.03579	6.00365	5.33992	6.29347	5.87901	6.29745	5.66121	6.00088	5.98651	-0.156773	0.87667	-0.0492725	0.967479	basic helix-loop-helix (bHLH) DNA-binding superfamily protein [Source:TAIR_LOCUS;Acc:AT1G05805]	BHLH128/AtbHLH128	1744773	1747693	1	1	UniProtKB Gene Name
AT1G05810	2.62788	2.42703	3.10588	2.72026	2.2507	1.83114	2.25472	2.11219	2.42633	1.67181	2.43665	2.17826	-0.608077	0.421061	-0.542003	0.497679	RAB GTPase homolog A5E [Source:TAIR_LOCUS;Acc:AT1G05810]	ARA	1748314	1749460	1	1	TAIR Gene Name
AT1G05820	0.782382	0.25939	0.291374	0.444382	-0.723679	0.353465	-0.224625	-0.198279	0.234288	0.334726	0.567294	0.378769	-0.642661	0.626431	-0.0656126	0.976698	SIGNAL PEPTIDE PEPTIDASE-LIKE 5 [Source:TAIR_LOCUS;Acc:AT1G05820]	SPPL5	1749682	1753990	1	2	TAIR Gene Name
AT1G05830	5.41826	5.30961	4.46565	5.0645	4.4952	4.62867	5.14678	4.75688	5.06916	5.13248	5.07744	5.09303	-0.30762	0.626249	0.0285216	0.978918	trithorax-like protein 2 [Source:TAIR_LOCUS;Acc:AT1G05830]	ATX2	1754244	1761817	1	2	TAIR Gene Name
AT1G05840	5.53406	4.88661	4.66681	5.02916	4.78877	4.57522	5.18511	4.8497	5.30209	4.90892	5.39495	5.20199	-0.17946	0.835338	0.172829	0.843073	Eukaryotic aspartyl protease family protein [Source:TAIR_LOCUS;Acc:AT1G05840]	T20M3.11	1762734	1766281	-1	1	UniProtKB Gene Name
AT1G05850	9.04076	9.54667	9.62855	9.40533	8.87231	9.11763	8.86783	8.95259	8.57298	8.42552	8.44319	8.48056	-0.452734	0.199575	-0.924764	0.00703343	Chitinase family protein [Source:TAIR_LOCUS;Acc:AT1G05850]	POM1	1766503	1768695	-1	1	TAIR Gene Name
AT1G05860	2.86171	3.48218	4.01277	3.45222	3.28696	2.89066	3.03694	3.07152	3.00548	3.3272	3.1716	3.16809	-0.380698	0.491922	-0.284126	0.658312	unknown protein; FUNCTIONS IN: molecular_function unknown; INVOLVED IN: biological_process unknown; LOCATED IN: chloroplast; EXPRESSED IN: 20 plant structures; EXPRESSED DURING: 11 growth stages; BEST Arabidopsis thaliana protein match is: unknown p /.../ (TAIR:AT2G31600.1); Has 101 Blast hits to 100 proteins in 32 species: Archae - 0; Bacteria - 0; Metazoa - 28; Fungi - 2; Plants - 66; Viruses -…	T20M3.13	1769014	1771115	1	1	UniProtKB Gene Name
AT1G05870	4.35897	5.1496	4.52917	4.67924	4.38766	4.72749	3.81722	4.31079	3.7658	4.76823	3.77164	4.10189	-0.368454	0.490274	-0.577355	0.192957	Protein of unknown function (DUF1685) [Source:TAIR_LOCUS;Acc:AT1G05870]	T20M3.14	1771457	1773293	-1	4	UniProtKB Gene Name
AT1G05880	-3.68661	-3.75649	-5.99094	-4.47802	0.274696	-1.90412	-1.8079	-1.14578	-1.30644	-1.82637	-1.16903	-1.43395	3.33224	0.0209792	3.04407	0.0341372	RING/U-box superfamily protein [Source:TAIR_LOCUS;Acc:AT1G05880]	ATARI12	1775643	1778553	1	2	TAIR Gene Name
AT1G05890	6.06757	6.21909	6.12219	6.13629	6.46201	6.12251	6.33582	6.30678	6.49801	6.52655	6.32615	6.45023	0.170494	0.742687	0.313949	0.416854	RING/U-box superfamily protein [Source:TAIR_LOCUS;Acc:AT1G05890]	ARI5	1779256	1784529	1	2	TAIR Gene Name
AT1G05900	4.80853	4.37622	4.57292	4.58589	4.29596	4.29163	4.56036	4.38265	4.34071	4.2856	4.23859	4.2883	-0.203235	0.64495	-0.297586	0.413612	endonuclease III 2 [Source:TAIR_LOCUS;Acc:AT1G05900]	ATNTH2	1786856	1789676	1	2	TAIR Gene Name
AT1G05910	4.70674	5.02547	4.09268	4.6083	4.33373	4.31631	4.85573	4.50192	4.49777	4.88626	4.99258	4.79221	-0.106375	0.912876	0.183908	0.825056	cell division cycle protein 48-related / CDC48-related [Source:TAIR_LOCUS;Acc:AT1G05910]		1790224	1796647	1	1
AT1G05940	5.18111	5.63882	5.11285	5.31093	5.09742	5.39478	5.72974	5.40731	5.48589	5.77029	5.67623	5.64414	0.0963823	0.897903	0.333212	0.464148	cationic amino acid transporter 9 [Source:TAIR_LOCUS;Acc:AT1G05940]	CAT9	1801162	1803984	-1	1	TAIR Gene Name
AT1G05950	2.45763	1.79342	1.85934	2.0368	1.94349	1.4414	1.13756	1.50748	1.8439	1.81114	1.72167	1.79224	-0.529312	0.399077	-0.244557	0.786972	unknown protein; Has 50 Blast hits to 45 proteins in 14 species: Archae - 5; Bacteria - 0; Metazoa - 4; Fungi - 0; Plants - 34; Viruses - 0; Other Eukaryotes - 7 (source: NCBI BLink). [Source:TAIR_LOCUS;Acc:AT1G05950]		1804401	1807471	-1	1
AT1G05960	5.93042	6.33786	5.41721	5.89516	5.1251	5.65493	5.63736	5.47246	5.46668	5.98596	5.92276	5.7918	-0.422701	0.51834	-0.103366	0.924543	ARM repeat superfamily protein [Source:TAIR_LOCUS;Acc:AT1G05960]	T21E18.2	1807973	1815474	-1	2	UniProtKB Gene Name
AT1G05970	2.13203	1.84391	3.02133	2.33242	3.20865	2.22402	2.177	2.53655	1.94988	1.92375	1.95522	1.94295	0.20413	0.801793	-0.38947	0.516926	RNA-binding (RRM/RBD/RNP motifs) family protein [Source:TAIR_LOCUS;Acc:AT1G05970]	T21E18.3	1816056	1817282	-1	2	UniProtKB Gene Name
AT1G06000	2.27782	6.46713	4.87729	4.54075	3.4284	6.49932	3.32905	4.41892	2.77405	5.09664	2.85306	3.57458	-0.121823	0.956544	-0.966162	0.398144	UDP-Glycosyltransferase superfamily protein [Source:TAIR_LOCUS;Acc:AT1G06000]	UGT89C1	1820308	1821894	-1	1	UniProtKB Gene Name
AT1G06002	2.0338	3.92011	6.2626	4.07217	5.13307	4.98357	4.01879	4.71181	3.78329	4.31857	3.2191	3.77365	0.63964	0.793892	-0.298518	0.921994	Potential natural antisense gene, locus overlaps with AT1G06000 [Source:TAIR_LOCUS;Acc:AT1G06002]		1820977	1821918	1	1
AT1G06010	3.47362	2.28835	4.57507	3.44568	3.6697	2.69251	2.67533	3.01251	2.6157	2.35131	2.81232	2.59311	-0.433167	0.721423	-0.852571	0.331741	unknown protein; Has 25 Blast hits to 25 proteins in 9 species: Archae - 0; Bacteria - 0; Metazoa - 0; Fungi - 0; Plants - 25; Viruses - 0; Other Eukaryotes - 0 (source: NCBI BLink). [Source:TAIR_LOCUS;Acc:AT1G06010]	T21E18.6	1822618	1823997	1	1	UniProtKB Gene Name
AT1G06040	8.09141	7.84285	8.17628	8.03685	8.24901	7.8206	7.71343	7.92768	7.50359	7.55693	7.38401	7.48151	-0.109169	0.899324	-0.555338	0.214251	B-box zinc finger family protein [Source:TAIR_LOCUS;Acc:AT1G06040]	STO/BBX24	1828413	1829890	-1	2	TAIR Gene Name
AT1G06050	3.79297	2.97439	3.14068	3.30268	3.16131	3.11458	3.3225	3.19946	3.71203	2.99274	3.67285	3.45921	-0.103215	0.897005	0.156526	0.824498	Protein of unknown function (DUF1336) [Source:TAIR_LOCUS;Acc:AT1G06050]	T21E18.10	1830605	1832555	-1	1	UniProtKB Gene Name
AT1G06060	4.71041	4.49568	5.05509	4.75373	5.05489	4.43067	4.4417	4.64242	4.66288	4.55694	4.54325	4.58769	-0.111307	0.830415	-0.166038	0.706006	LisH and RanBPM domains containing protein [Source:TAIR_LOCUS;Acc:AT1G06060]	T21E18.11	1832943	1834861	1	1	UniProtKB Gene Name
AT1G06070	4.00127	3.90643	3.42615	3.77795	3.34596	3.31151	4.02081	3.55943	3.75255	3.75735	4.0262	3.84537	-0.218526	0.806606	0.0674141	0.954094	Basic-leucine zipper (bZIP) transcription factor family protein [Source:TAIR_LOCUS;Acc:AT1G06070]	T21E18.12	1834829	1837648	-1	1	UniProtKB Gene Name
AT1G06080	1.77777	-6.54837	1.41268	-1.11931	-6.35615	-6.40126	-1.69699	-4.81813	-2.11414	-6.65232	-1.65314	-3.4732	-3.69883	0.177836	-2.35389	0.473882	delta 9 desaturase 1 [Source:TAIR_LOCUS;Acc:AT1G06080]	ADS1	1843568	1846302	1	1	TAIR Gene Name
AT1G06110	5.21254	4.76991	5.65986	5.2141	5.55464	4.74936	5.31833	5.20744	5.33758	4.8436	5.41116	5.19745	-0.00666326	0.99313	-0.016656	0.982093	SKP1/ASK-interacting protein 16 [Source:TAIR_LOCUS;Acc:AT1G06110]	SKIP16	1853077	1855031	-1	1	TAIR Gene Name
AT1G06130	5.30212	5.42454	5.78278	5.50314	5.57326	5.33191	5.15876	5.35464	5.60456	5.43767	5.44885	5.49703	-0.148503	0.796792	-0.0061171	0.994156	glyoxalase 2-4 [Source:TAIR_LOCUS;Acc:AT1G06130]	GLX2-4	1857767	1860730	-1	2	TAIR Gene Name
AT1G06140	0.625191	0.794638	0.0756535	0.498494	0.395418	1.03884	0.511557	0.648605	0.335289	0.93395	0.141039	0.470093	0.150111	0.884941	-0.0284013	0.981868	Pentatricopeptide repeat (PPR) superfamily protein [Source:TAIR_LOCUS;Acc:AT1G06140]	PCMP-E61	1864796	1866472	1	1	UniProtKB Gene Name
AT1G06150	2.37362	2.12126	1.88659	2.12715	2.15819	1.78426	1.58355	1.842	1.77454	2.08087	1.34585	1.73375	-0.285154	0.494103	-0.3934	0.275395	basic helix-loop-helix (bHLH) DNA-binding superfamily protein [Source:TAIR_LOCUS;Acc:AT1G06150]	EMB1444	1867015	1873718	-1	2	TAIR Gene Name
AT1G06160	0.583063	-1.08679	1.12505	0.207109	3.42109	1.61235	1.43354	2.15566	5.02348	4.04568	5.17266	4.74727	1.94855	0.249811	4.54016	0.00511364	octadecanoid-responsive Arabidopsis AP2/ERF 59 [Source:TAIR_LOCUS;Acc:AT1G06160]	ORA59	1883004	1883934	1	1	TAIR Gene Name
AT1G06180	0.247698	2.15494	-0.417027	0.66187	0.707303	2.31899	0.94619	1.32416	2.59085	2.7427	2.0808	2.47145	0.662291	0.645485	1.80958	0.0671182	myb domain protein 13 [Source:TAIR_LOCUS;Acc:AT1G06180]	ATMYB13	1889408	1891158	1	1	TAIR Gene Name
AT1G06190	6.59683	6.41578	6.74172	6.58478	6.68113	6.11508	6.2943	6.3635	6.11104	5.93544	5.79603	5.94751	-0.221275	0.690123	-0.637273	0.08118	Rho termination factor [Source:TAIR_LOCUS;Acc:AT1G06190]	RHON1	1892273	1894148	-1	2	UniProtKB Gene Name
AT1G06200	6.03668	5.86388	6.36623	6.08893	6.12621	5.89092	5.76389	5.927	5.8926	5.67287	5.80186	5.78911	-0.161926	0.70033	-0.299821	0.336512	Peptidase S24/S26A/S26B/S26C family protein [Source:TAIR_LOCUS;Acc:AT1G06200]	F9P14.6	1894336	1896935	-1	1	UniProtKB Gene Name
AT1G06210	4.99682	5.49634	5.10987	5.20101	4.97356	5.28122	5.22507	5.15995	4.81506	5.24847	4.91923	4.99425	-0.0410571	0.943875	-0.206754	0.542148	ENTH/VHS/GAT family protein [Source:TAIR_LOCUS;Acc:AT1G06210]	F9P14.7	1897203	1899208	1	2	UniProtKB Gene Name
AT1G06220	6.03278	6.05135	5.27759	5.78724	5.55037	5.78365	5.93901	5.75768	5.68636	5.95422	5.88968	5.84342	-0.0295632	0.9711	0.0561774	0.941916	Ribosomal protein S5/Elongation factor G/III/V family protein [Source:TAIR_LOCUS;Acc:AT1G06220]	MEE5	1899964	1904873	1	2	TAIR Gene Name
AT1G06230	6.1233	6.27707	5.25748	5.88595	5.73323	5.78071	6.34067	5.95154	6.12583	6.13413	6.11611	6.12535	0.0655856	0.955137	0.239403	0.778888	global transcription factor group E4 [Source:TAIR_LOCUS;Acc:AT1G06230]	GTE4	1906963	1910848	1	3	TAIR Gene Name
AT1G06240	3.60311	4.42629	4.06551	4.03164	4.10248	3.99197	4.06457	4.05301	3.75698	4.09254	3.45555	3.76836	0.0213699	0.981906	-0.263281	0.643765	Protein of unknown function DUF455 [Source:TAIR_LOCUS;Acc:AT1G06240]	AT1G06240	1911122	1913205	1	1	UniProtKB Gene Name
AT1G06265	3.69499	3.45822	3.53079	3.56133	2.36057	2.64624	3.3772	2.79467	3.01668	2.88244	3.12248	3.0072	-0.766664	0.121989	-0.554134	0.309882	other RNA [Source:TAIR_LOCUS;Acc:AT1G06265]		1914943	1917661	-1	2
AT1G06270	1.24099	2.72442	1.58825	1.85122	1.26493	2.53209	1.75877	1.85193	1.64439	2.36199	1.77577	1.92738	0.000708898	0.999359	0.0761612	0.926805	Pentatricopeptide repeat (PPR) superfamily protein [Source:TAIR_LOCUS;Acc:AT1G06270]		1918088	1919760	-1	1
AT1G06290	5.8948	5.43269	4.55558	5.29436	4.64538	5.46602	5.98574	5.36571	5.86965	5.76188	6.28513	5.97222	0.0713542	0.967283	0.677864	0.457011	acyl-CoA oxidase 3 [Source:TAIR_LOCUS;Acc:AT1G06290]	ACX3	1922352	1926278	1	1	TAIR Gene Name
AT1G06380	2.90083	3.29943	3.48168	3.22731	4.11848	3.37262	2.49495	3.32868	2.69707	3.32991	2.82261	2.94986	0.101373	0.957388	-0.277446	0.858539	Ribosomal protein L1p/L10e family [Source:TAIR_LOCUS;Acc:AT1G06380]	T2D23.8	1945124	1946076	1	1	UniProtKB Gene Name
AT1G06390	5.68112	5.13965	5.23022	5.35033	5.09275	5.11929	5.25025	5.1541	5.43974	5.14855	5.38115	5.32315	-0.196234	0.722224	-0.0271849	0.974259	GSK3/SHAGGY-like protein kinase 1 [Source:TAIR_LOCUS;Acc:AT1G06390]	GSK1	1946788	1950860	1	2	TAIR Gene Name
AT1G06400	5.04902	5.33668	6.78327	5.72299	6.918	5.87726	5.66086	6.15204	5.76155	5.61085	5.73094	5.70111	0.42905	0.713673	-0.0218763	0.990604	Ras-related small GTP-binding family protein [Source:TAIR_LOCUS;Acc:AT1G06400]	ARA2	1950844	1952785	-1	1	TAIR Gene Name
AT1G06410	6.94028	6.5606	7.39268	6.96452	6.93236	6.34066	7.14939	6.80747	6.80207	6.54648	7.14767	6.83207	-0.157053	0.732993	-0.132448	0.789548	trehalose-phosphatase/synthase 7 [Source:TAIR_LOCUS;Acc:AT1G06410]	ATTPS7	1954850	1958756	1	1	TAIR Gene Name
AT1G06430	6.96202	7.2726	7.24889	7.16117	6.94163	7.02677	7.32653	7.09831	6.77407	6.83687	6.77088	6.79394	-0.0628628	0.944674	-0.367228	0.454419	FTSH protease 8 [Source:TAIR_LOCUS;Acc:AT1G06430]	FTSH8	1960058	1963011	-1	1	TAIR Gene Name
AT1G06440	0.763644	1.43529	0.677084	0.958673	1.70366	1.4414	1.3328	1.49262	0.808127	1.44873	1.04435	1.1004	0.533949	0.585183	0.141729	0.927492	Ubiquitin carboxyl-terminal hydrolase family protein [Source:TAIR_LOCUS;Acc:AT1G06440]		1963380	1965051	-1	1
AT1G06460	8.80633	9.78238	9.62862	9.40578	9.29571	9.5482	9.16515	9.33636	8.93586	9.41751	8.95202	9.1018	-0.0694218	0.943696	-0.303979	0.620209	alpha-crystallin domain 32.1 [Source:TAIR_LOCUS;Acc:AT1G06460]	ACD32.1	1967087	1969561	-1	1	TAIR Gene Name
AT1G06470	5.48842	5.40186	5.43047	5.44025	5.19644	5.0844	5.32651	5.20245	5.00884	5.29249	5.33895	5.21343	-0.237796	0.494762	-0.226823	0.525137	Nucleotide/sugar transporter family protein [Source:TAIR_LOCUS;Acc:AT1G06470]	AT1G06470	1969729	1973767	1	2	UniProtKB Gene Name
AT1G06490	1.96164	0.861773	1.3361	1.38651	-0.161976	-0.552982	0.314168	-0.133597	0.699078	-0.808465	0.915145	0.268586	-1.5201	0.0671502	-1.11792	0.204546	glucan synthase-like 7 [Source:TAIR_LOCUS;Acc:AT1G06490]	ATGSL07	1978762	1989409	1	1	TAIR Gene Name
AT1G06500	3.64723	3.64661	4.53361	3.94248	5.04044	3.76661	3.25881	4.02195	3.74587	3.56181	3.24227	3.51665	0.0794707	0.964903	-0.425829	0.725561	unknown protein; Has 25 Blast hits to 25 proteins in 10 species: Archae - 0; Bacteria - 0; Metazoa - 0; Fungi - 0; Plants - 25; Viruses - 0; Other Eukaryotes - 0 (source: NCBI BLink). [Source:TAIR_LOCUS;Acc:AT1G06500]		1989479	1990730	1	4
AT1G06510	5.25677	4.69708	5.56888	5.17424	5.34922	4.48678	4.80036	4.87879	4.7777	4.47411	4.67791	4.64324	-0.295456	0.564749	-0.531004	0.183219	unknown protein; FUNCTIONS IN: molecular_function unknown; INVOLVED IN: biological_process unknown; LOCATED IN: chloroplast; EXPRESSED IN: 21 plant structures; EXPRESSED DURING: 13 growth stages; Has 376 Blast hits to 369 proteins in 152 species: Ar /.../ 5; Bacteria - 113; Metazoa - 105; Fungi - 46; Plants - 27; Viruses - 2; Other Eukaryotes - 78 (source: NCBI BLink). [Source:TAIR_LOCUS;Acc:AT1G…		1992333	1993840	1	1
AT1G06515	4.26048	3.67919	4.461	4.13356	3.99274	3.74249	3.753	3.82941	4.03366	3.74119	3.71484	3.8299	-0.304153	0.53724	-0.303664	0.538193	Protein of unknown function (DUF3317) [Source:TAIR_LOCUS;Acc:AT1G06515]		1990634	1992228	-1	2
AT1G06520	0.326413	-1.81969	-2.47982	-1.32437	2.02179	3.59394	3.78427	3.13333	0.973171	0.990438	2.36796	1.44385	4.4577	0.000555795	2.76822	0.0133748	glycerol-3-phosphate acyltransferase 1 [Source:TAIR_LOCUS;Acc:AT1G06520]	ATGPAT1	1993978	1996112	-1	1	TAIR Gene Name
AT1G06530	4.78549	5.80601	6.97034	5.85395	7.39468	6.08214	5.47013	6.31565	5.51779	5.83253	5.50717	5.61916	0.461698	0.830674	-0.234786	0.927492	Tropomyosin-related [Source:TAIR_LOCUS;Acc:AT1G06530]	UQI7	2001594	2002596	1	1	UniProtKB Gene Name
AT1G06550	5.3366	5.10003	4.16562	4.86742	4.11621	5.51916	4.69803	4.7778	4.7515	4.86694	4.50393	4.70746	-0.0896182	0.950718	-0.159957	0.902399	ATP-dependent caseinolytic (Clp) protease/crotonase family protein [Source:TAIR_LOCUS;Acc:AT1G06550]		2003627	2007190	-1	1
AT1G06560	3.76497	4.01787	2.60732	3.46339	3.36891	3.93992	3.40842	3.57242	3.60045	3.89878	3.13491	3.54472	0.109031	0.901828	0.081328	0.930898	NOL1/NOP2/sun family protein [Source:TAIR_LOCUS;Acc:AT1G06560]		2007615	2012006	1	1
AT1G06570	4.40353	4.78276	5.35666	4.84765	5.3265	5.32466	5.67439	5.44185	5.59362	5.01882	5.58293	5.39846	0.594201	0.511783	0.55081	0.558495	phytoene desaturation 1 [Source:TAIR_LOCUS;Acc:AT1G06570]	PDS1	2011885	2013545	-1	2	TAIR Gene Name
AT1G06580	1.877	1.74108	1.10217	1.57342	1.16571	1.74563	1.51625	1.47586	1.63462	1.61921	1.44273	1.56552	-0.0975553	0.902378	-0.00790039	0.993433	Pentatricopeptide repeat (PPR) superfamily protein [Source:TAIR_LOCUS;Acc:AT1G06580]		2014003	2016054	-1	1
AT1G06590	3.33134	2.63197	1.78893	2.58408	2.1319	2.20992	2.69573	2.34585	2.82173	2.73452	3.21129	2.92252	-0.238231	0.812572	0.338432	0.695018	unknown protein; Has 380 Blast hits to 268 proteins in 109 species: Archae - 0; Bacteria - 0; Metazoa - 245; Fungi - 73; Plants - 49; Viruses - 0; Other Eukaryotes - 13 (source: NCBI BLink). [Source:TAIR_LOCUS;Acc:AT1G06590]	APC5	2016308	2024662	-1	1	UniProtKB Gene Name
AT1G06620	0.725423	0.15594	3.76182	1.54773	3.04767	4.58607	3.30933	3.64769	3.93169	4.40549	3.88384	4.07367	2.09996	0.0989904	2.52594	0.0436705	2-oxoglutarate (2OG) and Fe(II)-dependent oxygenase superfamily protein [Source:TAIR_LOCUS;Acc:AT1G06620]		2025601	2027271	1	1
AT1G06630	4.79128	4.26285	4.39194	4.48202	3.80534	4.00419	4.75861	4.18938	4.34218	4.37319	4.75089	4.48875	-0.292648	0.674947	0.00672701	0.99545	F-box/RNI-like superfamily protein [Source:TAIR_LOCUS;Acc:AT1G06630]		2027739	2031388	1	3
AT1G06640	4.84909	5.79815	6.81343	5.82023	5.43672	6.20175	4.99376	5.54408	4.81295	5.21035	5.37855	5.13395	-0.276149	0.846504	-0.686275	0.470817	2-oxoglutarate (2OG) and Fe(II)-dependent oxygenase superfamily protein [Source:TAIR_LOCUS;Acc:AT1G06640]		2032338	2034018	1	3
AT1G06645	3.94209	5.04869	3.72384	4.23821	4.0246	4.87401	4.84437	4.58099	4.34511	5.08714	4.43871	4.62365	0.342788	0.76695	0.385448	0.725792	2-oxoglutarate (2OG) and Fe(II)-dependent oxygenase superfamily protein [Source:TAIR_LOCUS;Acc:AT1G06645]		2034156	2035626	1	1
AT1G06650	6.37632	6.54476	6.48652	6.4692	6.65928	6.68064	7.00175	6.78056	6.78285	6.7778	6.77779	6.77948	0.311356	0.426926	0.310279	0.429398	2-oxoglutarate (2OG) and Fe(II)-dependent oxygenase superfamily protein [Source:TAIR_LOCUS;Acc:AT1G06650]		2035839	2037366	1	2
AT1G06670	5.2203	5.49569	4.461	5.059	4.80592	4.84272	5.37072	5.00645	5.08843	5.39922	5.43723	5.30829	-0.052543	0.960225	0.249297	0.727556	nuclear DEIH-boxhelicase [Source:TAIR_LOCUS;Acc:AT1G06670]	NIH	2040433	2047612	1	1	TAIR Gene Name
AT1G06680	12.017	10.3361	13.8349	12.0627	12.836	10.104	12.0268	11.6556	11.6208	9.86031	11.5494	11.0102	-0.407097	0.811163	-1.05254	0.335499	photosystem II subunit P-1 [Source:TAIR_LOCUS;Acc:AT1G06680]	PSBP-1	2047825	2049418	1	2	TAIR Gene Name
AT1G06690	6.50249	6.59659	7.04151	6.71353	6.3752	6.53934	6.23208	6.38221	5.52036	5.98765	5.28532	5.59778	-0.331322	0.556466	-1.11575	0.00917799	NAD(P)-linked oxidoreductase superfamily protein [Source:TAIR_LOCUS;Acc:AT1G06690]		2049602	2052154	-1	1
AT1G06700	5.90926	5.54793	6.25647	5.90455	6.36348	5.62512	6.09658	6.02839	6.02439	5.64139	6.05233	5.90603	0.123841	0.814594	0.00148207	0.998359	Protein kinase superfamily protein [Source:TAIR_LOCUS;Acc:AT1G06700]	PTI11	2052481	2055548	-1	2	UniProtKB Gene Name
AT1G06710	3.26627	3.47953	0.70759	2.48446	1.45928	2.46846	3.07248	2.33341	2.46518	3.10785	3.00991	2.86098	-0.151059	0.954288	0.376517	0.863756	Tetratricopeptide repeat (TPR)-like superfamily protein [Source:TAIR_LOCUS;Acc:AT1G06710]		2056575	2060242	-1	1
AT1G06720	5.05288	5.60676	4.11642	4.92535	5.23086	5.20781	4.99067	5.14311	5.07795	5.58696	5.11754	5.26081	0.217758	0.781694	0.335461	0.602266	P-loop containing nucleoside triphosphate hydrolases superfamily protein [Source:TAIR_LOCUS;Acc:AT1G06720]	F4H5.19	2060444	2067323	-1	1	UniProtKB Gene Name
AT1G06730	3.29917	3.65833	3.28258	3.41336	3.51677	3.38828	3.49825	3.46776	3.39067	3.51739	3.28382	3.39729	0.0544007	0.937179	-0.0160698	0.982645	pfkB-like carbohydrate kinase family protein [Source:TAIR_LOCUS;Acc:AT1G06730]	F4H5.18	2067529	2070446	1	1	UniProtKB Gene Name
AT1G06740	1.82372	1.73217	-0.292334	1.08785	-1.15495	1.14685	1.74903	0.580308	1.47946	1.4884	1.41571	1.46119	-0.507543	0.801525	0.373338	0.867289	transposable element gene [Source:TAIR_LOCUS;Acc:AT1G06740]		2070737	2073535	1	1
AT1G06760	5.38722	6.0465	6.51654	5.98342	7.06469	6.62075	6.38207	6.68917	6.55511	6.4626	6.75863	6.59211	0.705753	0.326072	0.608695	0.428132	winged-helix DNA-binding transcription factor family protein [Source:TAIR_LOCUS;Acc:AT1G06760]		2076504	2077698	-1	1
AT1G06770	3.33134	3.11063	2.74125	3.06107	3.08961	3.18805	3.15214	3.14327	3.15479	3.1697	3.14725	3.15725	0.0821965	0.905633	0.0961749	0.88542	DREB2A-interacting protein 1 [Source:TAIR_LOCUS;Acc:AT1G06770]	DRIP1	2078911	2081939	-1	2	TAIR Gene Name
AT1G06780	4.01322	5.28352	3.41194	4.23623	3.68201	4.8718	4.51234	4.35538	4.2497	4.93123	4.37039	4.51711	0.119154	0.901751	0.280881	0.693626	galacturonosyltransferase 6 [Source:TAIR_LOCUS;Acc:AT1G06780]	GAUT6	2083311	2087131	1	2	TAIR Gene Name
AT1G06790	3.0201	3.13437	3.98083	3.37843	4.23427	3.27827	2.41103	3.30785	2.76964	3.06291	2.80195	2.87817	-0.0705769	0.970117	-0.500266	0.672005	RNA polymerase Rpb7 N-terminal domain-containing protein [Source:TAIR_LOCUS;Acc:AT1G06790]	F4H5.12	2087232	2089786	1	2	UniProtKB Gene Name
AT1G06800	1.5231	3.70428	3.14068	2.78936	3.31479	3.72042	3.48659	3.50727	3.46589	3.4886	3.32057	3.42502	0.71791	0.360811	0.635665	0.444439	alpha/beta-Hydrolases superfamily protein [Source:TAIR_LOCUS;Acc:AT1G06800]	PLA-I{gamma}1	2089417	2091686	-1	2	TAIR Gene Name
AT1G06820	5.95644	5.67305	4.89815	5.50921	4.60681	5.28289	5.68969	5.19313	5.25567	5.42517	5.39495	5.3586	-0.316082	0.759787	-0.150616	0.908702	carotenoid isomerase [Source:TAIR_LOCUS;Acc:AT1G06820]	CRTISO	2092946	2096232	-1	1	TAIR Gene Name
AT1G06830	2.45763	3.06193	3.12338	2.88098	3.16131	3.01711	1.30648	2.49497	2.86787	2.5969	1.83811	2.43429	-0.386014	0.821576	-0.446685	0.78181	Glutaredoxin family protein [Source:TAIR_LOCUS;Acc:AT1G06830]	GRXS11	2097151	2097655	1	1	UniProtKB Gene Name
AT1G06840	4.17974	4.30809	3.42615	3.97133	3.59361	3.80439	4.29413	3.89737	4.54438	4.36532	4.90724	4.60565	-0.0739514	0.945451	0.634322	0.20606	Leucine-rich repeat protein kinase family protein [Source:TAIR_LOCUS;Acc:AT1G06840]		2097747	2103479	-1	1
AT1G06850	2.34239	1.69596	3.0151	2.35115	2.21773	1.87653	2.11013	2.06813	2.10601	1.72254	2.49578	2.10811	-0.283017	0.728804	-0.243034	0.780994	basic leucine-zipper 52 [Source:TAIR_LOCUS;Acc:AT1G06850]	AtbZIP52	2105048	2106749	1	2	TAIR Gene Name
AT1G06870	3.54394	3.77918	4.36735	3.89682	3.82492	4.03229	3.58826	3.81516	3.60538	3.87492	3.63835	3.70622	-0.0816693	0.943619	-0.190607	0.839662	Peptidase S24/S26A/S26B/S26C family protein [Source:TAIR_LOCUS;Acc:AT1G06870]	TPP2	2108593	2110986	1	1	UniProtKB Gene Name
AT1G06890	5.77124	5.77003	5.08121	5.54083	5.11132	5.5873	5.8235	5.50738	5.52485	5.75243	5.92988	5.73572	-0.0334543	0.978074	0.194889	0.831563	nodulin MtN21 /EamA-like transporter family protein [Source:TAIR_LOCUS;Acc:AT1G06890]		2111363	2114601	-1	3
AT1G06900	5.73502	4.73616	3.85269	4.77462	4.37627	4.6062	5.29432	4.75893	5.03255	4.87249	5.35315	5.08606	-0.0156939	0.992695	0.311441	0.794748	Insulinase (Peptidase family M16) family protein [Source:TAIR_LOCUS;Acc:AT1G06900]		2114927	2120745	-1	1
AT1G06910	2.66874	3.01518	2.77841	2.82078	2.95499	2.86845	2.51231	2.77859	2.3864	2.88614	2.45663	2.57639	-0.0421914	0.967149	-0.244388	0.719299	TRF-like 7 [Source:TAIR_LOCUS;Acc:AT1G06910]	TRFL7	2120991	2123748	1	1	TAIR Gene Name
AT1G06950	7.22415	7.06019	7.01695	7.10043	7.1852	6.80926	7.22699	7.07382	6.88685	7.04659	7.09282	7.00875	-0.0266144	0.969265	-0.0916776	0.871594	translocon at the inner envelope membrane of chloroplasts 110 [Source:TAIR_LOCUS;Acc:AT1G06950]	ATTIC110	2130142	2135665	-1	1	TAIR Gene Name
AT1G06960	4.31941	3.52124	5.27359	4.37141	4.86168	3.60201	3.65487	4.03952	3.84908	3.53156	3.603	3.66122	-0.331895	0.791944	-0.710197	0.418119	RNA-binding (RRM/RBD/RNP motifs) family protein [Source:TAIR_LOCUS;Acc:AT1G06960]		2135851	2137732	1	3
AT1G06980	1.28107	2.88518	2.11134	2.09253	1.9334	0.813733	0.996468	1.24787	0.736362	1.03139	1.14655	0.971435	-0.844662	0.457884	-1.12109	0.265191	unknown protein; FUNCTIONS IN: molecular_function unknown; INVOLVED IN: biological_process unknown; LOCATED IN: endomembrane system; EXPRESSED IN: sepal, male gametophyte, carpel; EXPRESSED DURING: 4 anthesis; BEST Arabidopsis thaliana protein match /.../nknown protein (TAIR:AT2G30230.1); Has 159 Blast hits to 159 proteins in 13 species: Archae - 0; Bacteria - 0; Metazoa - 0; Fungi - 0; Plants - …	F10K1.30	2143031	2143821	-1	1	UniProtKB Gene Name
AT1G07000	4.44969	4.57424	5.28953	4.77115	4.94671	4.75297	4.81557	4.83842	5.93117	5.0623	5.67341	5.55563	0.0672633	0.972462	0.784472	0.424462	exocyst subunit exo70 family protein B2 [Source:TAIR_LOCUS;Acc:AT1G07000]	ATEXO70B2	2150194	2152325	-1	1	TAIR Gene Name
AT1G07010	5.90713	5.90787	5.5491	5.78803	5.75121	5.58394	6.04198	5.79237	5.52164	5.81352	5.29455	5.54324	0.0043403	0.997192	-0.244797	0.762556	Calcineurin-like metallo-phosphoesterase superfamily protein [Source:TAIR_LOCUS;Acc:AT1G07010]	F10K1.27	2152852	2155269	1	3	UniProtKB Gene Name
AT1G07020	3.17349	2.75103	4.64236	3.52229	4.21311	2.99269	3.33556	3.51379	3.49011	3.02659	3.34575	3.28748	-0.00850489	0.996143	-0.234811	0.854541	unknown protein; Has 39 Blast hits to 39 proteins in 17 species: Archae - 0; Bacteria - 0; Metazoa - 6; Fungi - 3; Plants - 28; Viruses - 0; Other Eukaryotes - 2 (source: NCBI BLink). [Source:TAIR_LOCUS;Acc:AT1G07020]		2155213	2156008	-1	1
AT1G07030	3.32497	4.60957	4.3723	4.10228	4.30599	4.73116	4.13344	4.3902	4.1675	4.65256	4.35279	4.39095	0.287919	0.690537	0.288672	0.689543	Mitochondrial substrate carrier family protein [Source:TAIR_LOCUS;Acc:AT1G07030]	F10K1.26	2158420	2160809	-1	1	UniProtKB Gene Name
AT1G07040	5.25928	6.40619	6.04384	5.9031	5.86092	6.54003	6.41351	6.27149	6.27567	6.37963	6.46195	6.37242	0.36839	0.32811	0.469316	0.175698	unknown protein; INVOLVED IN: biological_process unknown; LOCATED IN: chloroplast; EXPRESSED IN: 24 plant structures; EXPRESSED DURING: 14 growth stages; BEST Arabidopsis thaliana protein match is: unknown protein (TAIR:AT1G27030.1); Has 540 Blast h /.../ 538 proteins in 187 species: Archae - 0; Bacteria - 333; Metazoa - 0; Fungi - 0; Plants - 67; Viruses - 0; Other Eukaryotes - 140 (source: NCBI…	F10K1.25	2160938	2163308	-1	1	UniProtKB Gene Name
AT1G07050	6.19237	7.20089	7.11661	6.83662	6.96064	7.54152	6.3435	6.94856	6.04766	7.12534	6.25618	6.47639	0.111932	0.956276	-0.360228	0.819996	CCT motif family protein [Source:TAIR_LOCUS;Acc:AT1G07050]		2164188	2165239	-1	1
AT1G07070	3.31856	2.73334	3.35365	3.13519	3.73318	3.1333	2.90298	3.25649	2.9403	2.81815	3.01889	2.92578	0.121303	0.913701	-0.209406	0.827168	Ribosomal protein L35Ae family protein [Source:TAIR_LOCUS;Acc:AT1G07070]	RPL35AA	2168564	2169851	1	1	UniProtKB Gene Name
AT1G07080	6.29831	6.98477	7.42683	6.9033	7.57167	6.93099	7.04228	7.18165	7.09535	6.90235	7.14919	7.04896	0.278343	0.696551	0.145659	0.873251	Thioredoxin superfamily protein [Source:TAIR_LOCUS;Acc:AT1G07080]	F10K1.21	2169982	2172194	1	1	UniProtKB Gene Name
AT1G07090	0.725423	4.12127	2.53979	2.46216	3.29497	4.41096	3.00868	3.57154	3.66325	4.87985	4.21929	4.25413	1.10937	0.226986	1.79197	0.0352821	Protein of unknown function (DUF640) [Source:TAIR_LOCUS;Acc:AT1G07090]	LSH6	2173952	2174894	-1	1	TAIR Gene Name
AT1G07110	7.45578	7.14424	6.79276	7.13093	6.83201	6.89983	7.47767	7.06983	7.17646	6.96904	7.22283	7.12278	-0.0610931	0.969815	-0.00815151	0.996364	fructose-2,6-bisphosphatase [Source:TAIR_LOCUS;Acc:AT1G07110]	F2KP	2178104	2184148	-1	1	TAIR Gene Name
AT1G07128	-0.15394	2.438	2.79302	1.69236	4.54019	2.79028	1.37141	2.90063	3.43017	2.92615	1.96457	2.77363	1.20827	0.575352	1.08127	0.6359	Potential natural antisense gene, locus overlaps with AT1G07130 [Source:TAIR_LOCUS;Acc:AT1G07128]		2187621	2188417	-1	1
AT1G07130	0.0453793	2.16158	1.29625	1.16774	1.16571	2.2449	0.996468	1.46903	1.81828	2.19285	1.17907	1.73007	0.301289	0.776216	0.56233	0.474529	Nucleic acid-binding, OB-fold-like protein [Source:TAIR_LOCUS;Acc:AT1G07130]	STN1	2187776	2188733	1	1	TAIR Gene Name
AT1G07135	4.57321	2.65094	4.77583	3.99999	5.2266	3.30162	3.42073	3.98298	5.88764	3.10785	4.04386	4.34645	-0.0170134	0.992243	0.346457	0.774702	glycine-rich protein [Source:TAIR_LOCUS;Acc:AT1G07135]	F10K1.16	2189928	2190659	-1	1	UniProtKB Gene Name
AT1G07140	6.65931	6.9352	7.84103	7.14518	7.83666	7.17772	6.92144	7.31194	6.94149	7.01528	6.93467	6.96381	0.166758	0.90445	-0.181369	0.89392	Pleckstrin homology (PH) domain superfamily protein [Source:TAIR_LOCUS;Acc:AT1G07140]	SIRANBP	2191723	2193793	-1	1	TAIR Gene Name
AT1G07150	-0.879116	-0.964607	2.93818	0.364819	2.44859	1.00642	1.56146	1.67216	1.81828	0.538356	1.42928	1.26197	1.30734	0.258773	0.897154	0.512787	mitogen-activated protein kinase kinase kinase 13 [Source:TAIR_LOCUS;Acc:AT1G07150]	MAPKKK13	2193941	2195798	-1	2	TAIR Gene Name
AT1G07170	3.69746	3.37818	4.45401	3.84322	4.60518	3.61004	3.90957	4.0416	4.17742	3.83362	4.0956	4.03555	0.19838	0.778272	0.192331	0.787433	PHF5-like protein [Source:TAIR_LOCUS;Acc:AT1G07170]		2200123	2201265	1	3
AT1G07180	5.75473	3.58652	5.86796	5.06974	5.5461	2.56564	5.12817	4.4133	4.87085	2.00787	4.32056	3.73309	-0.656436	0.36894	-1.33665	0.032101	alternative NAD(P)H dehydrogenase 1 [Source:TAIR_LOCUS;Acc:AT1G07180]	ATNDI1	2204320	2206934	1	1	TAIR Gene Name
AT1G07200	3.69993	4.06962	2.93158	3.56705	3.90861	4.13025	3.99225	4.01037	3.95306	4.13638	4.27456	4.12133	0.443325	0.498955	0.554287	0.347758	Double Clp-N motif-containing P-loop nucleoside triphosphate hydrolases superfamily protein [Source:TAIR_LOCUS;Acc:AT1G07200]	F10K1.9	2208719	2212546	-1	2	UniProtKB Gene Name
AT1G07210	4.73588	5.2646	4.9153	4.97192	5.31149	5.25942	4.88042	5.15044	4.85147	5.24278	4.75759	4.95061	0.178518	0.714047	-0.021312	0.977574	Ribosomal protein S18 [Source:TAIR_LOCUS;Acc:AT1G07210]	F10K1.8	2215223	2216982	1	1	UniProtKB Gene Name
AT1G07220	3.43565	3.81939	3.36844	3.54116	3.80252	3.70302	3.86975	3.79176	3.78763	4.11776	3.79008	3.89849	0.250604	0.596079	0.357329	0.368575	Arabidopsis thaliana protein of unknown function (DUF821) [Source:TAIR_LOCUS;Acc:AT1G07220]	F10K1.7	2216925	2219474	-1	1	UniProtKB Gene Name
AT1G07230	5.50544	5.8853	5.5884	5.65971	5.69658	5.61527	6.32443	5.87876	5.99106	5.94202	6.23049	6.05452	0.219046	0.712355	0.394811	0.376035	non-specific phospholipase C1 [Source:TAIR_LOCUS;Acc:AT1G07230]	NPC1	2220253	2222982	-1	1	TAIR Gene Name
AT1G07240	3.63439	5.1288	4.82925	4.53082	5.07394	4.65209	4.57693	4.76765	5.04516	5.39538	5.23154	5.22403	0.236839	0.773742	0.69321	0.175104	UDP-glucosyl transferase 71C5 [Source:TAIR_LOCUS;Acc:AT1G07240]	UGT71C5	2223691	2225452	1	1	TAIR Gene Name
AT1G07250	5.0711	5.81019	6.65856	5.84662	6.7135	5.53319	6.21059	6.15243	5.99199	5.44635	5.50796	5.64877	0.305809	0.788554	-0.19785	0.880849	UDP-glucosyl transferase 71C4 [Source:TAIR_LOCUS;Acc:AT1G07250]	UGT71C4	2225900	2227566	1	1	TAIR Gene Name
AT1G07260	-3.68661	-1.81969	0.548276	-1.65268	-0.923478	-0.761971	-1.69699	-1.12748	1.78339	2.13796	2.9688	2.29672	0.525196	0.800978	3.94939	0.00212626	UDP-glucosyl transferase 71C3 [Source:TAIR_LOCUS;Acc:AT1G07260]	UGT71C3	2227594	2229319	-1	1	TAIR Gene Name
AT1G07280	7.89483	8.63169	8.07026	8.19893	8.21748	8.19657	8.30654	8.2402	8.04795	8.49259	7.98404	8.17486	0.0412674	0.960713	-0.0240677	0.977942	Tetratricopeptide repeat (TPR)-like superfamily protein [Source:TAIR_LOCUS;Acc:AT1G07280]	F10K1.1	2238087	2241217	1	3	UniProtKB Gene Name
AT1G07290	0.800879	1.23504	0.85126	0.962393	-0.205007	0.404241	0.802851	0.334029	0.359459	0.749759	0.205714	0.438311	-0.628365	0.377627	-0.524083	0.499428	golgi nucleotide sugar transporter 2 [Source:TAIR_LOCUS;Acc:AT1G07290]	GONST2	2242256	2244428	-1	1	TAIR Gene Name
AT1G07300	2.41022	2.47576	2.70311	2.5297	2.70877	3.0725	2.47737	2.75288	2.45969	2.93331	2.9121	2.76837	0.223186	0.79387	0.238669	0.773721	josephin protein-related [Source:TAIR_LOCUS;Acc:AT1G07300]		2245758	2246492	-1	1
AT1G07310	4.09045	5.72375	5.52568	5.11329	5.13987	5.4914	5.59327	5.40818	5.54204	5.64354	5.57992	5.5885	0.29489	0.766516	0.475209	0.549504	Calcium-dependent lipid-binding (CaLB domain) family protein [Source:TAIR_LOCUS;Acc:AT1G07310]	AT1G07310/F22G5.35	2247509	2248961	-1	1	UniProtKB Gene Name
AT1G07320	7.89133	6.79959	9.35946	8.01679	8.75005	7.14338	7.61811	7.83718	7.34582	6.67876	7.04183	7.02214	-0.179612	0.925851	-0.994658	0.321858	ribosomal protein L4 [Source:TAIR_LOCUS;Acc:AT1G07320]	RPL4	2249133	2250529	1	4	TAIR Gene Name
AT1G07350	3.64467	5.28202	4.93226	4.61965	4.24264	5.17144	4.57281	4.6623	4.12199	5.29936	4.67366	4.69834	0.0426466	0.964722	0.0786854	0.930011	RNA-binding (RRM/RBD/RNP motifs) family protein [Source:TAIR_LOCUS;Acc:AT1G07350]	AT1G07350	2257425	2260101	-1	2	UniProtKB Gene Name
AT1G07360	4.63766	5.20626	4.3797	4.74121	4.70747	5.09107	5.28259	5.02704	5.25334	5.21762	5.24874	5.2399	0.285832	0.643594	0.498692	0.291047	CCCH-type zinc fingerfamily protein with RNA-binding domain [Source:TAIR_LOCUS;Acc:AT1G07360]		2260389	2262865	-1	1
AT1G07370	2.94308	-1.36763	3.12917	1.56821	1.44521	0.813733	1.30648	1.18847	1.24223	-0.285191	2.08937	1.01547	-0.379733	0.857352	-0.552738	0.76323	proliferating cellular nuclear antigen 1 [Source:TAIR_LOCUS;Acc:AT1G07370]	PCNA1	2263140	2264551	1	1	TAIR Gene Name
AT1G07380	3.1628	4.0573	2.93818	3.38609	3.86871	3.69298	4.27901	3.9469	3.9817	4.31857	4.1779	4.15939	0.560807	0.301051	0.773293	0.117921	Neutral/alkaline non-lysosomal ceramidase [Source:TAIR_LOCUS;Acc:AT1G07380]		2264829	2268306	-1	1
AT1G07390	2.36742	2.18785	-0.626563	1.30957	1.6432	2.53774	3.09185	2.42426	1.69224	2.33515	2.25074	2.09271	1.11469	0.516899	0.783141	0.7021	receptor like protein 1 [Source:TAIR_LOCUS;Acc:AT1G07390]	AtRLP1	2269893	2274820	1	3	TAIR Gene Name
AT1G07400	-3.32402	-3.75649	-1.39979	-2.82677	-0.161976	1.34115	-0.838081	0.113697	0.754645	0.0176535	0.465392	0.412564	2.94046	0.0405107	3.23933	0.0244142	HSP20-like chaperones superfamily protein [Source:TAIR_LOCUS;Acc:AT1G07400]	HSP17.8	2274943	2275758	1	1	UniProtKB Gene Name
AT1G07420	5.62771	6.06712	5.75324	5.81602	5.73849	5.97952	5.60072	5.77291	5.40324	5.78256	5.65919	5.615	-0.0431139	0.950462	-0.201024	0.64719	sterol 4-alpha-methyl-oxidase 2-1 [Source:TAIR_LOCUS;Acc:AT1G07420]	ATSMO2	2277807	2280297	1	2	TAIR Gene Name
AT1G07430	2.55891	6.00161	2.9899	3.85014	4.11393	5.41766	4.96991	4.83383	4.43728	5.01465	3.41874	4.29023	0.983691	0.295174	0.440083	0.748833	highly ABA-induced PP2C gene 2 [Source:TAIR_LOCUS;Acc:AT1G07430]	HAI2	2280835	2282828	-1	1	TAIR Gene Name
AT1G07440	6.57079	6.6193	6.60307	6.59772	6.74969	6.73239	6.68466	6.72225	6.38172	6.52771	5.94166	6.2837	0.124532	0.94231	-0.314019	0.81801	NAD(P)-binding Rossmann-fold superfamily protein [Source:TAIR_LOCUS;Acc:AT1G07440]		2286149	2287730	-1	2
AT1G07470	4.04655	4.1297	4.63618	4.27081	5.05369	4.45308	4.09751	4.53476	4.44686	4.15628	4.25384	4.28566	0.263951	0.765651	0.0148542	0.990943	Transcription factor IIA, alpha/beta subunit [Source:TAIR_LOCUS;Acc:AT1G07470]		2291457	2294588	1	1
AT1G07480	3.9504	3.94135	4.59431	4.16202	4.93244	4.13396	3.85623	4.30754	4.23078	3.94357	3.89118	4.02184	0.145524	0.896873	-0.140175	0.901675	Transcription factor IIA, alpha/beta subunit [Source:TAIR_LOCUS;Acc:AT1G07480]	TFIIA-L	2296023	2299470	-1	2	UniProtKB Gene Name
AT1G07510	4.38219	5.70928	5.05974	5.0504	5.19099	5.61329	5.00094	5.26841	5.00884	5.60367	4.93468	5.18239	0.218004	0.693617	0.131992	0.845546	FTSH protease 10 [Source:TAIR_LOCUS;Acc:AT1G07510]	ftsh10	2305378	2309544	1	1	TAIR Gene Name
AT1G07520	3.29265	3.2256	3.2981	3.27212	3.4501	3.14442	3.48072	3.35842	3.86763	3.27473	3.68416	3.60884	0.0862974	0.91144	0.336722	0.459851	GRAS family transcription factor [Source:TAIR_LOCUS;Acc:AT1G07520]	SCL31	2309564	2311805	-1	1	UniProtKB Gene Name
AT1G07530	5.18991	5.92865	4.61539	5.24465	5.2116	5.56221	5.57759	5.45047	5.70511	5.84942	5.45545	5.66999	0.205814	0.816633	0.425341	0.501862	SCARECROW-like 14 [Source:TAIR_LOCUS;Acc:AT1G07530]	SCL14	2313582	2316469	-1	1	TAIR Gene Name
AT1G07570	2.41623	1.90859	1.91333	2.07938	1.86076	2.27229	1.18168	1.77158	1.6828	1.33359	0.773181	1.26319	-0.307807	0.737779	-0.816193	0.171907	Protein kinase superfamily protein [Source:TAIR_LOCUS;Acc:AT1G07570]	APK1A	2331170	2333738	-1	3	TAIR Gene Name
AT1G07590	8.59324	6.50486	8.67667	7.92492	9.04222	8.55385	8.28019	8.62542	8.07434	7.62692	8.91215	8.20447	0.700496	0.440813	0.279547	0.839234	Tetratricopeptide repeat (TPR)-like superfamily protein [Source:TAIR_LOCUS;Acc:AT1G07590]		2336523	2339391	-1	1
AT1G07610	3.75315	-0.279334	3.85269	2.44217	4.34545	4.22195	4.8512	4.47287	3.3293	2.21069	4.17389	3.23796	2.0307	0.0339797	0.795793	0.527275	metallothionein 1C [Source:TAIR_LOCUS;Acc:AT1G07610]	MT1C	2341542	2342123	1	1	TAIR Gene Name
AT1G07615	2.35496	3.78132	2.14566	2.76065	2.85064	3.2983	2.7889	2.97928	3.00173	3.35672	2.82261	3.06035	0.218635	0.780804	0.299706	0.660207	GTP-binding protein Obg/CgtA [Source:TAIR_LOCUS;Acc:AT1G07615]		2342198	2344271	-1	1
AT1G07620	3.14119	3.3553	1.39391	2.63013	3.20015	3.58582	3.11476	3.30024	4.04636	4.40294	4.18786	4.21238	0.670113	0.327921	1.58226	0.00983287	GTP-binding protein Obg/CgtA [Source:TAIR_LOCUS;Acc:AT1G07620]	ATOBGM	2344390	2346842	-1	1	TAIR Gene Name
AT1G07630	4.54056	4.59384	3.93158	4.35532	4.51614	4.59818	5.11405	4.74279	5.04695	5.25555	5.20828	5.17026	0.387465	0.652931	0.814933	0.18699	pol-like 5 [Source:TAIR_LOCUS;Acc:AT1G07630]	PLL5	2349097	2351692	1	1	TAIR Gene Name
AT1G07640	4.61563	5.70256	4.9136	5.07726	5.18113	6.04402	4.42502	5.21672	5.16051	5.96889	4.53859	5.22266	0.139463	0.888521	0.1454	0.882656	Dof-type zinc finger DNA-binding family protein [Source:TAIR_LOCUS;Acc:AT1G07640]	OBP2	2354354	2356227	-1	3	TAIR Gene Name
AT1G07650	6.53497	7.05407	6.68478	6.75794	6.33478	6.19075	6.71238	6.41264	6.48206	6.61565	6.75996	6.61922	-0.345299	0.337549	-0.138717	0.801942	Leucine-rich repeat transmembrane protein kinase [Source:TAIR_LOCUS;Acc:AT1G07650]	AT1G07655	2359549	2366561	-1	2	UniProtKB Gene Name
AT1G07660	3.31535	3.76407	4.4065	3.82864	4.51093	3.83892	3.45702	3.93563	3.48476	3.5456	3.53898	3.52312	0.106985	0.9395	-0.305525	0.771371	Histone superfamily protein [Source:TAIR_LOCUS;Acc:AT1G07660]	AT5G59970	2368837	2369734	1	2	UniProtKB Gene Name
AT1G07670	4.83008	5.1652	4.34486	4.78005	4.60029	4.93355	5.42052	4.98478	5.09969	5.2661	5.61716	5.32765	0.204737	0.850204	0.547604	0.433289	endomembrane-type CA-ATPase 4 [Source:TAIR_LOCUS;Acc:AT1G07670]	ATECA4	2370052	2374545	-1	1	TAIR Gene Name
AT1G07700	6.71372	5.55417	6.34197	6.20329	6.22535	5.59133	6.11983	5.97884	5.9484	5.47995	5.91082	5.77972	-0.224448	0.5817	-0.423562	0.172844	Thioredoxin superfamily protein [Source:TAIR_LOCUS;Acc:AT1G07700]		2379647	2381362	1	3
AT1G07705	5.10592	4.83305	3.8025	4.58049	3.94745	4.47076	4.86588	4.42803	4.60791	4.78696	4.76692	4.72059	-0.152459	0.898586	0.140103	0.908603	NOT2 / NOT3 / NOT5 family [Source:TAIR_LOCUS;Acc:AT1G07705]		2381615	2386092	1	2
AT1G07720	4.60514	5.98187	5.64232	5.40978	4.37437	5.26952	6.33987	5.32792	4.62727	5.21108	5.06885	4.96907	-0.0818579	0.937241	-0.440709	0.436257	3-ketoacyl-CoA synthase 3 [Source:TAIR_LOCUS;Acc:AT1G07720]	KCS3	2390655	2392453	-1	1	TAIR Gene Name
AT1G07728	3.27622	3.75319	4.34738	3.79226	4.03426	3.65211	3.89862	3.86166	4.02818	3.97842	4.12287	4.04316	0.0694005	0.93886	0.250893	0.678717	other RNA [Source:TAIR_LOCUS;Acc:AT1G07728]		2395451	2397345	1	2
AT1G07740	1.3828	1.99301	0.645929	1.34058	0.659724	1.16163	1.95786	1.25974	1.42375	1.79543	1.68821	1.6358	-0.0808407	0.974936	0.295219	0.891299	Tetratricopeptide repeat (TPR)-like superfamily protein [Source:TAIR_LOCUS;Acc:AT1G07740]		2397442	2400508	-1	1
AT1G07745	3.08946	2.78147	2.95128	2.94073	2.78426	2.59302	2.97569	2.78432	3.1137	2.9081	2.90727	2.97636	-0.156413	0.749014	0.0356218	0.959409	homolog of RAD51 D [Source:TAIR_LOCUS;Acc:AT1G07745]	ATRAD51D	2400589	2402873	-1	2	TAIR Gene Name
AT1G07750	4.24029	5.03445	4.2486	4.50778	5.12052	5.37309	5.08539	5.193	4.9391	5.16519	5.30829	5.13753	0.685218	0.0495325	0.629746	0.0725411	RmlC-like cupins superfamily protein [Source:TAIR_LOCUS;Acc:AT1G07750]	F24B9.13	2404037	2405943	-1	1	UniProtKB Gene Name
AT1G07770	6.90944	5.51886	7.62701	6.6851	7.72453	6.25379	6.58831	6.85554	6.51762	5.99442	7.01648	6.5095	0.170438	0.895772	-0.1756	0.89186	ribosomal protein S15A [Source:TAIR_LOCUS;Acc:AT1G07770]	RPS15A	2408203	2409580	-1	2	TAIR Gene Name
AT1G07780	3.05519	2.44346	2.13431	2.54432	2.52487	2.70761	2.41719	2.54989	2.46518	2.69713	2.32511	2.49581	0.00557216	0.996925	-0.0485115	0.970707	phosphoribosylanthranilate isomerase 1 [Source:TAIR_LOCUS;Acc:AT1G07780]	PAI1	2410056	2412677	-1	5	TAIR Gene Name
AT1G07790	2.87923	3.68837	3.79885	3.45548	3.63847	3.69801	3.1373	3.49126	3.23677	3.47154	3.38097	3.36309	0.0357806	0.973542	-0.0923895	0.924279	Histone superfamily protein [Source:TAIR_LOCUS;Acc:AT1G07790]	HTB1	2412980	2413708	1	1	TAIR Gene Name
AT1G07810	4.42605	5.17983	4.27525	4.62704	4.39521	4.79796	5.48336	4.89218	5.13464	5.2689	5.76452	5.38935	0.265139	0.762073	0.762311	0.165988	ER-type Ca2+-ATPase 1 [Source:TAIR_LOCUS;Acc:AT1G07810]	ECA1	2416265	2420757	1	1	TAIR Gene Name
AT1G07820	4.49157	4.61317	5.8237	4.97615	5.75046	4.67131	4.51807	4.97995	4.65111	4.54076	4.93113	4.70766	0.00380216	0.998432	-0.268483	0.859701	Histone superfamily protein [Source:TAIR_LOCUS;Acc:AT1G07820]	AT5G59970	2421216	2421947	-1	2	UniProtKB Gene Name
AT1G07830	2.96785	3.57914	3.70447	3.41715	4.29394	3.91856	2.95468	3.7224	3.2807	3.7269	3.44561	3.4844	0.305246	0.782425	0.06725	0.964903	ribosomal protein L29 family protein [Source:TAIR_LOCUS;Acc:AT1G07830]	F24B9.7	2422241	2423655	1	1	UniProtKB Gene Name
AT1G07840	3.94832	4.67426	4.05019	4.22426	4.32783	4.50119	3.8787	4.2359	4.08027	4.48019	4.06565	4.2087	0.0116458	0.98799	-0.0155552	0.983766	Sas10/Utp3/C1D family [Source:TAIR_LOCUS;Acc:AT1G07840]	F24B9.6	2424054	2426676	1	3	UniProtKB Gene Name
AT1G07870	2.54801	3.72449	1.92652	2.73301	2.63546	3.8947	3.27923	3.26979	3.20128	4.04404	3.16757	3.47096	0.536787	0.269452	0.737953	0.0994573	Protein kinase superfamily protein [Source:TAIR_LOCUS;Acc:AT1G07870]		2428773	2432057	-1	2
AT1G07880	1.68123	0.101277	1.4676	1.08337	0.841405	1.90309	1.04505	1.26318	0.00790782	1.22024	0.141039	0.456395	0.179816	0.918562	-0.626972	0.573324	Protein kinase superfamily protein [Source:TAIR_LOCUS;Acc:AT1G07880]	ATMPK13	2434030	2435763	-1	2	TAIR Gene Name
AT1G07890	7.13194	9.30023	9.10168	8.51128	9.0379	9.99751	8.67236	9.23592	8.27719	9.62655	8.97786	8.96053	0.724639	0.44684	0.44925	0.709346	ascorbate peroxidase 1 [Source:TAIR_LOCUS;Acc:AT1G07890]	APX1	2437330	2439665	1	8	TAIR Gene Name
AT1G07900	0.425103	2.5735	-0.962718	0.678629	2.68474	4.35174	3.62859	3.55502	1.72021	3.65539	1.73266	2.36942	2.8764	0.0038931	1.69079	0.0748445	LOB domain-containing protein 1 [Source:TAIR_LOCUS;Acc:AT1G07900]	LBD1	2442622	2443632	1	1	TAIR Gene Name
AT1G07910	4.87333	5.06016	4.26198	4.73183	4.02944	4.33896	4.74278	4.37039	4.59075	4.74724	4.66371	4.66723	-0.361434	0.488217	-0.0645921	0.94518	RNAligase [Source:TAIR_LOCUS;Acc:AT1G07910]	ATRNL	2445470	2454645	1	2	TAIR Gene Name
AT1G07920	6.47647	6.86501	7.44513	6.92887	7.93445	7.38971	7.32693	7.55037	7.16859	7.30057	7.55365	7.34094	0.621498	0.300486	0.412067	0.57221	GTP binding Elongation factor Tu family protein [Source:TAIR_LOCUS;Acc:AT1G07920]	A1	2454846	2457321	1	1	UniProtKB Gene Name
AT1G07930	7.07584	7.51936	8.23752	7.61091	8.93295	8.00774	8.11847	8.35305	7.93945	7.87825	8.30845	8.04205	0.742148	0.340814	0.431143	0.671165	GTP binding Elongation factor Tu family protein [Source:TAIR_LOCUS;Acc:AT1G07930]	A4	2458244	2460790	1	2	UniProtKB Gene Name
AT1G07940	6.78283	6.34506	7.07506	6.73432	7.43692	6.74834	6.73283	6.9727	6.52812	6.69333	7.21146	6.81097	0.238383	0.817903	0.0766536	0.954216	GTP binding Elongation factor Tu family protein [Source:TAIR_LOCUS;Acc:AT1G07940]	A2	2462953	2465504	-1	2	UniProtKB Gene Name
AT1G07950	3.49081	3.78987	4.28577	3.85548	4.11848	3.81599	3.36769	3.76739	3.73468	3.79697	3.62959	3.72042	-0.088095	0.923873	-0.135068	0.871452	Surfeit locus protein 5 subunit 22 of Mediator complex [Source:TAIR_LOCUS;Acc:AT1G07950]	MED22B	2465770	2467022	-1	1	TAIR Gene Name
AT1G07960	4.39594	4.49958	4.64441	4.51331	4.84241	4.46783	4.45222	4.58749	4.34071	4.62761	4.44371	4.47067	0.0741758	0.897575	-0.0426361	0.947237	PDI-like 5-1 [Source:TAIR_LOCUS;Acc:AT1G07960]	ATPDIL5-1	2467161	2469154	1	3	TAIR Gene Name
AT1G07970	3.49933	3.5816	3.44023	3.50706	3.60334	3.53892	3.43293	3.52506	3.455	3.5572	3.41874	3.47698	0.0180077	0.978833	-0.0300758	0.963099	CONTAINS InterPro DOMAIN/s: Cytochrome B561-related, N-terminal (InterPro:IPR019176); Has 215 Blast hits to 213 proteins in 79 species: Archae - 0; Bacteria - 6; Metazoa - 131; Fungi - 22; Plants - 42; Viruses - 0; Other Eukaryotes - 14 (source: NCB /.../k). [Source:TAIR_LOCUS;Acc:AT1G07970]		2469286	2472628	-1	1
AT1G07980	2.96785	3.949	3.95477	3.62387	4.17643	4.02631	3.3835	3.86208	3.45226	3.9006	3.34575	3.5662	0.238208	0.767968	-0.0576693	0.959305	nuclear factor Y, subunit C10 [Source:TAIR_LOCUS;Acc:AT1G07980]	NF-YC10	2473165	2474927	-1	1	TAIR Gene Name
AT1G07990	6.11038	6.60828	6.36115	6.35994	6.71234	6.11973	6.33541	6.38916	6.37679	6.50869	6.34844	6.41131	0.0292213	0.976264	0.0513668	0.956593	SIT4 phosphatase-associated family protein [Source:TAIR_LOCUS;Acc:AT1G07990]	AT1G07990	2477157	2483138	1	1	UniProtKB Gene Name
AT1G08000	2.45178	3.2256	3.58678	3.08805	3.01904	2.87292	2.69573	2.86256	2.57574	2.86008	2.49578	2.64387	-0.22549	0.766516	-0.444189	0.418589	GATA transcription factor 10 [Source:TAIR_LOCUS;Acc:AT1G08000]	GATA10	2483240	2485109	-1	2	TAIR Gene Name
AT1G08010	3.06288	4.06611	4.16277	3.76392	3.8606	3.67779	3.30601	3.6148	3.39638	3.52449	3.37399	3.43162	-0.149119	0.871366	-0.332296	0.618435	GATA transcription factor 11 [Source:TAIR_LOCUS;Acc:AT1G08010]	GATA11	2485906	2488027	-1	2	TAIR Gene Name
AT1G08030	4.50574	4.74604	4.0594	4.43706	4.1938	4.4516	4.50947	4.38496	4.43178	4.659	4.39982	4.49687	-0.0521036	0.949822	0.0598076	0.94129	tyrosylprotein sulfotransferase [Source:TAIR_LOCUS;Acc:AT1G08030]	TPST	2489501	2493250	-1	1	TAIR Gene Name
AT1G08040	5.26346	5.15701	5.43167	5.28404	5.36385	5.14056	5.22769	5.24403	4.7504	4.84172	4.87681	4.82297	-0.0400092	0.967992	-0.461069	0.337946	Protein of unknown function (DUF707) [Source:TAIR_LOCUS;Acc:AT1G08040]		2495342	2498764	-1	2
AT1G08050	1.1136	1.76749	2.95779	1.94629	3.49952	3.34078	2.93337	3.25789	3.08209	3.32448	3.00088	3.13582	1.31159	0.177878	1.18952	0.235427	Zinc finger (C3HC4-type RING finger) family protein [Source:TAIR_LOCUS;Acc:AT1G08050]	AT1G08050	2498836	2501427	-1	1	UniProtKB Gene Name
AT1G08060	4.86895	4.89452	3.37334	4.37894	3.69117	3.80672	5.16333	4.22041	4.53544	4.61331	4.88294	4.67723	-0.158531	0.938874	0.298293	0.867299	ATP-dependent helicase family protein [Source:TAIR_LOCUS;Acc:AT1G08060]	MOM	2501742	2511084	-1	2	TAIR Gene Name
AT1G08070	1.30718	1.64937	0.737474	1.23134	1.04075	1.16163	1.3197	1.17403	1.30534	1.4884	1.0619	1.28521	-0.0573155	0.964294	0.0538697	0.966653	Tetratricopeptide repeat (TPR)-like superfamily protein [Source:TAIR_LOCUS;Acc:AT1G08070]	OTP82	2514192	2516605	-1	1	TAIR Gene Name
AT1G08090	-0.0508409	-0.353883	-0.417027	-0.273917	2.01223	2.42035	0.705438	1.71267	2.02637	0.798073	0.639247	1.15456	1.98659	0.266236	1.42848	0.490259	nitrate transporter 2:1 [Source:TAIR_LOCUS;Acc:AT1G08090]	ATNRT2:1	2524076	2526164	1	1	TAIR Gene Name
AT1G08110	6.7286	7.06737	7.48813	7.0947	7.21671	7.05072	6.95374	7.07372	7.06108	6.9913	6.90674	6.98637	-0.0209775	0.978896	-0.108327	0.862226	lactoylglutathione lyase family protein / glyoxalase I family protein [Source:TAIR_LOCUS;Acc:AT1G08110]	AT1G08110	2535328	2537931	1	4	UniProtKB Gene Name
AT1G08115	-2.58702	1.33276	1.53775	0.0944985	-0.205007	0.453281	-1.40779	-0.386505	0.0679602	-0.156279	0.236992	0.0495579	-0.481004	0.889214	-0.0449406	0.991487	snRNA [Source:TAIR_LOCUS;Acc:AT1G08115]		2538076	2538237	-1	1
AT1G08125	3.97911	4.78914	5.50074	4.75633	5.57913	4.53378	4.08597	4.73296	4.53287	4.67814	4.08923	4.43342	-0.0233681	0.991487	-0.322913	0.84646	S-adenosyl-L-methionine-dependent methyltransferases superfamily protein [Source:TAIR_LOCUS;Acc:AT1G08125]	AT1G08130/T6D22_10	2539614	2542334	-1	3	UniProtKB Gene Name
AT1G08130	5.28743	4.86562	4.82563	4.99289	4.63423	4.66237	4.69803	4.66488	4.60913	4.5454	4.40154	4.51869	-0.328015	0.271485	-0.474207	0.0819699	DNA ligase 1 [Source:TAIR_LOCUS;Acc:AT1G08130]	ATLIG1	2542702	2547946	-1	1	TAIR Gene Name
AT1G08160	1.48929	0.25939	1.39391	1.04753	1.18272	0.0366445	-0.0442445	0.391707	1.18965	-0.319316	0.835745	0.568694	-0.655821	0.34873	-0.478834	0.556844	Late embryogenesis abundant (LEA) hydroxyproline-rich glycoprotein family [Source:TAIR_LOCUS;Acc:AT1G08160]		2559487	2560403	-1	1
AT1G08165	1.4311	0.650139	1.4676	1.18295	0.92443	0.500699	-1.69699	-0.0906201	-0.0230941	-0.909081	-1.08908	-0.673753	-1.27357	0.148409	-1.8567	0.0288009	unknown protein; FUNCTIONS IN: molecular_function unknown; INVOLVED IN: biological_process unknown; LOCATED IN: cellular_component unknown; Has 30201 Blast hits to 17322 proteins in 780 species: Archae - 12; Bacteria - 1396; Metazoa - 17338; Fungi - /.../ Plants - 5037; Viruses - 0; Other Eukaryotes - 2996 (source: NCBI BLink). [Source:TAIR_LOCUS;Acc:AT1G08165]		2561627	2562148	-1	1
AT1G08180	0.192728	2.09373	1.62097	1.30248	2.19251	1.40462	0.802851	1.46666	1.03419	1.68892	1.42928	1.38413	0.164183	0.913701	0.0816508	0.961002	unknown protein; Has 53 Blast hits to 53 proteins in 9 species: Archae - 0; Bacteria - 0; Metazoa - 1; Fungi - 0; Plants - 52; Viruses - 0; Other Eukaryotes - 0 (source: NCBI BLink). [Source:TAIR_LOCUS;Acc:AT1G08180]	SMR2	2564572	2565121	-1	1	UniProtKB Gene Name
AT1G08190	6.07614	6.78619	6.21564	6.35932	5.93107	6.34383	6.56741	6.28077	6.15946	6.53698	6.53137	6.40927	-0.0785554	0.890041	0.0499488	0.936404	vacuolar protein sorting 41 [Source:TAIR_LOCUS;Acc:AT1G08190]	ATVPS41	2567475	2573393	1	1	TAIR Gene Name
AT1G08200	7.42517	7.54182	8.43154	7.79951	7.09947	7.60531	7.28056	7.32845	6.67352	6.80632	6.70267	6.72751	-0.471062	0.38128	-1.072	0.019286	UDP-D-apiose/UDP-D-xylose synthase 2 [Source:TAIR_LOCUS;Acc:AT1G08200]	AXS2	2573848	2576714	-1	1	TAIR Gene Name
AT1G08210	3.62404	3.64896	4.28315	3.85205	3.7769	3.502	3.56351	3.61414	3.65614	3.57784	3.91298	3.71565	-0.237916	0.687527	-0.136399	0.853264	Eukaryotic aspartyl protease family protein [Source:TAIR_LOCUS;Acc:AT1G08210]		2577020	2580669	-1	1
AT1G08220	2.3297	2.65094	1.745	2.24188	1.92324	2.85496	1.87971	2.2193	1.7922	2.81039	2.19629	2.26629	-0.0225796	0.980995	0.0244108	0.979666	FUNCTIONS IN: molecular_function unknown; INVOLVED IN: mitochondrial proton-transporting ATP synthase complex assembly; LOCATED IN: mitochondrial inner membrane; EXPRESSED IN: 18 plant structures; EXPRESSED DURING: 7 growth stages; CONTAINS InterPro /.../N/s: ATPase assembly factor ATP10, mitochondria (InterPro:IPR007849); Has 168 Blast hits to 168 proteins in 86 species: Archae - 6; Bacteria - 0…		2581022	2583323	-1	2
AT1G08230	2.75665	4.77742	3.08222	3.53876	2.68474	4.36126	3.75543	3.60047	3.68901	4.92146	4.0871	4.23252	0.0617107	0.973102	0.693761	0.462902	Transmembrane amino acid transporter family protein [Source:TAIR_LOCUS;Acc:AT1G08230]	GAT1	2583654	2586744	-1	1	UniProtKB Gene Name
AT1G08250	0.725423	3.78774	2.53979	2.35098	2.48376	3.6547	3.12983	3.08943	2.76521	3.79306	3.44561	3.33462	0.738443	0.574852	0.98364	0.389637	arogenate dehydratase 6 [Source:TAIR_LOCUS;Acc:AT1G08250]	ADT6	2588857	2590301	-1	1	TAIR Gene Name
AT1G08260	4.41408	2.76415	3.2981	3.49211	2.61018	2.39567	3.32905	2.7783	3.16488	2.95808	3.74487	3.28928	-0.713813	0.355961	-0.202837	0.878205	DNA polymerase epsilon catalytic subunit [Source:TAIR_LOCUS;Acc:AT1G08260]	EMB142	2590944	2606892	1	1	TAIR Gene Name
AT1G08270	0.376602	1.32091	0.70759	0.8017	0.479841	1.08613	-0.344791	0.407059	0.429606	0.813823	0.0382274	0.427219	-0.394641	0.531972	-0.374481	0.563595	CONTAINS InterPro DOMAIN/s: MIT (InterPro:IPR007330); BEST Arabidopsis thaliana protein match is: AAA-type ATPase family protein (TAIR:AT2G27600.1); Has 35333 Blast hits to 34131 proteins in 2444 species: Archae - 798; Bacteria - 22429; Metazoa - 97 /.../gi - 991; Plants - 531; Viruses - 0; Other Eukaryotes - 9610 (source: NCBI BLink). [Source:TAIR_LOCUS;Acc:AT1G08270]		2606269	2607507	-1	2
AT1G08280	1.63042	2.01519	1.75979	1.8018	0.77589	1.48902	1.48138	1.24876	0.859676	1.58304	1.75438	1.39903	-0.553041	0.218279	-0.402774	0.43063	Glycosyltransferase family 29 (sialyltransferase) family protein [Source:TAIR_LOCUS;Acc:AT1G08280]	AT1G08280	2608408	2609853	1	1	UniProtKB Gene Name
AT1G08290	-1.44946	-1.15201	-1.53299	-1.37816	-1.24103	0.696585	-0.838081	-0.460841	-0.741139	-0.125784	-0.417731	-0.428218	0.917315	0.408097	0.949937	0.384072	WIP domain protein 3 [Source:TAIR_LOCUS;Acc:AT1G08290]	WIP3	2609996	2613242	-1	1	TAIR Gene Name
AT1G08300	1.66112	2.57847	1.77444	2.00467	1.81757	2.13728	1.46957	1.80814	1.80964	2.3673	1.402	1.85965	-0.196536	0.844973	-0.145028	0.894736	no vein-like [Source:TAIR_LOCUS;Acc:AT1G08300]	NVL	2614774	2618823	1	1	TAIR Gene Name
AT1G08315	1.12833	2.86503	2.93818	2.31051	3.58381	3.25795	3.54676	3.46284	3.98547	3.38043	3.61488	3.66026	1.15233	0.171639	1.34975	0.0985112	ARM repeat superfamily protein [Source:TAIR_LOCUS;Acc:AT1G08315]		2620335	2621545	-1	1
AT1G08350	3.37829	2.95165	2.09972	2.80989	2.29089	2.73734	2.97569	2.66797	2.81746	2.91535	3.20737	2.98006	-0.141912	0.894464	0.170175	0.867171	Endomembrane protein 70 protein family [Source:TAIR_LOCUS;Acc:AT1G08350]		2632810	2635852	-1	2
AT1G08360	7.587	6.48579	7.82265	7.29848	8.08575	7.09533	7.10374	7.42827	6.94882	6.69798	7.32824	6.99168	0.129793	0.918562	-0.3068	0.750616	Ribosomal protein L1p/L10e family [Source:TAIR_LOCUS;Acc:AT1G08360]	RPL10AA	2636011	2637915	1	1	UniProtKB Gene Name
AT1G08370	4.0658	5.00735	4.4233	4.49882	4.7256	4.99378	4.75497	4.82478	4.95829	5.07277	4.86817	4.96641	0.325965	0.557394	0.467592	0.317617	decapping 1 [Source:TAIR_LOCUS;Acc:AT1G08370]	DCP1	2638181	2640554	1	1	TAIR Gene Name
AT1G08380	11.0815	9.80635	12.9376	11.2752	12.1156	9.33459	11.3768	10.9423	11.1427	9.08973	10.8662	10.3662	-0.332834	0.835448	-0.908959	0.369533	photosystem I subunit O [Source:TAIR_LOCUS;Acc:AT1G08380]	PSAO	2640813	2641828	-1	1	TAIR Gene Name
AT1G08390	3.32177	0.828598	3.95477	2.70171	3.23383	1.02272	2.84935	2.36863	2.56046	0.575827	2.13971	1.75866	-0.333076	0.671242	-0.943047	0.073132	unknown protein; Has 62 Blast hits to 62 proteins in 27 species: Archae - 0; Bacteria - 0; Metazoa - 34; Fungi - 0; Plants - 28; Viruses - 0; Other Eukaryotes - 0 (source: NCBI BLink). [Source:TAIR_LOCUS;Acc:AT1G08390]	AT1G08390	2642214	2643285	1	1	UniProtKB Gene Name
AT1G08400	2.04935	2.89316	2.51365	2.48539	2.14072	2.60382	2.50076	2.4151	2.46518	2.87503	2.6883	2.67617	-0.0702878	0.904744	0.190783	0.640596	RINT-1 / TIP-1 family [Source:TAIR_LOCUS;Acc:AT1G08400]	AT1G08400/T27G7_16	2643330	2646035	-1	1	UniProtKB Gene Name
AT1G08410	3.92953	4.24435	3.74675	3.97354	4.71354	4.3801	3.84715	4.31359	4.00047	4.35609	4.2405	4.19902	0.340053	0.595709	0.225481	0.771241	P-loop containing nucleoside triphosphate hydrolases superfamily protein [Source:TAIR_LOCUS;Acc:AT1G08410]	AT1G08410	2646189	2649379	1	1	UniProtKB Gene Name
AT1G08420	5.73442	6.38435	5.43287	5.85055	5.4569	5.78775	6.18921	5.81129	5.91616	6.26842	6.2348	6.13979	-0.0392615	0.971213	0.289244	0.669773	BRI1 suppressor 1 (BSU1)-like 2 [Source:TAIR_LOCUS;Acc:AT1G08420]	BSL2	2649537	2657120	1	2	TAIR Gene Name
AT1G08450	7.61324	6.84514	8.55248	7.67029	9.26266	7.62801	7.83095	8.24054	8.23531	7.78233	8.0184	8.01201	0.570255	0.644339	0.341724	0.824474	calreticulin 3 [Source:TAIR_LOCUS;Acc:AT1G08450]	CRT3	2667798	2671892	-1	3	TAIR Gene Name
AT1G08460	4.18854	5.29476	5.45663	4.97998	5.87331	5.05157	5.39194	5.43894	5.71915	5.45866	5.71385	5.63055	0.458962	0.467968	0.650574	0.232906	histone deacetylase 8 [Source:TAIR_LOCUS;Acc:AT1G08460]	HDA08	2672451	2674628	1	1	TAIR Gene Name
AT1G08465	3.48796	3.71555	3.45418	3.55256	3.613	3.59123	3.46001	3.55475	3.53217	3.34606	3.33141	3.40321	0.00218744	0.998284	-0.149348	0.847711	Plant-specific transcription factor YABBY family protein [Source:TAIR_LOCUS;Acc:AT1G08465]	YAB2	2675813	2679781	1	1	TAIR Gene Name
AT1G08470	4.04461	4.41807	4.07159	4.17809	3.71533	3.90776	3.99019	3.87109	3.4686	3.70832	3.57895	3.58529	-0.306997	0.535661	-0.5928	0.123055	strictosidine synthase-like 3 [Source:TAIR_LOCUS;Acc:AT1G08470]	SSL3	2682127	2684100	-1	1	TAIR Gene Name
AT1G08480	5.16245	5.26688	6.76939	5.73291	6.72043	5.9887	5.28006	5.99639	5.51907	5.58752	5.49361	5.5334	0.263487	0.886516	-0.199507	0.919243	unknown protein; FUNCTIONS IN: molecular_function unknown; INVOLVED IN: biological_process unknown; LOCATED IN: mitochondrion, plasma membrane, plastid, vacuole; EXPRESSED IN: 27 plant structures; EXPRESSED DURING: 15 growth stages; Has 39 Blast hit /.../9 proteins in 13 species: Archae - 0; Bacteria - 0; Metazoa - 0; Fungi - 0; Plants - 39; Viruses - 0; Other Eukaryotes - 0 (source: NCBI BLink).…		2684234	2685621	1	1
AT1G08490	5.44864	5.43743	5.54134	5.4758	4.97609	5.13043	5.4819	5.19614	5.29232	5.43891	5.70558	5.47894	-0.279662	0.379484	0.00313327	0.996539	chloroplastic NIFS-like cysteine desulfurase [Source:TAIR_LOCUS;Acc:AT1G08490]	ATSUFS	2685659	2688595	-1	1	TAIR Gene Name
AT1G08500	1.17161	-0.140938	1.9654	0.998692	-0.60419	-0.247594	0.600961	-0.0836079	0.125586	-1.55686	0.707772	-0.241167	-1.0823	0.295266	-1.23986	0.209063	early nodulin-like protein 18 [Source:TAIR_LOCUS;Acc:AT1G08500]	ENODL18	2689016	2690045	1	1	TAIR Gene Name
AT1G08510	6.60244	6.52463	6.68579	6.60429	6.29938	6.4578	6.78004	6.51241	6.57488	6.10827	6.59127	6.42481	-0.0918827	0.937313	-0.179483	0.856949	fatty acyl-ACP thioesterases B [Source:TAIR_LOCUS;Acc:AT1G08510]	FATB	2691080	2694377	-1	1	TAIR Gene Name
AT1G08520	8.2205	7.18118	8.45833	7.95334	7.94646	6.74234	7.97669	7.55516	7.63591	6.91882	7.62004	7.39159	-0.398174	0.380867	-0.561748	0.162128	ALBINA 1 [Source:TAIR_LOCUS;Acc:AT1G08520]	ALB1	2696412	2700959	1	1	TAIR Gene Name
AT1G08530	4.24029	3.77272	4.54243	4.18515	3.92167	3.51346	3.6934	3.70951	3.68203	3.66613	3.71484	3.68766	-0.475637	0.136905	-0.497486	0.116548	unknown protein; FUNCTIONS IN: molecular_function unknown; INVOLVED IN: biological_process unknown; LOCATED IN: chloroplast; BEST Arabidopsis thaliana protein match is: unknown protein (TAIR:AT5G09995.2); Has 140 Blast hits to 140 proteins in 53 spe /.../Archae - 0; Bacteria - 63; Metazoa - 0; Fungi - 0; Plants - 76; Viruses - 0; Other Eukaryotes - 1 (source: NCBI BLink). [Source:TAIR_LOCUS;Acc:A…	AT1G08530	2701226	2703091	1	1	UniProtKB Gene Name
AT1G08540	6.98521	6.42362	7.36093	6.92325	6.85984	6.15183	6.97859	6.66342	6.47845	6.00827	6.34666	6.27779	-0.259831	0.637475	-0.645459	0.0939202	RNApolymerase sigma subunit 2 [Source:TAIR_LOCUS;Acc:AT1G08540]	SIGB	2703336	2706845	1	1	TAIR Gene Name
AT1G08550	8.26115	7.36436	8.86204	8.16252	8.41961	6.81413	7.81071	7.68148	7.56417	6.69385	7.42645	7.22816	-0.481033	0.510023	-0.934361	0.103507	non-photochemical quenching 1 [Source:TAIR_LOCUS;Acc:AT1G08550]	NPQ1	2706924	2709531	1	2	TAIR Gene Name
AT1G08560	1.58845	-0.559196	2.87085	1.30003	1.54095	1.11681	0.146075	0.93461	0.180972	-0.669662	1.81763	0.442979	-0.365422	0.887244	-0.857053	0.645212	syntaxin of plants 111 [Source:TAIR_LOCUS;Acc:AT1G08560]	SYP111	2709632	2710912	-1	1	TAIR Gene Name
AT1G08570	6.92481	6.65009	6.39879	6.6579	6.82595	6.58934	7.46365	6.95965	7.08466	6.33544	7.25616	6.89209	0.301748	0.622554	0.234191	0.733689	atypical CYS HIS rich thioredoxin 4 [Source:TAIR_LOCUS;Acc:AT1G08570]	ACHT4	2712883	2714734	1	4	TAIR Gene Name
AT1G08580	4.12756	3.68608	4.30142	4.03835	5.12395	4.5197	3.41459	4.35275	3.90002	4.01245	3.61488	3.84245	0.314394	0.829102	-0.195904	0.906332	unknown protein; Has 39 Blast hits to 39 proteins in 15 species: Archae - 0; Bacteria - 0; Metazoa - 0; Fungi - 0; Plants - 35; Viruses - 0; Other Eukaryotes - 4 (source: NCBI BLink). [Source:TAIR_LOCUS;Acc:AT1G08580]		2715079	2716404	-1	1
AT1G08592	2.07238	2.11443	2.23343	2.14008	2.33001	1.89429	2.04	2.0881	1.62478	2.10653	1.95522	1.89551	-0.051976	0.95633	-0.244567	0.696207	Potential natural antisense gene, locus overlaps with AT1G08590 [Source:TAIR_LOCUS;Acc:AT1G08592]		2718875	2721676	-1	1
AT1G08600	5.06537	5.32284	3.82062	4.73628	3.95764	4.76017	5.14215	4.61999	4.98191	5.22702	5.06454	5.09116	-0.116292	0.936672	0.354876	0.735652	P-loop containing nucleoside triphosphate hydrolases superfamily protein [Source:TAIR_LOCUS;Acc:AT1G08600]	ATRX	2723824	2733613	1	4	TAIR Gene Name
AT1G08610	3.51622	3.68149	2.7337	3.31047	4.08398	3.3536	3.12983	3.52247	3.19473	3.34338	2.75434	3.09748	0.211997	0.852511	-0.212991	0.851689	Pentatricopeptide repeat (PPR) superfamily protein [Source:TAIR_LOCUS;Acc:AT1G08610]		2733657	2735819	-1	1
AT1G08620	4.70183	4.7902	3.77675	4.42293	3.92427	4.22369	4.95626	4.36807	4.71581	4.84736	5.10919	4.89078	-0.0548534	0.969733	0.46786	0.56847	Transcription factor jumonji (jmj) family protein / zinc finger (C5HC2 type) family protein [Source:TAIR_LOCUS;Acc:AT1G08620]	PKDM7D	2736774	2743758	1	2	TAIR Gene Name
AT1G08630	-3.0345	1.66819	-5.99094	-2.45242	-0.493728	2.02899	-1.24291	0.0974501	1.41234	2.13172	0.794339	1.44614	2.54987	0.226195	3.89856	0.0460014	threonine aldolase 1 [Source:TAIR_LOCUS;Acc:AT1G08630]	THA1	2743761	2747967	-1	5	TAIR Gene Name
AT1G08640	7.02412	6.44788	7.17971	6.8839	7.10154	6.48106	6.56361	6.7154	6.4171	6.49627	6.40014	6.43783	-0.1685	0.83559	-0.446068	0.391782	Chloroplast J-like domain 1 [Source:TAIR_LOCUS;Acc:AT1G08640]	CJD1	2748398	2751278	-1	1	TAIR Gene Name
AT1G08650	5.23398	4.3917	6.50679	5.37749	6.91364	4.9197	6.69544	6.17626	6.3476	4.64176	6.73008	5.90648	0.798766	0.246717	0.528989	0.523251	phosphoenolpyruvate carboxylase kinase 1 [Source:TAIR_LOCUS;Acc:AT1G08650]	PPCK1	2752154	2753703	1	2	TAIR Gene Name
AT1G08660	5.35001	5.40325	6.11394	5.6224	5.83865	5.07194	5.37625	5.42895	5.40464	5.2696	5.26855	5.31426	-0.193454	0.763697	-0.308138	0.551487	MALE GAMETOPHYTE DEFECTIVE 2 [Source:TAIR_LOCUS;Acc:AT1G08660]	MGP2	2757041	2759794	-1	2	TAIR Gene Name
AT1G08680	4.72138	4.69481	4.04402	4.48674	4.1388	4.13581	4.96677	4.41379	4.77554	4.76624	4.97316	4.83831	-0.072943	0.95351	0.351574	0.657691	ARF GAP-like zinc finger-containing protein ZIGA4 [Source:TAIR_LOCUS;Acc:AT1G08680]	ZIGA4	2762584	2768967	1	4	TAIR Gene Name
AT1G08700	4.43939	4.50993	5.29217	4.74717	5.29835	4.55465	4.76706	4.87335	4.90291	4.62761	4.51663	4.68238	0.126188	0.906019	-0.0647835	0.956611	Presenilin-1 [Source:TAIR_LOCUS;Acc:AT1G08700]	PS1	2769815	2771477	-1	1	TAIR Gene Name
AT1G08710	3.29917	3.80259	3.47257	3.52478	3.7769	3.94627	3.47188	3.73168	3.73468	3.96458	3.57287	3.75738	0.206906	0.65405	0.232601	0.592805	F-box family protein [Source:TAIR_LOCUS;Acc:AT1G08710]	SKIP24	2771633	2773460	1	2	UniProtKB Gene Name
AT1G08720	5.04029	4.97414	4.18821	4.73421	4.37627	4.59012	5.38333	4.78324	5.14387	5.03785	5.38375	5.18849	0.0490281	0.972816	0.454279	0.57763	Protein kinase superfamily protein [Source:TAIR_LOCUS;Acc:AT1G08720]	EDR1	2774030	2779297	1	1	TAIR Gene Name
AT1G08750	4.02704	3.36964	3.39276	3.59648	3.24213	3.36631	3.84715	3.4852	3.54763	3.6049	3.79792	3.65015	-0.111286	0.873792	0.0536663	0.94789	Peptidase C13 family [Source:TAIR_LOCUS;Acc:AT1G08750]	AT1G08750/F22O13_24	2801067	2804537	1	3	UniProtKB Gene Name
AT1G08760	3.86066	4.3748	3.18582	3.80709	3.51333	3.76422	4.17215	3.81657	4.07142	4.19676	4.08497	4.11772	0.00947079	0.994131	0.310626	0.685707	Plant protein of unknown function (DUF936) [Source:TAIR_LOCUS;Acc:AT1G08760]		2805371	2808621	1	1
AT1G08770	2.28441	3.50833	3.89438	3.22904	3.85517	3.87487	3.42684	3.71896	3.58056	3.63146	3.82372	3.67858	0.489917	0.564234	0.449541	0.612695	prenylated RAB acceptor 1.E [Source:TAIR_LOCUS;Acc:AT1G08770]	PRA1.E	2808883	2809747	1	1	TAIR Gene Name
AT1G08780	3.98316	3.8173	5.01581	4.27209	4.94541	4.08881	3.52698	4.18707	3.7481	3.73712	3.47849	3.65457	-0.0850222	0.962182	-0.617519	0.538995	ABI3-interacting protein 3 [Source:TAIR_LOCUS;Acc:AT1G08780]	AIP3	2809778	2811191	-1	1	TAIR Gene Name
AT1G08800	4.81991	4.18736	2.74125	3.91617	4.06524	4.52676	5.35079	4.6476	5.32585	5.20743	6.06693	5.5334	0.731425	0.555051	1.61723	0.0821323	Protein of unknown function, DUF593 [Source:TAIR_LOCUS;Acc:AT1G08800]	AT1G08800/F22O13_29	2813061	2818008	-1	2	UniProtKB Gene Name
AT1G08810	3.58455	3.54164	3.75431	3.62683	3.19589	2.98858	1.48138	2.55528	2.85544	2.57415	1.44273	2.29077	-1.07155	0.21602	-1.33606	0.104465	myb domain protein 60 [Source:TAIR_LOCUS;Acc:AT1G08810]	MYB60	2819065	2820395	-1	2	TAIR Gene Name
AT1G08820	5.15708	6.09345	5.34144	5.53066	5.79305	6.07832	5.68206	5.85114	5.65864	5.95768	5.58594	5.73409	0.320489	0.320728	0.203432	0.613046	vamp/synaptobrevin-associated protein 27-2 [Source:TAIR_LOCUS;Acc:AT1G08820]	VAP27-2	2821552	2825275	-1	2	TAIR Gene Name
AT1G08830	5.58565	6.37243	7.20884	6.38897	7.47912	7.44175	5.43724	6.78604	6.26999	7.16483	7.14207	6.85896	0.397064	0.811914	0.469987	0.761983	copper/zinc superoxide dismutase 1 [Source:TAIR_LOCUS;Acc:AT1G08830]	CSD1	2827061	2829315	1	2	TAIR Gene Name
AT1G08840	4.00527	3.69065	3.35365	3.68319	2.62918	2.53774	3.20291	2.78994	2.70172	2.91173	3.0411	2.88485	-0.893249	0.128703	-0.798343	0.185447	DNA replication helicase, putative [Source:TAIR_LOCUS;Acc:AT1G08840]	emb2411	2829105	2838469	-1	2	TAIR Gene Name
AT1G08845	2.35496	2.81127	3.12917	2.76513	3.51677	2.92117	2.1025	2.84681	2.59085	2.76696	2.02832	2.46204	0.0816806	0.959409	-0.30309	0.801567	Ribosomal L18p/L5e family protein [Source:TAIR_LOCUS;Acc:AT1G08845]		2838789	2840994	1	2
AT1G08880	5.35628	5.93964	6.09578	5.79723	5.88491	5.98105	5.47897	5.78164	5.62322	5.99863	5.76916	5.797	-0.0155919	0.988673	-0.000235054	0.999801	Histone superfamily protein [Source:TAIR_LOCUS;Acc:AT1G08880]	HTA5	2846949	2847800	-1	1	TAIR Gene Name
AT1G08890	6.89552	7.20995	6.79843	6.96797	5.88898	6.24021	7.12803	6.41907	6.60011	6.23743	6.89135	6.5763	-0.548893	0.546279	-0.391669	0.714651	Major facilitator superfamily protein [Source:TAIR_LOCUS;Acc:AT1G08890]	SUGTL4	2848348	2852270	1	1	UniProtKB Gene Name
AT1G08900	6.16808	5.19591	5.55683	5.64027	5.21052	4.88831	5.79489	5.2979	5.74408	5.17792	6.00706	5.64302	-0.342368	0.621863	0.00274836	0.998189	Major facilitator superfamily protein [Source:TAIR_LOCUS;Acc:AT1G08900]	SUGTL3	2852454	2855779	1	3	UniProtKB Gene Name
AT1G08910	4.60251	4.6777	3.61607	4.29876	3.87678	3.82291	4.75376	4.15115	4.62607	4.50066	4.50234	4.54302	-0.147609	0.921746	0.244266	0.853398	zinc ion binding;zinc ion binding [Source:TAIR_LOCUS;Acc:AT1G08910]	EMB3001	2856227	2861170	1	1	UniProtKB Gene Name
AT1G08920	6.32212	4.83716	6.34647	5.83525	5.44593	6.48178	6.53213	6.15328	5.87567	5.06473	6.03373	5.65804	0.318029	0.746732	-0.177206	0.884055	ERD (early response to dehydration) six-like 1 [Source:TAIR_LOCUS;Acc:AT1G08920]	ESL1	2867259	2870656	1	3	TAIR Gene Name
AT1G08930	7.18946	7.30752	7.16877	7.22192	7.23438	6.98349	7.37363	7.19717	8.09171	7.55721	8.29387	7.98093	-0.0247473	0.980201	0.759014	0.0636769	Major facilitator superfamily protein [Source:TAIR_LOCUS;Acc:AT1G08930]	ERD6	2873465	2877270	1	2	TAIR Gene Name
AT1G08940	0.686162	1.32091	2.12287	1.37665	3.00936	3.02515	2.09484	2.70978	3.3052	3.16667	3.39826	3.29005	1.33314	0.124308	1.9134	0.0238046	Phosphoglycerate mutase family protein [Source:TAIR_LOCUS;Acc:AT1G08940]	F7G19.18	2877692	2879169	1	1	UniProtKB Gene Name
AT1G08960	3.15203	3.45822	2.53979	3.05002	2.86142	3.33109	3.41766	3.20339	3.18154	3.44431	3.3564	3.32742	0.153373	0.803359	0.277402	0.553171	cation exchanger 11 [Source:TAIR_LOCUS;Acc:AT1G08960]	CAX11	2879642	2882231	1	1	TAIR Gene Name
AT1G08970	4.80165	5.60435	5.7073	5.3711	5.96169	5.7895	5.354	5.70173	5.4793	5.58303	5.3282	5.46351	0.330629	0.636922	0.092407	0.931003	nuclear factor Y, subunit C9 [Source:TAIR_LOCUS;Acc:AT1G08970]	HAP5C	2882524	2884337	1	4	TAIR Gene Name
AT1G08980	6.29055	5.80549	6.78374	6.29326	6.75533	5.23299	7.00277	6.33036	6.88265	5.50864	6.85044	6.41391	0.0370999	0.980263	0.120648	0.92851	amidase 1 [Source:TAIR_LOCUS;Acc:AT1G08980]	ATAMI1	2884411	2886620	1	1	TAIR Gene Name
AT1G09010	6.65487	5.70761	6.07275	6.14507	5.69271	5.09865	6.71426	5.83521	6.30895	5.61471	6.59984	6.1745	-0.309867	0.721275	0.0294238	0.982248	glycoside hydrolase family 2 protein [Source:TAIR_LOCUS;Acc:AT1G09010]	EBM	2895166	2899384	-1	1	UniProtKB Gene Name
AT1G09020	5.29642	5.6476	4.72039	5.22147	4.76704	5.29117	5.65111	5.23644	5.27258	5.45128	5.53858	5.42081	0.0149714	0.990343	0.199343	0.825056	homolog of yeast sucrose nonfermenting 4 [Source:TAIR_LOCUS;Acc:AT1G09020]	SNF4	2899914	2904815	-1	1	TAIR Gene Name
AT1G09040	2.81242	2.27004	1.50309	2.19518	2.14948	2.05289	2.32847	2.17695	2.25943	2.24572	2.34669	2.28395	-0.0182361	0.986215	0.0887628	0.924817	unknown protein; FUNCTIONS IN: molecular_function unknown; INVOLVED IN: biological_process unknown; LOCATED IN: membrane; EXPRESSED IN: leaf; BEST Arabidopsis thaliana protein match is: unknown protein (TAIR:AT1G09050.1); Has 614 Blast hits to 567 p /.../s in 104 species: Archae - 2; Bacteria - 12; Metazoa - 344; Fungi - 31; Plants - 81; Viruses - 0; Other Eukaryotes - 144 (source: NCBI BLink). […	F7G19.9	2911317	2915369	1	1	UniProtKB Gene Name
AT1G09050	3.13026	2.36513	1.90002	2.46513	2.25883	2.10717	2.85389	2.40663	2.57574	2.00105	2.51496	2.36392	-0.0585055	0.968273	-0.101218	0.942727	unknown protein; BEST Arabidopsis thaliana protein match is: unknown protein (TAIR:AT1G09040.1); Has 552 Blast hits to 499 proteins in 115 species: Archae - 0; Bacteria - 86; Metazoa - 259; Fungi - 14; Plants - 77; Viruses - 0; Other Eukaryotes - 11 /.../rce: NCBI BLink). [Source:TAIR_LOCUS;Acc:AT1G09050]	F7G19.8	2918031	2920889	1	1	UniProtKB Gene Name
AT1G09060	5.42424	4.95346	4.45634	4.94468	4.57555	4.45011	5.37389	4.79985	5.21008	4.98937	5.42887	5.20944	-0.144833	0.907982	0.264759	0.800146	Zinc finger, RING-type;Transcription factor jumonji/aspartyl beta-hydroxylase [Source:TAIR_LOCUS;Acc:AT1G09060]	F7G19.7	2921064	2925762	-1	3	UniProtKB Gene Name
AT1G09070	5.74581	6.53001	6.61434	6.29672	8.3852	7.70744	6.80776	7.63347	7.94181	7.35397	6.98868	7.42815	1.33675	0.132969	1.13144	0.222974	soybean gene regulated by cold-2 [Source:TAIR_LOCUS;Acc:AT1G09070]	SRC2	2927703	2928968	1	1	TAIR Gene Name
AT1G09080	0.0140135	0.0151663	-0.483595	-0.151472	2.62287	1.81257	1.52769	1.98771	2.18145	2.06133	1.91723	2.05334	2.13918	0.0210501	2.20481	0.0176834	Heat shock protein 70 (Hsp 70) family protein [Source:TAIR_LOCUS;Acc:AT1G09080]	BIP3	2929217	2931841	-1	2	TAIR Gene Name
AT1G09100	4.51277	5.46752	4.55339	4.84456	5.09742	5.2501	5.34194	5.22982	5.25179	5.52512	5.3255	5.36747	0.385256	0.39407	0.522911	0.193419	26S proteasome AAA-ATPase subunit RPT5B [Source:TAIR_LOCUS;Acc:AT1G09100]	RPT5B	2936528	2939326	-1	1	TAIR Gene Name
AT1G09130	7.64335	8.3416	8.45423	8.14639	8.45441	8.10066	8.13275	8.22927	8.04445	8.11198	7.8226	7.99301	0.0828813	0.927245	-0.153382	0.842946	ATP-dependent caseinolytic (Clp) protease/crotonase family protein [Source:TAIR_LOCUS;Acc:AT1G09130]	CLPR3	2939570	2942288	-1	3	UniProtKB Gene Name
AT1G09140	6.121	6.52146	6.07352	6.23866	5.67164	6.52123	6.18157	6.12481	5.98644	6.59027	6.15761	6.24477	-0.113853	0.819879	0.00611241	0.992949	SERINE-ARGININE PROTEIN 30 [Source:TAIR_LOCUS;Acc:AT1G09140]	ATSRP30	2942564	2945961	-1	2	TAIR Gene Name
AT1G09150	5.21513	5.10088	5.66498	5.327	5.47769	5.03586	5.01114	5.1749	5.09277	5.09111	4.99258	5.05882	-0.152104	0.79017	-0.268181	0.541044	pseudouridine synthase and archaeosine transglycosylase (PUA) domain-containing protein [Source:TAIR_LOCUS;Acc:AT1G09150]		2946229	2949159	1	1
AT1G09160	4.61039	4.1922	4.61957	4.47405	4.05815	3.93568	4.12031	4.03804	3.97601	3.7269	3.96954	3.89082	-0.436011	0.116584	-0.583233	0.0316327	Protein phosphatase 2C family protein [Source:TAIR_LOCUS;Acc:AT1G09160]		2952771	2955689	-1	2
AT1G09180	1.66112	0.941501	1.57161	1.39141	0.819891	1.47726	2.20575	1.50097	1.12108	0.612343	1.0619	0.931773	0.109556	0.954519	-0.459637	0.726873	secretion-associated RAS super family 1 [Source:TAIR_LOCUS;Acc:AT1G09180]	ATSAR1	2965023	2965972	1	1	TAIR Gene Name
AT1G09190	1.15733	2.11443	1.745	1.67225	2.39789	2.74223	1.51625	2.21879	1.63462	2.28553	1.45605	1.79207	0.546537	0.369317	0.119814	0.914108	Tetratricopeptide repeat (TPR)-like superfamily protein [Source:TAIR_LOCUS;Acc:AT1G09190]	PCMP-E70	2966120	2967718	-1	1	UniProtKB Gene Name
AT1G09195	4.21465	4.12127	3.45418	3.93003	3.06646	3.8412	4.24138	3.71634	3.9817	4.18638	4.12287	4.09698	-0.213688	0.842826	0.166947	0.885605	FUNCTIONS IN: molecular_function unknown; INVOLVED IN: biological_process unknown; LOCATED IN: mitochondrion; CONTAINS InterPro DOMAIN/s: Metal-dependent phosphohydrolase, HD subdomain (InterPro:IPR006674), Ppx/GppA phosphatase (InterPro:IPR003695); /.../0201 Blast hits to 17322 proteins in 780 species: Archae - 12; Bacteria - 1396; Metazoa - 17338; Fungi - 3422; Plants - 5037; Viruses - 0; Other…	PPX	2967940	2971498	-1	2	UniProtKB Gene Name
AT1G09200	2.92633	1.30895	5.91266	3.38264	4.04147	2.91685	3.05679	3.33837	3.7234	2.26861	4.39811	3.46337	-0.0442728	0.990038	0.0807268	0.98158	Histone superfamily protein [Source:TAIR_LOCUS;Acc:AT1G09200]	HTR2	2971593	2972199	-1	1	UniProtKB Gene Name
AT1G09210	6.6263	6.5643	7.6973	6.96263	8.57768	7.02898	6.86951	7.49206	7.01723	7.02395	6.98556	7.00891	0.529424	0.732235	0.046281	0.984166	calreticulin 1b [Source:TAIR_LOCUS;Acc:AT1G09210]	CRT1b	2972842	2976750	-1	1	TAIR Gene Name
AT1G09220	0.583063	1.91647	1.12505	1.20819	1.58014	1.97161	1.63733	1.72969	1.43507	1.96643	1.19506	1.53218	0.521497	0.303826	0.32399	0.611297	Pentatricopeptide repeat (PPR) superfamily protein [Source:TAIR_LOCUS;Acc:AT1G09220]	PCMP-E25	2977792	2979466	-1	1	UniProtKB Gene Name
AT1G09230	4.06005	4.1938	3.71225	3.9887	3.7213	3.84573	4.24829	3.93844	4.26373	4.14866	4.16181	4.1914	-0.0502584	0.96412	0.202698	0.810085	RNA-binding (RRM/RBD/RNP motifs) family protein [Source:TAIR_LOCUS;Acc:AT1G09230]	AT1G09230	2979520	2982624	-1	1	UniProtKB Gene Name
AT1G09240	2.22401	3.98849	1.745	2.6525	3.75375	5.12394	5.47529	4.78433	4.22283	4.87064	5.22286	4.77211	2.13183	0.0456167	2.11961	0.0469315	nicotianamine synthase 3 [Source:TAIR_LOCUS;Acc:AT1G09240]	NAS3	2984881	2986130	1	1	TAIR Gene Name
AT1G09250	1.72062	2.39359	5.05509	3.05644	4.40646	3.10323	3.3485	3.61939	3.55784	2.61038	3.2152	3.12781	0.562957	0.765179	0.0713699	0.979498	basic helix-loop-helix (bHLH) DNA-binding superfamily protein [Source:TAIR_LOCUS;Acc:AT1G09250]	BHLH149/AtbHLH149	2989378	2990357	1	1	UniProtKB Gene Name
AT1G09270	5.35706	5.61275	5.49845	5.48942	5.20296	5.55879	5.51451	5.42542	5.38711	5.6457	5.67058	5.56779	-0.0640038	0.917761	0.0783729	0.894233	importin alpha isoform 4 [Source:TAIR_LOCUS;Acc:AT1G09270]	IMPA-4	2994369	2998222	1	3	TAIR Gene Name
AT1G09280	3.92743	3.74002	3.97111	3.87952	4.22584	3.74249	4.12031	4.02954	4.27454	4.05713	4.28016	4.20394	0.150026	0.73937	0.324427	0.30011	CONTAINS InterPro DOMAIN/s: Rhodanese-like (InterPro:IPR001763), Serine hydrolase (InterPro:IPR005645); BEST Arabidopsis thaliana protein match is: Rhodanese/Cell cycle control phosphatase superfamily protein (TAIR:AT2G40760.1); Has 5925 Blast hits /.../2 proteins in 1592 species: Archae - 0; Bacteria - 2946; Metazoa - 156; Fungi - 408; Plants - 229; Viruses - 0; Other Eukaryotes - 2186 (source: …	STR6	2998100	3001315	-1	1	UniProtKB Gene Name
AT1G09290	3.57652	3.62765	3.36353	3.52257	3.80534	3.44027	3.2381	3.49457	3.31127	3.33531	3.30964	3.31874	-0.0279978	0.974635	-0.203827	0.724482	unknown protein; Has 73 Blast hits to 71 proteins in 26 species: Archae - 0; Bacteria - 0; Metazoa - 5; Fungi - 11; Plants - 54; Viruses - 0; Other Eukaryotes - 3 (source: NCBI BLink). [Source:TAIR_LOCUS;Acc:AT1G09290]		3001517	3003762	-1	1
AT1G09300	3.24953	3.99589	3.25634	3.50059	4.11621	4.0303	3.36451	3.83701	3.60538	3.90423	3.28009	3.59657	0.336419	0.623795	0.0959792	0.92732	Metallopeptidase M24 family protein [Source:TAIR_LOCUS;Acc:AT1G09300]	T31J12.2	3003495	3008213	1	2	UniProtKB Gene Name
AT1G09310	10.0387	10.2982	11.3621	10.5663	10.5749	10.0774	10.3857	10.346	9.32747	9.36389	8.99357	9.22831	-0.220357	0.93336	-1.33801	0.32123	Protein of unknown function, DUF538 [Source:TAIR_LOCUS;Acc:AT1G09310]	T31J12.3	3009055	3009880	1	1	UniProtKB Gene Name
AT1G09320	3.34086	3.3291	2.656	3.10865	3.36511	3.32459	3.3388	3.34283	3.49277	3.48131	3.21129	3.39513	0.234181	0.489902	0.286473	0.352754	agenet domain-containing protein [Source:TAIR_LOCUS;Acc:AT1G09320]	AT1G09320	3009941	3012363	-1	1	UniProtKB Gene Name
AT1G09330	5.11334	4.92284	5.20385	5.08001	5.17893	5.04177	4.9025	5.04107	4.91573	5.02878	5.07422	5.00624	-0.0389465	0.9529	-0.0737691	0.899793	unknown protein; FUNCTIONS IN: molecular_function unknown; INVOLVED IN: biological_process unknown; LOCATED IN: integral to membrane; EXPRESSED IN: 24 plant structures; EXPRESSED DURING: 15 growth stages; CONTAINS InterPro DOMAIN/s: Protein of unkno /.../ction DUF846, eukaryotic (InterPro:IPR008564); Has 518 Blast hits to 518 proteins in 206 species: Archae - 0; Bacteria - 0; Metazoa - 193; Fungi…	ECH	3012762	3015091	-1	1	UniProtKB Gene Name
AT1G09340	9.59754	8.64641	10.9072	9.71705	9.83657	8.59597	9.22892	9.22049	8.68293	8.30877	8.40969	8.46713	-0.496561	0.776186	-1.24992	0.270748	chloroplast RNA binding [Source:TAIR_LOCUS;Acc:AT1G09340]	CRB	3015328	3018234	1	1	TAIR Gene Name
AT1G09350	5.65847	7.22441	5.1262	6.00303	5.475	6.6693	6.16706	6.10379	5.64458	5.71704	5.21704	5.52622	0.10076	0.958169	-0.476808	0.708875	galactinol synthase 3 [Source:TAIR_LOCUS;Acc:AT1G09350]	AtGolS3	3019819	3021441	1	1	TAIR Gene Name
AT1G09390	4.51977	1.59139	4.73396	3.61504	4.52305	0.794861	4.26203	3.19331	3.85736	0.990438	3.73402	2.8606	-0.421729	0.643079	-0.754437	0.273845	GDSL-like Lipase/Acylhydrolase superfamily protein [Source:TAIR_LOCUS;Acc:AT1G09390]		3031203	3033582	1	1
AT1G09410	0.800879	1.10271	-0.123194	0.593466	0.177132	0.696585	0.464686	0.446134	0.660793	0.716621	0.438748	0.605387	-0.147332	0.896454	0.0119212	0.99313	pentatricopeptide (PPR) repeat-containing protein [Source:TAIR_LOCUS;Acc:AT1G09410]	PCMP-H18	3035443	3037560	1	1	UniProtKB Gene Name
AT1G09415	4.84575	3.3923	6.30414	4.8474	6.11115	4.02031	4.46267	4.86471	5.104	4.1302	4.81266	4.68228	0.0173077	0.994334	-0.165117	0.939956	NIM1-interacting 3 [Source:TAIR_LOCUS;Acc:AT1G09415]	NIMIN-3	3037754	3038408	-1	1	TAIR Gene Name
AT1G09420	2.12471	2.30043	2.95779	2.46098	2.98983	2.43253	2.13276	2.51837	3.19144	3.47644	2.84803	3.17197	0.0573945	0.971704	0.710991	0.364875	glucose-6-phosphate dehydrogenase 4 [Source:TAIR_LOCUS;Acc:AT1G09420]	G6PD4	3038462	3041873	-1	2	TAIR Gene Name
AT1G09430	6.67381	5.49569	7.29461	6.48804	7.18911	5.96616	6.66157	6.60561	6.8456	6.21193	7.12438	6.7273	0.117578	0.903298	0.239267	0.754347	ATP-citrate lyase A-3 [Source:TAIR_LOCUS;Acc:AT1G09430]	ACLA-3	3041996	3045402	1	1	TAIR Gene Name
AT1G09440	3.86286	2.79004	2.95779	3.20357	2.83432	2.20282	2.96733	2.66816	2.74735	1.8723	2.45663	2.35876	-0.535409	0.511903	-0.844807	0.208575	Protein kinase superfamily protein [Source:TAIR_LOCUS;Acc:AT1G09440]	F14J9.10	3045513	3047893	-1	1	UniProtKB Gene Name
AT1G09480	-0.344052	1.75874	-0.785015	0.20989	2.37561	3.11834	2.09484	2.5296	3.26828	3.987	3.49144	3.58224	2.31971	0.0598614	3.37235	0.00773586	NAD(P)-binding Rossmann-fold superfamily protein [Source:TAIR_LOCUS;Acc:AT1G09480]	F14J9.14	3057975	3060661	1	1	UniProtKB Gene Name
AT1G09490	5.6572	5.1204	4.97545	5.25102	4.85345	5.03487	5.57071	5.15301	5.11855	4.73206	4.96044	4.93702	-0.0980046	0.92119	-0.314	0.635773	NAD(P)-binding Rossmann-fold superfamily protein [Source:TAIR_LOCUS;Acc:AT1G09490]	F14J9.15	3064124	3065937	1	2	UniProtKB Gene Name
AT1G09500	-1.00198	-3.39592	-2.02567	-2.14119	0.506933	5.61064	3.64965	3.25574	3.94339	2.98931	5.15857	4.03042	5.39693	0.0140273	6.17161	0.00617713	NAD(P)-binding Rossmann-fold superfamily protein [Source:TAIR_LOCUS;Acc:AT1G09500]	F14J9.16	3066699	3068598	1	3	UniProtKB Gene Name
AT1G09520	3.4965	3.20973	3.99048	3.56557	4.21098	3.51631	3.54676	3.75802	3.6225	3.35406	3.20737	3.39465	0.19245	0.838257	-0.170923	0.861306	LOCATED IN: chloroplast; EXPRESSED IN: 21 plant structures; EXPRESSED DURING: 12 growth stages; CONTAINS InterPro DOMAIN/s: Zinc finger, PHD-type, conserved site (InterPro:IPR019786); BEST Arabidopsis thaliana protein match is: PHD finger family pro /.../TAIR:AT3G17460.1); Has 56 Blast hits to 56 proteins in 17 species: Archae - 0; Bacteria - 2; Metazoa - 0; Fungi - 4; Plants - 46; Viruses - 0; O…	F14J9.18	3070946	3072050	-1	1	UniProtKB Gene Name
AT1G09530	4.39442	3.19368	3.94156	3.84322	4.08398	3.49623	4.9382	4.1728	4.34364	3.12981	3.81603	3.76316	0.329585	0.619293	-0.0800598	0.939259	phytochrome interacting factor 3 [Source:TAIR_LOCUS;Acc:AT1G09530]	PIF3/PAP3/POC1/AtbHLH8	3076582	3079539	1	2	TAIR Gene Name
AT1G09560	4.59059	3.90446	4.56644	4.35383	5.05129	5.68664	5.71796	5.4853	6.67409	5.78061	6.66128	6.37199	1.13147	0.145755	2.01816	0.00870533	germin-like protein 5 [Source:TAIR_LOCUS;Acc:AT1G09560]	GLP5	3093839	3094864	1	1	TAIR Gene Name
AT1G09570	6.58753	6.25889	6.7025	6.51631	6.44172	5.58865	7.11417	6.38151	6.85722	6.11371	7.51544	6.82879	-0.134796	0.887785	0.312482	0.653315	phytochrome A [Source:TAIR_LOCUS;Acc:AT1G09570]	PHYA	3095256	3100357	-1	2	TAIR Gene Name
AT1G09575	2.41022	-1.0244	2.1902	1.19201	2.02179	-1.67415	1.51625	0.621296	1.7922	-1.73079	1.86829	0.643234	-0.570713	0.392867	-0.548775	0.419512	Protein of unknown function (DUF607) [Source:TAIR_LOCUS;Acc:AT1G09575]		3101671	3102925	-1	1
AT1G09580	2.68377	2.01519	3.16906	2.62267	2.09611	2.52073	2.40485	2.34056	2.38061	2.01467	2.11476	2.17001	-0.282112	0.693939	-0.452665	0.424492	emp24/gp25L/p24 family/GOLD family protein [Source:TAIR_LOCUS;Acc:AT1G09580]		3104588	3106290	1	1
AT1G09590	5.0266	5.71208	6.69796	5.81221	7.21398	6.46511	5.831	6.50336	5.92586	6.02735	5.96956	5.97426	0.691148	0.57238	0.162046	0.935481	Translation protein SH3-like family protein [Source:TAIR_LOCUS;Acc:AT1G09590]	RPL21A	3106502	3107772	1	1	UniProtKB Gene Name
AT1G09620	6.89094	6.69325	5.92982	6.50467	5.87399	6.15002	6.86895	6.29765	6.51826	6.58916	6.99885	6.70209	-0.20702	0.830828	0.197419	0.84111	ATP binding;leucine-tRNA ligases;aminoacyl-tRNA ligases;nucleotide binding;ATP binding;aminoacyl-tRNA ligases [Source:TAIR_LOCUS;Acc:AT1G09620]	F21M12.1	3112778	3116699	-1	1	UniProtKB Gene Name
AT1G09630	4.25546	3.88266	4.48179	4.20664	4.42317	3.95678	3.90082	4.09359	3.77457	3.57328	3.75563	3.70116	-0.113049	0.892197	-0.505477	0.259256	RAB GTPase 11C [Source:TAIR_LOCUS;Acc:AT1G09630]	ATRAB11C	3118203	3119708	-1	1	TAIR Gene Name
AT1G09640	7.25047	7.3031	7.06252	7.20537	7.65649	7.52682	7.60221	7.59517	7.52848	7.53176	7.90453	7.65492	0.389808	0.290562	0.449559	0.200927	Translation elongation factor EF1B, gamma chain [Source:TAIR_LOCUS;Acc:AT1G09640]	AT1G09640	3119878	3122526	1	2	UniProtKB Gene Name
AT1G09645	4.50856	4.39869	4.97053	4.62593	4.95828	4.64432	4.31074	4.63778	4.61762	4.50425	4.66656	4.59614	0.0118546	0.991202	-0.0297817	0.977588	unknown protein; BEST Arabidopsis thaliana protein match is: unknown protein (TAIR:AT1G57765.1); Has 35333 Blast hits to 34131 proteins in 2444 species: Archae - 798; Bacteria - 22429; Metazoa - 974; Fungi - 991; Plants - 531; Viruses - 0; Other Euk /.../s - 9610 (source: NCBI BLink). [Source:TAIR_LOCUS;Acc:AT1G09645]		3122956	3124578	1	1
AT1G09660	3.92953	4.64169	4.22146	4.26423	4.21098	4.59684	4.2807	4.36284	4.42625	4.68236	4.1187	4.40911	0.0986127	0.887216	0.144882	0.81433	RNA-binding KH domain-containing protein [Source:TAIR_LOCUS;Acc:AT1G09660]		3127771	3131094	-1	2
AT1G09680	2.53701	2.42151	1.03131	1.99661	1.67978	2.42645	2.37984	2.16202	2.70172	2.48913	2.18035	2.45707	0.165413	0.896219	0.460456	0.58972	Pentatricopeptide repeat (PPR) superfamily protein [Source:TAIR_LOCUS;Acc:AT1G09680]		3134107	3135930	-1	1
AT1G09690	6.19631	6.27782	7.66948	6.71454	7.93093	6.96483	7.01193	7.30256	6.76658	6.55535	7.03086	6.78427	0.588027	0.562364	0.0697272	0.969035	Translation protein SH3-like family protein [Source:TAIR_LOCUS;Acc:AT1G09690]	RPL21A	3136188	3137475	-1	1	UniProtKB Gene Name
AT1G09700	3.10814	3.01518	3.61607	3.24646	4.01731	3.1333	2.69573	3.28211	2.8596	2.83736	2.44334	2.71343	0.0356527	0.981079	-0.533031	0.500396	dsRNA-binding domain-like superfamily protein [Source:TAIR_LOCUS;Acc:AT1G09700]	HYL1	3137767	3140353	-1	1	TAIR Gene Name
AT1G09710	2.7231	3.48481	2.84302	3.01698	3.03819	3.10702	3.00051	3.04857	3.3052	3.44681	3.1015	3.2845	0.0315942	0.982077	0.267527	0.790923	Homeodomain-like superfamily protein [Source:TAIR_LOCUS;Acc:AT1G09710]		3140868	3144370	1	2
AT1G09730	5.35863	5.34751	5.83102	5.51239	5.73323	5.20781	5.15324	5.36476	5.26415	5.34851	5.19157	5.26807	-0.147627	0.85263	-0.244311	0.70722	Cysteine proteinases superfamily protein [Source:TAIR_LOCUS;Acc:AT1G09730]	ULP2B	3147667	3154380	-1	2	UniProtKB Gene Name
AT1G09740	3.12659	2.98936	3.9114	3.34245	4.04625	3.58582	3.64704	3.7597	4.62487	4.1456	4.924	4.56482	0.41725	0.547132	1.22237	0.0191536	Adenine nucleotide alpha hydrolases-like superfamily protein [Source:TAIR_LOCUS;Acc:AT1G09740]	F21M12.12	3154532	3156275	1	1	UniProtKB Gene Name
AT1G09750	4.75971	3.9922	7.23181	5.32791	6.05112	3.40991	5.98677	5.14927	5.76155	2.85632	5.47181	4.69656	-0.178637	0.929118	-0.631348	0.631391	Eukaryotic aspartyl protease family protein [Source:TAIR_LOCUS;Acc:AT1G09750]	F21M12.13	3157501	3159148	1	1	UniProtKB Gene Name
AT1G09760	5.19254	4.85451	5.50758	5.18488	5.46959	4.87842	4.75982	5.03594	4.83286	4.78793	4.90724	4.84268	-0.148935	0.855213	-0.3422	0.549078	U2 small nuclear ribonucleoprotein A [Source:TAIR_LOCUS;Acc:AT1G09760]	U2A'	3159125	3161692	-1	1	TAIR Gene Name
AT1G09770	6.65487	6.77799	6.9222	6.78502	7.20628	6.28678	6.90324	6.79877	6.83106	6.56444	6.90283	6.76611	0.0137515	0.986936	-0.0189046	0.981866	cell division cycle 5 [Source:TAIR_LOCUS;Acc:AT1G09770]	ATCDC5	3161841	3165360	1	1	TAIR Gene Name
AT1G09780	6.91794	5.85229	7.04789	6.60604	7.45237	6.60397	6.97288	7.00974	6.65073	6.35787	6.95339	6.654	0.403698	0.537029	0.0479552	0.967331	Phosphoglycerate mutase, 2,3-bisphosphoglycerate-independent [Source:TAIR_LOCUS;Acc:AT1G09780]	PGM1	3165370	3167869	-1	1	UniProtKB Gene Name
AT1G09794	1.91146	1.69596	2.1902	1.93254	0.819891	2.04497	1.35865	1.40784	1.49035	1.61921	1.75438	1.62131	-0.524702	0.440202	-0.311229	0.722854	Cox19 family protein (CHCH motif) [Source:TAIR_LOCUS;Acc:AT1G09794]		3172108	3173463	1	1
AT1G09795	6.92112	7.41462	7.36381	7.23318	6.94821	7.1452	7.11511	7.06951	6.74851	7.07226	6.80478	6.87518	-0.163677	0.782673	-0.358001	0.381518	ATP phosphoribosyl transferase 2 [Source:TAIR_LOCUS;Acc:AT1G09795]	ATATP-PRT2	3173534	3176910	1	1	TAIR Gene Name
AT1G09800	1.56699	2.30644	1.43121	1.76821	1.48701	2.05289	1.60531	1.71507	1.52251	1.99419	1.5584	1.6917	-0.0531464	0.968683	-0.0765123	0.953926	Pseudouridine synthase family protein [Source:TAIR_LOCUS;Acc:AT1G09800]		3176883	3180421	-1	1
AT1G09810	3.59519	3.93559	3.14068	3.55715	3.51333	3.52483	3.27585	3.43801	3.58805	3.80282	3.33501	3.57529	-0.119147	0.769448	0.0181422	0.975418	evolutionarily conserved C-terminal region 11 [Source:TAIR_LOCUS;Acc:AT1G09810]	ECT11	3180936	3184224	-1	1	TAIR Gene Name
AT1G09815	2.93891	4.14641	4.66681	3.91738	4.56386	4.1651	3.47188	4.06695	3.77894	4.06201	3.69259	3.84451	0.149569	0.93389	-0.0728617	0.970105	polymerase delta 4 [Source:TAIR_LOCUS;Acc:AT1G09815]	POLD4	3189369	3190242	1	1	TAIR Gene Name
AT1G09820	2.49787	2.14827	1.99076	2.2123	1.99291	1.96322	2.02394	1.99336	1.66372	1.81114	1.89786	1.79091	-0.218936	0.71821	-0.42139	0.341414	Pentatricopeptide repeat (PPR-like) superfamily protein [Source:TAIR_LOCUS;Acc:AT1G09820]		3190288	3192414	-1	1
AT1G09830	5.10499	5.51758	5.59377	5.40545	6.00553	5.24157	5.28846	5.51185	5.13211	5.3643	4.94879	5.1484	0.106404	0.931554	-0.257047	0.791877	Glycinamide ribonucleotide (GAR) synthetase [Source:TAIR_LOCUS;Acc:AT1G09830]	PUR2	3192681	3195025	-1	1	UniProtKB Gene Name
AT1G09840	5.59628	5.49958	5.06128	5.38571	4.60518	5.3629	5.43194	5.13334	5.24635	5.35643	5.24969	5.28416	-0.25237	0.725078	-0.101557	0.916815	shaggy-like protein kinase 41 [Source:TAIR_LOCUS;Acc:AT1G09840]	ATSK41	3195824	3200291	-1	6	TAIR Gene Name
AT1G09850	5.01278	5.41359	5.49501	5.30712	5.42374	5.50499	5.55478	5.4945	5.11001	5.39794	5.29547	5.26781	0.187377	0.768711	-0.0393177	0.965103	xylem bark cysteine peptidase 3 [Source:TAIR_LOCUS;Acc:AT1G09850]	XBCP3	3201799	3204150	1	1	TAIR Gene Name
AT1G09870	4.782	4.26438	3.96133	4.3359	3.85244	4.26822	4.67256	4.26441	4.32445	4.31176	4.85574	4.49732	-0.0714963	0.950918	0.161417	0.869303	histidine acid phosphatase family protein [Source:TAIR_LOCUS;Acc:AT1G09870]	F21M12.26	3205741	3208598	1	1	UniProtKB Gene Name
AT1G09890	1.05317	-1.71717	-0.070894	-0.244965	-0.0399955	-0.941489	-0.620133	-0.533872	-0.641026	-2.28896	0.267605	-0.887461	-0.288908	0.877117	-0.642497	0.638736	Rhamnogalacturonate lyase family protein [Source:TAIR_LOCUS;Acc:AT1G09890]		3214237	3217538	-1	1
AT1G09900	4.30328	4.68799	3.5994	4.19689	4.42317	4.66621	4.09942	4.39626	3.82397	4.48745	3.75563	4.02235	0.199372	0.835857	-0.174541	0.861798	Pentatricopeptide repeat (PPR-like) superfamily protein [Source:TAIR_LOCUS;Acc:AT1G09900]		3218133	3219929	1	1
AT1G09910	4.75971	4.80603	3.70836	4.4247	3.91385	4.35015	5.06791	4.44397	4.69991	4.66328	5.04606	4.80308	0.0192694	0.990209	0.37838	0.698225	Rhamnogalacturonate lyase family protein [Source:TAIR_LOCUS;Acc:AT1G09910]	AT1G09910/F21M12_30	3220035	3224541	-1	1	UniProtKB Gene Name
AT1G09920	4.72381	4.97134	5.97765	5.22427	6.06381	5.25858	4.72431	5.3489	5.07883	5.08635	4.76957	4.97825	0.12463	0.937421	-0.246019	0.855317	TRAF-type zinc finger-related [Source:TAIR_LOCUS;Acc:AT1G09920]		3224684	3227070	-1	1
AT1G09932	1.91994	0.972192	1.75979	1.55064	4.68758	3.43726	3.63653	3.92046	4.53287	3.80282	3.87892	4.07154	2.36981	0.000777999	2.5209	0.000488881	Phosphoglycerate mutase family protein [Source:TAIR_LOCUS;Acc:AT1G09932]		3230450	3233109	-1	2
AT1G09940	3.9211	4.24124	4.52695	4.22976	4.3396	4.61417	4.42349	4.45909	5.05943	4.49827	4.8432	4.8003	0.229324	0.745396	0.570538	0.220714	Glutamyl-tRNA reductase family protein [Source:TAIR_LOCUS;Acc:AT1G09940]	HEMA2	3236995	3239554	-1	1	TAIR Gene Name
AT1G09950	-0.344052	1.00224	0.677084	0.445091	1.13108	0.523833	-0.780427	0.291496	1.22927	-1.13436	-2.59398	-0.833022	-0.153595	0.960087	-1.27811	0.418317	RESPONSE TO ABA AND SALT 1 [Source:TAIR_LOCUS;Acc:AT1G09950]	RAS1	3240606	3241632	-1	1	TAIR Gene Name
AT1G09960	1.47784	2.67894	1.69971	1.95216	1.32752	2.63048	1.58355	1.84718	1.56431	2.69292	1.92683	2.06135	-0.104978	0.91724	0.109187	0.913188	sucrose transporter 4 [Source:TAIR_LOCUS;Acc:AT1G09960]	SUT4	3244213	3247200	1	1	TAIR Gene Name
AT1G09970	6.42111	7.43071	8.28627	7.37936	7.48642	7.64012	7.25702	7.46119	7.676	7.91438	7.99493	7.86177	0.0818204	0.953057	0.482403	0.543822	Leucine-rich receptor-like protein kinase family protein [Source:TAIR_LOCUS;Acc:AT1G09970]	LRR XI-23	3252240	3255693	1	2	TAIR Gene Name
AT1G09980	5.27508	5.33378	4.07159	4.89348	3.78834	4.65852	5.15508	4.53398	4.73042	4.97913	5.14944	4.95299	-0.359502	0.739692	0.059511	0.97038	Putative serine esterase family protein [Source:TAIR_LOCUS;Acc:AT1G09980]	AT1G09990	3256245	3261614	-1	2	UniProtKB Gene Name
AT1G09995	2.29097	1.51026	1.16976	1.657	1.41666	1.35407	1.38405	1.38493	1.47946	1.6974	1.5584	1.57842	-0.272069	0.712987	-0.0785753	0.941442	DNA repair DEAD helicase RAD3/XP-D subfamily protein [Source:TAIR_LOCUS;Acc:AT1G09995]		3262265	3263612	-1	1
AT1G10020	3.43861	3.51867	5.55793	4.17173	3.18732	2.49193	4.21867	3.29931	3.2714	2.87503	4.93231	3.69291	-0.872426	0.112365	-0.47882	0.482386	Protein of unknown function (DUF1005) [Source:TAIR_LOCUS;Acc:AT1G10020]	T27I1.4	3269604	3271987	-1	1	UniProtKB Gene Name
AT1G10030	3.611	1.57154	2.1902	2.45758	1.48701	2.09187	2.04	1.87296	1.8856	1.45875	2.17232	1.83889	-0.584619	0.486498	-0.61869	0.448668	homolog of yeast ergosterol28 [Source:TAIR_LOCUS;Acc:AT1G10030]	ERG28	3273825	3275837	1	1	TAIR Gene Name
AT1G10040	0.782382	2.3243	1.73006	1.61225	1.50068	2.45659	1.12255	1.69327	1.86907	3.10152	2.06352	2.3447	0.0810262	0.943928	0.732455	0.164311	alpha/beta-Hydrolases superfamily protein [Source:TAIR_LOCUS;Acc:AT1G10040]	T27I1.6	3275891	3278697	-1	2	UniProtKB Gene Name
AT1G10050	3.99727	4.3889	4.5621	4.31609	4.22373	4.01025	4.49791	4.24396	4.26837	4.43959	4.72788	4.47862	-0.0721274	0.897776	0.162525	0.699303	glycosyl hydrolase family 10 protein / carbohydrate-binding domain-containing protein [Source:TAIR_LOCUS;Acc:AT1G10050]	T27I1.7	3279270	3283482	1	1	UniProtKB Gene Name
AT1G10060	4.50009	4.12296	4.02221	4.21509	3.21709	3.36314	2.56318	3.0478	3.35005	2.87874	2.04603	2.75827	-1.16728	0.0229411	-1.45681	0.00611994	branched-chain amino acid transaminase 1 [Source:TAIR_LOCUS;Acc:AT1G10060]	ATBCAT-1	3284239	3287107	1	3	TAIR Gene Name
AT1G10070	-0.190011	4.65574	-1.2777	1.06268	3.1787	5.51351	3.27585	3.98935	5.7572	6.41151	6.06154	6.07675	2.92668	0.112738	5.01407	0.00715691	branched-chain amino acid transaminase 2 [Source:TAIR_LOCUS;Acc:AT1G10070]	ATBCAT-2	3288087	3290471	1	3	TAIR Gene Name
AT1G10090	6.93453	7.06607	6.70952	6.90337	5.98853	6.62988	7.03979	6.55274	6.5064	6.57179	6.80703	6.62841	-0.35064	0.598556	-0.274967	0.713326	Early-responsive to dehydration stress protein (ERD4) [Source:TAIR_LOCUS;Acc:AT1G10090]	T27I1.11	3290311	3296198	-1	1	UniProtKB Gene Name
AT1G10095	3.09696	2.97439	3.18582	3.08573	3.26268	2.76646	2.76978	2.93297	2.80458	3.04321	2.91691	2.92157	-0.152751	0.883783	-0.164159	0.872492	Protein prenylyltransferase superfamily protein [Source:TAIR_LOCUS;Acc:AT1G10095]	T27I1.12	3297324	3300443	-1	1	UniProtKB Gene Name
AT1G10120	3.79065	3.3553	3.93158	3.69251	3.12141	2.81836	2.96733	2.96903	2.97134	3.19074	3.28753	3.14987	-0.723475	0.214856	-0.542638	0.406778	basic helix-loop-helix (bHLH) DNA-binding superfamily protein [Source:TAIR_LOCUS;Acc:AT1G10120]	BHLH74/AtbHLH74	3304039	3306824	-1	1	UniProtKB Gene Name
AT1G10130	5.92146	5.30517	4.6988	5.30848	4.69219	5.03882	5.50083	5.07728	5.28021	5.41763	5.43389	5.37724	-0.231197	0.811437	0.0687649	0.956651	endoplasmic reticulum-type calcium-transporting ATPase 3 [Source:TAIR_LOCUS;Acc:AT1G10130]	ECA3	3310930	3322213	1	1	TAIR Gene Name
AT1G10140	2.37978	2.49164	3.77675	2.88272	5.02216	3.27153	4.03488	4.10952	5.32438	3.36731	4.74416	4.47862	1.2268	0.140317	1.59589	0.0471915	Uncharacterised conserved protein UCP031279 [Source:TAIR_LOCUS;Acc:AT1G10140]		3322802	3323548	-1	1
AT1G10150	5.814	3.59874	4.26198	4.55824	4.94929	4.50976	5.43194	4.96366	5.29383	3.95236	5.15351	4.7999	0.405422	0.673164	0.241659	0.839433	Carbohydrate-binding protein [Source:TAIR_LOCUS;Acc:AT1G10150]	PP2A10	3325824	3327614	1	1	UniProtKB Gene Name
AT1G10160	2.46924	2.38795	-0.962718	1.29816	0.0360176	1.34115	3.18858	1.52192	2.44866	2.39874	3.11831	2.65523	0.223761	0.954519	1.35708	0.545698	transposable element gene [Source:TAIR_LOCUS;Acc:AT1G10160]		3328971	3333470	1	1
AT1G10170	4.93849	5.62821	4.5113	5.026	4.92983	4.80957	5.91804	5.21915	5.66504	5.618	6.06154	5.78153	0.19315	0.862785	0.755525	0.223976	NF-X-like 1 [Source:TAIR_LOCUS;Acc:AT1G10170]	ATNFXL1	3333595	3337491	-1	1	TAIR Gene Name
AT1G10180	4.24537	4.11279	3.32866	3.89561	3.13037	3.62332	3.89862	3.55077	3.7702	3.89878	3.86408	3.84435	-0.344835	0.642894	-0.0512553	0.96619	BEST Arabidopsis thaliana protein match is: exocyst complex component 84B (TAIR:AT5G49830.1); Has 132 Blast hits to 132 proteins in 25 species: Archae - 0; Bacteria - 0; Metazoa - 7; Fungi - 0; Plants - 117; Viruses - 0; Other Eukaryotes - 8 (source /.../ BLink). [Source:TAIR_LOCUS;Acc:AT1G10180]	AT1G10180	3338303	3341608	-1	1	UniProtKB Gene Name
AT1G10200	6.98925	6.50229	7.35836	6.94997	7.05769	6.5705	6.58728	6.73849	6.50993	6.35787	6.57095	6.47958	-0.211474	0.703603	-0.470382	0.221578	GATA type zinc finger transcription factor family protein [Source:TAIR_LOCUS;Acc:AT1G10200]	WLIM1	3346390	3347885	-1	1	TAIR Gene Name
AT1G10210	4.36675	4.35913	4.09268	4.27285	3.79403	4.20266	4.00251	3.99973	4.17412	4.32399	3.98335	4.16049	-0.273118	0.335077	-0.112366	0.793978	mitogen-activated protein kinase 1 [Source:TAIR_LOCUS;Acc:AT1G10210]	ATMPK1	3349219	3351180	1	2	TAIR Gene Name
AT1G10230	1.73031	2.0298	2.99624	2.25212	2.93981	2.22402	1.92365	2.36249	1.91811	1.78751	1.28741	1.66434	0.110375	0.952081	-0.58777	0.591168	SKP1-like 18 [Source:TAIR_LOCUS;Acc:AT1G10230]	ASK18	3355571	3356359	1	1	TAIR Gene Name
AT1G10240	3.0358	2.83633	1.43121	2.43445	1.47321	2.55455	3.00051	2.34275	2.76964	3.00638	2.89269	2.88957	-0.0916953	0.966717	0.455118	0.769553	FAR1-related sequence 11 [Source:TAIR_LOCUS;Acc:AT1G10240]	FRS11	3356680	3359838	-1	1	TAIR Gene Name
AT1G10270	2.34239	4.35195	1.50309	2.73248	2.39789	3.5501	3.35813	3.10204	2.9675	4.02583	3.32781	3.44038	0.369563	0.804376	0.707904	0.520227	glutamine-rich protein 23 [Source:TAIR_LOCUS;Acc:AT1G10270]	GRP23	3363504	3366488	1	1	TAIR Gene Name
AT1G10280	1.90292	2.86503	1.0069	1.92495	1.003	2.48024	2.42943	1.97089	2.25309	2.68445	2.33234	2.42329	0.0459407	0.976547	0.498344	0.566895	Core-2/I-branching beta-1,6-N-acetylglucosaminyltransferase family protein [Source:TAIR_LOCUS;Acc:AT1G10280]	AT1G10280/F14N23_16	3366493	3369095	-1	1	UniProtKB Gene Name
AT1G10290	5.93199	6.619	5.95015	6.16705	6.19102	6.43601	6.48395	6.37033	6.18791	6.56727	6.60392	6.45303	0.203281	0.778178	0.285985	0.644002	dynamin-like protein 6 [Source:TAIR_LOCUS;Acc:AT1G10290]	ADL6	3370558	3377463	1	1	TAIR Gene Name
AT1G10310	3.88687	4.63815	5.62457	4.71653	5.26551	4.67258	4.25518	4.73109	4.48985	4.47289	4.17389	4.37888	0.0145596	0.994113	-0.337653	0.804608	NAD(P)-binding Rossmann-fold superfamily protein [Source:TAIR_LOCUS;Acc:AT1G10310]		3381601	3383914	-1	1
AT1G10320	4.55698	4.92478	3.81702	4.43292	4.15663	4.33091	4.59874	4.36209	4.44276	4.71259	4.50871	4.55469	-0.0708312	0.952252	0.121766	0.909579	Zinc finger C-x8-C-x5-C-x3-H type family protein [Source:TAIR_LOCUS;Acc:AT1G10320]		3384164	3388373	-1	1
AT1G10330	0.583063	0.828598	-0.233757	0.392635	-0.723679	-0.0293105	0.643665	-0.0364415	0.285682	0.69976	1.0086	0.664682	-0.429076	0.578204	0.272047	0.775865	Tetratricopeptide repeat (TPR)-like superfamily protein [Source:TAIR_LOCUS;Acc:AT1G10330]	PCMP-E71	3388747	3390150	1	1	UniProtKB Gene Name
AT1G10340	2.90511	1.84391	2.13431	2.29444	4.89281	3.87708	4.03488	4.26826	4.90489	4.0506	3.88629	4.28059	1.97382	0.00373286	1.98615	0.00358429	Ankyrin repeat family protein [Source:TAIR_LOCUS;Acc:AT1G10340]		3390322	3392571	-1	2
AT1G10350	4.17087	4.18089	4.5225	4.29142	4.93374	4.01227	4.30412	4.41671	4.34071	4.20561	4.08284	4.20972	0.125293	0.880244	-0.0817009	0.928857	DNAJ heat shock family protein [Source:TAIR_LOCUS;Acc:AT1G10350]		3393407	3395055	-1	1
AT1G10360	5.74401	4.43039	5.71324	5.29588	5.65184	4.73604	5.66215	5.35001	5.29383	4.32399	5.3237	4.98051	0.0541275	0.978869	-0.315377	0.838812	glutathione S-transferase TAU 18 [Source:TAIR_LOCUS;Acc:AT1G10360]	ATGSTU18	3395558	3396849	-1	1	TAIR Gene Name
AT1G10370	4.12205	3.74442	4.14556	4.00401	4.44515	4.41096	4.30412	4.38674	2.8596	2.26292	2.65411	2.59221	0.382732	0.843328	-1.4118	0.198218	Glutathione S-transferase family protein [Source:TAIR_LOCUS;Acc:AT1G10370]	GST30	3397081	3398358	-1	1	TAIR Gene Name
AT1G10380	1.40716	1.86851	1.80329	1.69298	1.11346	1.5576	0.340371	1.00381	1.1762	1.62811	0.639247	1.14785	-0.689175	0.358008	-0.545133	0.515939	Putative membrane lipoprotein [Source:TAIR_LOCUS;Acc:AT1G10380]		3400606	3402324	1	1
AT1G10390	5.95644	6.63375	5.96522	6.18513	6.19982	6.09257	6.4375	6.2433	6.29708	6.53698	6.53293	6.45566	0.0581631	0.947099	0.270529	0.617553	Nucleoporin autopeptidase [Source:TAIR_LOCUS;Acc:AT1G10390]		3407024	3412843	-1	2
AT1G10410	4.96846	5.27447	5.42927	5.22407	6.01302	6.04598	5.60139	5.8868	5.57828	5.77619	5.78887	5.71445	0.66273	0.230484	0.490382	0.433109	Protein of unknown function (DUF1336) [Source:TAIR_LOCUS;Acc:AT1G10410]		3416680	3419639	-1	1
AT1G10417	1.57776	-0.907209	1.48545	0.718667	-0.923478	-0.458897	0.416239	-0.322045	-0.154316	-0.354273	-0.417731	-0.308773	-1.04071	0.237221	-1.02744	0.245338	Encodes protein with unknown function whose expression is repressed by inoculation with Agrobacterium tumerifaciens. [Source:TAIR_LOCUS;Acc:AT1G10417]		3424186	3427457	-1	1
AT1G10430	4.3714	4.57671	4.85079	4.59963	4.76266	4.85397	4.45969	4.69211	4.48322	4.67285	4.56938	4.57515	0.0924727	0.86073	-0.0244821	0.970112	protein phosphatase 2A-2 [Source:TAIR_LOCUS;Acc:AT1G10430]	PP2A-2	3428478	3430633	-1	1	TAIR Gene Name
AT1G10450	5.413	5.233	4.20216	4.94939	4.80165	4.82681	5.07959	4.90268	5.06475	5.15992	5.14434	5.123	-0.0467042	0.961887	0.173615	0.81551	SIN3-like 6 [Source:TAIR_LOCUS;Acc:AT1G10450]	SNL6	3431780	3438370	1	1	TAIR Gene Name
AT1G10470	6.57851	6.1517	7.82171	6.85064	7.37934	5.87451	7.08724	6.78036	6.60942	5.44573	7.1408	6.39865	-0.0702802	0.951919	-0.451994	0.472368	response regulator 4 [Source:TAIR_LOCUS;Acc:AT1G10470]	ARR4	3442327	3443957	-1	1	TAIR Gene Name
AT1G10490	5.35785	5.02547	4.56644	4.98325	4.94929	4.81649	4.75254	4.83944	4.74155	4.91252	4.90603	4.85337	-0.143811	0.848264	-0.129883	0.867	Domain of unknown function (DUF1726) ;Putative ATPase (DUF699) [Source:TAIR_LOCUS;Acc:AT1G10490]		3453228	3460620	1	1
AT1G10500	6.6185	6.74876	6.5841	6.65045	6.28446	6.86467	6.71363	6.62092	6.54168	6.64995	6.63252	6.60805	-0.0295325	0.965331	-0.042402	0.949045	chloroplast-localized ISCA-like protein [Source:TAIR_LOCUS;Acc:AT1G10500]	ATCPISCA	3460000	3461485	-1	1	TAIR Gene Name
AT1G10510	5.93723	5.40047	5.9066	5.7481	5.59164	5.30761	5.46346	5.45424	5.0945	5.28629	5.10709	5.16263	-0.293865	0.517962	-0.585476	0.0982465	RNI-like superfamily protein [Source:TAIR_LOCUS;Acc:AT1G10510]	emb2004	3461635	3465786	1	1	TAIR Gene Name
AT1G10522	4.33695	4.94492	4.86322	4.71503	5.71349	5.29941	4.44622	5.15304	4.39265	4.94358	3.72034	4.35219	0.438013	0.692444	-0.36284	0.762552	unknown protein; FUNCTIONS IN: molecular_function unknown; INVOLVED IN: biological_process unknown; LOCATED IN: chloroplast; EXPRESSED IN: 23 plant structures; EXPRESSED DURING: 13 growth stages; Has 24 Blast hits to 24 proteins in 8 species: Archae /.../Bacteria - 0; Metazoa - 0; Fungi - 0; Plants - 24; Viruses - 0; Other Eukaryotes - 0 (source: NCBI BLink). [Source:TAIR_LOCUS;Acc:AT1G10522]		3469580	3471488	1	2
AT1G10540	-3.0345	-2.66301	-5.99094	-3.89615	-2.84821	0.404241	0.488312	-0.651886	-0.459698	0.798073	0.465392	0.267922	3.24427	0.0323595	4.16408	0.00767703	nucleobase-ascorbate transporter 8 [Source:TAIR_LOCUS;Acc:AT1G10540]	ATNAT8	3474864	3477927	-1	1	TAIR Gene Name
AT1G10560	1.97799	2.02251	2.75623	2.25224	1.11346	1.99648	2.52947	1.8798	2.49229	1.24364	1.74356	1.82649	-0.372443	0.808096	-0.425749	0.768101	plant U-box 18 [Source:TAIR_LOCUS;Acc:AT1G10560]	PUB18	3484580	3486965	1	1	TAIR Gene Name
AT1G10570	5.22287	4.76127	4.76453	4.91622	4.41576	4.36126	4.75254	4.50985	4.72818	4.81027	4.85324	4.79723	-0.406371	0.219223	-0.118994	0.834762	Cysteine proteinases superfamily protein [Source:TAIR_LOCUS;Acc:AT1G10570]	OTS2	3487584	3491277	1	2	TAIR Gene Name
AT1G10580	4.72985	5.38304	4.75695	4.95661	4.96975	5.3762	5.08924	5.14507	5.01983	5.45988	5.3255	5.26841	0.188454	0.629061	0.311792	0.308207	Transducin/WD40 repeat-like superfamily protein [Source:TAIR_LOCUS;Acc:AT1G10580]		3491281	3493737	-1	1
AT1G10585	0.924117	-0.907209	1.14758	0.388162	1.41666	1.89429	0.94619	1.41905	2.88836	1.60124	3.02336	2.50432	1.03089	0.505614	2.11616	0.0804008	basic helix-loop-helix (bHLH) DNA-binding superfamily protein [Source:TAIR_LOCUS;Acc:AT1G10585]	AT1G10585	3493940	3495144	-1	1	UniProtKB Gene Name
AT1G10590	6.21755	5.94961	7.10824	6.42513	6.99891	6.26515	6.35354	6.5392	6.20709	5.99821	6.51176	6.23902	0.114065	0.929312	-0.186114	0.8713	Nucleic acid-binding, OB-fold-like protein [Source:TAIR_LOCUS;Acc:AT1G10590]		3502004	3503457	-1	3
AT1G10600	4.81878	4.52021	4.17978	4.50626	4.23636	4.27997	4.87373	4.46336	4.70902	4.50782	4.79193	4.66959	-0.0429009	0.969663	0.163332	0.856379	associated molecule with the SH3 domain of STAM 2 [Source:TAIR_LOCUS;Acc:AT1G10600]	AMSH2	3503704	3505502	1	3	TAIR Gene Name
AT1G10610	3.99325	4.00142	4.43282	4.1425	4.61007	3.58853	3.98606	4.06155	3.83658	3.78717	4.12287	3.91554	-0.0809465	0.93587	-0.226956	0.762194	basic helix-loop-helix (bHLH) DNA-binding superfamily protein [Source:TAIR_LOCUS;Acc:AT1G10610]	BHLH90/AtbHLH90	3506186	3509006	1	1	UniProtKB Gene Name
AT1G10630	5.67298	5.37247	6.55767	5.86771	6.38778	5.85791	5.60543	5.95037	5.6088	5.43081	5.77905	5.60622	0.0826663	0.953501	-0.26149	0.809236	ADP-ribosylation factor A1F [Source:TAIR_LOCUS;Acc:AT1G10630]	ATARFA1F	3512795	3514729	-1	1	TAIR Gene Name
AT1G10650	3.56303	4.12633	2.35595	3.34844	2.78426	4.41705	2.88087	3.36073	2.52416	4.32534	2.84803	3.23251	0.0122898	0.991487	-0.115928	0.90535	SBP (S-ribonuclease binding protein) family protein [Source:TAIR_LOCUS;Acc:AT1G10650]	AT1G10650	3524018	3526346	-1	2	UniProtKB Gene Name
AT1G10657	5.09097	1.57154	4.25665	3.63972	3.63847	2.08416	3.12983	2.95082	3.20128	1.35522	1.81763	2.12471	-0.688896	0.466925	-1.51501	0.0449712	Plant protein 1589 of unknown function [Source:TAIR_LOCUS;Acc:AT1G10657]		3530467	3531842	1	4
AT1G10660	4.71041	4.75259	3.83852	4.43384	4.15219	4.80494	4.88042	4.61252	5.12958	5.07438	5.29639	5.16678	0.178676	0.853196	0.73294	0.166644	unknown protein; LOCATED IN: endomembrane system; EXPRESSED IN: 24 plant structures; EXPRESSED DURING: 15 growth stages; BEST Arabidopsis thaliana protein match is: unknown protein (TAIR:AT5G62960.1); Has 35333 Blast hits to 34131 proteins in 2444 s /.../: Archae - 798; Bacteria - 22429; Metazoa - 974; Fungi - 991; Plants - 531; Viruses - 0; Other Eukaryotes - 9610 (source: NCBI BLink). [Source:T…	AT1G10660	3532424	3535131	1	4	UniProtKB Gene Name
AT1G10670	7.42443	6.83344	7.96556	7.40781	7.3384	6.86274	7.08338	7.09484	6.75311	6.45864	6.93644	6.71606	-0.312967	0.516724	-0.691745	0.0627636	ATP-citrate lyase A-1 [Source:TAIR_LOCUS;Acc:AT1G10670]	ACLA-1	3535383	3538439	1	4	TAIR Gene Name
AT1G10682	4.63766	2.05143	4.78704	3.82538	4.31992	1.92053	3.27246	3.17097	4.00977	2.3188	4.49434	3.60764	-0.654408	0.465558	-0.217743	0.878665	other RNA [Source:TAIR_LOCUS;Acc:AT1G10682]		3544991	3545471	-1	1
AT1G10690	0.889967	2.02251	0.0284154	0.980299	2.05942	2.53209	2.35438	2.3153	2.90052	2.67593	2.06352	2.54666	1.335	0.0754521	1.56636	0.0357239	unknown protein; BEST Arabidopsis thaliana protein match is: unknown protein (TAIR:AT1G60783.1); Has 59 Blast hits to 59 proteins in 9 species: Archae - 0; Bacteria - 0; Metazoa - 0; Fungi - 0; Plants - 59; Viruses - 0; Other Eukaryotes - 0 (source: /.../BLink). [Source:TAIR_LOCUS;Acc:AT1G10690]	T16B5.17	3549992	3550632	-1	1	UniProtKB Gene Name
AT1G10700	4.6117	2.52803	4.61957	3.91977	4.31992	3.03714	4.62155	3.99287	5.06475	3.98358	5.08064	4.70966	0.0731019	0.961002	0.789887	0.256517	phosphoribosyl pyrophosphate (PRPP) synthase 3 [Source:TAIR_LOCUS;Acc:AT1G10700]	PRS3	3554104	3556503	1	1	TAIR Gene Name
AT1G10720	4.54331	4.64051	5.177	4.78694	4.95571	4.48822	4.53089	4.65828	4.46986	4.68447	4.63635	4.59689	-0.128662	0.882834	-0.190046	0.805132	BSD domain-containing protein [Source:TAIR_LOCUS;Acc:AT1G10720]	T16B5.14	3562952	3564759	1	1	UniProtKB Gene Name
AT1G10730	3.07052	3.70202	2.57395	3.1155	2.67867	3.66244	3.29268	3.21126	3.44402	3.9006	3.24992	3.53151	0.095766	0.910511	0.416014	0.381103	Clathrin adaptor complexes medium subunit family protein [Source:TAIR_LOCUS;Acc:AT1G10730]	T16B5.13	3565463	3567779	1	1	UniProtKB Gene Name
AT1G10740	4.51697	2.66501	3.99048	3.72416	4.05102	3.17003	4.57143	3.93083	4.09081	3.00298	4.09136	3.72838	0.206674	0.772739	0.00422896	0.996945	alpha/beta-Hydrolases superfamily protein [Source:TAIR_LOCUS;Acc:AT1G10740]	T16B5.12	3567905	3570838	-1	4	UniProtKB Gene Name
AT1G10760	10.549	11.4046	10.0488	10.6675	9.58378	10.6272	11.0906	10.4339	10.0127	10.796	10.3429	10.3839	-0.233582	0.87789	-0.283585	0.843219	Pyruvate phosphate dikinase, PEP/pyruvate binding domain [Source:TAIR_LOCUS;Acc:AT1G10760]	GWD1/SEX1	3581034	3590928	-1	1	TAIR Gene Name
AT1G10770	-0.879116	0.308446	1.58825	0.339193	1.32752	0.453281	0.287479	0.689428	0.0382501	-0.038011	-0.234786	-0.0781823	0.350235	0.885637	-0.417375	0.85693	Plant invertase/pectin methylesterase inhibitor superfamily protein [Source:TAIR_LOCUS;Acc:AT1G10770]	T16B5.9	3591633	3592411	-1	1	UniProtKB Gene Name
AT1G10820	4.81537	4.80393	4.08969	4.56966	4.22161	4.50833	4.19917	4.3097	4.29896	4.55579	4.02397	4.29291	-0.259957	0.502449	-0.276752	0.461387	Protein of unknown function (DUF3755) [Source:TAIR_LOCUS;Acc:AT1G10820]	AT1G10820/T16B5_4	3600910	3605076	-1	2	UniProtKB Gene Name
AT1G10830	5.0197	4.3945	5.50758	4.97393	4.85894	4.20089	4.71186	4.59056	4.35968	4.03082	4.53859	4.3097	-0.383366	0.380316	-0.664233	0.0746041	15-cis-zeta-carotene isomerase [Source:TAIR_LOCUS;Acc:AT1G10830]	Z-ISO	3605576	3607493	-1	2	TAIR Gene Name
AT1G10840	6.39204	6.17613	6.06343	6.21054	6.36397	6.2521	6.34309	6.31972	6.47484	6.37382	6.45004	6.4329	0.109186	0.806719	0.222362	0.486445	translation initiation factor 3 subunit H1 [Source:TAIR_LOCUS;Acc:AT1G10840]	TIF3H1	3607631	3610520	-1	2	TAIR Gene Name
AT1G10850	1.99416	1.22234	2.38504	1.86718	0.819891	1.17627	1.3328	1.10965	1.26781	0.630258	1.14655	1.01487	-0.757528	0.0369909	-0.852307	0.0196427	Leucine-rich repeat protein kinase family protein [Source:TAIR_LOCUS;Acc:AT1G10850]	AT1G10850	3611747	3614613	1	1	UniProtKB Gene Name
AT1G10865	3.84515	4.42766	4.59218	4.28833	5.16455	4.63521	4.31733	4.7057	4.71468	4.7422	4.4553	4.63739	0.417367	0.45815	0.34906	0.571083	FUNCTIONS IN: molecular_function unknown; INVOLVED IN: biological_process unknown; LOCATED IN: cellular_component unknown; CONTAINS InterPro DOMAIN/s: Cytochrome c oxidase assembly protein PET191, N-terminal (InterPro:IPR018793); Has 241 Blast hits /.../ proteins in 124 species: Archae - 0; Bacteria - 0; Metazoa - 100; Fungi - 94; Plants - 38; Viruses - 0; Other Eukaryotes - 9 (source: NCBI BLink…		3614513	3616159	-1	2
AT1G10870	4.51697	4.77313	3.99369	4.42793	3.37648	4.12094	4.04881	3.84874	4.07142	4.2632	4.09772	4.14411	-0.579187	0.168667	-0.283816	0.620978	ARF-GAP domain 4 [Source:TAIR_LOCUS;Acc:AT1G10870]	AGD4	3616610	3623758	-1	1	TAIR Gene Name
AT1G10890	5.77242	6.15129	6.3826	6.1021	6.64923	6.17433	5.79371	6.20576	5.85854	6.31401	5.75519	5.97591	0.103654	0.910983	-0.126187	0.886516	unknown protein; FUNCTIONS IN: molecular_function unknown; INVOLVED IN: biological_process unknown; LOCATED IN: chloroplast; EXPRESSED IN: petal, flower, leaf; EXPRESSED DURING: LP.04 four leaves visible, 4 anthesis, petal differentiation and expans /.../age; BEST Arabidopsis thaliana protein match is: unknown protein (TAIR:AT5G13340.1); Has 11769 Blast hits to 8435 proteins in 698 species: Archa…	AT1G10890	3627726	3630765	1	1	UniProtKB Gene Name
AT1G10900	6.62889	5.62703	5.68327	5.97973	5.70583	5.08726	6.44353	5.74554	6.03831	5.45866	5.88663	5.79453	-0.234189	0.70318	-0.185198	0.785742	Phosphatidylinositol-4-phosphate 5-kinase family protein [Source:TAIR_LOCUS;Acc:AT1G10900]	PIP5K7	3632234	3637141	-1	1	UniProtKB Gene Name
AT1G10910	5.67611	5.26688	5.56341	5.50214	5.18443	4.61814	5.28427	5.02894	5.01983	4.90802	5.01511	4.98099	-0.473193	0.552111	-0.521149	0.491584	Pentatricopeptide repeat (PPR) superfamily protein [Source:TAIR_LOCUS;Acc:AT1G10910]		3639878	3644162	1	1
AT1G10920	4.82331	4.79338	4.51579	4.71083	4.46681	4.16147	4.72182	4.45004	4.56211	4.65686	4.36513	4.52803	-0.260791	0.538392	-0.182795	0.716407	NB-ARC domain-containing disease resistance protein [Source:TAIR_LOCUS;Acc:AT1G10920]	LOV1	3644420	3647768	-1	2	TAIR Gene Name
AT1G10930	5.04999	4.18413	4.3797	4.53794	3.54395	3.45223	4.29747	3.76455	3.61519	3.47644	3.95093	3.68085	-0.773386	0.268211	-0.857084	0.204416	DNA helicase (RECQl4A) [Source:TAIR_LOCUS;Acc:AT1G10930]	ATSGS1	3647894	3655590	-1	1	TAIR Gene Name
AT1G10940	6.74003	6.79014	7.16547	6.89855	7.08637	6.57894	6.6722	6.77917	6.50736	6.64648	6.66979	6.60788	-0.119376	0.870696	-0.290668	0.566232	Protein kinase superfamily protein [Source:TAIR_LOCUS;Acc:AT1G10940]	ASK1	3655777	3658608	-1	2	TAIR Gene Name
AT1G10950	6.75641	6.64544	6.69947	6.70044	6.54353	6.43824	6.7919	6.59123	6.55075	6.61565	6.91362	6.69334	-0.109216	0.801567	-0.00709997	0.990772	transmembrane nine 1 [Source:TAIR_LOCUS;Acc:AT1G10950]	TMN1	3659209	3663984	1	1	TAIR Gene Name
AT1G10960	4.81309	6.40687	6.60253	5.94083	6.47297	6.7336	6.19816	6.46824	5.74737	6.38703	5.82623	5.98688	0.52741	0.496959	0.0460443	0.975082	ferredoxin 1 [Source:TAIR_LOCUS;Acc:AT1G10960]	ATFD1	3664386	3665039	1	1	TAIR Gene Name
AT1G10970	1.9534	2.93242	1.83159	2.23913	3.19589	2.98446	2.78415	2.98817	2.85127	3.38304	2.86307	3.03246	0.749032	0.0770901	0.793328	0.0599568	zinc transporter 4 precursor [Source:TAIR_LOCUS;Acc:AT1G10970]	ZIP4	3665087	3667139	-1	1	TAIR Gene Name
AT1G10990	-2.10157	-0.473514	0.931148	-0.547979	1.04075	0.794861	-0.960807	0.291601	2.39793	2.69292	2.26593	2.45226	0.83958	0.651194	3.00023	0.0182594	unknown protein; Has 4 Blast hits to 4 proteins in 1 species: Archae - 0; Bacteria - 0; Metazoa - 0; Fungi - 0; Plants - 4; Viruses - 0; Other Eukaryotes - 0 (source: NCBI BLink). [Source:TAIR_LOCUS;Acc:AT1G10990]	T19D16.27	3670278	3671187	-1	2	UniProtKB Gene Name
AT1G11000	1.54521	0.0731437	1.53775	1.05204	1.59297	-0.0984452	0.0853854	0.526636	0.808127	-0.251859	0.61566	0.390643	-0.525401	0.675648	-0.661394	0.554826	Seven transmembrane MLO family protein [Source:TAIR_LOCUS;Acc:AT1G11000]	MLO4	3671756	3675979	-1	1	TAIR Gene Name
AT1G11020	3.99727	3.80048	4.41613	4.07129	3.85517	3.61802	3.86751	3.78023	3.80485	3.94181	4.04606	3.9309	-0.291061	0.392341	-0.140389	0.770695	RING/FYVE/PHD zinc finger superfamily protein [Source:TAIR_LOCUS;Acc:AT1G11020]	AT1G11020/T19D16_25	3676691	3678524	1	1	UniProtKB Gene Name
AT1G11050	3.83845	4.75476	4.07462	4.22261	4.10018	4.25636	4.60683	4.32113	5.60456	5.19349	5.1248	5.30762	0.0985143	0.944996	1.08501	0.0847214	Protein kinase superfamily protein [Source:TAIR_LOCUS;Acc:AT1G11050]		3681888	3684169	1	1
AT1G11060	4.15118	4.05199	3.25634	3.81984	3.27891	3.74249	3.84029	3.62056	3.99112	4.13946	4.15776	4.09611	-0.199272	0.777471	0.276275	0.649842	WAPL (Wings apart-like protein regulation of heterochromatin) protein [Source:TAIR_LOCUS;Acc:AT1G11060]	T19D16.5	3684568	3689847	1	1	UniProtKB Gene Name
AT1G11070	1.60959	-2.86833	0.823632	-0.145036	-0.441475	-2.0346	0.534434	-0.647215	0.335289	-3.86347	-0.572031	-1.36674	-0.502178	0.627614	-1.2217	0.0945355	BEST Arabidopsis thaliana protein match is: Hydroxyproline-rich glycoprotein family protein (TAIR:AT1G61080.1); Has 579 Blast hits to 567 proteins in 152 species: Archae - 0; Bacteria - 68; Metazoa - 159; Fungi - 113; Plants - 172; Viruses - 0; Othe /.../ryotes - 67 (source: NCBI BLink). [Source:TAIR_LOCUS;Acc:AT1G11070]	AT1G11070	3690212	3693648	-1	1	UniProtKB Gene Name
AT1G11090	3.49081	4.51893	3.95148	3.98707	3.77403	4.31956	3.81022	3.96794	3.41619	4.06201	3.62373	3.70064	-0.0191368	0.982652	-0.28643	0.562673	alpha/beta-Hydrolases superfamily protein [Source:TAIR_LOCUS;Acc:AT1G11090]	T19D16.3	3702608	3703779	1	1	UniProtKB Gene Name
AT1G11130	3.8496	4.1297	3.07024	3.68318	2.9849	3.74492	3.63916	3.45633	2.872	3.43428	2.35382	2.8867	-0.226853	0.899599	-0.796481	0.463077	Leucine-rich repeat protein kinase family protein [Source:TAIR_LOCUS;Acc:AT1G11130]	SUB	3722857	3727450	1	1	TAIR Gene Name
AT1G11150	2.56974	3.62288	1.43121	2.54128	1.78432	2.91252	2.97986	2.5589	2.62552	3.2144	2.54638	2.79543	0.0176211	0.995129	0.254155	0.917671	transposable element gene [Source:TAIR_LOCUS;Acc:AT1G11150]		3728971	3731624	1	1
AT1G11170	2.69371	4.16785	2.61555	3.15903	2.7499	4.12653	3.54676	3.4744	3.00173	3.69788	2.73266	3.14409	0.315365	0.762154	-0.0149446	0.99221	Protein of unknown function (DUF707) [Source:TAIR_LOCUS;Acc:AT1G11170]	T28P6.16	3740765	3744675	1	2	UniProtKB Gene Name
AT1G11175	3.96892	4.7106	5.05509	4.5782	5.4144	4.59281	4.785	4.93073	5.03707	4.6287	4.6436	4.76979	0.352531	0.579171	0.191585	0.819151	other RNA [Source:TAIR_LOCUS;Acc:AT1G11175]		3744858	3745655	1	1
AT1G11180	3.9566	3.74662	3.84208	3.84843	3.9372	3.66501	4.14275	3.91498	3.99299	3.69159	3.82883	3.8378	0.0665541	0.939681	-0.0106267	0.991202	Secretory carrier membrane protein (SCAMP) family protein [Source:TAIR_LOCUS;Acc:AT1G11180]	SCAMP5	3745774	3748521	1	2	UniProtKB Gene Name
AT1G11190	0.782382	-1.93011	0.76676	-0.126989	-0.00149531	5.4169	1.18168	2.19903	0.0382501	0.480246	1.5707	0.696398	2.32602	0.364943	0.823388	0.841079	bifunctional nuclease i [Source:TAIR_LOCUS;Acc:AT1G11190]	BFN1	3750066	3752780	-1	1	TAIR Gene Name
AT1G11200	4.4873	3.77703	4.15991	4.14141	3.94745	4.04614	4.02081	4.0048	4.05716	3.98529	4.4879	4.17678	-0.136614	0.806127	0.0353703	0.961994	Protein of unknown function (DUF300) [Source:TAIR_LOCUS;Acc:AT1G11200]		3753365	3755641	1	1
AT1G11210	5.61274	6.64048	5.95099	6.06807	7.65142	6.6276	6.57978	6.95293	6.88488	6.61045	6.00706	6.50079	0.884863	0.277935	0.432724	0.705374	Protein of unknown function (DUF761) [Source:TAIR_LOCUS;Acc:AT1G11210]	T28P6.13	3755677	3756998	-1	1	UniProtKB Gene Name
AT1G11220	-0.879116	1.69596	0.823632	0.546824	2.16684	2.88624	0.391391	1.81483	1.66372	2.46458	0.662453	1.59692	1.268	0.182847	1.0501	0.300261	Protein of unknown function (DUF761) [Source:TAIR_LOCUS;Acc:AT1G11220]	T28P6.12	3759862	3761165	-1	1	UniProtKB Gene Name
AT1G11240	4.10355	4.40703	6.35861	4.95639	6.46567	4.77919	4.23617	5.16034	4.57588	4.4258	4.23475	4.41214	0.203951	0.941875	-0.544253	0.801906	CONTAINS InterPro DOMAIN/s: Nucleolar protein 12 (InterPro:IPR019186); Has 2484 Blast hits to 1934 proteins in 262 species: Archae - 0; Bacteria - 90; Metazoa - 921; Fungi - 378; Plants - 144; Viruses - 18; Other Eukaryotes - 933 (source: NCBI BLink). [Source:TAIR_LOCUS;Acc:AT1G11240]		3766754	3768294	-1	1
AT1G11260	6.77642	4.87865	8.83566	6.83024	7.89715	5.16333	7.97474	7.01174	8.05438	4.97484	7.87391	6.96771	0.181498	0.928881	0.137468	0.94878	sugar transporter 1 [Source:TAIR_LOCUS;Acc:AT1G11260]	STP1	3777328	3780337	1	1	TAIR Gene Name
AT1G11270	1.90292	2.31837	1.57161	1.93097	1.41666	2.13728	1.86175	1.80523	1.98864	2.20477	1.402	1.86514	-0.125734	0.892423	-0.0658289	0.950169	F-box and associated interaction domains-containing protein [Source:TAIR_LOCUS;Acc:AT1G11270]		3780429	3786990	-1	3
AT1G11280	5.17315	4.40286	4.83826	4.80476	4.36094	3.93355	4.28575	4.19341	4.03184	3.8563	4.15978	4.01597	-0.611343	0.184475	-0.788785	0.0724868	S-locus lectin protein kinase family protein [Source:TAIR_LOCUS;Acc:AT1G11280]		3787334	3790876	-1	4
AT1G11290	3.07813	2.59326	2.53113	2.73417	2.67867	2.22402	2.95891	2.62053	2.71556	2.4295	2.75971	2.63492	-0.113639	0.886742	-0.0992474	0.904116	Pentatricopeptide repeat (PPR) superfamily protein [Source:TAIR_LOCUS;Acc:AT1G11290]	CRR22	3791454	3793883	-1	1	TAIR Gene Name
AT1G11300	4.39746	4.40425	3.34371	4.04847	3.73022	4.13396	3.65487	3.83968	3.95113	4.72389	3.39482	4.02328	-0.20879	0.766861	-0.0251921	0.980498	protein serine/threonine kinases;protein kinases;ATP binding;sugar binding;kinases;carbohydrate binding [Source:TAIR_LOCUS;Acc:AT1G11300]		3794238	3800719	1	1
AT1G11310	8.38013	7.86877	7.43845	7.89578	7.2817	7.71722	7.85897	7.6193	7.87881	8.0105	7.81894	7.90275	-0.276487	0.762556	0.00696771	0.996143	Seven transmembrane MLO family protein [Source:TAIR_LOCUS;Acc:AT1G11310]	MLO2	3800738	3804185	-1	2	TAIR Gene Name
AT1G11320	2.45178	2.06567	1.9654	2.16095	1.56719	1.5351	1.59447	1.56559	1.30534	1.45875	1.36009	1.37473	-0.595364	0.164697	-0.786224	0.0554905	unknown protein; FUNCTIONS IN: molecular_function unknown; INVOLVED IN: biological_process unknown; LOCATED IN: mitochondrion, plastid; EXPRESSED IN: 7 plant structures; EXPRESSED DURING: C globular stage, F mature embryo stage, petal differentiatio /.../expansion stage, E expanded cotyledon stage, D bilateral stage; Has 46 Blast hits to 46 proteins in 14 species: Archae - 0; Bacteria - 2; Metazo…	T28P6.3	3807128	3808875	1	1	UniProtKB Gene Name
AT1G11330	5.84218	4.5853	5.09636	5.17461	4.36671	4.94201	3.71104	4.33992	4.62004	5.24207	4.67649	4.8462	-0.834693	0.305833	-0.328414	0.794559	S-locus lectin protein kinase family protein [Source:TAIR_LOCUS;Acc:AT1G11330]		3810093	3813607	1	2
AT1G11340	1.50065	1.19661	1.07893	1.25873	-0.120176	0.655308	-0.344791	0.0634471	1.24223	0.69976	0.107578	0.683189	-1.19528	0.0495392	-0.575539	0.441933	S-locus lectin protein kinase family protein [Source:TAIR_LOCUS;Acc:AT1G11340]	RKS1	3814116	3817420	-1	1	UniProtKB Gene Name
AT1G11350	5.98807	6.52843	5.30268	5.93972	5.41721	5.56153	5.86398	5.61424	6.43108	6.28504	6.69505	6.47039	-0.325487	0.800849	0.530662	0.607401	S-domain-1 13 [Source:TAIR_LOCUS;Acc:AT1G11350]	CBRLK1	3817591	3820805	-1	1	TAIR Gene Name
AT1G11360	4.64024	4.62512	5.31831	4.86122	4.91408	4.56976	4.90906	4.79763	4.66405	4.60555	4.83309	4.7009	-0.0635884	0.919322	-0.160323	0.731214	Adenine nucleotide alpha hydrolases-like superfamily protein [Source:TAIR_LOCUS;Acc:AT1G11360]		3821443	3823088	-1	4
AT1G11380	2.56974	2.25769	4.15419	2.99388	2.79553	1.97995	2.69066	2.48871	2.46518	1.87976	3.07162	2.47219	-0.505162	0.555269	-0.52169	0.536123	PLAC8 family protein [Source:TAIR_LOCUS;Acc:AT1G11380]		3832623	3834191	1	1
AT1G11390	3.58988	4.05199	3.08817	3.57668	2.73242	3.79972	3.35172	3.29462	3.09622	3.80477	3.50107	3.46736	-0.28206	0.673359	-0.109323	0.906933	Protein kinase superfamily protein [Source:TAIR_LOCUS;Acc:AT1G11390]		3834459	3837629	-1	1
AT1G11400	3.59519	3.69749	4.54243	3.94503	4.41205	3.93355	3.49534	3.94698	3.71431	3.60043	3.58802	3.63425	0.00194388	0.998888	-0.310785	0.741472	partner of Y14-MAGO [Source:TAIR_LOCUS;Acc:AT1G11400]	PYM	3837821	3840207	1	3	TAIR Gene Name
AT1G11410	4.99682	5.64293	3.94156	4.86043	3.76826	4.70279	4.74401	4.40502	4.36258	4.67179	3.91057	4.31498	-0.455414	0.618965	-0.545454	0.513348	S-locus lectin protein kinase family protein [Source:TAIR_LOCUS;Acc:AT1G11410]		3841286	3844432	1	1
AT1G11430	6.66973	6.45886	7.38417	6.83759	7.38934	6.73451	6.41005	6.84463	6.25125	6.41748	6.11507	6.26127	0.0070461	0.996614	-0.576322	0.44976	plastid developmental protein DAG, putative [Source:TAIR_LOCUS;Acc:AT1G11430]	AT1G11430/T23J18_10	3847243	3849162	1	1	UniProtKB Gene Name
AT1G11440	4.24029	3.4927	5.36922	4.3674	4.48462	4.18132	4.36265	4.34286	4.09081	3.73916	4.13939	3.98979	-0.0245405	0.985336	-0.377615	0.637817	BEST Arabidopsis thaliana protein match is: glycine-rich protein (TAIR:AT3G29075.1); Has 19337 Blast hits to 8589 proteins in 488 species: Archae - 26; Bacteria - 641; Metazoa - 7852; Fungi - 2167; Plants - 955; Viruses - 616; Other Eukaryotes - 708 /.../rce: NCBI BLink). [Source:TAIR_LOCUS;Acc:AT1G11440]	AT1G11440/T23J18_11	3849360	3850662	1	1	UniProtKB Gene Name
AT1G11475	4.99179	4.62987	4.41613	4.67926	5.02828	4.88612	4.48626	4.80022	4.25283	4.60999	4.74146	4.53476	0.120953	0.854907	-0.144504	0.816909	RNA polymerases N / 8 kDa subunit [Source:TAIR_LOCUS;Acc:AT1G11475]	NRPB10	3862399	3864030	1	1	TAIR Gene Name
AT1G11480	5.17492	5.68334	5.89442	5.58422	6.28342	5.71398	5.87127	5.95622	6.00348	5.85826	5.81346	5.89173	0.371998	0.487733	0.307509	0.602558	eukaryotic translation initiation factor-related [Source:TAIR_LOCUS;Acc:AT1G11480]		3864153	3866969	-1	2
AT1G11530	5.90124	5.74244	6.64502	6.09623	6.32072	5.60468	5.90006	5.94182	5.66039	5.44139	5.82241	5.6414	-0.154411	0.872879	-0.454835	0.454119	C-terminal cysteine residue is changed to a serine 1 [Source:TAIR_LOCUS;Acc:AT1G11530]	ATCXXS1	3874437	3875484	1	1	TAIR Gene Name
AT1G11545	1.57776	1.73217	2.33623	1.88205	0.94447	1.48902	1.23849	1.22399	-0.189099	-0.909081	0.438748	-0.219811	-0.65806	0.738562	-2.10186	0.0887573	xyloglucan endotransglucosylase/hydrolase 8 [Source:TAIR_LOCUS;Acc:AT1G11545]	XTH8	3878550	3880361	-1	1	TAIR Gene Name
AT1G11580	3.47362	3.13773	5.07358	3.89498	4.99245	5.39554	4.3288	4.9056	4.37124	4.21439	4.95696	4.5142	1.01062	0.218498	0.619221	0.543225	methylesterase PCR A [Source:TAIR_LOCUS;Acc:AT1G11580]	ATPMEPCRA	3888690	3890811	1	1	TAIR Gene Name
AT1G11592	2.07238	3.54417	2.1681	2.59488	1.95351	3.1221	2.51231	2.52931	2.55018	3.5456	2.86805	2.98794	-0.0655772	0.922511	0.393062	0.24608	other RNA [Source:TAIR_LOCUS;Acc:AT1G11592]		3895179	3896934	-1	2
AT1G11630	3.38137	3.53911	4.40166	3.77405	4.23006	3.51061	3.42989	3.72352	3.41338	3.52921	3.53898	3.49386	-0.0505289	0.972711	-0.28019	0.79139	Tetratricopeptide repeat (TPR)-like superfamily protein [Source:TAIR_LOCUS;Acc:AT1G11630]		3912902	3914407	-1	1
AT1G11650	7.38914	8.08707	8.08913	7.85511	8.39085	8.06539	7.97136	8.14253	8.03203	8.04469	8.1512	8.07598	0.28742	0.564749	0.220865	0.697352	RNA-binding (RRM/RBD/RNP motifs) family protein [Source:TAIR_LOCUS;Acc:AT1G11650]	ATRBP45B	3914774	3918176	1	2	TAIR Gene Name
AT1G11660	5.39104	4.99268	5.02692	5.13688	5.14777	4.80146	5.23554	5.06159	5.15221	5.02713	5.23442	5.13792	-0.0752926	0.905178	0.00103883	0.998884	heat shock protein 70 (Hsp 70) family protein [Source:TAIR_LOCUS;Acc:AT1G11660]	HSP70-16	3920543	3924555	1	1	UniProtKB Gene Name
AT1G11670	0.800879	0.308446	1.48545	0.864926	0.983746	0.756355	-0.724991	0.33837	0.539355	0.630258	-0.0725007	0.365704	-0.526556	0.663591	-0.499221	0.688248	MATE efflux family protein [Source:TAIR_LOCUS;Acc:AT1G11670]	F25C20.18	3928162	3931576	-1	1	UniProtKB Gene Name
AT1G11680	6.09031	5.91176	5.65267	5.88491	5.87468	5.62578	6.12968	5.87671	5.86057	5.93193	6.21213	6.00154	-0.00820222	0.992198	0.116626	0.856584	CYTOCHROME P450 51G1 [Source:TAIR_LOCUS;Acc:AT1G11680]	CYP51G1	3938501	3940754	1	1	TAIR Gene Name
AT1G11700	0.401056	5.35826	0.956837	2.23872	2.82885	5.39862	2.63363	3.62036	2.07036	5.58808	2.54638	3.40161	1.38164	0.145785	1.16289	0.243118	Protein of unknown function, DUF584 [Source:TAIR_LOCUS;Acc:AT1G11700]	F25C20.15	3945737	3946613	1	1	UniProtKB Gene Name
AT1G11710	1.19977	1.91647	0.982084	1.36611	1.28083	1.50068	1.27967	1.35372	0.893035	1.91651	1.30225	1.3706	-0.0123819	0.986593	0.00449213	0.995289	Pentatricopeptide repeat (PPR) superfamily protein [Source:TAIR_LOCUS;Acc:AT1G11710]		3948714	3951359	1	1
AT1G11720	6.72557	6.54476	5.9066	6.39231	5.82597	6.04549	6.76688	6.21278	6.24354	6.30283	6.2348	6.26039	-0.179532	0.913417	-0.131921	0.939997	starch synthase 3 [Source:TAIR_LOCUS;Acc:AT1G11720]	SS3	3951553	3957044	1	2	TAIR Gene Name
AT1G11750	7.03539	7.04639	7.83176	7.30451	7.32678	6.95372	6.91359	7.0647	6.66664	6.69178	6.50543	6.62128	-0.239813	0.735118	-0.68323	0.132669	CLP protease proteolytic subunit 6 [Source:TAIR_LOCUS;Acc:AT1G11750]	CLPP6	3967476	3969877	1	2	TAIR Gene Name
AT1G11755	4.10541	4.10426	3.38308	3.86425	3.95001	4.1078	3.72102	3.92627	3.83239	4.07656	3.82116	3.91004	0.0620251	0.937453	0.0457876	0.955433	Undecaprenyl pyrophosphate synthetase family protein [Source:TAIR_LOCUS;Acc:AT1G11755]	LEW1	3969681	3971840	-1	1	TAIR Gene Name
AT1G11760	2.1681	2.46507	1.745	2.12606	2.02179	2.52642	2.34795	2.29872	2.41504	2.47936	2.3032	2.3992	0.172661	0.864797	0.27314	0.749204	MED32; Has 41 Blast hits to 40 proteins in 14 species: Archae - 0; Bacteria - 0; Metazoa - 0; Fungi - 0; Plants - 41; Viruses - 0; Other Eukaryotes - 0 (source: NCBI BLink). [Source:TAIR_LOCUS;Acc:AT1G11760]	MED32	3972032	3973286	-1	1	TAIR Gene Name
AT1G11780	3.12659	3.3725	2.68758	3.06222	2.77289	3.62859	3.06857	3.15669	2.77845	3.65969	3.36347	3.2672	0.0944658	0.890288	0.204982	0.691634	oxidoreductase, 2OG-Fe(II) oxygenase family protein [Source:TAIR_LOCUS;Acc:AT1G11780]		3976839	3979195	-1	1
AT1G11785	-1.13629	1.99301	-0.871172	-0.00481739	-0.99664	1.50068	-0.671608	-0.0558572	-0.054785	0.356442	0.00225665	0.101304	-0.0510398	0.986502	0.106122	0.971386	unknown protein; FUNCTIONS IN: molecular_function unknown; INVOLVED IN: biological_process unknown; LOCATED IN: cellular_component unknown; Has 2 Blast hits to 2 proteins in 1 species: Archae - 0; Bacteria - 0; Metazoa - 0; Fungi - 0; Plants - 2; Vi /.../- 0; Other Eukaryotes - 0 (source: NCBI BLink). [Source:TAIR_LOCUS;Acc:AT1G11785]		3979862	3980956	-1	1
AT1G11790	4.96743	4.10597	4.55121	4.54154	3.41375	3.92501	3.9398	3.75952	3.68901	3.57556	3.5483	3.60429	-0.782018	0.0484905	-0.937247	0.0187489	arogenate dehydratase 1 [Source:TAIR_LOCUS;Acc:AT1G11790]	ADT1	3981248	3985215	1	2	TAIR Gene Name
AT1G11800	2.96785	3.54922	3.27214	3.26307	3.31085	3.48172	3.08413	3.29223	2.85544	3.29428	2.94073	3.03015	0.0291638	0.966094	-0.232919	0.547008	endonuclease/exonuclease/phosphatase family protein [Source:TAIR_LOCUS;Acc:AT1G11800]	F25C20.3	3985225	3987290	-1	1	UniProtKB Gene Name
AT1G11820	4.73708	4.58652	4.25932	4.52764	3.93977	4.40331	4.05868	4.13392	3.60292	4.0391	3.99475	3.87892	-0.39372	0.624299	-0.648719	0.30421	O-Glycosyl hydrolases family 17 protein [Source:TAIR_LOCUS;Acc:AT1G11820]		3991027	3993598	-1	2
AT1G11840	8.52611	8.40847	9.09354	8.67604	8.63749	8.74646	8.49814	8.62736	8.19659	8.29105	8.20234	8.22999	-0.0486757	0.96017	-0.446047	0.353658	glyoxalase I homolog [Source:TAIR_LOCUS;Acc:AT1G11840]	ATGLX1	3995169	3997907	1	6	TAIR Gene Name
AT1G11850	0.957477	-2.18026	2.00327	0.260162	-2.60382	-3.61031	-2.05917	-2.75777	-1.65385	-4.3457	-3.48462	-3.16139	-3.01793	0.00559008	-3.42155	0.00241069	unknown protein; FUNCTIONS IN: molecular_function unknown; INVOLVED IN: biological_process unknown; LOCATED IN: endomembrane system; EXPRESSED IN: 19 plant structures; EXPRESSED DURING: 12 growth stages; Has 38777 Blast hits to 8185 proteins in 741 /.../s: Archae - 46; Bacteria - 14846; Metazoa - 13013; Fungi - 1392; Plants - 5894; Viruses - 543; Other Eukaryotes - 3043 (source: NCBI BLink). [Sou…	F12F1.31	3999199	3999876	1	4	UniProtKB Gene Name
AT1G11860	9.49735	8.90022	10.2341	9.5439	9.41206	8.94259	9.10865	9.15443	8.70864	8.64186	8.44916	8.59989	-0.389465	0.736183	-0.944009	0.221284	Glycine cleavage T-protein family [Source:TAIR_LOCUS;Acc:AT1G11860]	GDCST	4001113	4003442	1	3	UniProtKB Gene Name
AT1G11870	5.04805	4.43039	4.61957	4.69934	4.39333	4.19912	4.79093	4.46113	4.39123	4.13484	4.39811	4.30806	-0.238212	0.616676	-0.39128	0.296322	Seryl-tRNA synthetase [Source:TAIR_LOCUS;Acc:AT1G11870]	ATSRS	4003846	4006739	1	3	TAIR Gene Name
AT1G11880	2.82603	2.4543	2.45075	2.57703	2.20937	2.21699	2.68046	2.36894	2.51361	2.56033	2.7217	2.59855	-0.208092	0.695729	0.0215153	0.979843	transferases, transferring hexosyl groups [Source:TAIR_LOCUS;Acc:AT1G11880]	F12F1.28	4007705	4010433	-1	1	UniProtKB Gene Name
AT1G11890	5.26512	5.18144	5.19119	5.21259	5.15002	5.37152	5.16607	5.2292	5.11685	5.21035	5.15857	5.16192	0.0166176	0.980879	-0.0506629	0.93638	Synaptobrevin family protein [Source:TAIR_LOCUS;Acc:AT1G11890]	SEC22	4010779	4013125	1	1	TAIR Gene Name
AT1G11900	1.5231	1.97802	2.1681	1.88974	1.73877	1.92917	1.73922	1.80239	1.40084	2.08733	1.77577	1.75465	-0.0873523	0.901365	-0.135095	0.827728	Tetratricopeptide repeat (TPR)-like superfamily protein [Source:TAIR_LOCUS;Acc:AT1G11900]		4013121	4014681	-1	1
AT1G11905	2.87923	2.53826	3.591	3.00283	3.43204	2.76165	2.64417	2.94595	2.58583	2.66306	2.9217	2.72353	-0.056879	0.967565	-0.279298	0.782409	B-cell receptor-associated protein 31-like [Source:TAIR_LOCUS;Acc:AT1G11905]		4014847	4016540	1	2
AT1G11910	8.62579	9.41427	8.97011	9.00339	9.27416	9.64717	9.66739	9.52957	9.32907	9.71909	9.75046	9.59954	0.526183	0.124489	0.596149	0.0757432	aspartic proteinase A1 [Source:TAIR_LOCUS;Acc:AT1G11910]	APA1	4016784	4020983	-1	1	TAIR Gene Name
AT1G11925	-2.40644	-3.10801	-3.14164	-2.88536	-0.723679	1.61235	-1.40779	-0.17304	1.12108	-0.714452	2.0372	0.814609	2.71232	0.291727	3.69997	0.11672	Stigma-specific Stig1 family protein [Source:TAIR_LOCUS;Acc:AT1G11925]	F12F1.21	4025930	4026732	-1	1	UniProtKB Gene Name
AT1G11930	5.82421	6.32954	7.30731	6.48702	7.13489	6.41955	6.0159	6.52345	6.27264	6.40582	6.10567	6.26138	0.0364282	0.98187	-0.225641	0.859668	Predicted pyridoxal phosphate-dependent enzyme, YBL036C type [Source:TAIR_LOCUS;Acc:AT1G11930]	F12F1.20	4028692	4030584	1	2	UniProtKB Gene Name
AT1G11940	2.46924	1.7051	2.20113	2.12515	1.67978	1.92917	2.335	1.98131	2.09895	1.72254	2.13971	1.98707	-0.14384	0.885465	-0.138086	0.89111	Core-2/I-branching beta-1,6-N-acetylglucosaminyltransferase family protein [Source:TAIR_LOCUS;Acc:AT1G11940]	AT1G11940/F12F1_19	4031574	4034078	-1	1	UniProtKB Gene Name
AT1G11950	2.70357	3.56426	1.6843	2.65071	2.20937	3.04111	3.26906	2.83985	2.78721	3.29428	3.50107	3.19419	0.189137	0.890804	0.543481	0.548251	Transcription factor jumonji (jmjC) domain-containing protein [Source:TAIR_LOCUS;Acc:AT1G11950]		4034587	4038758	-1	1
AT1G11960	4.2335	5.0811	3.5783	4.29763	3.59686	4.64432	4.50659	4.24925	4.32148	4.82369	4.52922	4.55813	-0.0483802	0.971392	0.260495	0.787661	ERD (early-responsive to dehydration stress) family protein [Source:TAIR_LOCUS;Acc:AT1G11960]	F12F1.17	4039711	4043880	-1	1	UniProtKB Gene Name
AT1G12000	5.27921	4.22717	5.26152	4.92264	5.06564	4.89921	4.85234	4.93906	4.81401	4.43208	4.90241	4.71617	0.0164255	0.987848	-0.206468	0.783141	Phosphofructokinase family protein [Source:TAIR_LOCUS;Acc:AT1G12000]	PFP-BETA1	4049896	4053835	-1	1	UniProtKB Gene Name
AT1G12010	2.18932	0.941501	2.94475	2.02519	2.2507	1.19075	2.4536	1.96502	2.3864	1.28932	2.54015	2.07196	-0.0601719	0.978421	0.0467677	0.98285	2-oxoglutarate (2OG) and Fe(II)-dependent oxygenase superfamily protein [Source:TAIR_LOCUS;Acc:AT1G12010]		4056207	4057933	1	1
AT1G12020	1.91994	2.43252	3.16906	2.50717	3.8848	2.72255	2.26842	2.95859	2.38061	2.65441	2.14793	2.39432	0.451415	0.750765	-0.112859	0.955421	unknown protein; BEST Arabidopsis thaliana protein match is: unknown protein (TAIR:AT1G62422.1); Has 89 Blast hits to 88 proteins in 16 species: Archae - 0; Bacteria - 0; Metazoa - 0; Fungi - 0; Plants - 87; Viruses - 0; Other Eukaryotes - 2 (source /.../ BLink). [Source:TAIR_LOCUS;Acc:AT1G12020]	F12F1.11	4062462	4063337	-1	1	UniProtKB Gene Name
AT1G12050	5.70403	6.49972	5.91697	6.04024	5.86919	6.32868	6.42117	6.20635	6.29894	6.43867	6.30943	6.34901	0.166111	0.819579	0.308775	0.574354	fumarylacetoacetase that converts fumarylacetoacetate to acetoacetate and fumarate	FAH/SSCD1	4072752	4076207	1	1
AT1G12060	-0.0508409	2.07977	2.02798	1.3523	1.91301	1.5576	0.840044	1.43688	0.560327	1.47859	0.61566	0.884857	0.0845799	0.965734	-0.467447	0.722699	BCL-2-associated athanogene 5 [Source:TAIR_LOCUS;Acc:AT1G12060]	ATBAG5	4076334	4076981	1	1	TAIR Gene Name
AT1G12080	0.448755	1.44624	5.02217	2.30572	4.09094	0.97326	1.23849	2.1009	0.20788	1.01787	2.74895	1.3249	-0.204825	0.961918	-0.980824	0.737423	Vacuolar calcium-binding protein-related [Source:TAIR_LOCUS;Acc:AT1G12080]	F12F1.4	4084162	4085045	1	2	UniProtKB Gene Name
AT1G12090	9.58429	8.81637	9.67522	9.35862	8.76986	8.07953	9.8503	8.8999	9.39458	7.75642	9.07142	8.74081	-0.458728	0.852815	-0.617815	0.780818	extensin-like protein [Source:TAIR_LOCUS;Acc:AT1G12090]	ELP	4089847	4090725	-1	1	TAIR Gene Name
AT1G12110	4.2386	5.70649	4.3574	4.76749	4.33373	6.25674	4.44019	5.01022	4.94776	6.67745	4.43871	5.35464	0.242727	0.805733	0.587146	0.367532	nitrate transporter 1.1 [Source:TAIR_LOCUS;Acc:AT1G12110]	NRT1.1	4105233	4109545	1	1	TAIR Gene Name
AT1G12120	6.43561	5.94914	6.95856	6.44777	6.79015	5.99022	6.2373	6.33922	6.2154	5.76683	5.87377	5.952	-0.108546	0.891514	-0.495768	0.242821	Plant protein of unknown function (DUF863) [Source:TAIR_LOCUS;Acc:AT1G12120]	T28K15.14	4114771	4117594	-1	1	UniProtKB Gene Name
AT1G12140	5.73502	5.79815	5.64957	5.72758	5.65184	5.84223	5.92668	5.80692	5.7264	6.03188	5.91561	5.89129	0.0793371	0.886336	0.16371	0.699974	flavin-monooxygenase glucosinolate S-oxygenase 5 [Source:TAIR_LOCUS;Acc:AT1G12140]	FMO GS-OX5	4121369	4124595	1	2	TAIR Gene Name
AT1G12200	2.70848	5.02096	2.40412	3.37785	3.56733	5.10619	2.56318	3.74557	4.00047	5.84709	3.96491	4.60416	0.367716	0.753768	1.22631	0.0884121	Flavin-binding monooxygenase family protein [Source:TAIR_LOCUS;Acc:AT1G12200]		4137533	4140028	1	1
AT1G12210	2.31047	2.63674	1.39391	2.1137	1.94349	2.90381	2.4536	2.43363	2.77845	3.06291	2.68266	2.84134	0.31993	0.693319	0.727638	0.193402	RPS5-like 1 [Source:TAIR_LOCUS;Acc:AT1G12210]	RFL1	4140948	4143605	1	1	TAIR Gene Name
AT1G12220	5.34766	4.54434	4.13978	4.67726	4.53336	3.8275	5.09309	4.48465	5.06298	4.43709	4.97085	4.82364	-0.192608	0.841904	0.146384	0.888716	Disease resistance protein (CC-NBS-LRR class) family [Source:TAIR_LOCUS;Acc:AT1G12220]	RPS5	4144572	4147911	1	2	TAIR Gene Name
AT1G12230	5.61077	5.03355	5.93238	5.52557	5.55549	5.16514	5.60678	5.44247	5.76317	5.10294	5.8275	5.56454	-0.0830979	0.900567	0.0389729	0.958729	Aldolase superfamily protein [Source:TAIR_LOCUS;Acc:AT1G12230]	T28K15.4	4147962	4151056	1	2	UniProtKB Gene Name
AT1G12240	6.12606	4.87865	7.93226	6.31232	6.69526	5.74503	7.41906	6.61978	7.37936	5.32381	6.92048	6.54121	0.307459	0.807204	0.228892	0.868922	Glycosyl hydrolases family 32 protein [Source:TAIR_LOCUS;Acc:AT1G12240]	ATBETAFRUCT4	4153652	4157644	1	1	TAIR Gene Name
AT1G12244	3.35031	2.16819	4.04402	3.18751	3.08501	2.13728	2.88976	2.70402	2.39793	1.88719	2.12312	2.13608	-0.483491	0.652927	-1.05143	0.168738	Polynucleotidyl transferase, ribonuclease H-like superfamily protein [Source:TAIR_LOCUS;Acc:AT1G12244]		4157654	4159046	1	1
AT1G12250	5.31505	5.20229	6.76843	5.76192	5.93501	5.02197	5.58375	5.51358	5.18103	4.86972	5.31284	5.1212	-0.248345	0.888786	-0.640725	0.602	Pentapeptide repeat-containing protein [Source:TAIR_LOCUS;Acc:AT1G12250]		4159265	4161455	1	2
AT1G12270	5.2004	5.41427	5.48811	5.36759	5.75046	5.26616	5.17426	5.39696	5.31105	5.35708	5.18662	5.28492	0.0293691	0.974517	-0.0826784	0.91963	stress-inducible protein, putative [Source:TAIR_LOCUS;Acc:AT1G12270]	Hop1	4172075	4174775	1	1	TAIR Gene Name
AT1G12280	4.60777	4.85146	3.75807	4.40577	4.11848	4.64821	4.50081	4.4225	4.20193	4.75327	4.51505	4.49008	0.0167316	0.989154	0.0843138	0.941435	LRR and NB-ARC domains-containing disease resistance protein [Source:TAIR_LOCUS;Acc:AT1G12280]		4174875	4177559	-1	1
AT1G12290	2.81242	3.63004	1.77444	2.73896	2.96002	2.76165	3.24157	2.98775	2.95202	3.71454	3.38791	3.35149	0.248781	0.783473	0.612525	0.301519	Disease resistance protein (CC-NBS-LRR class) family [Source:TAIR_LOCUS;Acc:AT1G12290]	AT1G12290	4178359	4182593	-1	2	UniProtKB Gene Name
AT1G12300	2.1681	1.78482	0.931148	1.62803	-0.00149531	1.45345	1.58355	1.01184	1.35389	1.62811	1.22651	1.40283	-0.616189	0.508036	-0.225191	0.874074	Tetratricopeptide repeat (TPR)-like superfamily protein [Source:TAIR_LOCUS;Acc:AT1G12300]		4183066	4186124	-1	1
AT1G12310	3.68008	4.78702	5.97517	4.81409	5.87399	5.27706	4.80506	5.3187	4.65465	4.91789	4.90483	4.82579	0.504613	0.744446	0.0116989	0.996265	Calcium-binding EF-hand family protein [Source:TAIR_LOCUS;Acc:AT1G12310]	CML13	4187165	4188056	-1	1	UniProtKB Gene Name
AT1G12320	1.34549	1.88467	3.87715	2.3691	4.20456	3.45818	2.30873	3.32382	2.85127	3.23479	3.05426	3.04677	0.95472	0.495273	0.677668	0.683702	Protein of unknown function (DUF1442) [Source:TAIR_LOCUS;Acc:AT1G12320]		4189355	4190342	1	1
AT1G12330	2.38592	4.476	2.89137	3.2511	2.61018	3.51061	2.81245	2.97775	2.6304	3.37257	2.25835	2.75378	-0.273354	0.794924	-0.497324	0.532214	unknown protein; INVOLVED IN: biological_process unknown; LOCATED IN: chloroplast; EXPRESSED IN: 21 plant structures; EXPRESSED DURING: 12 growth stages; BEST Arabidopsis thaliana protein match is: unknown protein (TAIR:AT5G12900.1); Has 249 Blast h /.../ 249 proteins in 27 species: Archae - 0; Bacteria - 0; Metazoa - 7; Fungi - 14; Plants - 217; Viruses - 0; Other Eukaryotes - 11 (source: NCBI B…	AT1G12330	4194658	4196749	1	1	UniProtKB Gene Name
AT1G12350	4.73347	4.29616	4.66276	4.56413	4.61331	4.34376	4.31733	4.4248	4.24814	4.33745	4.3895	4.32503	-0.139329	0.826768	-0.239101	0.635253	4-phospho-panto-thenoylcysteine synthetase [Source:TAIR_LOCUS;Acc:AT1G12350]	ATCOAB	4198413	4200802	1	1	TAIR Gene Name
AT1G12360	6.32891	5.87886	5.9204	6.04272	5.96169	5.9184	6.22291	6.03434	6.2896	6.09024	6.41584	6.26523	-0.008389	0.99185	0.222503	0.645247	Sec1/munc18-like (SM) proteins superfamily [Source:TAIR_LOCUS;Acc:AT1G12360]	KEU	4200876	4206404	1	1	TAIR Gene Name
AT1G12370	1.58845	1.6303	0.291374	1.17004	0.143109	1.56872	0.94619	0.886005	0.0679602	0.829401	0.107578	0.33498	-0.284036	0.806999	-0.835062	0.239576	photolyase 1 [Source:TAIR_LOCUS;Acc:AT1G12370]	PHR1	4206374	4208951	-1	2	TAIR Gene Name
AT1G12380	1.35804	2.438	1.14758	1.64787	0.506933	1.92053	1.15242	1.19329	0.00790782	1.34445	0.438748	0.597035	-0.454577	0.625545	-1.05084	0.113532	unknown protein; BEST Arabidopsis thaliana protein match is: unknown protein (TAIR:AT1G62870.1); Has 173 Blast hits to 170 proteins in 34 species: Archae - 0; Bacteria - 4; Metazoa - 25; Fungi - 8; Plants - 123; Viruses - 7; Other Eukaryotes - 6 (so /.../NCBI BLink). [Source:TAIR_LOCUS;Acc:AT1G12380]		4214262	4217132	-1	1
AT1G12390	3.53292	3.32322	2.93818	3.26477	2.82335	3.43425	3.27246	3.17668	3.46318	3.49826	3.27261	3.41135	-0.0880878	0.899312	0.146576	0.806341	Cornichon family protein [Source:TAIR_LOCUS;Acc:AT1G12390]		4220100	4221774	1	1
AT1G12400	2.97601	2.73779	3.08222	2.932	3.41007	3.42517	2.84479	3.22668	2.83447	3.42164	3.06296	3.10636	0.294671	0.694742	0.174352	0.850873	Nucleotide excision repair, TFIIH, subunit TTDA [Source:TAIR_LOCUS;Acc:AT1G12400]		4221863	4222837	1	1
AT1G12410	7.04779	6.96813	7.05542	7.02378	6.69448	6.95942	7.03356	6.89582	6.9384	6.77267	6.91362	6.8749	-0.127959	0.767133	-0.148883	0.713057	CLP protease proteolytic subunit 2 [Source:TAIR_LOCUS;Acc:AT1G12410]	CLPR2	4223030	4225124	1	1	TAIR Gene Name
AT1G12420	3.44744	2.97815	4.2378	3.55446	4.53336	3.69298	4.05474	4.09369	4.28375	3.66399	4.39982	4.11585	0.539231	0.470974	0.56139	0.44414	ACT domain repeat 8 [Source:TAIR_LOCUS;Acc:AT1G12420]	ACR8	4226362	4229138	-1	1	TAIR Gene Name
AT1G12430	4.62474	5.14546	3.71612	4.49544	3.65417	4.6062	4.04881	4.10306	4.39123	4.81796	4.41855	4.54258	-0.392382	0.696146	0.047138	0.976294	armadillo repeat kinesin 3 [Source:TAIR_LOCUS;Acc:AT1G12430]	PAK	4233873	4238764	-1	2	TAIR Gene Name
AT1G12440	5.85938	5.1983	5.43047	5.49605	5.36579	5.03882	5.91533	5.43998	5.84377	5.11856	6.05829	5.67354	-0.0560717	0.96663	0.177488	0.873214	A20/AN1-like zinc finger family protein [Source:TAIR_LOCUS;Acc:AT1G12440]	SAP1	4241592	4243008	-1	2	UniProtKB Gene Name
AT1G12450	3.7837	2.67431	3.26162	3.23988	2.72654	2.67213	3.29603	2.89823	3.12408	2.32427	3.10993	2.85276	-0.341644	0.677654	-0.387117	0.617084	SNARE associated Golgi protein family [Source:TAIR_LOCUS;Acc:AT1G12450]		4244308	4245993	1	1
AT1G12460	3.64211	3.06546	3.93158	3.54638	1.87136	2.16678	2.74062	2.25959	2.0189	1.88719	2.64833	2.18481	-1.2868	0.0525446	-1.36158	0.0399437	Leucine-rich repeat protein kinase family protein [Source:TAIR_LOCUS;Acc:AT1G12460]		4247249	4250630	1	1
AT1G12470	5.53406	5.57887	4.59855	5.23716	4.67209	5.11836	5.53089	5.10711	5.35861	5.45682	5.59044	5.46862	-0.130044	0.906558	0.231465	0.80451	zinc ion binding [Source:TAIR_LOCUS;Acc:AT1G12470]		4251032	4257392	1	1
AT1G12480	3.4533	4.25517	2.89137	3.53328	1.37277	3.35997	1.87076	2.20117	2.5189	3.17273	1.75438	2.482	-1.33211	0.0249711	-1.05128	0.0786305	C4-dicarboxylate transporter/malic acid transport protein [Source:TAIR_LOCUS;Acc:AT1G12480]	OZS1	4257268	4259300	-1	1	TAIR Gene Name
AT1G12500	4.16375	4.64169	5.42687	4.7441	4.99744	4.19558	4.25689	4.4833	4.24814	3.66399	4.13322	4.01511	-0.260795	0.80261	-0.728987	0.261567	Nucleotide-sugar transporter family protein [Source:TAIR_LOCUS;Acc:AT1G12500]		4263150	4265044	-1	1
AT1G12520	4.22496	4.76883	5.69733	4.89704	5.69194	4.87511	4.34663	4.97123	5.01251	5.31976	5.32009	5.21745	0.0741853	0.958396	0.320411	0.744878	copper chaperone for SOD1 [Source:TAIR_LOCUS;Acc:AT1G12520]	ATCCS	4267106	4268926	-1	3	TAIR Gene Name
AT1G12530	3.61884	3.66532	3.43086	3.57167	3.96775	3.4788	3.42073	3.62243	3.65377	3.61603	3.16353	3.47777	0.050753	0.941407	-0.0938993	0.876125	unknown protein; BEST Arabidopsis thaliana protein match is: unknown protein (TAIR:AT1G56420.1); Has 54 Blast hits to 53 proteins in 13 species: Archae - 0; Bacteria - 0; Metazoa - 0; Fungi - 0; Plants - 54; Viruses - 0; Other Eukaryotes - 0 (source /.../ BLink). [Source:TAIR_LOCUS;Acc:AT1G12530]		4268986	4270787	-1	1
AT1G12550	2.18932	3.07951	2.80027	2.6897	2.3905	2.74223	1.95786	2.36353	2.38061	2.56033	2.08937	2.34343	-0.326168	0.603266	-0.346267	0.569678	D-isomer specific 2-hydroxyacid dehydrogenase family protein [Source:TAIR_LOCUS;Acc:AT1G12550]	HPR3	4274594	4275981	1	1	UniProtKB Gene Name
AT1G12580	5.18199	4.66618	5.82828	5.22549	5.86437	4.80726	4.95626	5.2093	5.30358	4.85485	4.84948	5.00264	-0.0161877	0.989561	-0.222845	0.801286	phosphoenolpyruvate carboxylase-related kinase 1 [Source:TAIR_LOCUS;Acc:AT1G12580]	PEPKR1	4282899	4285829	1	1	TAIR Gene Name
AT1G12610	-0.712458	-6.54837	0.479357	-2.26049	1.47321	-1.57166	-2.75032	-0.949589	1.77454	-6.65232	-6.28431	-3.7207	1.3109	0.746624	-1.46021	0.705999	Integrase-type DNA-binding superfamily protein [Source:TAIR_LOCUS;Acc:AT1G12610]	DDF1	4289944	4291017	-1	1	TAIR Gene Name
AT1G12620	2.65864	2.83633	2.9899	2.82829	1.99291	2.60382	2.63891	2.41188	2.20792	2.5969	2.43665	2.41382	-0.41641	0.258859	-0.41447	0.261854	Pentatricopeptide repeat (PPR) superfamily protein [Source:TAIR_LOCUS;Acc:AT1G12620]		4294594	4297084	-1	1
AT1G12640	4.70797	4.8535	3.64883	4.40343	3.49256	5.35185	5.1905	4.6783	4.85966	5.02132	5.29179	5.05759	0.274872	0.868078	0.654157	0.570741	MBOAT (membrane bound O-acyl transferase) family protein [Source:TAIR_LOCUS;Acc:AT1G12640]		4303312	4305798	-1	1
AT1G12650	4.41708	4.32726	5.06282	4.60239	5.49908	4.50976	4.04683	4.68522	4.38412	4.45325	4.35986	4.39908	0.0828367	0.960262	-0.203312	0.887323	unknown protein; CONTAINS InterPro DOMAIN/s: Protein of unknown function DUF947 (InterPro:IPR009292); Has 700 Blast hits to 631 proteins in 192 species: Archae - 0; Bacteria - 32; Metazoa - 138; Fungi - 168; Plants - 60; Viruses - 0; Other Eukaryote /.../2 (source: NCBI BLink). [Source:TAIR_LOCUS;Acc:AT1G12650]		4305933	4308005	1	4
AT1G12680	4.61432	4.79655	4.5068	4.63922	5.01602	4.64172	4.91232	4.85669	4.79169	4.70743	4.67791	4.72567	0.217465	0.582242	0.0864499	0.880191	phosphoenolpyruvate carboxylase-related kinase 2 [Source:TAIR_LOCUS;Acc:AT1G12680]	PEPKR2	4319886	4322945	-1	1	TAIR Gene Name
AT1G12700	3.21891	2.28227	2.74125	2.74747	2.65413	2.19568	2.80777	2.55253	2.45419	2.39874	2.73266	2.52853	-0.194945	0.797838	-0.218947	0.762098	ATP binding;nucleic acid binding;helicases [Source:TAIR_LOCUS;Acc:AT1G12700]	RPF1	4323556	4326333	-1	1	UniProtKB Gene Name
AT1G12710	5.69293	5.91612	5.52343	5.71083	5.21805	5.96977	5.36358	5.51713	5.46868	6.04007	5.69447	5.73441	-0.193695	0.810417	0.0235774	0.982731	phloem protein 2-A12 [Source:TAIR_LOCUS;Acc:AT1G12710]	AtPP2-A12	4326739	4328481	-1	1	TAIR Gene Name
AT1G12730	4.85574	4.5914	4.98849	4.81188	4.41019	3.94838	4.76706	4.37521	4.71355	4.26743	4.74281	4.5746	-0.436671	0.408337	-0.237282	0.73774	GPI transamidase subunit PIG-U [Source:TAIR_LOCUS;Acc:AT1G12730]		4334615	4337844	1	2
AT1G12750	5.13081	6.01387	5.19965	5.44811	4.21737	5.12951	4.7106	4.68583	4.57712	4.90892	4.58	4.68868	-0.762284	0.0506547	-0.759426	0.0515727	RHOMBOID-like protein 6 [Source:TAIR_LOCUS;Acc:AT1G12750]	RBL6	4344985	4348328	-1	3	TAIR Gene Name
AT1G12760	5.51667	6.00843	6.43004	5.98505	6.25731	6.04158	6.07683	6.12524	6.08793	5.962	6.18513	6.07835	0.140191	0.861913	0.0933045	0.917143	Zinc finger, C3HC4 type (RING finger) family protein [Source:TAIR_LOCUS;Acc:AT1G12760]		4348498	4350867	1	2
AT1G12770	5.58432	5.80288	6.06265	5.81661	6.15587	5.71213	5.94274	5.93691	5.70567	5.61416	5.42971	5.58318	0.120299	0.847481	-0.233435	0.622601	P-loop containing nucleoside triphosphate hydrolases superfamily protein [Source:TAIR_LOCUS;Acc:AT1G12770]	ISE1	4351064	4353685	1	1	TAIR Gene Name
AT1G12775	2.18228	2.07977	1.88659	2.04955	1.6183	1.90309	1.73922	1.75354	1.56431	1.79543	1.58289	1.64754	-0.296008	0.775178	-0.402003	0.656275	Pentatricopeptide repeat (PPR) superfamily protein [Source:TAIR_LOCUS;Acc:AT1G12775]		4353906	4355929	1	1
AT1G12780	6.02542	5.37177	6.60522	6.0008	7.34968	5.59669	6.45887	6.46841	6.49866	5.7693	6.67227	6.31341	0.467608	0.586215	0.312606	0.76292	UDP-D-glucose/UDP-D-galactose 4-epimerase 1 [Source:TAIR_LOCUS;Acc:AT1G12780]	UGE1	4355926	4358328	-1	1	TAIR Gene Name
AT1G12790	3.07052	1.2601	1.9654	2.09867	1.02199	0.90454	2.56872	1.49842	2.74735	1.65449	2.89269	2.43151	-0.600255	0.597239	0.332834	0.822087	CONTAINS InterPro DOMAIN/s: RuvA domain 2-like (InterPro:IPR010994); Has 29 Blast hits to 29 proteins in 9 species: Archae - 0; Bacteria - 2; Metazoa - 0; Fungi - 0; Plants - 27; Viruses - 0; Other Eukaryotes - 0 (source: NCBI BLink). [Source:TAIR_LOCUS;Acc:AT1G12790]	F13K23.4	4359151	4361272	-1	1	UniProtKB Gene Name
AT1G12800	8.4206	7.10336	7.7585	7.76082	7.22026	6.61781	7.86753	7.2352	7.22782	6.79575	7.13645	7.05334	-0.525622	0.408426	-0.70748	0.210694	Nucleic acid-binding, OB-fold-like protein [Source:TAIR_LOCUS;Acc:AT1G12800]	F13K23.5	4361551	4365331	-1	1	UniProtKB Gene Name
AT1G12810	3.29917	5.19671	4.66276	4.38621	4.65486	5.23985	4.44019	4.7783	4.65701	5.20305	4.65656	4.83887	0.392088	0.608095	0.452656	0.524142	proline-rich family protein [Source:TAIR_LOCUS;Acc:AT1G12810]	F13K23.6	4367256	4368822	1	2	UniProtKB Gene Name
AT1G12820	5.2263	5.29849	5.42084	5.31521	5.65979	5.6485	5.34275	5.55035	5.30583	5.52336	5.08384	5.30434	0.235138	0.606308	-0.0108641	0.988995	auxin signaling F-box 3 [Source:TAIR_LOCUS;Acc:AT1G12820]	AFB3	4368760	4371293	-1	1	TAIR Gene Name
AT1G12830	3.03189	3.55676	4.37477	3.65447	4.92329	3.86373	3.31922	4.03541	3.419	3.36994	2.97343	3.25412	0.380938	0.799269	-0.400351	0.784925	unknown protein; FUNCTIONS IN: molecular_function unknown; INVOLVED IN: biological_process unknown; LOCATED IN: cellular_component unknown; EXPRESSED IN: 23 plant structures; EXPRESSED DURING: 13 growth stages; Has 39778 Blast hits to 22088 proteins /.../60 species: Archae - 152; Bacteria - 6161; Metazoa - 14109; Fungi - 6144; Plants - 2156; Viruses - 601; Other Eukaryotes - 10455 (source: NCBI B…	F13K23.8	4374250	4375170	-1	1	UniProtKB Gene Name
AT1G12840	7.54988	6.71782	6.24414	6.83728	6.12332	6.94592	7.12053	6.72993	6.70941	6.77927	7.14131	6.87666	-0.107352	0.936672	0.0393836	0.978807	vacuolar ATP synthase subunit C (VATC) / V-ATPase C subunit / vacuolar proton pump C subunit (DET3) [Source:TAIR_LOCUS;Acc:AT1G12840]	DET3	4375515	4378514	1	1	TAIR Gene Name
AT1G12845	4.21293	2.06567	4.25932	3.51264	3.39523	2.85044	3.88092	3.37553	2.90455	1.36592	2.41638	2.22895	-0.137104	0.930493	-1.28369	0.0733887	unknown protein; FUNCTIONS IN: molecular_function unknown; INVOLVED IN: biological_process unknown; LOCATED IN: endomembrane system; EXPRESSED IN: 22 plant structures; EXPRESSED DURING: 13 growth stages; Has 8 Blast hits to 8 proteins in 4 species: /.../ - 0; Bacteria - 0; Metazoa - 0; Fungi - 0; Plants - 8; Viruses - 0; Other Eukaryotes - 0 (source: NCBI BLink). [Source:TAIR_LOCUS;Acc:AT1G12845]		4378939	4379516	-1	1
AT1G12850	4.6338	4.96666	4.32458	4.64168	4.43969	4.69655	4.88042	4.67222	4.62847	4.80641	5.06777	4.83422	0.0305396	0.975446	0.192539	0.783659	Phosphoglycerate mutase family protein [Source:TAIR_LOCUS;Acc:AT1G12850]	F13K23.10	4379707	4381612	-1	1	UniProtKB Gene Name
AT1G12860	5.08248	4.50088	4.42091	4.66809	3.89808	3.83665	3.98606	3.90693	3.97791	3.88598	3.40854	3.75748	-0.761166	0.168413	-0.910614	0.0881494	basic helix-loop-helix (bHLH) DNA-binding superfamily protein [Source:TAIR_LOCUS;Acc:AT1G12860]	SCRM2/ICE2/AtbHLH33	4384353	4386610	1	1	TAIR Gene Name
AT1G12880	4.29189	2.79004	5.05043	4.04412	4.76704	3.0725	3.44503	3.76152	3.71203	3.17273	3.46214	3.44897	-0.282598	0.839869	-0.595155	0.554936	nudix hydrolase homolog 12 [Source:TAIR_LOCUS;Acc:AT1G12880]	atnudt12	4389751	4391151	1	1	TAIR Gene Name
AT1G12900	11.0941	8.21037	10.1652	9.82322	9.23174	8.29136	10.0184	9.18049	9.13908	7.89458	9.28412	8.77259	-0.642733	0.750409	-1.05062	0.510609	glyceraldehyde 3-phosphate dehydrogenase A subunit 2 [Source:TAIR_LOCUS;Acc:AT1G12900]	GAPA-2	4392450	4394400	-1	4	TAIR Gene Name
AT1G12910	4.40353	3.83599	4.22146	4.15366	4.50919	4.17413	4.56867	4.41733	4.79383	4.14713	4.7775	4.57282	0.263674	0.514976	0.419163	0.206862	Transducin/WD40 repeat-like superfamily protein [Source:TAIR_LOCUS;Acc:AT1G12910]	ATAN11	4394897	4396291	-1	1	TAIR Gene Name
AT1G12920	6.50107	5.85986	6.70652	6.35582	7.14956	6.21135	6.06171	6.47421	6.21066	6.08827	6.35197	6.21697	0.118392	0.920694	-0.138852	0.903752	eukaryotic release factor 1-2 [Source:TAIR_LOCUS;Acc:AT1G12920]	ERF1-2	4396348	4398193	-1	1	TAIR Gene Name
AT1G12930	4.93221	4.82064	3.70447	4.48577	3.79403	4.10023	4.62554	4.17327	4.54311	4.65148	4.72788	4.64083	-0.312506	0.764584	0.155053	0.905762	ARM repeat superfamily protein [Source:TAIR_LOCUS;Acc:AT1G12930]		4398375	4405605	-1	1
AT1G12940	-3.68661	1.29689	-5.99094	-2.79355	-2.04866	2.85044	-2.54409	-0.580769	-1.38569	3.1697	-3.12304	-0.446341	2.21279	0.222404	2.34721	0.187512	nitrate transporter2.5 [Source:TAIR_LOCUS;Acc:AT1G12940]	ATNRT2.5	4416405	4418590	1	1	TAIR Gene Name
AT1G12970	3.84737	3.88067	4.32458	4.01754	4.8507	3.69046	4.22744	4.2562	4.4712	3.77333	4.16585	4.13679	0.238661	0.746086	0.119254	0.898284	plant intracellular ras group-related LRR 3 [Source:TAIR_LOCUS;Acc:AT1G12970]	PIRL3	4423640	4425789	1	1	TAIR Gene Name
AT1G12990	5.61143	4.08878	5.52343	5.07454	4.77867	4.58065	5.63407	4.9978	4.96399	4.55349	5.47344	4.99697	-0.0767469	0.953626	-0.0775716	0.953057	beta-1,4-N-acetylglucosaminyltransferase family protein [Source:TAIR_LOCUS;Acc:AT1G12990]	F3F19.2	4433640	4436075	1	1	UniProtKB Gene Name
AT1G13000	5.24331	5.04869	5.13063	5.14087	5.07749	4.9197	5.13658	5.04459	5.23776	5.06311	5.27323	5.19137	-0.096286	0.826888	0.0504937	0.923012	Protein of unknown function (DUF707) [Source:TAIR_LOCUS;Acc:AT1G13000]		4436105	4439476	-1	2
AT1G13020	4.68823	4.95157	5.81634	5.15205	5.63259	4.99276	5.05417	5.22651	4.72032	5.00711	4.98233	4.90325	0.0744615	0.955198	-0.248792	0.805056	eukaryotic initiation factor 4B2 [Source:TAIR_LOCUS;Acc:AT1G13020]	EIF4B2	4440544	4443684	-1	1	TAIR Gene Name
AT1G13030	3.39056	3.68608	2.87772	3.31812	3.6604	3.4788	2.71085	3.28335	2.87611	3.49826	2.5213	2.96522	-0.0347699	0.971982	-0.352897	0.504387	sphere organelles protein-related [Source:TAIR_LOCUS;Acc:AT1G13030]	F3F19.5	4444043	4447406	-1	1	UniProtKB Gene Name
AT1G13040	1.67121	2.17477	-1.39979	0.815399	-0.662715	0.850749	1.71941	0.635816	0.941655	1.86479	1.5584	1.45495	-0.179583	0.973889	0.639551	0.889248	Pentatricopeptide repeat (PPR-like) superfamily protein [Source:TAIR_LOCUS;Acc:AT1G13040]		4447647	4449200	1	1
AT1G13050	0.854989	2.25148	1.25529	1.45392	1.50068	2.15211	1.27967	1.64415	1.53308	2.18083	1.14655	1.62015	0.19023	0.810085	0.166233	0.840995	unknown protein; BEST Arabidopsis thaliana protein match is: unknown protein (TAIR:AT3G26350.1); Has 538 Blast hits to 510 proteins in 88 species: Archae - 0; Bacteria - 23; Metazoa - 81; Fungi - 36; Plants - 361; Viruses - 8; Other Eukaryotes - 29 /.../e: NCBI BLink). [Source:TAIR_LOCUS;Acc:AT1G13050]	F3F19.7	4450238	4451742	1	2	UniProtKB Gene Name
AT1G13060	6.04398	6.40481	7.30198	6.58359	7.16975	6.60497	6.32769	6.7008	6.41676	6.53293	6.37213	6.44061	0.117214	0.944985	-0.142984	0.930181	20S proteasome beta subunit E1 [Source:TAIR_LOCUS;Acc:AT1G13060]	PBE1	4452212	4454876	1	2	TAIR Gene Name
AT1G13080	5.11427	2.97815	3.52198	3.87146	3.87141	2.80906	4.22394	3.6348	3.68436	2.85632	3.11831	3.21966	-0.236662	0.788079	-0.651804	0.238909	cytochrome P450, family 71, subfamily B, polypeptide 2 [Source:TAIR_LOCUS;Acc:AT1G13080]	CYP71B2	4459166	4460940	1	2	TAIR Gene Name
AT1G13090	6.47395	6.89272	6.64082	6.66916	6.86785	6.86302	6.85658	6.86248	6.59347	6.94339	6.52669	6.68785	0.193317	0.634233	0.0186863	0.978421	cytochrome P450, family 71, subfamily B, polypeptide 28 [Source:TAIR_LOCUS;Acc:AT1G13090]	CYP71B28	4461806	4463543	1	1	TAIR Gene Name
AT1G13100	3.97504	2.74663	3.70447	3.47538	3.74203	2.41422	3.45403	3.20343	3.7702	2.73862	3.07162	3.19348	-0.271951	0.663286	-0.281904	0.646422	cytochrome P450, family 71, subfamily B, polypeptide 29 [Source:TAIR_LOCUS;Acc:AT1G13100]	CYP71B29	4463924	4465538	1	1	TAIR Gene Name
AT1G13110	7.80245	7.67409	7.40737	7.62797	7.99978	6.92333	7.40523	7.44278	8.20307	7.89838	8.28412	8.12852	-0.18519	0.80906	0.500552	0.29936	cytochrome P450, family 71 subfamily B, polypeptide 7 [Source:TAIR_LOCUS;Acc:AT1G13110]	CYP71B7	4467220	4469033	1	1	TAIR Gene Name
AT1G13120	4.62604	4.86361	4.00326	4.49764	4.25097	4.52112	4.52947	4.43385	4.31999	4.73511	4.34924	4.46811	-0.0637818	0.915328	-0.0295233	0.964416	Embryo defective 1745 protein; Putative uncharacterized protein At1g13120 [Source:UniProtKB/TrEMBL;Acc:Q0WPZ7]	EMB1745	4469181	4473213	-1	1	UniProtKB Gene Name
AT1G13160	4.33853	4.36485	3.51312	4.07217	4.21524	4.40331	4.18482	4.26779	4.09256	4.44084	4.28573	4.27304	0.195622	0.671897	0.200879	0.659873	ARM repeat superfamily protein [Source:TAIR_LOCUS;Acc:AT1G13160]	F3F19.18	4484584	4488577	1	1	UniProtKB Gene Name
AT1G13170	5.21254	4.02331	4.4233	4.55305	3.65104	3.26814	4.28911	3.7361	3.75255	3.25775	3.88629	3.63219	-0.816953	0.13001	-0.920857	0.0815583	OSBP(oxysterol binding protein)-related protein 1D [Source:TAIR_LOCUS;Acc:AT1G13170]	ORP1D	4488533	4492587	-1	2	TAIR Gene Name
AT1G13180	4.03292	2.97439	3.31346	3.44026	3.16568	2.98858	3.42684	3.1937	3.54249	2.88614	3.44561	3.29141	-0.246557	0.673189	-0.148846	0.836851	Actin-like ATPase superfamily protein [Source:TAIR_LOCUS;Acc:AT1G13180]	DIS1/ARP3	4495028	4498469	1	1	TAIR Gene Name
AT1G13190	5.50966	5.21655	5.57759	5.4346	4.98114	5.07866	6.01692	5.35891	5.50356	4.89264	5.65132	5.34917	-0.0756909	0.94518	-0.0854268	0.936672	RNA-binding (RRM/RBD/RNP motifs) family protein [Source:TAIR_LOCUS;Acc:AT1G13190]	F3F19.21	4498881	4501613	1	1	UniProtKB Gene Name
AT1G13195	3.16994	3.57914	3.00884	3.25264	3.19589	3.52483	3.14474	3.28849	3.19144	3.63365	3.16353	3.32954	0.0358519	0.956861	0.0769037	0.894697	RING/U-box superfamily protein [Source:TAIR_LOCUS;Acc:AT1G13195]	F3F19.22	4501581	4503591	-1	2	UniProtKB Gene Name
AT1G13210	7.86327	7.8341	6.76168	7.48635	6.79453	6.94749	8.20464	7.31556	8.38321	8.19589	8.56866	8.38259	-0.170795	0.917671	0.896235	0.296778	autoinhibited Ca2+/ATPase II [Source:TAIR_LOCUS;Acc:AT1G13210]	ACA.l	4508963	4513938	-1	1	TAIR Gene Name
AT1G13220	4.94474	4.6275	4.60489	4.72571	4.00262	4.15965	4.67769	4.27999	4.38412	4.29115	4.47006	4.38178	-0.445722	0.346818	-0.34393	0.521282	nuclear matrix constituent protein-related [Source:TAIR_LOCUS;Acc:AT1G13220]	LINC2	4515606	4520284	1	2	TAIR Gene Name
AT1G13245	6.19193	4.35913	5.97186	5.50764	6.66287	5.24754	5.51236	5.80759	6.23694	5.49497	5.8096	5.84717	0.29995	0.730601	0.33953	0.68086	ROTUNDIFOLIA like 17 [Source:TAIR_LOCUS;Acc:AT1G13245]	RTFL17	4525486	4526064	-1	1	TAIR Gene Name
AT1G13250	3.72678	4.02331	4.95401	4.2347	4.41205	3.79972	3.35172	3.85449	3.75033	2.62815	2.37497	2.91782	-0.380207	0.757771	-1.31688	0.0792924	galacturonosyltransferase-like 3 [Source:TAIR_LOCUS;Acc:AT1G13250]	GATL3	4528623	4530063	-1	1	TAIR Gene Name
AT1G13260	7.26137	5.80601	7.34641	6.8046	8.06675	6.07162	7.33324	7.1572	7.85539	6.03311	7.05407	6.98086	0.352607	0.663924	0.176259	0.868675	related to ABI3/VP1 1 [Source:TAIR_LOCUS;Acc:AT1G13260]	RAV1	4542168	4543742	1	1	TAIR Gene Name
AT1G13270	6.32731	6.9921	6.59497	6.63813	6.77691	6.82069	6.60353	6.73371	6.30969	6.66773	6.26042	6.41261	0.0955811	0.90622	-0.225515	0.709352	methionine aminopeptidase 1B [Source:TAIR_LOCUS;Acc:AT1G13270]	MAP1C	4544953	4547312	1	2	TAIR Gene Name
AT1G13280	5.23227	5.22048	6.12145	5.52473	5.34136	5.22954	5.20478	5.25856	5.43429	5.02298	5.24303	5.23343	-0.266174	0.810408	-0.291301	0.785035	allene oxide cyclase 4 [Source:TAIR_LOCUS;Acc:AT1G13280]	AOC4	4547454	4548875	1	1	TAIR Gene Name
AT1G13310	-3.68661	-4.97214	-5.99094	-4.88323	-0.441475	0.0366445	-1.49789	-0.634241	-0.593487	-0.626229	-1.54241	-0.920708	4.24899	0.00144444	3.96253	0.00231538	Endosomal targeting BRO1-like domain-containing protein [Source:TAIR_LOCUS;Acc:AT1G13310]	T6J4.7	4561068	4563061	-1	1	UniProtKB Gene Name
AT1G13320	6.06662	5.66903	5.88213	5.87259	5.75789	5.83716	5.91316	5.83607	5.72194	5.7196	5.98103	5.80752	-0.036522	0.946804	-0.0650709	0.893549	protein phosphatase 2A subunit A3 [Source:TAIR_LOCUS;Acc:AT1G13320]	PP2AA3	4563471	4567807	-1	3	TAIR Gene Name
AT1G13330	1.59906	0.811718	1.14758	1.18612	0.730525	0.83236	0.175487	0.579457	0.641258	0.377833	0.383932	0.467674	-0.60666	0.432173	-0.718443	0.316086	Arabidopsis Hop2 homolog [Source:TAIR_LOCUS;Acc:AT1G13330]	AHP2	4567935	4570598	1	1	TAIR Gene Name
AT1G13340	1.62004	0.35588	0.0284154	0.668112	4.80307	4.67258	3.93123	4.46896	5.41781	5.14779	5.20044	5.25535	3.80085	0.000302862	4.58723	6.57792e-05	Regulator of Vps4 activity in the MVB pathway protein [Source:TAIR_LOCUS;Acc:AT1G13340]	AT1G13340/F13B4_1	4569448	4571118	-1	1	UniProtKB Gene Name
AT1G13350	5.8867	5.68334	4.88427	5.48477	4.82147	5.42671	5.73896	5.32905	5.45731	5.54314	5.67623	5.5589	-0.155725	0.887436	0.0741238	0.95344	Protein kinase superfamily protein [Source:TAIR_LOCUS;Acc:AT1G13350]	T6J4.10	4572419	4576632	-1	2	UniProtKB Gene Name
AT1G13360	4.74784	7.08054	6.66012	6.16283	7.09502	6.51173	6.33703	6.64793	6.72772	6.78535	6.34312	6.61873	0.485093	0.720956	0.455893	0.743923	unknown protein; BEST Arabidopsis thaliana protein match is: unknown protein (TAIR:AT3G25870.1); Has 69 Blast hits to 69 proteins in 16 species: Archae - 0; Bacteria - 0; Metazoa - 6; Fungi - 0; Plants - 63; Viruses - 0; Other Eukaryotes - 0 (source /.../ BLink). [Source:TAIR_LOCUS;Acc:AT1G13360]	T6J4.11	4576873	4577967	-1	3	UniProtKB Gene Name
AT1G13380	3.1841	3.91231	3.92153	3.67264	3.83046	3.85025	3.62859	3.76977	4.05357	3.87492	3.93682	3.9551	0.0971255	0.904882	0.282459	0.604766	Protein of unknown function (DUF1218) [Source:TAIR_LOCUS;Acc:AT1G13380]	T6J4.13	4589071	4590423	-1	1	UniProtKB Gene Name
AT1G13390	5.15078	6.099	5.88741	5.7124	5.59247	6.00034	5.63736	5.74339	5.78575	5.95595	5.95452	5.89874	0.030994	0.974635	0.186343	0.789231	unknown protein; BEST Arabidopsis thaliana protein match is: unknown protein (TAIR:AT1G68490.1); Has 114 Blast hits to 114 proteins in 18 species: Archae - 0; Bacteria - 0; Metazoa - 0; Fungi - 0; Plants - 114; Viruses - 0; Other Eukaryotes - 0 (sou /.../CBI BLink). [Source:TAIR_LOCUS;Acc:AT1G13390]	T6J4.14	4592481	4594391	-1	2	UniProtKB Gene Name
AT1G13410	1.58845	1.85216	1.4676	1.63607	1.16571	2.29249	1.21037	1.55619	1.12108	1.90192	1.17907	1.40069	-0.0798775	0.93822	-0.235375	0.754762	Tetratricopeptide repeat (TPR)-like superfamily protein [Source:TAIR_LOCUS;Acc:AT1G13410]	T6J4.15	4601261	4603298	1	1	UniProtKB Gene Name
AT1G13440	9.59228	8.87226	10.067	9.5105	10.4978	9.3451	9.6895	9.84412	9.56688	9.20959	9.7339	9.50346	0.333617	0.656127	-0.00704598	0.995676	glyceraldehyde-3-phosphate dehydrogenase C2 [Source:TAIR_LOCUS;Acc:AT1G13440]	GAPC-2	4608196	4610647	-1	2	TAIR Gene Name
AT1G13448	3.98721	1.36776	3.5612	2.97206	3.89543	1.31495	2.97569	2.72869	3.57805	1.50784	2.45	2.51196	-0.243364	0.865883	-0.460095	0.682499	other RNA [Source:TAIR_LOCUS;Acc:AT1G13448]		4612243	4612929	1	1
AT1G13450	5.64509	4.95819	4.94401	5.18243	5.09392	4.85845	5.23901	5.06379	5.38358	4.94358	5.23346	5.18687	-0.118638	0.843453	0.00443826	0.995682	Homeodomain-like superfamily protein [Source:TAIR_LOCUS;Acc:AT1G13450]	GT-1	4612731	4615353	-1	3	TAIR Gene Name
AT1G13460	4.44822	4.25671	4.19101	4.29865	3.49952	4.01025	4.13344	3.88107	3.77457	4.18638	4.48952	4.15016	-0.417575	0.306737	-0.148491	0.821543	Protein phosphatase 2A regulatory B subunit family protein [Source:TAIR_LOCUS;Acc:AT1G13460]	B'THETA	4615813	4618329	1	2	UniProtKB Gene Name
AT1G13470	5.84218	5.03265	5.00302	5.29262	6.38199	6.32908	5.95651	6.22253	6.21501	6.27537	5.82878	6.10638	0.929909	0.0273281	0.813765	0.0534934	Protein of unknown function (DUF1262) [Source:TAIR_LOCUS;Acc:AT1G13470]	T6J4.20	4620228	4621580	-1	1	UniProtKB Gene Name
AT1G13480	-3.32402	-6.54837	-5.99094	-5.28778	-0.60419	-1.30194	-2.05917	-1.32177	-0.965291	-1.0173	-3.48462	-1.8224	3.96601	0.0181909	3.46538	0.0376876	Protein of unknown function (DUF1262) [Source:TAIR_LOCUS;Acc:AT1G13480]	T6J4.21	4622634	4624070	-1	1	UniProtKB Gene Name
AT1G13520	-6.49411	-2.18026	-5.99094	-4.88844	1.82848	3.25453	1.60531	2.22944	4.19543	3.88965	3.89362	3.9929	7.11788	0.000252659	8.88134	3.87947e-05	Protein of unknown function (DUF1262) [Source:TAIR_LOCUS;Acc:AT1G13520]	AT1G13520	4631778	4633248	-1	1	UniProtKB Gene Name
AT1G13530	-2.10157	-3.75649	-2.47982	-2.77929	-0.723679	-1.07501	-1.59401	-1.1309	-1.38569	-1.07463	-2.20801	-1.55611	1.6484	0.07832	1.22318	0.220562	Protein of unknown function (DUF1262) [Source:TAIR_LOCUS;Acc:AT1G13530]		4633740	4635129	-1	1
AT1G13540	-2.79348	-4.97214	-2.23521	-3.33361	-1.76916	-1.90412	-1.8079	-1.82706	-1.46959	-3.2157	-2.04798	-2.24442	1.50655	0.229539	1.08919	0.44794	Protein of unknown function (DUF1262) [Source:TAIR_LOCUS;Acc:AT1G13540]	F13B4.4	4635463	4636805	-1	1	UniProtKB Gene Name
AT1G13550	-2.58702	-3.75649	-2.77365	-3.03905	-0.787294	-1.90412	-1.09497	-1.26213	-1.09213	-1.55686	-2.83433	-1.82777	1.77693	0.0184786	1.21128	0.114025	Protein of unknown function (DUF1262) [Source:TAIR_LOCUS;Acc:AT1G13550]		4636984	4638330	-1	1
AT1G13560	6.46998	6.30465	6.41296	6.39587	5.92711	6.1934	6.27287	6.13113	6.07448	6.04618	6.04415	6.05494	-0.264738	0.342774	-0.340925	0.181429	aminoalcoholphosphotransferase 1 [Source:TAIR_LOCUS;Acc:AT1G13560]	AAPT1	4638514	4642104	-1	2	TAIR Gene Name
AT1G13570	4.06962	2.70186	3.39758	3.38969	3.52702	2.86845	3.46892	3.28813	3.67736	3.10469	3.92733	3.56979	-0.101554	0.8971	0.180106	0.782889	F-box/RNI-like superfamily protein [Source:TAIR_LOCUS;Acc:AT1G13570]		4642346	4644422	-1	1
AT1G13580	3.3089	2.20724	2.26503	2.59372	2.23431	2.36422	2.71586	2.43813	2.30302	2.06133	2.46323	2.27586	-0.155596	0.852322	-0.317864	0.607261	LAG1 longevity assurance homolog 3 [Source:TAIR_LOCUS;Acc:AT1G13580]	LAG13	4644521	4647007	-1	3	TAIR Gene Name
AT1G13630	1.75897	2.28835	-1.06037	0.995651	0.77589	1.51224	1.4931	1.26041	0.988671	1.78751	1.13002	1.30207	0.264759	0.902695	0.306417	0.883243	Tetratricopeptide repeat (TPR)-like superfamily protein [Source:TAIR_LOCUS;Acc:AT1G13630]		4669784	4672957	-1	2
AT1G13640	4.26715	5.68447	4.53582	4.82915	4.62139	5.32386	4.78143	4.90889	4.3983	5.50627	4.87434	4.92631	0.0797439	0.928437	0.0971603	0.909418	Phosphatidylinositol 3- and 4-kinase family protein [Source:TAIR_LOCUS;Acc:AT1G13640]	F21F23.8	4677027	4679812	-1	1	UniProtKB Gene Name
AT1G13650	6.67757	-0.243463	6.03433	4.15615	6.75533	0.523833	4.71435	3.99784	4.60669	-0.426855	1.81763	1.99916	-0.15831	0.963688	-2.15699	0.161333	BEST Arabidopsis thaliana protein match is: 18S pre-ribosomal assembly protein gar2-related (TAIR:AT2G03810.4); Has 3688 Blast hits to 1629 proteins in 255 species: Archae - 22; Bacteria - 222; Metazoa - 684; Fungi - 292; Plants - 62; Viruses - 14; /.../Eukaryotes - 2392 (source: NCBI BLink). [Source:TAIR_LOCUS;Acc:AT1G13650]	F21F23.9	4680432	4682196	-1	2	UniProtKB Gene Name
AT1G13690	3.64467	3.83805	4.66883	4.05052	4.65328	4.03229	3.60453	4.0967	3.70056	3.76736	3.68979	3.71924	0.0461841	0.976744	-0.331279	0.758531	ATPase E1 [Source:TAIR_LOCUS;Acc:AT1G13690]	ATE1	4693289	4694410	1	1	TAIR Gene Name
AT1G13700	3.44744	-2.04974	4.1046	1.8341	4.38388	0.868904	4.05474	3.10251	4.15249	0.844812	3.89605	2.96445	1.26841	0.199288	1.13035	0.27066	6-phosphogluconolactonase 1 [Source:TAIR_LOCUS;Acc:AT1G13700]	PGL1	4694372	4696023	-1	1	TAIR Gene Name
AT1G13730	4.14757	4.42766	4.53361	4.36961	4.93374	4.37384	3.89422	4.4006	3.7481	4.07495	3.86408	3.89571	0.030988	0.981918	-0.473905	0.522368	Nuclear transport factor 2 (NTF2) family protein with RNA binding (RRM-RBD-RNP motifs) domain [Source:TAIR_LOCUS;Acc:AT1G13730]	F21F23.16	4709824	4712550	1	1	UniProtKB Gene Name
AT1G13740	2.44003	3.08996	4.3895	3.3065	2.83432	3.21642	3.43293	3.16122	2.50299	2.80259	3.49466	2.93341	-0.145272	0.929714	-0.373083	0.765352	ABI five binding protein 2 [Source:TAIR_LOCUS;Acc:AT1G13740]	AFP2	4713674	4715407	1	1	TAIR Gene Name
AT1G13750	5.87638	4.01968	4.94569	4.94725	4.78589	4.11719	5.41669	4.77326	5.5357	4.60666	5.80251	5.31496	-0.173993	0.855086	0.367706	0.596839	Purple acid phosphatases superfamily protein [Source:TAIR_LOCUS;Acc:AT1G13750]	PAP1	4715394	4718235	-1	1	UniProtKB Gene Name
AT1G13770	4.45845	3.47158	2.36571	3.43191	2.50446	3.24424	3.76752	3.17207	3.34711	3.52449	4.02397	3.63186	-0.259843	0.913329	0.199943	0.936401	Protein of unknown function, DUF647 [Source:TAIR_LOCUS;Acc:AT1G13770]	RUS3	4721695	4724510	1	2	TAIR Gene Name
AT1G13780	3.09321	2.68355	2.53113	2.7693	2.36057	2.46254	2.50655	2.44322	2.58079	2.43962	2.57712	2.53251	-0.326082	0.467469	-0.236788	0.653895	F-box/RNI-like/FBD-like domains-containing protein [Source:TAIR_LOCUS;Acc:AT1G13780]		4724608	4726499	1	1
AT1G13790	2.42222	1.84391	1.83159	2.03257	0.92443	1.40462	0.929033	1.08603	1.1762	1.13519	0.411601	0.907664	-0.946543	0.101044	-1.12491	0.0474946	XH/XS domain-containing protein [Source:TAIR_LOCUS;Acc:AT1G13790]		4727438	4730425	1	1
AT1G13810	2.61749	3.50574	2.469	2.86408	3.15254	3.4788	2.39863	3.00999	2.50831	3.2549	2.35382	2.70568	0.145915	0.824441	-0.1584	0.804137	Restriction endonuclease, type II-like superfamily protein [Source:TAIR_LOCUS;Acc:AT1G13810]		4734036	4735389	1	1
AT1G13820	6.03912	4.88462	6.04699	5.65691	5.39267	4.93673	5.67759	5.33566	5.29081	4.58766	4.96276	4.94708	-0.321246	0.55541	-0.709833	0.0825489	alpha/beta-Hydrolases superfamily protein [Source:TAIR_LOCUS;Acc:AT1G13820]		4735547	4737808	1	1
AT1G13830	-1.85002	1.24763	-1.8424	-0.814931	1.19954	2.60919	1.01285	1.60719	1.94988	3.34606	1.59498	2.29697	2.42212	0.0148463	3.11191	0.00305354	Carbohydrate-binding X8 domain superfamily protein [Source:TAIR_LOCUS;Acc:AT1G13830]		4739873	4741038	-1	1
AT1G13860	5.27756	5.31698	4.28839	4.96098	3.96017	4.99581	5.02025	4.65874	4.42487	4.83794	4.79584	4.68622	-0.302232	0.769735	-0.274762	0.798504	QUASIMODO2 LIKE 1 [Source:TAIR_LOCUS;Acc:AT1G13860]	QUL1	4743205	4746956	-1	4	TAIR Gene Name
AT1G13870	3.81816	3.7133	4.23238	3.92128	4.14997	3.81136	3.60453	3.85529	3.66088	3.56411	3.57895	3.60132	-0.065992	0.95409	-0.319963	0.661373	calmodulin binding;purine nucleotide binding [Source:TAIR_LOCUS;Acc:AT1G13870]	DRL1	4747265	4748642	-1	1	TAIR Gene Name
AT1G13880	4.44529	4.72621	4.28315	4.48488	4.12302	4.48243	4.73049	4.44531	4.76138	4.75226	4.6378	4.71715	-0.039568	0.971727	0.232268	0.763651	ELM2 domain-containing protein [Source:TAIR_LOCUS;Acc:AT1G13880]		4748873	4751212	1	1
AT1G13900	4.6581	4.77849	4.42091	4.61917	4.12075	4.48678	4.85687	4.48813	4.33039	4.71362	4.99712	4.68038	-0.131036	0.842362	0.0612074	0.938622	Purple acid phosphatases superfamily protein [Source:TAIR_LOCUS;Acc:AT1G13900]	PAP2	4753145	4755580	-1	1	UniProtKB Gene Name
AT1G13910	3.13026	2.75979	2.28573	2.72526	2.14072	2.46254	2.70583	2.43636	2.3864	2.52279	2.65411	2.5211	-0.288899	0.760072	-0.204158	0.850226	Leucine-rich repeat (LRR) family protein [Source:TAIR_LOCUS;Acc:AT1G13910]	AT1G13910/F16A14_5	4755784	4757991	1	1	UniProtKB Gene Name
AT1G13920	1.93677	2.09373	3.16906	2.39985	3.00936	1.50068	0.802851	1.77096	1.16262	0.813823	0.383932	0.78679	-0.628889	0.685837	-1.61306	0.123252	Remorin family protein [Source:TAIR_LOCUS;Acc:AT1G13920]	F7A19.1	4758188	4759754	1	1	UniProtKB Gene Name
AT1G13930	9.52353	11.0424	11.9379	10.8346	11.3441	10.8644	10.8581	11.0222	9.98406	10.0924	10.3443	10.1403	0.187616	0.920236	-0.69433	0.549982	Involved in response to salt stress. Knockout mutants are hypersensitive to salt stress. [Source:TAIR_LOCUS;Acc:AT1G13930]	F7A19.2	4761012	4762666	1	3	UniProtKB Gene Name
AT1G13940	4.2369	4.28866	3.235	3.92019	3.57724	3.94838	4.46267	3.9961	3.97601	4.33343	4.47658	4.26201	0.0759086	0.95067	0.341819	0.664884	Plant protein of unknown function (DUF863) [Source:TAIR_LOCUS;Acc:AT1G13940]	F7A19.3	4762703	4766749	-1	1	UniProtKB Gene Name
AT1G13950	3.9566	4.43583	4.74166	4.37803	5.06683	4.87622	3.80319	4.58208	4.08906	4.77516	3.73945	4.20122	0.204047	0.875472	-0.176807	0.896219	eukaryotic elongation factor 5A-1 [Source:TAIR_LOCUS;Acc:AT1G13950]	EIF-5A	4773576	4774867	1	1	TAIR Gene Name
AT1G13960	4.44087	5.23144	4.43755	4.70329	4.64538	5.08058	4.9145	4.88015	4.90092	5.09031	4.83942	4.94355	0.176862	0.684484	0.240263	0.519782	WRKY DNA-binding protein 4 [Source:TAIR_LOCUS;Acc:AT1G13960]	WRKY4	4776463	4779400	1	2	TAIR Gene Name
AT1G13970	0.973873	1.74108	0.982084	1.23235	1.59297	2.40806	1.73922	1.91342	1.37756	2.75892	1.76511	1.9672	0.681074	0.227927	0.734851	0.183112	Protein of unknown function (DUF1336) [Source:TAIR_LOCUS;Acc:AT1G13970]	F7A19.6	4779523	4782542	-1	1	UniProtKB Gene Name
AT1G13980	5.81911	5.41084	4.94234	5.39076	4.60192	4.73847	5.85778	5.06606	5.45192	5.27309	5.99693	5.57398	-0.324706	0.804765	0.18322	0.906145	sec7 domain-containing protein [Source:TAIR_LOCUS;Acc:AT1G13980]	GN/GNOM	4788463	4794654	1	2	TAIR Gene Name
AT1G13990	5.35941	6.47764	6.64502	6.16069	6.62935	6.81127	6.66254	6.70105	6.61062	6.45619	6.62012	6.56231	0.540367	0.410173	0.401625	0.597377	unknown protein; FUNCTIONS IN: molecular_function unknown; INVOLVED IN: biological_process unknown; LOCATED IN: chloroplast; EXPRESSED IN: 23 plant structures; EXPRESSED DURING: 13 growth stages; CONTAINS InterPro DOMAIN/s: Protein of unknown functi /.../3110 (InterPro:IPR021503); Has 25 Blast hits to 25 proteins in 8 species: Archae - 0; Bacteria - 0; Metazoa - 0; Fungi - 0; Plants - 25; Viruses…		4794756	4796597	1	3
AT1G14000	6.19893	6.00752	6.4964	6.23428	6.14168	6.06007	6.14179	6.11451	6.04899	5.95768	6.10095	6.03587	-0.119772	0.766619	-0.19841	0.533117	VH1-interacting kinase [Source:TAIR_LOCUS;Acc:AT1G14000]	VIK	4797358	4800283	1	1	TAIR Gene Name
AT1G14010	4.60908	4.23031	5.79312	4.8775	6.10004	4.7968	4.75254	5.21646	4.91376	4.56268	4.58604	4.68749	0.338958	0.834123	-0.190008	0.919819	emp24/gp25L/p24 family/GOLD family protein [Source:TAIR_LOCUS;Acc:AT1G14010]		4800169	4801850	-1	1
AT1G14020	3.45622	3.20333	3.28258	3.31404	2.78991	3.14442	3.26906	3.0678	2.84289	3.00298	3.13904	2.99497	-0.246247	0.648256	-0.319073	0.499956	O-fucosyltransferase family protein [Source:TAIR_LOCUS;Acc:AT1G14020]		4802720	4805375	1	1
AT1G14030	6.26205	5.25004	6.28218	5.93142	6.0322	5.03487	5.96754	5.6782	5.6563	4.89173	5.53235	5.36013	-0.253218	0.875851	-0.571293	0.627454	Rubisco methyltransferase family protein [Source:TAIR_LOCUS;Acc:AT1G14030]	LSMT-L	4805306	4807517	-1	1	UniProtKB Gene Name
AT1G14040	1.64073	1.85216	0.645929	1.3796	0.753383	1.90309	1.97467	1.54371	1.53308	1.74725	1.81763	1.69932	0.164111	0.915647	0.319716	0.801658	EXS (ERD1/XPR1/SYG1) family protein [Source:TAIR_LOCUS;Acc:AT1G14040]	PHO1;H3	4810488	4814543	1	1	UniProtKB Gene Name
AT1G14060	2.94308	3.83805	3.5612	3.44744	4.66585	4.15053	3.07248	3.96295	3.41056	3.93827	3.20344	3.51742	0.51551	0.627561	0.0699808	0.968305	GCK domain-containing protein [Source:TAIR_LOCUS;Acc:AT1G14060]	F7A19.14	4817144	4818020	-1	1	UniProtKB Gene Name
AT1G14070	-0.660925	0.828598	-2.47982	-0.770715	0.336302	1.10155	0.579124	0.672325	2.06312	2.08087	2.48285	2.20895	1.44304	0.107647	2.97966	0.00191695	fucosyltransferase 7 [Source:TAIR_LOCUS;Acc:AT1G14070]	FUT7	4818548	4820150	1	1	TAIR Gene Name
AT1G14130	2.10251	2.84047	4.23509	3.05936	2.67257	4.00621	2.97569	3.21816	3.02779	3.64239	2.88779	3.18599	0.158803	0.928374	0.126633	0.945361	2-oxoglutarate (2OG) and Fe(II)-dependent oxygenase superfamily protein [Source:TAIR_LOCUS;Acc:AT1G14130]	F7A19.21	4835724	4837616	-1	1	UniProtKB Gene Name
AT1G14140	3.48224	3.12085	4.29362	3.63224	4.13656	3.36314	3.19934	3.56635	3.17822	3.24632	3.20737	3.21064	-0.0658906	0.962379	-0.4216	0.614966	Mitochondrial substrate carrier family protein [Source:TAIR_LOCUS;Acc:AT1G14140]	PUMP3	4837927	4839633	-1	1	UniProtKB Gene Name
AT1G14150	6.05317	6.18499	6.99239	6.41018	6.2031	6.06441	6.13854	6.13535	5.67948	5.64354	5.20534	5.50945	-0.274834	0.902224	-0.90073	0.521175	PsbQ-like 2 [Source:TAIR_LOCUS;Acc:AT1G14150]	PQL1	4839853	4840751	1	2	TAIR Gene Name
AT1G14170	5.24415	4.01605	5.02692	4.76237	3.94745	4.47369	5.04527	4.4888	4.87085	4.36006	5.6405	4.95714	-0.273569	0.757876	0.194764	0.847114	RNA-binding KH domain-containing protein [Source:TAIR_LOCUS;Acc:AT1G14170]	F7A19.25	4843234	4845847	-1	3	UniProtKB Gene Name
AT1G14180	2.07997	0.631009	2.60732	1.77277	1.75029	1.03884	1.06089	1.28334	0.988671	0.290283	0.59168	0.623545	-0.489427	0.664953	-1.14922	0.143701	RING/U-box superfamily protein [Source:TAIR_LOCUS;Acc:AT1G14180]	AT1G14175/AT1G14180	4847162	4849207	1	2	UniProtKB Gene Name
AT1G14190	1.18576	-0.473514	2.1902	0.967482	0.424103	-0.247594	-0.475896	-0.0997957	0.539355	-1.07463	0.17374	-0.120512	-1.06728	0.410386	-1.08799	0.397301	Glucose-methanol-choline (GMC) oxidoreductase family protein [Source:TAIR_LOCUS;Acc:AT1G14190]	F7A19.28	4852802	4854307	1	1	UniProtKB Gene Name
AT1G14200	4.1938	4.235	6.19799	4.8756	5.89709	4.65079	4.81208	5.11999	4.87287	4.50186	4.82291	4.73255	0.244387	0.897227	-0.143052	0.945969	RING/U-box superfamily protein [Source:TAIR_LOCUS;Acc:AT1G14200]	F7A19.29	4854384	4855200	-1	1	UniProtKB Gene Name
AT1G14205	3.0397	1.57154	2.9049	2.50538	2.77859	1.11681	2.81245	2.23595	2.72015	1.62811	2.26593	2.20473	-0.26943	0.772697	-0.300651	0.734936	Ribosomal L18p/L5e family protein [Source:TAIR_LOCUS;Acc:AT1G14205]		4855533	4856930	1	1
AT1G14210	3.14119	2.44889	3.5612	3.05043	3.4501	2.66183	2.54079	2.88424	3.07139	3.15449	3.44561	3.22383	-0.166185	0.841627	0.173403	0.832428	Ribonuclease T2 family protein [Source:TAIR_LOCUS;Acc:AT1G14210]	F7A19.31	4856778	4857964	-1	1	UniProtKB Gene Name
AT1G14230	4.24368	4.07137	3.95805	4.09103	4.1938	4.02232	4.5478	4.25464	4.35533	4.12243	4.63635	4.37137	0.163607	0.812578	0.280334	0.604539	GDA1/CD39 nucleoside phosphatase family protein [Source:TAIR_LOCUS;Acc:AT1G14230]	APY4	4861266	4864094	1	1	UniProtKB Gene Name
AT1G14250	6.40609	1.62067	6.6138	4.88019	5.04165	5.22868	4.40813	4.89282	3.52177	1.8723	3.37749	2.92385	0.0126299	0.997542	-1.95634	0.258435	GDA1/CD39 nucleoside phosphatase family protein [Source:TAIR_LOCUS;Acc:AT1G14250]	APY5	4868452	4871488	1	1	UniProtKB Gene Name
AT1G14260	-0.879116	-1.2921	-0.353354	-0.841523	-0.205007	-0.0293105	-1.40779	-0.547369	-0.298848	-0.187436	-0.572031	-0.352772	0.294154	0.830463	0.488751	0.659154	RING/FYVE/PHD zinc finger superfamily protein [Source:TAIR_LOCUS;Acc:AT1G14260]	F14L17.2	4872856	4874907	1	2	UniProtKB Gene Name
AT1G14270	5.74998	5.35969	6.16131	5.75699	5.73849	5.29859	5.69413	5.57707	5.30732	5.19275	5.31737	5.27248	-0.179922	0.849626	-0.484511	0.427072	CAAX amino terminal protease family protein [Source:TAIR_LOCUS;Acc:AT1G14270]	F14L17.3	4874875	4877248	-1	4	UniProtKB Gene Name
AT1G14280	5.84441	3.46625	6.3081	5.20625	5.30342	2.33855	5.32079	4.32092	4.52644	2.94043	5.89332	4.4534	-0.885336	0.370138	-0.752857	0.480044	phytochrome kinase substrate 2 [Source:TAIR_LOCUS;Acc:AT1G14280]	PKS2	4877627	4879149	1	1	TAIR Gene Name
AT1G14290	5.17137	2.10756	5.33761	4.20551	3.80534	2.50352	4.13904	3.48263	4.25751	2.04152	4.08923	3.46275	-0.722883	0.45646	-0.742758	0.43855	sphingoid base hydroxylase 2 [Source:TAIR_LOCUS;Acc:AT1G14290]	SBH2	4880051	4881964	-1	1	TAIR Gene Name
AT1G14300	3.60048	4.02873	2.50483	3.37801	3.22549	4.02831	3.51842	3.59074	3.75919	3.87677	3.83392	3.82329	0.212729	0.859579	0.445284	0.615256	ARM repeat superfamily protein [Source:TAIR_LOCUS;Acc:AT1G14300]	F14L17.6	4882376	4884791	-1	2	UniProtKB Gene Name
AT1G14310	3.99727	3.29643	4.56644	3.95338	4.12302	3.29166	3.69594	3.70354	3.71886	3.31904	3.42888	3.48893	-0.249839	0.620468	-0.464452	0.221673	Haloacid dehalogenase-like hydrolase (HAD) superfamily protein [Source:TAIR_LOCUS;Acc:AT1G14310]	F14L17.7	4885044	4886793	1	1	UniProtKB Gene Name
AT1G14320	7.89214	7.18918	8.67719	7.9195	9.23746	8.1239	8.09415	8.48517	8.01079	7.77139	8.40111	8.0611	0.565667	0.58586	0.141596	0.932175	Ribosomal protein L16p/L10e family protein [Source:TAIR_LOCUS;Acc:AT1G14320]	SAC52	4888214	4889661	1	2	TAIR Gene Name
AT1G14330	3.08191	2.82802	3.6202	3.17671	3.57064	4.02232	3.68067	3.75788	4.37984	3.80477	4.34213	4.17558	0.581165	0.441933	0.998865	0.111439	Galactose oxidase/kelch repeat superfamily protein [Source:TAIR_LOCUS;Acc:AT1G14330]	F14L17.10	4890118	4892251	-1	1	UniProtKB Gene Name
AT1G14340	3.78137	3.792	3.72384	3.76573	4.07931	4.25636	4.13344	4.15637	4.22123	4.18638	4.21929	4.20896	0.390638	0.280026	0.44323	0.201121	RNA-binding (RRM/RBD/RNP motifs) family protein [Source:TAIR_LOCUS;Acc:AT1G14340]	F14L17.11	4897346	4898961	1	1	UniProtKB Gene Name
AT1G14345	5.43612	5.20706	6.77754	5.80691	5.8053	5.15971	5.42434	5.46312	4.96209	4.92502	4.96855	4.95189	-0.34379	0.832979	-0.855019	0.426633	NAD(P)-linked oxidoreductase superfamily protein [Source:TAIR_LOCUS;Acc:AT1G14345]		4899145	4899979	1	1
AT1G14350	2.82603	3.05838	1.65298	2.51246	1.26493	2.50928	1.57255	1.78225	1.8938	2.84876	2.95015	2.56424	-0.730212	0.529645	0.0517721	0.980866	Duplicated homeodomain-like superfamily protein [Source:TAIR_LOCUS;Acc:AT1G14350]	FLP	4907953	4911168	1	2	TAIR Gene Name
AT1G14360	4.71895	3.86862	4.79632	4.4613	5.19209	4.52112	4.36584	4.69301	4.66405	4.44084	4.49112	4.532	0.231716	0.851557	0.0707078	0.963263	UDP-galactose transporter 3 [Source:TAIR_LOCUS;Acc:AT1G14360]	ATUTR3	4911093	4913152	-1	1	TAIR Gene Name
AT1G14370	3.92532	4.35626	3.85269	4.04476	4.98492	5.29365	4.94779	5.07545	5.5068	5.65695	5.1382	5.43398	1.0307	0.00654127	1.38923	0.000866971	protein kinase 2A [Source:TAIR_LOCUS;Acc:AT1G14370]	APK2A	4915576	4918138	1	1	TAIR Gene Name
AT1G14380	5.22201	5.09146	4.74933	5.02093	5.42001	4.93355	5.32651	5.22669	5.09104	4.92413	5.18463	5.0666	0.205759	0.697031	0.0456674	0.95439	IQ-domain 28 [Source:TAIR_LOCUS;Acc:AT1G14380]	IQD28	4918010	4921596	-1	3	TAIR Gene Name
AT1G14400	6.68413	6.51414	6.49814	6.56547	6.39643	6.73209	6.89447	6.67433	6.86074	6.62056	6.85946	6.78025	0.108861	0.885106	0.214781	0.714588	ubiquitin carrier protein 1 [Source:TAIR_LOCUS;Acc:AT1G14400]	UBC1	4927011	4928690	-1	2	TAIR Gene Name
AT1G14410	4.20947	3.6036	4.26996	4.02768	3.95764	3.92715	3.82649	3.90376	3.61519	4.00739	3.73129	3.78463	-0.123916	0.848917	-0.243049	0.620503	ssDNA-binding transcriptional regulator [Source:TAIR_LOCUS;Acc:AT1G14410]	ATWHY1	4929123	4930904	-1	1	TAIR Gene Name
AT1G14440	2.23765	2.07274	1.27592	1.8621	1.19954	1.23336	0.979903	1.1376	1.35389	1.43863	0.773181	1.18857	-0.724501	0.209076	-0.673532	0.254378	homeobox protein 31 [Source:TAIR_LOCUS;Acc:AT1G14440]	AtHB31	4938824	4940903	-1	2	TAIR Gene Name
AT1G14450	4.54742	4.86663	4.93226	4.7821	5.31651	5.29365	5.15784	5.256	4.98472	4.87433	5.03398	4.96434	0.473896	0.28492	0.182241	0.792222	NADH dehydrogenase (ubiquinone)s [Source:TAIR_LOCUS;Acc:AT1G14450]		4946218	4947576	-1	1
AT1G14460	4.58393	3.65833	2.78573	3.676	2.59093	3.26814	3.73833	3.19913	3.56798	3.19966	3.26131	3.34298	-0.476865	0.59949	-0.333017	0.75625	AAA-type ATPase family protein [Source:TAIR_LOCUS;Acc:AT1G14460]	F14L17.24	4948748	4952927	-1	1	UniProtKB Gene Name
AT1G14470	1.19977	1.53097	-3.63432	-0.301194	-0.493728	0.634216	0.840044	0.326844	0.621452	1.14766	0.567294	0.7788	0.628038	0.806542	1.07999	0.589096	Pentatricopeptide repeat (PPR) superfamily protein [Source:TAIR_LOCUS;Acc:AT1G14470]	PCMP-A4	4954080	4955702	1	1	UniProtKB Gene Name
AT1G14480	1.54521	2.07977	0.878376	1.50112	1.73877	2.21699	1.38405	1.77994	1.80964	1.80331	1.24198	1.61831	0.278816	0.664298	0.117188	0.894609	Ankyrin repeat family protein [Source:TAIR_LOCUS;Acc:AT1G14480]	F14L17.26	4956257	4958076	1	2	UniProtKB Gene Name
AT1G14510	5.00182	4.98344	5.19261	5.05929	5.57157	5.12394	4.73665	5.14406	5.07795	5.00543	5.08916	5.05751	0.0847653	0.930086	-0.00177711	0.99872	alfin-like 7 [Source:TAIR_LOCUS;Acc:AT1G14510]	AL7	4961886	4964428	-1	1	TAIR Gene Name
AT1G14520	2.53701	4.97321	4.19659	3.90227	1.66769	4.84948	3.03294	3.18337	2.65936	4.61552	3.46871	3.58119	-0.718903	0.153433	-0.321078	0.652296	myo-inositol oxygenase 1 [Source:TAIR_LOCUS;Acc:AT1G14520]	MIOX1	4968142	4970311	-1	2	TAIR Gene Name
AT1G14530	2.24442	3.25991	2.56548	2.68994	2.19251	3.36314	2.21285	2.5895	2.14765	3.20557	2.3609	2.57138	-0.10044	0.902239	-0.118562	0.879615	Protein of unknown function (DUF1084) [Source:TAIR_LOCUS;Acc:AT1G14530]	THH1	4970858	4973726	-1	2	TAIR Gene Name
AT1G14540	-1.53966	-4.97214	-4.3823	-3.63137	-0.342256	-0.32842	-1.8079	-0.826193	2.33336	1.73083	0.751707	1.6053	2.80518	0.0741975	5.23667	0.00205894	Peroxidase superfamily protein [Source:TAIR_LOCUS;Acc:AT1G14540]	PER4	4974067	4975705	-1	1	UniProtKB Gene Name
AT1G14560	3.84515	4.1922	4.43519	4.15751	4.12075	4.11344	3.97776	4.07065	3.85736	4.239	4.14144	4.07927	-0.0868602	0.896522	-0.0782421	0.909043	Mitochondrial substrate carrier family protein [Source:TAIR_LOCUS;Acc:AT1G14560]	AT1G14560	4980672	4983284	1	1	UniProtKB Gene Name
AT1G14570	5.30455	5.61215	5.29612	5.40427	5.16566	5.45353	5.72665	5.44861	5.54961	5.59812	5.70972	5.61915	0.0443358	0.962767	0.214877	0.74165	UBX domain-containing protein [Source:TAIR_LOCUS;Acc:AT1G14570]	T5E21.7	4983535	4987375	1	4	UniProtKB Gene Name
AT1G14580	4.57455	5.35182	4.77395	4.90011	3.8606	4.59281	4.57556	4.34299	4.34657	4.54424	4.26141	4.38407	-0.55712	0.464462	-0.516035	0.514912	C2H2-like zinc finger protein [Source:TAIR_LOCUS;Acc:AT1G14580]		4989562	4992732	1	2
AT1G14590	3.27291	3.53911	4.18259	3.66487	3.68507	3.4788	2.76013	3.308	2.80458	3.22318	3.03226	3.02	-0.356874	0.73135	-0.644867	0.408527	Nucleotide-diphospho-sugar transferase family protein [Source:TAIR_LOCUS;Acc:AT1G14590]		4998816	5000643	-1	1
AT1G14600	2.68875	2.07977	1.12505	1.96452	2.50446	2.86397	2.23394	2.53412	2.2339	2.62373	1.5707	2.14278	0.569601	0.412759	0.178255	0.875884	Homeodomain-like superfamily protein [Source:TAIR_LOCUS;Acc:AT1G14600]		5001011	5003370	-1	1
AT1G14610	6.8615	6.69156	5.95603	6.50303	6.14453	6.34344	6.73129	6.40642	6.53381	6.56218	6.76162	6.6192	-0.0966085	0.927926	0.116172	0.910219	valyl-tRNA synthetase / valine--tRNA ligase (VALRS) [Source:TAIR_LOCUS;Acc:AT1G14610]	TWN2	5008244	5014533	-1	1	TAIR Gene Name
AT1G14620	3.746	3.90446	3.68484	3.77844	4.13206	4.09453	3.30933	3.84531	3.47401	3.85255	3.53586	3.6208	0.0668692	0.950642	-0.157631	0.861164	decoy [Source:TAIR_LOCUS;Acc:AT1G14620]	DECOY	5014753	5016604	-1	2	TAIR Gene Name
AT1G14640	2.60175	3.2256	1.12505	2.31746	1.07756	2.26549	3.04492	2.12932	2.69707	3.16667	3.26508	3.04294	-0.188144	0.9452	0.725478	0.691867	SWAP (Suppressor-of-White-APricot)/surp domain-containing protein [Source:TAIR_LOCUS;Acc:AT1G14640]		5023656	5025955	1	1
AT1G14650	5.71443	6.24818	5.6444	5.869	5.91518	5.85289	6.03899	5.93568	6.03294	6.17263	6.12801	6.11119	0.0666797	0.913516	0.242189	0.519215	SWAP (Suppressor-of-White-APricot)/surp domain-containing protein / ubiquitin family protein [Source:TAIR_LOCUS;Acc:AT1G14650]	AT1G14650	5027662	5031779	1	2	UniProtKB Gene Name
AT1G14660	3.77904	3.97732	3.38308	3.71315	3.29097	3.39139	3.56628	3.41621	3.4686	3.66184	3.57591	3.56879	-0.296934	0.644369	-0.14436	0.866292	Na+/H+ exchanger 8 [Source:TAIR_LOCUS;Acc:AT1G14660]	ATNHX8	5031950	5036477	-1	2	TAIR Gene Name
AT1G14670	6.80075	6.10198	4.73203	5.87825	4.36094	5.89473	6.5197	5.59179	5.95315	5.98468	6.51571	6.15118	-0.286464	0.914317	0.272928	0.918986	Endomembrane protein 70 protein family [Source:TAIR_LOCUS;Acc:AT1G14670]		5037612	5040528	1	1
AT1G14680	0.782382	0.0151663	0.795472	0.531007	1.63081	1.07054	0.232571	0.977971	0.660793	0.66543	0.205714	0.510646	0.446964	0.405501	-0.0203611	0.984966	unknown protein; BEST Arabidopsis thaliana protein match is: unknown protein (TAIR:AT4G09060.1); Has 8132 Blast hits to 6366 proteins in 685 species: Archae - 171; Bacteria - 671; Metazoa - 4046; Fungi - 445; Plants - 318; Viruses - 23; Other Eukary /.../ 2458 (source: NCBI BLink). [Source:TAIR_LOCUS;Acc:AT1G14680]		5040861	5041733	1	1
AT1G14685	5.94868	5.054	6.05797	5.68688	5.87878	4.74574	5.4289	5.35114	5.30059	4.81219	5.37507	5.16262	-0.335743	0.563737	-0.524264	0.267437	basic pentacysteine 2 [Source:TAIR_LOCUS;Acc:AT1G14685]	BPC2	5042323	5044294	1	3	TAIR Gene Name
AT1G14687	-0.7659	1.14371	1.35562	0.577811	1.98316	1.47726	-0.570433	0.96333	0.0970639	0.267534	-0.807454	-0.147619	0.385519	0.882631	-0.72543	0.726054	homeobox protein 32 [Source:TAIR_LOCUS;Acc:AT1G14687]	AtHB32	5047803	5048612	1	1	TAIR Gene Name
AT1G14690	6.1127	5.50989	5.4742	5.69893	6.14396	5.23385	5.76449	5.7141	6.13546	5.40305	6.05015	5.86289	0.0151691	0.985035	0.163956	0.772669	microtubule-associated protein 65-7 [Source:TAIR_LOCUS;Acc:AT1G14690]	MAP65-7	5051760	5055252	-1	2	TAIR Gene Name
AT1G14700	4.32262	3.17418	4.32968	3.94216	4.41762	2.66699	3.34204	3.47555	3.65852	2.7097	3.02336	3.13053	-0.466608	0.870832	-0.811632	0.727259	purple acid phosphatase 3 [Source:TAIR_LOCUS;Acc:AT1G14700]	PAP3	5058680	5061136	1	2	TAIR Gene Name
AT1G14710	5.16513	5.03802	6.46478	5.55598	6.48113	5.22954	5.55129	5.75398	5.46534	5.15007	5.36196	5.32579	0.198007	0.873892	-0.230186	0.846853	hydroxyproline-rich glycoprotein family protein [Source:TAIR_LOCUS;Acc:AT1G14710]	AT1G14710	5061866	5065178	-1	2	UniProtKB Gene Name
AT1G14720	5.34135	5.34679	6.53978	5.74264	6.61786	5.6835	5.72912	6.01016	5.34414	5.15689	5.28902	5.26335	0.267519	0.852212	-0.479291	0.672042	xyloglucan endotransglucosylase/hydrolase 28 [Source:TAIR_LOCUS;Acc:AT1G14720]	XTH28/XTR2	5066636	5068645	-1	1	TAIR Gene Name
AT1G14740	5.95799	5.68334	6.22613	5.95582	6.46339	5.78716	6.3809	6.21048	6.4646	6.04374	6.52239	6.34358	0.254664	0.505277	0.38776	0.224298	Protein of unknown function (DUF1423) [Source:TAIR_LOCUS;Acc:AT1G14740]	OBE3	5075213	5077791	-1	1	UniProtKB Gene Name
AT1G14770	2.70848	2.98563	2.63995	2.77802	2.27495	2.64101	1.8886	2.26819	2.04118	2.54168	2.18035	2.25441	-0.509835	0.229384	-0.523615	0.213208	RING/FYVE/PHD zinc finger superfamily protein [Source:TAIR_LOCUS;Acc:AT1G14770]	AT1G14770/F10B6_2	5086626	5088846	-1	2	UniProtKB Gene Name
AT1G14780	-0.385277	-1.62148	-2.23521	-1.41399	1.07756	2.32554	2.06376	1.82228	0.539355	0.860058	1.02659	0.808667	3.23627	0.000411283	2.22266	0.00560995	MAC/Perforin domain-containing protein [Source:TAIR_LOCUS;Acc:AT1G14780]		5090990	5094152	1	1
AT1G14790	5.74938	5.61872	5.70033	5.68948	5.5741	5.27371	5.61415	5.48732	5.49115	5.62566	5.54864	5.55515	-0.202156	0.591082	-0.134328	0.767695	RNA-dependent RNA polymerase 1 [Source:TAIR_LOCUS;Acc:AT1G14790]	RDR1	5093961	5098032	-1	1	TAIR Gene Name
AT1G14810	5.55464	4.8535	6.61327	5.6738	6.30194	5.6485	5.44403	5.79816	5.46401	5.41952	5.88236	5.58863	0.124353	0.930805	-0.0851761	0.955054	semialdehyde dehydrogenase family protein [Source:TAIR_LOCUS;Acc:AT1G14810]	ASDH	5102424	5104695	-1	1	UniProtKB Gene Name
AT1G14820	3.89551	4.10768	4.25397	4.08572	4.24264	4.62341	3.94194	4.26933	3.46318	4.13175	3.61192	3.73561	0.183613	0.809903	-0.350103	0.536482	Sec14p-like phosphatidylinositol transfer family protein [Source:TAIR_LOCUS;Acc:AT1G14820]	AT1G14820/F10B6_7	5105018	5106954	-1	3	UniProtKB Gene Name
AT1G14830	5.75295	5.7823	5.07051	5.53526	5.00366	5.54223	5.82985	5.45858	5.35139	5.50152	5.78298	5.5453	-0.0766756	0.9482	0.0100443	0.993845	DYNAMIN-like 1C [Source:TAIR_LOCUS;Acc:AT1G14830]	ADL1C	5107421	5111670	-1	1	TAIR Gene Name
AT1G14840	5.05674	4.68343	4.47028	4.73681	4.41762	4.24098	4.31569	4.32476	4.1938	4.14253	3.72309	4.01981	-0.412053	0.374559	-0.717006	0.0706112	microtubule-associated proteins 70-4 [Source:TAIR_LOCUS;Acc:AT1G14840]	MAP70-4	5111955	5115497	-1	2	TAIR Gene Name
AT1G14850	4.6338	5.02006	3.38793	4.34726	3.60334	4.25806	4.66999	4.17713	4.52515	4.80254	4.58151	4.6364	-0.170134	0.907751	0.289137	0.818646	nucleoporin 155 [Source:TAIR_LOCUS;Acc:AT1G14850]	NUP155	5116696	5123259	-1	1	TAIR Gene Name
AT1G14860	-1.28439	-3.75649	-5.99094	-3.67728	0.585322	-1.07501	-0.522389	-0.337358	-0.417753	-1.47722	-1.4396	-1.11152	3.33992	0.05458	2.56575	0.15576	nudix hydrolase homolog 18 [Source:TAIR_LOCUS;Acc:AT1G14860]	atnudt18	5124742	5126151	1	1	TAIR Gene Name
AT1G14870	0.425103	-0.243463	1.41268	0.53144	4.14104	3.48463	2.37351	3.33306	5.59728	3.91507	5.05261	4.85498	2.80162	0.0145513	4.32354	0.000838412	PLANT CADMIUM RESISTANCE 2 [Source:TAIR_LOCUS;Acc:AT1G14870]	PCR2	5128375	5129523	-1	1	TAIR Gene Name
AT1G14880	7.47157	6.44319	7.73308	7.21595	8.95428	7.74511	7.89251	8.1973	8.05492	8.05043	7.99816	8.0345	0.981356	0.389444	0.818557	0.510692	PLANT CADMIUM RESISTANCE 1 [Source:TAIR_LOCUS;Acc:AT1G14880]	PCR1	5132535	5133716	-1	1	TAIR Gene Name
AT1G14890	1.9861	0.894198	4.13106	2.33712	4.58879	1.07054	2.76013	2.80648	3.34119	1.13519	3.80311	2.75983	0.469366	0.793449	0.422715	0.821313	Plant invertase/pectin methylesterase inhibitor superfamily protein [Source:TAIR_LOCUS;Acc:AT1G14890]		5137014	5137957	1	1
AT1G14900	0.247698	1.66819	1.3361	1.08399	1.59297	2.0764	0.664551	1.44464	0.925632	1.94525	0.895702	1.25553	0.360646	0.699303	0.171533	0.888648	high mobility group A [Source:TAIR_LOCUS;Acc:AT1G14900]	HMGA	5138334	5139432	-1	1	TAIR Gene Name
AT1G14910	5.16067	5.48854	4.62582	5.09167	4.8507	4.90895	5.43346	5.06437	5.39765	5.34784	5.40861	5.3847	-0.0273046	0.984294	0.293029	0.758046	ENTH/ANTH/VHS superfamily protein [Source:TAIR_LOCUS;Acc:AT1G14910]		5139712	5143689	-1	1
AT1G14920	4.44234	5.42181	5.99244	5.28553	4.85345	4.83706	5.07959	4.92337	4.92161	5.29112	5.52374	5.24549	-0.362164	0.512574	-0.0400403	0.968565	GRAS family transcription factor family protein [Source:TAIR_LOCUS;Acc:AT1G14920]	GAI	5149226	5151354	1	1	TAIR Gene Name
AT1G14970	2.36742	1.86035	1.0069	1.74489	0.559656	1.31495	1.62674	1.16711	1.41234	1.24364	1.11329	1.25642	-0.577779	0.595244	-0.488472	0.679627	O-fucosyltransferase family protein [Source:TAIR_LOCUS;Acc:AT1G14970]	T15D22.1	5161949	5164917	-1	1	UniProtKB Gene Name
AT1G14980	4.88096	5.89172	6.8111	5.86126	7.42179	6.35056	5.24507	6.33914	5.33977	6.01991	5.35492	5.57154	0.477881	0.835018	-0.289724	0.912507	chaperonin 10 [Source:TAIR_LOCUS;Acc:AT1G14980]	CPN10	5165628	5166745	-1	1	TAIR Gene Name
AT1G14990	3.2596	3.7356	4.30401	3.7664	4.30799	4.12653	3.26906	3.90119	3.56545	3.84122	3.50746	3.63805	0.134791	0.899573	-0.128356	0.905498	unknown protein; FUNCTIONS IN: molecular_function unknown; INVOLVED IN: biological_process unknown; LOCATED IN: endomembrane system; EXPRESSED IN: 22 plant structures; EXPRESSED DURING: 13 growth stages; Has 34 Blast hits to 34 proteins in 12 specie /.../hae - 0; Bacteria - 0; Metazoa - 0; Fungi - 0; Plants - 34; Viruses - 0; Other Eukaryotes - 0 (source: NCBI BLink). [Source:TAIR_LOCUS;Acc:AT1G1…	AT1G14990/T15D22_3	5167031	5168264	-1	2	UniProtKB Gene Name
AT1G15000	2.40418	3.44744	4.54023	3.46395	5.24566	3.35997	3.62328	4.0763	4.13053	3.4393	3.45885	3.67623	0.61235	0.659935	0.212275	0.916143	serine carboxypeptidase-like 50 [Source:TAIR_LOCUS;Acc:AT1G15000]	scpl50	5168596	5170066	1	1	TAIR Gene Name
AT1G15010	1.1429	-2.66301	0.407033	-0.371027	3.3727	-0.653673	1.3197	1.34624	3.12753	-2.15858	1.5707	0.846547	1.71727	0.21989	1.21757	0.450087	unknown protein; BEST Arabidopsis thaliana protein match is: unknown protein (TAIR:AT2G01300.1); Has 71 Blast hits to 71 proteins in 13 species: Archae - 0; Bacteria - 2; Metazoa - 0; Fungi - 0; Plants - 69; Viruses - 0; Other Eukaryotes - 0 (source /.../ BLink). [Source:TAIR_LOCUS;Acc:AT1G15010]	T15D22.5	5171207	5171742	1	1	UniProtKB Gene Name
AT1G15020	4.17974	3.48745	4.13978	3.93565	4.19164	3.47294	4.05277	3.90578	4.30349	3.67892	4.30417	4.09552	-0.0298702	0.967592	0.159872	0.754571	quiescin-sulfhydryl oxidase 1 [Source:TAIR_LOCUS;Acc:AT1G15020]	ATQSOX1	5173097	5176223	-1	2	TAIR Gene Name
AT1G15030	5.22715	4.89452	4.79262	4.97143	4.99619	4.46195	5.08346	4.8472	5.14972	4.79477	5.19058	5.04502	-0.12423	0.839436	0.0735922	0.917142	Protein of unknown function (DUF789) [Source:TAIR_LOCUS;Acc:AT1G15030]	T15D22.8	5177529	5180049	1	1	UniProtKB Gene Name
AT1G15040	-4.17206	-6.54837	-5.99094	-5.57046	-0.99664	-1.22224	-2.75032	-1.6564	2.57066	-1.92878	0.915145	0.519008	3.91406	0.0839398	6.08947	0.00822576	Class I glutamine amidotransferase-like superfamily protein [Source:TAIR_LOCUS;Acc:AT1G15040]	AT1G15045	5179887	5181389	-1	2	UniProtKB Gene Name
AT1G15060	5.03444	4.80708	4.39924	4.74692	4.42132	4.55327	4.85913	4.61124	4.89297	4.85392	4.60845	4.78511	-0.13568	0.857964	0.0381935	0.967411	Uncharacterised conserved protein UCP031088, alpha/beta hydrolase [Source:TAIR_LOCUS;Acc:AT1G15060]	F9L1.1	5183607	5186974	-1	1	UniProtKB Gene Name
AT1G15080	2.24442	1.30895	2.05229	1.86855	2.85064	1.95478	1.99128	2.26557	1.95772	1.30052	1.36009	1.53944	0.397014	0.754582	-0.32911	0.811247	lipid phosphate phosphatase 2 [Source:TAIR_LOCUS;Acc:AT1G15080]	ATPAP2	5187626	5189673	1	1	TAIR Gene Name
AT1G15100	1.02197	4.55563	2.41357	2.66372	3.01421	4.37071	2.41719	3.26737	2.30914	4.10047	2.87301	3.09421	0.603648	0.536023	0.430487	0.708091	RING-H2 finger A2A [Source:TAIR_LOCUS;Acc:AT1G15100]	RHA2A	5193426	5194203	-1	1	TAIR Gene Name
AT1G15110	1.71088	3.54417	2.32627	2.5271	3.3727	3.43726	2.4536	3.08785	3.14122	3.55489	3.01889	3.23833	0.560749	0.533835	0.71123	0.375144	phosphatidyl serine synthase family protein [Source:TAIR_LOCUS;Acc:AT1G15110]	F9L1.4	5199018	5202175	1	2	UniProtKB Gene Name
AT1G15120	6.83313	6.06538	7.55261	6.81704	7.39395	6.54728	6.2993	6.74684	6.53979	6.53583	6.76824	6.61462	-0.0701991	0.964429	-0.202418	0.87849	Ubiquinol-cytochrome C reductase hinge protein [Source:TAIR_LOCUS;Acc:AT1G15120]		5202648	5204193	1	2
AT1G15125	5.08626	5.84214	5.20944	5.37928	7.43504	6.13495	5.93901	6.503	9.81669	8.7451	9.6867	9.41617	1.12372	0.377016	4.03689	0.000962985	S-adenosyl-L-methionine-dependent methyltransferases superfamily protein [Source:TAIR_LOCUS;Acc:AT1G15125]	F9L1.6	5204625	5205912	1	1	UniProtKB Gene Name
AT1G15130	5.86928	6.22339	5.70928	5.93399	5.57578	5.62119	6.47367	5.89021	6.01352	6.06838	6.35682	6.14624	-0.0437725	0.971727	0.212253	0.818837	Endosomal targeting BRO1-like domain-containing protein [Source:TAIR_LOCUS;Acc:AT1G15130]		5206002	5209915	-1	1
AT1G15140	5.71931	6.21399	6.84801	6.26044	6.35808	6.09163	6.25841	6.23604	6.03831	5.95291	5.92395	5.97172	-0.0243963	0.982434	-0.288711	0.677864	FAD/NAD(P)-binding oxidoreductase [Source:TAIR_LOCUS;Acc:AT1G15140]	F9L1.8	5210206	5212349	-1	3	UniProtKB Gene Name
AT1G15165	2.04935	2.16819	0.0756535	1.43107	1.69177	1.26108	2.15505	1.70263	1.29294	1.79543	1.74356	1.61064	0.271565	0.871124	0.179576	0.922502	RING/FYVE/PHD zinc finger superfamily protein [Source:TAIR_LOCUS;Acc:AT1G15165]		5217719	5220113	-1	1
AT1G15170	2.11735	3.69976	1.9654	2.59417	2.40524	2.90381	2.89858	2.73588	3.14802	3.62266	3.15133	3.30734	0.141712	0.911675	0.713171	0.287499	MATE efflux family protein [Source:TAIR_LOCUS;Acc:AT1G15170]	F9L1.11	5220641	5222973	1	1	UniProtKB Gene Name
AT1G15175	3.08946	-0.964607	3.14068	1.75518	2.63546	-1.22224	1.85269	1.08863	1.94201	-1.0173	1.21087	0.711859	-0.666541	0.360177	-1.04332	0.100929	other RNA [Source:TAIR_LOCUS;Acc:AT1G15175]		5222913	5224121	-1	1
AT1G15180	4.0942	3.57172	4.73782	4.13458	4.37818	3.01306	4.32062	3.90395	4.1675	3.23768	3.80829	3.73783	-0.230625	0.794145	-0.396753	0.563908	MATE efflux family protein [Source:TAIR_LOCUS;Acc:AT1G15180]	F9L1.12	5224385	5226702	1	2	UniProtKB Gene Name
AT1G15200	5.85219	6.25813	6.51253	6.20762	6.70305	6.14273	5.74447	6.19675	5.89507	6.1554	5.68117	5.91054	-0.0108693	0.992836	-0.297075	0.687749	protein-protein interaction regulator family protein [Source:TAIR_LOCUS;Acc:AT1G15200]		5228300	5231184	-1	4
AT1G15215	3.42376	3.60117	3.37822	3.46772	3.67894	3.85925	3.20291	3.58037	3.46318	3.82215	3.08877	3.45803	0.112648	0.860576	-0.00968529	0.990671	BEST Arabidopsis thaliana protein match is: sequence-specific DNA binding transcription factors;sequence-specific DNA binding (TAIR:AT3G18380.1); Has 89 Blast hits to 86 proteins in 16 species: Archae - 0; Bacteria - 0; Metazoa - 0; Fungi - 0; Plant /.../; Viruses - 0; Other Eukaryotes - 0 (source: NCBI BLink). [Source:TAIR_LOCUS;Acc:AT1G15215]	F9L1.16	5238065	5240051	1	3	UniProtKB Gene Name
AT1G15220	2.48648	2.82802	2.857	2.72384	2.57143	2.86845	2.72581	2.7219	2.84709	2.91896	2.69952	2.82186	-0.00193899	0.997879	0.0980199	0.861682	cytochrome c biogenesis protein family [Source:TAIR_LOCUS;Acc:AT1G15220]	ATCCMH	5240029	5241538	-1	2	TAIR Gene Name
AT1G15230	3.75077	4.48391	5.69633	4.64367	5.97581	4.61284	4.47303	5.02056	4.79917	4.74925	4.5103	4.68624	0.376893	0.78804	0.0425694	0.98263	unknown protein; FUNCTIONS IN: molecular_function unknown; INVOLVED IN: biological_process unknown; LOCATED IN: cellular_component unknown; EXPRESSED IN: 24 plant structures; EXPRESSED DURING: 15 growth stages; Has 26 Blast hits to 26 proteins in 12 /.../es: Archae - 0; Bacteria - 0; Metazoa - 0; Fungi - 0; Plants - 26; Viruses - 0; Other Eukaryotes - 0 (source: NCBI BLink). [Source:TAIR_LOCUS;Ac…	F9L1.18	5242198	5243227	-1	1	UniProtKB Gene Name
AT1G15240	5.85938	5.90787	5.44361	5.73695	5.44593	5.33191	5.96335	5.5804	5.59606	5.833	5.91919	5.78275	-0.156557	0.804686	0.0457941	0.956276	Phox-associated domain;Phox-like;Sorting nexin, C-terminal [Source:TAIR_LOCUS;Acc:AT1G15240]	AT1G15240/F9L1_19	5243450	5248604	1	3	UniProtKB Gene Name
AT1G15250	3.47362	3.34952	4.13688	3.65334	5.00242	4.08498	3.24504	4.11081	3.60045	3.66827	3.4017	3.55681	0.457476	0.736256	-0.0965323	0.961246	Zinc-binding ribosomal protein family protein [Source:TAIR_LOCUS;Acc:AT1G15250]	RPL37A	5248664	5249474	-1	1	UniProtKB Gene Name
AT1G15260	5.5594	5.76466	4.91189	5.41198	5.28919	5.11276	5.06498	5.15564	5.05766	5.07838	4.61584	4.91729	-0.256341	0.882282	-0.494693	0.715591	unknown protein; BEST Arabidopsis thaliana protein match is: unknown protein (TAIR:AT3G16070.1); Has 28 Blast hits to 28 proteins in 7 species: Archae - 0; Bacteria - 0; Metazoa - 0; Fungi - 0; Plants - 28; Viruses - 0; Other Eukaryotes - 0 (source: /.../BLink). [Source:TAIR_LOCUS;Acc:AT1G15260]	F9L1.20	5249760	5250573	1	1	UniProtKB Gene Name
AT1G15270	6.91237	6.58994	7.54527	7.01586	7.66194	7.16189	7.00481	7.27622	6.88414	6.92676	7.03663	6.94918	0.260352	0.762154	-0.066686	0.955987	Translation machinery associated TMA7 [Source:TAIR_LOCUS;Acc:AT1G15270]	F9L1.21	5250650	5252121	-1	1	UniProtKB Gene Name
AT1G15280	5.82872	6.48807	5.60233	5.97304	5.88966	6.08214	6.06856	6.01345	6.00257	6.38831	5.87623	6.08903	0.0404101	0.952207	0.115993	0.826501	CASC3/Barentsz eIF4AIII binding [Source:TAIR_LOCUS;Acc:AT1G15280]	AT1G15280	5252315	5256753	1	2	UniProtKB Gene Name
AT1G15290	7.12783	5.39978	5.80802	6.11188	6.49104	5.41917	6.76358	6.2246	6.42564	5.71807	6.18513	6.10961	0.112718	0.925976	-0.00226695	0.998715	Tetratricopeptide repeat (TPR)-like superfamily protein [Source:TAIR_LOCUS;Acc:AT1G15290]	F9L1.23	5257046	5264942	-1	1	UniProtKB Gene Name
AT1G15300	0.135582	1.22234	-1.2777	0.0267435	-0.0795364	0.850749	1.10738	0.626198	1.13506	1.47859	1.50813	1.37393	0.599454	0.67203	1.34718	0.173483	transposable element gene [Source:TAIR_LOCUS;Acc:AT1G15300]		5265726	5268602	-1	1
AT1G15310	1.58845	3.47689	2.34612	2.47048	3.0045	3.40068	2.99228	3.13249	2.61076	3.55257	2.28841	2.81725	0.662004	0.260309	0.346763	0.663786	signal recognition particle 54 kDa subunit [Source:TAIR_LOCUS;Acc:AT1G15310]	ATHSRP54A	5269019	5272058	-1	1	TAIR Gene Name
AT1G15340	6.42149	7.0665	7.1347	6.87423	7.44068	6.91323	7.19676	7.18356	6.79683	6.64085	6.66732	6.70166	0.309326	0.503696	-0.172566	0.777657	methyl-CPG-binding domain 10 [Source:TAIR_LOCUS;Acc:AT1G15340]	MBD10	5275677	5277689	-1	2	TAIR Gene Name
AT1G15350	4.31459	3.97732	5.1188	4.47024	4.89549	4.49111	4.36584	4.58415	4.64162	4.3758	4.84948	4.6223	0.113908	0.857145	0.152064	0.790001	unknown protein; BEST Arabidopsis thaliana protein match is: unknown protein (TAIR:AT3G15770.2); Has 148 Blast hits to 148 proteins in 25 species: Archae - 0; Bacteria - 0; Metazoa - 0; Fungi - 0; Plants - 141; Viruses - 0; Other Eukaryotes - 7 (sou /.../CBI BLink). [Source:TAIR_LOCUS;Acc:AT1G15350]	F9L1.29	5278260	5279877	-1	3	UniProtKB Gene Name
AT1G15370	4.78665	4.64286	5.1262	4.8519	5.21375	5.10901	4.53655	4.9531	4.757	4.75226	4.66798	4.72575	0.101199	0.905107	-0.126155	0.874707	SNARE-like superfamily protein [Source:TAIR_LOCUS;Acc:AT1G15370]	F9L1.32	5287047	5288577	1	1	UniProtKB Gene Name
AT1G15380	-4.17206	-3.75649	-4.3823	-4.10362	0.819891	5.20693	1.02904	2.35195	4.96778	3.5687	4.86197	4.46615	6.45557	0.00324537	8.56977	0.000440136	Lactoylglutathione lyase / glyoxalase I family protein [Source:TAIR_LOCUS;Acc:AT1G15380]	F9L1.33	5290745	5292535	1	2	UniProtKB Gene Name
AT1G15390	4.10541	3.58897	5.42927	4.37455	5.18003	3.94416	4.03087	4.38502	3.87783	3.51024	3.90575	3.76461	0.0104711	0.996078	-0.609942	0.588836	peptide deformylase 1A [Source:TAIR_LOCUS;Acc:AT1G15390]	PDF1A	5294629	5295797	1	1	TAIR Gene Name
AT1G15400	4.09232	5.33596	6.25647	5.22825	6.38489	5.50996	5.33221	5.74235	5.47333	5.51042	5.54013	5.50796	0.514103	0.678322	0.279709	0.859479	unknown protein; FUNCTIONS IN: molecular_function unknown; INVOLVED IN: biological_process unknown; LOCATED IN: plasma membrane; EXPRESSED IN: 23 plant structures; EXPRESSED DURING: 13 growth stages; BEST Arabidopsis thaliana protein match is: unkno /.../tein (TAIR:AT1G80180.1); Has 82 Blast hits to 82 proteins in 16 species: Archae - 0; Bacteria - 4; Metazoa - 0; Fungi - 0; Plants - 75; Viruses …		5295773	5296902	-1	3
AT1G15405	-3.32402	4.36342	7.59836	2.87925	2.96503	2.64101	0.314168	1.9734	3.83868	2.60141	2.76505	3.06838	-0.90585	0.894879	0.189128	0.981593	other RNA [Source:TAIR_LOCUS;Acc:AT1G15405]		5297875	5298166	-1	1
AT1G15410	4.22153	5.9595	3.35365	4.51156	3.63847	5.55329	3.55795	4.2499	3.81338	5.79036	3.4017	4.33515	-0.261658	0.897124	-0.176416	0.935899	aspartate-glutamate racemase family [Source:TAIR_LOCUS;Acc:AT1G15410]	F9L1.36	5298324	5300927	1	1	UniProtKB Gene Name
AT1G15415	-3.0345	-4.97214	-3.14164	-3.7161	-0.60419	-0.208828	-2.99107	-1.26803	-1.0273	-0.909081	-0.234786	-0.723723	2.44807	0.0472514	2.99237	0.016193	The protein encoded by this gene was identified as a part of pollen proteome by mass spec analysis. It has weak homology to LEA (late embryo abundant) proteins. Encodes protein phosphatase 2A (PP2A) B'gamma subunit. Targeted to nucleus and cytosol. [Source:TAIR_LOCUS;Acc:AT1G15415]	F9L1.37	5300742	5301412	-1	1	UniProtKB Gene Name
AT1G15420	3.64467	3.93367	4.44227	4.00687	4.92591	4.43368	3.37403	4.24454	3.77894	4.17291	3.72856	3.89347	0.23767	0.865317	-0.113399	0.945363	CONTAINS InterPro DOMAIN/s: Small-subunit processome, Utp12 (InterPro:IPR007148); Has 764 Blast hits to 656 proteins in 193 species: Archae - 0; Bacteria - 42; Metazoa - 237; Fungi - 154; Plants - 85; Viruses - 23; Other Eukaryotes - 223 (source: NC /.../nk). [Source:TAIR_LOCUS;Acc:AT1G15420]	AT1G15425	5301613	5303390	-1	1	UniProtKB Gene Name
AT1G15430	2.0338	2.53316	3.36353	2.64349	3.12141	3.14811	2.81245	3.02732	3.2776	2.95808	3.18761	3.1411	0.383831	0.653337	0.497604	0.506164	Protein of unknown function (DUF1644) [Source:TAIR_LOCUS;Acc:AT1G15430]	F9L1.39	5304317	5306012	1	2	UniProtKB Gene Name
AT1G15440	3.54394	4.98437	2.75623	3.76151	3.62897	4.7152	3.90301	4.08239	4.1424	4.79087	4.24242	4.39189	0.320881	0.705776	0.63038	0.305756	periodic tryptophan protein 2 [Source:TAIR_LOCUS;Acc:AT1G15440]	PWP2	5306061	5309514	-1	2	TAIR Gene Name
AT1G15470	3.96277	4.05907	4.24051	4.08745	3.92945	3.94627	3.80319	3.89297	3.84285	3.90604	3.85159	3.86683	-0.194478	0.65385	-0.220624	0.587433	Transducin/WD40 repeat-like superfamily protein [Source:TAIR_LOCUS;Acc:AT1G15470]	F9L1.42	5315507	5317863	1	1	UniProtKB Gene Name
AT1G15480	3.26294	4.01787	2.71848	3.3331	3.43204	3.71299	3.26224	3.46909	3.38207	3.5456	3.07162	3.3331	0.135991	0.872908	-8.5127e-07	1	Tetratricopeptide repeat (TPR)-like superfamily protein [Source:TAIR_LOCUS;Acc:AT1G15480]		5318011	5320594	1	1
AT1G15490	2.83504	3.62765	1.95256	2.80508	2.29089	3.02113	3.04492	2.78565	2.64495	3.19669	2.98264	2.94143	-0.0194347	0.987083	0.136345	0.891417	alpha/beta-Hydrolases superfamily protein [Source:TAIR_LOCUS;Acc:AT1G15490]	F9L1.44	5320615	5323895	-1	1	UniProtKB Gene Name
AT1G15500	7.15774	7.06824	6.86972	7.0319	7.04698	6.90895	7.33283	7.09626	7.37008	7.10605	7.52034	7.33216	0.0643561	0.930249	0.300259	0.475608	TLC ATP/ADP transporter [Source:TAIR_LOCUS;Acc:AT1G15500]	ATNTT2	5326290	5328874	1	1	TAIR Gene Name
AT1G15510	3.51622	4.93632	2.21198	3.55484	3.40637	4.6326	3.61795	3.88564	3.37051	4.36664	3.00088	3.57934	0.330799	0.842079	0.0245009	0.991067	Tetratricopeptide repeat (TPR)-like superfamily protein [Source:TAIR_LOCUS;Acc:AT1G15510]	ATECB2	5329111	5331711	1	1	TAIR Gene Name
AT1G15520	-0.93924	0.234218	-4.3823	-1.69577	1.81757	3.89251	2.82176	2.84395	5.94507	5.76039	6.60466	6.10337	4.53972	0.0397133	7.79915	0.00144105	pleiotropic drug resistance 12 [Source:TAIR_LOCUS;Acc:AT1G15520]	PDR12	5331858	5338326	-1	1	TAIR Gene Name
AT1G15530	3.28282	4.1922	4.13688	3.87063	4.69373	3.70302	4.62952	4.34209	4.68498	3.92225	4.38085	4.32936	0.471459	0.438702	0.458728	0.456854	Concanavalin A-like lectin protein kinase family protein [Source:TAIR_LOCUS;Acc:AT1G15530]	LECRKS1	5339961	5341931	-1	1	UniProtKB Gene Name
AT1G15550	1.5231	-0.392662	1.41268	0.847707	2.31449	-0.879119	2.15505	1.19681	1.98097	-1.55686	1.402	0.608706	0.349099	0.814383	-0.239001	0.886448	gibberellin 3-oxidase 1 [Source:TAIR_LOCUS;Acc:AT1G15550]	GA3OX1	5344478	5346166	-1	1	TAIR Gene Name
AT1G15570	1.73031	-2.18026	0.905	0.151681	-0.205007	-0.81935	-0.671608	-0.565322	-0.154316	-1.64119	-0.518738	-0.771413	-0.717003	0.624365	-0.923095	0.472757	CYCLIN A2;3 [Source:TAIR_LOCUS;Acc:AT1G15570]	CYCA2;3	5362009	5365549	1	1	TAIR Gene Name
AT1G15580	1.00611	-0.604035	2.72611	1.04273	1.80657	-0.458897	1.67896	1.00888	1.18965	-1.92878	0.0733208	-0.221937	-0.0338545	0.987886	-1.26467	0.18884	indole-3-acetic acid inducible 5 [Source:TAIR_LOCUS;Acc:AT1G15580]	IAA5	5365665	5366497	-1	1	TAIR Gene Name
AT1G15660	3.80447	2.96307	3.71225	3.49326	2.77859	2.63575	3.16317	2.85917	3.01668	2.5969	3.28382	2.9658	-0.634091	0.0729274	-0.527464	0.148362	centromere protein C [Source:TAIR_LOCUS;Acc:AT1G15660]	CENP-C	5381170	5385254	1	1	TAIR Gene Name
AT1G15670	0.300649	1.20953	1.23437	0.914853	3.7479	4.2097	3.60183	3.85314	3.94533	3.3514	4.35633	3.88435	2.93829	0.00243906	2.9695	0.00227188	Galactose oxidase/kelch repeat superfamily protein [Source:TAIR_LOCUS;Acc:AT1G15670]		5389952	5391490	1	1
AT1G15690	8.60538	8.73567	8.54034	8.62713	8.97194	8.70631	9.06491	8.91438	8.5476	8.63145	8.82901	8.66935	0.287254	0.540934	0.0422218	0.959409	Inorganic H pyrophosphatase family protein [Source:TAIR_LOCUS;Acc:AT1G15690]	AVP1	5398990	5402733	1	2	TAIR Gene Name
AT1G15700	2.08752	2.07274	3.07024	2.41017	3.10332	1.68565	1.74903	2.17933	1.76562	1.73083	1.52087	1.67244	-0.230833	0.87734	-0.737727	0.41861	ATPase, F1 complex, gamma subunit protein [Source:TAIR_LOCUS;Acc:AT1G15700]	ATPC2	5402569	5403818	-1	1	TAIR Gene Name
AT1G15710	3.83845	3.53657	4.37477	3.9166	3.73614	3.38828	3.58006	3.56816	3.293	3.57556	3.50107	3.45655	-0.348439	0.440027	-0.460051	0.251635	prephenate dehydrogenase family protein [Source:TAIR_LOCUS;Acc:AT1G15710]	TYRAAT2	5404358	5405686	1	1	UniProtKB Gene Name
AT1G15720	0.686162	0.25939	0.823632	0.589728	0.366158	0.716786	0.579124	0.554023	0.20788	-0.0959252	0.61566	0.242538	-0.0357048	0.960612	-0.34719	0.32084	TRF-like 5 [Source:TAIR_LOCUS;Acc:AT1G15720]	TRFL5	5406025	5407486	1	1	TAIR Gene Name
AT1G15730	5.83715	5.5715	6.83795	6.0822	6.60878	5.07579	5.76087	5.81514	5.60032	5.0542	5.58218	5.41223	-0.267058	0.792438	-0.66997	0.309882	Cobalamin biosynthesis CobW-like protein [Source:TAIR_LOCUS;Acc:AT1G15730]	F7H2.7	5407401	5409987	-1	1	UniProtKB Gene Name
AT1G15740	6.98116	6.2733	6.22752	6.494	6.23929	6.04549	7.56919	6.61799	7.42198	6.60495	7.70072	7.24255	0.123992	0.940144	0.748554	0.386874	Leucine-rich repeat family protein [Source:TAIR_LOCUS;Acc:AT1G15740]	AT1G15740	5410908	5414919	1	1	UniProtKB Gene Name
AT1G15750	5.73502	6.26232	4.60489	5.53408	4.97736	6.01388	6.25155	5.7476	6.18791	6.65369	6.67615	6.50591	0.213519	0.899321	0.971837	0.28458	Transducin family protein / WD-40 repeat family protein [Source:TAIR_LOCUS;Acc:AT1G15750]	TPL/WSIP1	5414817	5421033	-1	4	TAIR Gene Name
AT1G15780	5.38416	6.23352	4.53361	5.38376	4.48285	5.63751	6.25198	5.45744	5.76696	6.09261	6.22423	6.02793	0.0736852	0.96855	0.644174	0.534391	unknown protein; BEST Arabidopsis thaliana protein match is: unknown protein (TAIR:AT2G10440.1); Has 103701 Blast hits to 43153 proteins in 1828 species: Archae - 30; Bacteria - 7385; Metazoa - 38639; Fungi - 11531; Plants - 7727; Viruses - 307; Oth /.../aryotes - 38082 (source: NCBI BLink). [Source:TAIR_LOCUS;Acc:AT1G15780]	MED15A	5430183	5436412	-1	1	UniProtKB Gene Name
AT1G15790	4.07533	4.15635	4.55993	4.26387	5.06564	4.75897	4.34502	4.72321	4.71581	5.02215	4.25952	4.66583	0.459342	0.502612	0.401959	0.583676	unknown protein; BEST Arabidopsis thaliana protein match is: unknown protein (TAIR:AT1G15780.1); Has 170 Blast hits to 94 proteins in 14 species: Archae - 0; Bacteria - 0; Metazoa - 0; Fungi - 0; Plants - 170; Viruses - 0; Other Eukaryotes - 0 (sour /.../BI BLink). [Source:TAIR_LOCUS;Acc:AT1G15790]	F7H2.13	5438253	5440087	-1	2	UniProtKB Gene Name
AT1G15800	1.51192	2.27617	2.01568	1.93459	2.54501	2.98858	2.50655	2.68004	2.44866	2.58784	2.48285	2.50645	0.745456	0.0532043	0.571862	0.153658	unknown protein; BEST Arabidopsis thaliana protein match is: unknown protein (TAIR:AT1G80610.1); Has 56 Blast hits to 52 proteins in 9 species: Archae - 0; Bacteria - 0; Metazoa - 0; Fungi - 0; Plants - 56; Viruses - 0; Other Eukaryotes - 0 (source: /.../BLink). [Source:TAIR_LOCUS;Acc:AT1G15800]		5441082	5443684	-1	1
AT1G15810	4.10168	5.33958	4.16846	4.53657	4.81018	5.03882	4.48479	4.77793	4.4872	5.27797	4.52136	4.76218	0.241356	0.571895	0.225606	0.609898	S15/NS1, RNA-binding protein [Source:TAIR_LOCUS;Acc:AT1G15810]	F7H2.15	5444418	5446564	1	1	UniProtKB Gene Name
AT1G15820	10.6618	9.1181	13.9389	11.2396	13.0194	9.10467	11.4302	11.1847	11.2501	8.78783	10.9085	10.3155	-0.0548538	0.986702	-0.924107	0.631353	light harvesting complex photosystem II subunit 6 [Source:TAIR_LOCUS;Acc:AT1G15820]	LHCB6	5446462	5447859	-1	1	TAIR Gene Name
AT1G15830	1.91994	-0.473514	2.87085	1.43909	2.36057	-0.879119	3.22763	1.56969	1.97326	-0.464572	1.91723	1.14198	0.130602	0.930827	-0.297116	0.805889	unknown protein; Has 165982 Blast hits to 57214 proteins in 2459 species: Archae - 263; Bacteria - 44622; Metazoa - 55751; Fungi - 10656; Plants - 17613; Viruses - 2527; Other Eukaryotes - 34550 (source: NCBI BLink). [Source:TAIR_LOCUS;Acc:AT1G15830]		5448726	5450177	1	1
AT1G15860	5.03931	4.51893	4.68489	4.74771	4.68912	4.67131	4.81674	4.72572	4.72032	4.69599	4.77486	4.73039	-0.0219898	0.979826	-0.0173202	0.983814	Domain of unknown function (DUF298) [Source:TAIR_LOCUS;Acc:AT1G15860]	F7H2.19	5454785	5457022	1	3	UniProtKB Gene Name
AT1G15870	0.0140135	0.724207	-0.703647	0.0115246	1.21616	1.16163	-0.522389	0.618467	0.335289	0.244417	0.0382274	0.205978	0.606943	0.504423	0.194453	0.892705	Mitochondrial glycoprotein family protein [Source:TAIR_LOCUS;Acc:AT1G15870]	F7H2.20	5457084	5458429	1	1	UniProtKB Gene Name
AT1G15880	5.16603	4.90239	5.27092	5.11311	5.27379	4.73604	5.27076	5.09353	5.44178	4.98169	5.28994	5.2378	-0.0195842	0.980742	0.124692	0.84033	golgi snare 11 [Source:TAIR_LOCUS;Acc:AT1G15880]	GOS11	5458535	5460333	-1	1	TAIR Gene Name
AT1G15885	2.49787	1.6775	3.26162	2.479	3.00936	1.62305	2.11013	2.24751	2.13391	1.52701	1.76511	1.80868	-0.231484	0.867499	-0.670322	0.444565	unknown protein; Has 5 Blast hits to 5 proteins in 1 species: Archae - 0; Bacteria - 0; Metazoa - 0; Fungi - 0; Plants - 5; Viruses - 0; Other Eukaryotes - 0 (source: NCBI BLink). [Source:TAIR_LOCUS;Acc:AT1G15885]		5460477	5461281	1	1
AT1G15890	3.9504	3.52637	2.61555	3.3641	3.22549	2.93832	4.38792	3.51724	4.54056	3.68738	4.53078	4.25291	0.153142	0.914817	0.888803	0.214312	Disease resistance protein (CC-NBS-LRR class) family [Source:TAIR_LOCUS;Acc:AT1G15890]		5461317	5464223	1	1
AT1G15910	4.44822	3.87265	4.36487	4.22858	4.23846	3.80904	3.48659	3.8447	3.95306	3.53626	3.67	3.71977	-0.383883	0.341706	-0.508806	0.16513	XH/XS domain-containing protein [Source:TAIR_LOCUS;Acc:AT1G15910]	T24D18.1	5465336	5469125	1	1	UniProtKB Gene Name
AT1G15920	4.0848	3.71555	4.3066	4.03565	4.38766	3.80439	3.99636	4.06281	4.24342	3.75131	4.21929	4.07134	0.0271594	0.9696	0.035695	0.959178	Polynucleotidyl transferase, ribonuclease H-like superfamily protein [Source:TAIR_LOCUS;Acc:AT1G15920]	CAF1-2	5469389	5471149	1	2	UniProtKB Gene Name
AT1G15930	6.03863	5.29028	7.07662	6.13518	7.2955	6.34859	6.22598	6.62335	6.38907	5.8652	6.77088	6.34172	0.488176	0.625087	0.206543	0.8826	Ribosomal protein L7Ae/L30e/S12e/Gadd45 family protein [Source:TAIR_LOCUS;Acc:AT1G15930]	RPS12A	5471400	5473014	1	2	UniProtKB Gene Name
AT1G15940	5.19604	5.43066	4.53582	5.05417	4.58714	5.05353	4.89481	4.84516	4.90686	5.14855	4.84446	4.96662	-0.209014	0.690462	-0.0875477	0.902371	Tudor/PWWP/MBT superfamily protein [Source:TAIR_LOCUS;Acc:AT1G15940]	T24D18.4	5473565	5478259	1	1	UniProtKB Gene Name
AT1G15950	5.73863	6.24318	6.26056	6.08079	6.74139	7.00767	6.5104	6.75315	6.52875	6.56246	6.43554	6.50892	0.672362	0.23543	0.428127	0.536624	cinnamoyl coa reductase 1 [Source:TAIR_LOCUS;Acc:AT1G15950]	CCR1	5478754	5482180	1	2	TAIR Gene Name
AT1G15960	4.66569	3.79836	3.0941	3.85272	3.81096	3.85701	4.13344	3.9338	4.8119	4.5454	4.73605	4.69778	0.0810834	0.957292	0.845062	0.224978	NRAMP metal ion transporter 6 [Source:TAIR_LOCUS;Acc:AT1G15960]	NRAMP6	5481665	5485082	-1	1	TAIR Gene Name
AT1G15970	3.9211	3.46892	3.8025	3.73084	3.27891	3.47	3.53832	3.42908	3.26516	3.13602	3.30598	3.23572	-0.301762	0.334874	-0.495119	0.0710647	DNA glycosylase superfamily protein [Source:TAIR_LOCUS;Acc:AT1G15970]	T24D18.7	5486319	5488868	-1	1	UniProtKB Gene Name
AT1G15980	8.42676	7.45028	8.7564	8.21115	7.86941	6.91323	7.95867	7.58043	7.35348	6.80991	6.96726	7.04355	-0.630715	0.704732	-1.1676	0.344261	NDH-dependent cyclic electron flow 1 [Source:TAIR_LOCUS;Acc:AT1G15980]	NDF1	5489298	5491363	1	1	TAIR Gene Name
AT1G16000	3.05519	3.04413	3.60359	3.2343	4.08165	3.71547	2.66502	3.48738	2.69707	3.04981	2.5649	2.7706	0.253076	0.852343	-0.463707	0.662249	unknown protein; BEST Arabidopsis thaliana protein match is: unknown protein (TAIR:AT1G80890.1); Has 41 Blast hits to 40 proteins in 10 species: Archae - 0; Bacteria - 0; Metazoa - 0; Fungi - 0; Plants - 41; Viruses - 0; Other Eukaryotes - 0 (source /.../ BLink). [Source:TAIR_LOCUS;Acc:AT1G16000]	GAG1AT	5494533	5495359	1	1	UniProtKB Gene Name
AT1G16010	5.24753	5.71319	5.06744	5.34272	5.42746	5.6772	5.58579	5.56349	5.36722	5.75791	5.51903	5.54805	0.220765	0.498833	0.205331	0.54478	magnesium transporter 2 [Source:TAIR_LOCUS;Acc:AT1G16010]	MGT2	5495373	5497723	-1	3	TAIR Gene Name
AT1G16020	4.59987	4.72065	4.92041	4.74698	4.78445	4.65338	4.32717	4.58833	4.09954	4.46556	4.06781	4.21097	-0.158647	0.860024	-0.536007	0.308445	Protein of unknown function (DUF1712) [Source:TAIR_LOCUS;Acc:AT1G16020]	T24D18.12	5498165	5501358	1	2	UniProtKB Gene Name
AT1G16030	2.09504	3.36678	2.87085	2.77756	2.89328	3.11458	3.08413	3.03066	3.45773	3.45179	3.13491	3.34814	0.253107	0.616375	0.570587	0.116779	heat shock protein 70B [Source:TAIR_LOCUS;Acc:AT1G16030]	Hsp70b	5502206	5504535	-1	1	TAIR Gene Name
AT1G16040	3.2529	3.87063	4.2242	3.78257	4.91803	4.28498	3.54957	4.25086	3.60292	4.08776	3.56677	3.75248	0.468286	0.708806	-0.030091	0.987848	FUNCTIONS IN: molecular_function unknown; INVOLVED IN: GPI anchor biosynthetic process; LOCATED IN: integral to membrane, endoplasmic reticulum membrane; EXPRESSED IN: 24 plant structures; EXPRESSED DURING: 13 growth stages; CONTAINS InterPro DOMAIN /.../I biosynthesis protein Pig-F (InterPro:IPR009580); Has 280 Blast hits to 280 proteins in 133 species: Archae - 0; Bacteria - 0; Metazoa - 113; F…	AT1G16040/T24D18_15	5504735	5506611	1	1	UniProtKB Gene Name
AT1G16060	1.5231	1.96288	3.00255	2.16285	3.06179	3.88371	2.63891	3.1948	2.39218	2.98931	2.29582	2.5591	1.03196	0.0846764	0.396259	0.648097	ARIA-interacting double AP2 domain protein [Source:TAIR_LOCUS;Acc:AT1G16060]	ADAP	5508507	5511735	1	2	TAIR Gene Name
AT1G16080	6.73853	6.09473	7.50917	6.78081	6.81627	6.25168	6.36669	6.47821	5.84377	5.80488	5.58519	5.74461	-0.302599	0.77902	-1.0362	0.108398	unknown protein; LOCATED IN: apoplast, chloroplast stroma, chloroplast, chloroplast envelope; EXPRESSED IN: 23 plant structures; EXPRESSED DURING: 14 growth stages; Has 81 Blast hits to 81 proteins in 28 species: Archae - 0; Bacteria - 2; Metazoa - /.../gi - 0; Plants - 62; Viruses - 0; Other Eukaryotes - 17 (source: NCBI BLink). [Source:TAIR_LOCUS;Acc:AT1G16080]	T24D18.18	5514317	5516027	1	1	UniProtKB Gene Name
AT1G16090	1.81465	2.38227	2.29597	2.1643	2.37561	2.81372	2.32192	2.50375	3.4794	3.0531	2.41638	2.98296	0.339455	0.565904	0.81866	0.0610086	wall associated kinase-like 7 [Source:TAIR_LOCUS;Acc:AT1G16090]	WAKL7	5516259	5517822	1	1	TAIR Gene Name
AT1G16110	5.07775	4.08184	5.22333	4.79431	5.39553	4.15965	5.2338	4.92966	5.24635	4.25471	4.65369	4.71825	0.135352	0.812725	-0.0760582	0.910338	wall associated kinase-like 6 [Source:TAIR_LOCUS;Acc:AT1G16110]	WAKL6	5518373	5520891	1	1	TAIR Gene Name
AT1G16130	1.00611	0.308446	0.208859	0.507807	1.89233	1.95478	2.98815	2.27842	2.89243	1.84204	2.99634	2.57694	1.77062	0.00594164	2.06913	0.00210398	wall associated kinase-like 2 [Source:TAIR_LOCUS;Acc:AT1G16130]	WAKL2	5525491	5528212	1	1	TAIR Gene Name
AT1G16170	4.14396	2.25769	3.84208	3.41458	4.15441	2.69756	3.86975	3.57391	3.66797	2.04152	3.56982	3.0931	0.159333	0.861655	-0.321473	0.64055	unknown protein; FUNCTIONS IN: molecular_function unknown; INVOLVED IN: biological_process unknown; LOCATED IN: cellular_component unknown; EXPRESSED IN: 24 plant structures; EXPRESSED DURING: 15 growth stages; BEST Arabidopsis thaliana protein matc /.../unknown protein (TAIR:AT1G79660.1); Has 55 Blast hits to 55 proteins in 13 species: Archae - 0; Bacteria - 0; Metazoa - 0; Fungi - 0; Plants - 5…	T24D18.25	5538732	5539821	-1	1	UniProtKB Gene Name
AT1G16180	6.93427	7.12415	6.7956	6.95134	7.21288	7.41531	7.33222	7.32014	7.40786	7.63002	7.86361	7.63383	0.368796	0.367708	0.682489	0.0511321	Serinc-domain containing serine and sphingolipid biosynthesis protein [Source:TAIR_LOCUS;Acc:AT1G16180]	T24D18.26	5540427	5542902	1	2	UniProtKB Gene Name
AT1G16190	4.14033	4.34906	3.91479	4.13473	3.68201	4.48388	3.95256	4.03948	4.08027	4.11932	3.91538	4.03832	-0.0952427	0.919048	-0.0964035	0.918106	Rad23 UV excision repair protein family [Source:TAIR_LOCUS;Acc:AT1G16190]	RAD23A	5543152	5546103	1	1	TAIR Gene Name
AT1G16210	4.71895	6.09131	6.69392	5.83473	6.96552	6.28678	5.97381	6.4087	5.98644	6.16066	5.95161	6.0329	0.573978	0.623698	0.198178	0.908366	unknown protein; CONTAINS InterPro DOMAIN/s: Protein of unknown function DUF1014 (InterPro:IPR010422); Has 16107 Blast hits to 8386 proteins in 1107 species: Archae - 26; Bacteria - 3370; Metazoa - 4013; Fungi - 1516; Plants - 526; Viruses - 120; Ot /.../karyotes - 6536 (source: NCBI BLink). [Source:TAIR_LOCUS;Acc:AT1G16210]	F3O9.2	5546128	5547552	-1	1	UniProtKB Gene Name
AT1G16220	0.854989	0.987295	1.25529	1.03253	-0.342256	0.591077	-0.113712	0.0450362	-0.054785	0.844812	-0.323353	0.155558	-0.987489	0.02873	-0.876968	0.0521753	Protein phosphatase 2C family protein [Source:TAIR_LOCUS;Acc:AT1G16220]		5548653	5550553	1	1
AT1G16240	6.01456	5.86388	6.18228	6.02024	6.15248	5.91252	6.18832	6.08444	6.27226	5.93896	6.46113	6.22412	0.064196	0.924806	0.203874	0.659656	syntaxin of plants 51 [Source:TAIR_LOCUS;Acc:AT1G16240]	SYP51	5555007	5556841	-1	3	TAIR Gene Name
AT1G16250	3.61362	3.61327	3.34371	3.52353	3.55402	3.20938	3.86751	3.54364	3.768	3.4393	3.88629	3.69786	0.0201054	0.983513	0.174334	0.807817	Galactose oxidase/kelch repeat superfamily protein [Source:TAIR_LOCUS;Acc:AT1G16250]		5556989	5559520	1	1
AT1G16260	6.05124	4.68685	5.66805	5.46872	5.12738	4.49975	5.39428	5.00714	5.19563	4.72594	4.98804	4.96987	-0.461579	0.486868	-0.498847	0.434974	Wall-associated kinase family protein [Source:TAIR_LOCUS;Acc:AT1G16260]	WAKL8	5559579	5562113	-1	2	UniProtKB Gene Name
AT1G16270	4.91426	4.92671	3.98405	4.60834	3.90335	4.69279	5.16699	4.58771	4.73377	5.01298	5.18065	4.9758	-0.0206303	0.990762	0.367459	0.756048	Protein kinase superfamily protein with octicosapeptide/Phox/Bem1p domain [Source:TAIR_LOCUS;Acc:AT1G16270]	F3O9.7	5563087	5568368	1	2	UniProtKB Gene Name
AT1G16280	3.21546	3.71779	3.30836	3.41387	3.99274	3.45818	3.17775	3.54289	3.3293	3.76736	3.42213	3.50626	0.129019	0.872525	0.0923923	0.916078	RNA helicase 36 [Source:TAIR_LOCUS;Acc:AT1G16280]	RH36	5568482	5570487	-1	1	TAIR Gene Name
AT1G16300	1.69118	1.40192	1.77444	1.62251	1.6432	1.75538	1.66866	1.68908	2.16802	1.9873	2.65987	2.27173	0.0665712	0.935729	0.649218	0.0818695	glyceraldehyde-3-phosphate dehydrogenase of plastid 2 [Source:TAIR_LOCUS;Acc:AT1G16300]	GAPCP-2	5574310	5577622	1	1	TAIR Gene Name
AT1G16310	2.07997	1.73217	2.20113	2.00442	2.14072	2.09187	1.76844	2.00034	1.8856	1.92375	2.23539	2.01492	-0.00408143	0.997057	0.0104932	0.991999	Cation efflux family protein [Source:TAIR_LOCUS;Acc:AT1G16310]	MTP10	5578431	5580693	1	1	UniProtKB Gene Name
AT1G16320	6.35144	6.55843	5.06744	5.99244	4.92329	6.00286	6.18247	5.70287	5.67141	6.14024	5.71041	5.84069	-0.289568	0.844888	-0.151751	0.930367	Uncharacterized conserved protein (DUF2358) [Source:TAIR_LOCUS;Acc:AT1G16320]	F3O9.12	5580855	5582143	1	1	UniProtKB Gene Name
AT1G16340	4.15299	3.70202	3.8025	3.88584	3.9372	3.74734	3.66007	3.78153	3.88998	3.75333	3.45224	3.69852	-0.104301	0.946732	-0.187319	0.892513	Aldolase superfamily protein [Source:TAIR_LOCUS;Acc:AT1G16340]	ATKDSA2	5587790	5590651	-1	4	TAIR Gene Name
AT1G16350	5.17492	5.72319	4.84723	5.24845	5.86437	5.77542	5.59395	5.74458	5.65338	5.89534	5.29639	5.61504	0.496136	0.405522	0.366592	0.596721	Aldolase-type TIM barrel family protein [Source:TAIR_LOCUS;Acc:AT1G16350]	AT1G16350/F3O9_15	5590951	5593007	1	1	UniProtKB Gene Name
AT1G16370	-0.712458	-4.23924	1.0069	-1.31493	-2.21138	-1.78453	-0.898138	-1.63135	-0.224752	-5.07781	-1.54241	-2.28165	-0.316416	0.94592	-0.966723	0.780451	organic cation/carnitine transporter 6 [Source:TAIR_LOCUS;Acc:AT1G16370]	ATOCT6	5596694	5598447	1	1	TAIR Gene Name
AT1G16400	2.61749	2.15494	3.10588	2.6261	3.93977	4.14503	3.73587	3.94022	3.61763	4.10835	3.70653	3.81084	1.31412	0.0285869	1.18474	0.0483432	cytochrome P450, family 79, subfamily F, polypeptide 2 [Source:TAIR_LOCUS;Acc:AT1G16400]	CYP79F2	5605159	5607473	1	1	TAIR Gene Name
AT1G16410	8.39162	8.31874	8.17205	8.29414	8.99604	9.41637	9.2164	9.20961	8.75081	9.17468	9.09338	9.00629	0.915469	0.49606	0.712152	0.641293	cytochrome p450 79f1 [Source:TAIR_LOCUS;Acc:AT1G16410]	CYP79F1	5608807	5611426	1	2	TAIR Gene Name
AT1G16420	-4.17206	-2.86833	-3.63432	-3.55824	-0.00149531	-0.602444	-1.32299	-0.64231	0.8427	0.312677	-0.323353	0.277341	2.91593	0.0355394	3.83558	0.00736081	metacaspase 8 [Source:TAIR_LOCUS;Acc:AT1G16420]	ATMC8	5612150	5613867	-1	1	TAIR Gene Name
AT1G16430	2.06474	1.61098	2.39461	2.02344	2.11412	1.82188	1.18168	1.7059	1.13506	1.45875	1.72167	1.43849	-0.317549	0.757771	-0.58495	0.445727	Surfeit locus protein 5 subunit 22 of Mediator complex [Source:TAIR_LOCUS;Acc:AT1G16430]	MED22A	5614619	5615510	1	1	UniProtKB Gene Name
AT1G16445	2.01807	0.759855	2.1902	1.65604	2.32227	0.523833	1.13756	1.32789	1.70162	1.03139	1.94582	1.55961	-0.328154	0.817123	-0.0964316	0.958453	S-adenosyl-L-methionine-dependent methyltransferases superfamily protein [Source:TAIR_LOCUS;Acc:AT1G16445]	F3O9.25	5617811	5619334	1	1	UniProtKB Gene Name
AT1G16460	6.35614	6.39929	6.42639	6.39394	6.78612	6.64056	6.60823	6.6783	6.53223	6.60715	6.53837	6.55925	0.284364	0.67147	0.165309	0.843569	rhodanese homologue 2 [Source:TAIR_LOCUS;Acc:AT1G16460]	RDH2	5619582	5622663	-1	4	TAIR Gene Name
AT1G16470	6.05076	5.92144	6.7761	6.24943	6.61209	6.01887	5.84985	6.16027	5.73084	5.90165	5.97989	5.87079	-0.0891651	0.948414	-0.378642	0.672567	proteasome subunit PAB1 [Source:TAIR_LOCUS;Acc:AT1G16470]	PAB1	5622786	5625643	1	2	TAIR Gene Name
AT1G16480	1.82372	2.16819	1.03131	1.67441	1.21616	1.83114	1.983	1.67677	1.54356	2.07439	1.61886	1.74561	0.00235862	0.998432	0.0711979	0.949576	Tetratricopeptide repeat (TPR)-like superfamily protein [Source:TAIR_LOCUS;Acc:AT1G16480]		5625699	5628656	-1	2
AT1G16500	2.10251	4.57548	3.88751	3.52183	4.54869	4.70155	3.29268	4.18097	3.45226	4.97054	3.51699	3.97993	0.659139	0.564749	0.458095	0.736147	unknown protein; BEST Arabidopsis thaliana protein match is: unknown protein (TAIR:AT1G79160.1); Has 136 Blast hits to 134 proteins in 17 species: Archae - 0; Bacteria - 0; Metazoa - 0; Fungi - 4; Plants - 131; Viruses - 1; Other Eukaryotes - 0 (sou /.../CBI BLink). [Source:TAIR_LOCUS;Acc:AT1G16500]	F3O9.30	5639032	5640173	1	1	UniProtKB Gene Name
AT1G16510	0.0453793	2.39359	2.29597	1.57831	2.975	2.61987	2.88532	2.82673	2.45969	2.90082	3.17963	2.84671	1.24842	0.226488	1.2684	0.216766	SAUR-like auxin-responsive protein family [Source:TAIR_LOCUS;Acc:AT1G16510]	SAUR41	5644572	5645443	-1	1	UniProtKB Gene Name
AT1G16515	0.837177	2.53316	-0.626563	0.91459	-0.161976	1.62305	1.23849	0.899854	-0.224752	1.49815	-0.0346366	0.412921	-0.0147357	0.996438	-0.501669	0.825235	unknown protein; Has 35333 Blast hits to 34131 proteins in 2444 species: Archae - 798; Bacteria - 22429; Metazoa - 974; Fungi - 991; Plants - 531; Viruses - 0; Other Eukaryotes - 9610 (source: NCBI BLink). [Source:TAIR_LOCUS;Acc:AT1G16515]		5647549	5647813	-1	1
AT1G16520	0.872584	2.28835	1.65298	1.60464	1.94349	3.2304	2.04796	2.40728	1.53308	2.99274	2.28841	2.27141	0.802645	0.109223	0.666771	0.201803	unknown protein; FUNCTIONS IN: molecular_function unknown; INVOLVED IN: biological_process unknown; LOCATED IN: plasma membrane; EXPRESSED IN: 22 plant structures; EXPRESSED DURING: 13 growth stages; BEST Arabidopsis thaliana protein match is: unkno /.../tein (TAIR:AT1G56080.1); Has 243 Blast hits to 234 proteins in 69 species: Archae - 2; Bacteria - 2; Metazoa - 61; Fungi - 9; Plants - 125; Viru…	F3O9.32	5648760	5651167	1	1	UniProtKB Gene Name
AT1G16540	3.99526	4.27505	3.4449	3.90507	3.21288	3.88151	3.86751	3.65396	3.86353	4.17291	4.13322	4.05655	-0.251107	0.700263	0.151483	0.84945	molybdenum cofactor sulfurase (LOS5) (ABA3) [Source:TAIR_LOCUS;Acc:AT1G16540]	SIR3	5659415	5665449	1	1	TAIR Gene Name
AT1G16560	5.72839	5.19671	5.80617	5.57709	5.51667	5.38009	5.58101	5.49259	5.5081	5.43455	5.69586	5.54617	-0.0844981	0.88203	-0.0309179	0.963088	Per1-like family protein [Source:TAIR_LOCUS;Acc:AT1G16560]	F19K19.12	5668384	5670708	1	4	UniProtKB Gene Name
AT1G16570	4.0658	3.94327	4.06551	4.02486	4.22161	3.72535	3.86751	3.93816	3.88594	3.90604	3.93208	3.90802	-0.0867025	0.856655	-0.116838	0.786469	UDP-Glycosyltransferase superfamily protein [Source:TAIR_LOCUS;Acc:AT1G16570]	F19K19.11	5670577	5673600	-1	2	UniProtKB Gene Name
AT1G16590	2.3612	2.71994	3.02133	2.70082	3.26676	2.90381	2.54642	2.90566	2.6157	2.95457	2.677	2.74909	0.204842	0.825081	0.0482653	0.968217	DNA-binding HORMA family protein [Source:TAIR_LOCUS;Acc:AT1G16590]	REV7	5673795	5675131	1	1	TAIR Gene Name
AT1G16610	4.03487	5.3753	4.76642	4.72553	5.03922	5.41463	5.17789	5.21058	5.27258	5.49497	5.36722	5.37826	0.485049	0.399738	0.652727	0.203012	arginine/serine-rich 45 [Source:TAIR_LOCUS;Acc:AT1G16610]	SR45	5675704	5678852	-1	3	TAIR Gene Name
AT1G16650	3.38444	3.29643	3.4634	3.38142	3.43929	3.19163	3.00051	3.21048	3.35885	3.39085	3.5452	3.43163	-0.170946	0.658692	0.0502127	0.930563	S-adenosyl-L-methionine-dependent methyltransferases superfamily protein [Source:TAIR_LOCUS;Acc:AT1G16650]		5687943	5691198	1	1
AT1G16670	4.92062	4.64756	5.27092	4.94637	4.60029	4.68903	4.62819	4.63917	4.93813	4.94796	4.46679	4.78429	-0.307198	0.518788	-0.162072	0.800829	Protein kinase superfamily protein [Source:TAIR_LOCUS;Acc:AT1G16670]	F19K19.4	5697324	5699769	1	1	UniProtKB Gene Name
AT1G16680	4.96846	5.27447	4.87554	5.03949	4.86168	4.88502	4.49209	4.74627	4.54438	4.82655	4.49434	4.62176	-0.293223	0.632957	-0.41773	0.416228	Chaperone DnaJ-domain superfamily protein [Source:TAIR_LOCUS;Acc:AT1G16680]	F19K19.3	5702753	5705838	1	1	UniProtKB Gene Name
AT1G16690	2.68875	2.88117	3.00884	2.85958	2.99963	2.52642	2.87194	2.79933	2.89243	2.82201	2.6883	2.80091	-0.0602562	0.924492	-0.0586717	0.92723	Enhancer of polycomb-like transcription factor protein [Source:TAIR_LOCUS;Acc:AT1G16690]	F19K19.2	5705969	5709533	1	1	UniProtKB Gene Name
AT1G16700	5.20649	5.11364	6.57644	5.63219	6.35069	5.60601	5.20922	5.72197	5.37222	5.37604	5.49281	5.41369	0.0897816	0.961559	-0.218501	0.892026	Alpha-helical ferredoxin [Source:TAIR_LOCUS;Acc:AT1G16700]		5709725	5711902	1	1
AT1G16710	5.59959	5.74952	3.95477	5.10129	4.2899	5.14423	5.87518	5.1031	5.39344	5.67445	5.78887	5.61892	0.00181217	0.999287	0.51763	0.702507	histone acetyltransferase of the CBP family 12 [Source:TAIR_LOCUS;Acc:AT1G16710]	HAC12	5714219	5722614	1	2	TAIR Gene Name
AT1G16720	7.49235	6.70111	7.57442	7.25596	6.99764	5.6179	7.66124	6.75892	7.27327	6.01701	7.29975	6.86334	-0.497034	0.368755	-0.392617	0.526572	high chlorophyll fluorescence phenotype 173 [Source:TAIR_LOCUS;Acc:AT1G16720]	HCF173	5723088	5726478	1	1	TAIR Gene Name
AT1G16730	1.74948	1.34452	1.65298	1.58233	2.55166	2.47437	2.70079	2.5756	2.07036	1.86479	1.5707	1.83528	0.993277	0.0214613	0.252957	0.705353	unknown protein 6 [Source:TAIR_LOCUS;Acc:AT1G16730]	UP6	5726368	5727312	-1	1	TAIR Gene Name
AT1G16740	3.86286	4.22717	5.40993	4.49999	5.4911	4.65466	3.80788	4.65121	4.30349	4.47776	4.11244	4.2979	0.151226	0.940714	-0.202091	0.916714	Ribosomal protein L20 [Source:TAIR_LOCUS;Acc:AT1G16740]		5727690	5729080	1	1
AT1G16750	3.22577	3.89063	2.857	3.32447	1.94349	3.18805	2.01585	2.38246	2.21446	3.08556	2.09788	2.46597	-0.942003	0.0717161	-0.858501	0.105311	Protein of unknown function, DUF547 [Source:TAIR_LOCUS;Acc:AT1G16750]		5729097	5731870	-1	1
AT1G16780	4.29352	4.10426	2.98354	3.79377	2.82885	3.51631	3.69594	3.34703	3.39067	3.64673	3.49466	3.51069	-0.44674	0.696783	-0.283083	0.837978	Inorganic H pyrophosphatase family protein [Source:TAIR_LOCUS;Acc:AT1G16780]	VHP2;2	5739299	5744214	-1	1	TAIR Gene Name
AT1G16790	0.907143	2.37087	3.36353	2.21385	3.22549	2.58213	2.032	2.6132	2.30914	2.30226	1.81763	2.14301	0.399359	0.823043	-0.0708349	0.976357	ribosomal protein-related [Source:TAIR_LOCUS;Acc:AT1G16790]		5744553	5745209	1	1
AT1G16800	3.2596	3.00048	1.50309	2.58772	1.50068	1.82188	3.20291	2.17516	2.53983	2.86383	3.0455	2.81638	-0.412567	0.844214	0.228661	0.925428	P-loop containing nucleoside triphosphate hydrolases superfamily protein [Source:TAIR_LOCUS;Acc:AT1G16800]		5745523	5755263	-1	1
AT1G16810	5.89588	5.82574	6.94327	6.22163	7.0172	5.9963	5.79842	6.27064	5.85499	5.81925	5.80186	5.82537	0.0490133	0.974396	-0.396261	0.67757	unknown protein; CONTAINS InterPro DOMAIN/s: Protein of unknown function DUF1754, eukaryotic (InterPro:IPR013865); Has 395 Blast hits to 394 proteins in 162 species: Archae - 0; Bacteria - 0; Metazoa - 181; Fungi - 91; Plants - 65; Viruses - 0; Othe /.../ryotes - 58 (source: NCBI BLink). [Source:TAIR_LOCUS;Acc:AT1G16810]	F6I1.17	5755588	5756895	1	2	UniProtKB Gene Name
AT1G16820	1.67121	1.65881	2.29597	1.87533	1.83932	1.34115	1.44565	1.54204	1.67329	1.72254	1.27243	1.55609	-0.333291	0.714533	-0.319242	0.730859	vacuolar ATP synthase catalytic subunit-related / V-ATPase-related / vacuolar proton pump-related [Source:TAIR_LOCUS;Acc:AT1G16820]		5756835	5758464	-1	2
AT1G16825	1.77777	1.74108	2.07619	1.86501	2.61018	1.82188	1.55029	1.99412	1.42375	1.71421	1.45605	1.53134	0.129105	0.899378	-0.333679	0.643581	Reticulon family protein [Source:TAIR_LOCUS;Acc:AT1G16825]	RTNLB23	5758855	5760501	1	1	UniProtKB Gene Name
AT1G16830	0.220475	1.30895	-2.47982	-0.316798	0.585322	1.48902	0.11605	0.730129	0.260217	1.54593	0.751707	0.852617	1.04693	0.353129	1.16942	0.277752	Pentatricopeptide repeat (PPR) superfamily protein [Source:TAIR_LOCUS;Acc:AT1G16830]		5760772	5762619	1	1
AT1G16840	5.5628	6.55503	7.01004	6.37595	6.65968	6.4029	6.5104	6.52432	6.39465	6.38991	6.22423	6.33626	0.14837	0.864799	-0.0396883	0.970592	unknown protein; BEST Arabidopsis thaliana protein match is: unknown protein (TAIR:AT1G78890.1); Has 35333 Blast hits to 34131 proteins in 2444 species: Archae - 798; Bacteria - 22429; Metazoa - 974; Fungi - 991; Plants - 531; Viruses - 0; Other Euk /.../s - 9610 (source: NCBI BLink). [Source:TAIR_LOCUS;Acc:AT1G16840]	F6I1.16	5762694	5764073	-1	4	UniProtKB Gene Name
AT1G16850	4.66695	7.45227	7.59453	6.57125	6.12621	7.20757	6.61359	6.64912	4.90884	5.67234	5.16966	5.25028	0.0778713	0.967331	-1.32097	0.106247	unknown protein; FUNCTIONS IN: molecular_function unknown; INVOLVED IN: response to salt stress; LOCATED IN: endomembrane system; EXPRESSED IN: leaf apex, leaf whorl, male gametophyte, flower, leaf; EXPRESSED DURING: LP.06 six leaves visible, LP.04 /.../eaves visible, LP.10 ten leaves visible, petal differentiation and expansion stage, LP.08 eight leaves visible; BEST Arabidopsis thaliana protein…	AT1G16880/F17F16.7	5764807	5765651	-1	1	UniProtKB Gene Name
AT1G16870	4.04849	4.28112	3.73534	4.02165	3.62261	4.42312	3.86075	3.96883	3.88998	4.19084	4.14349	4.07477	-0.0528198	0.938491	0.0531229	0.938063	mitochondrial 28S ribosomal protein S29-related [Source:TAIR_LOCUS;Acc:AT1G16870]	F6I1.13	5770732	5773251	-1	1	UniProtKB Gene Name
AT1G16880	8.70966	8.29718	8.15142	8.38609	8.03036	8.39544	8.3888	8.27153	8.03798	8.23032	8.19182	8.15337	-0.114553	0.935319	-0.232713	0.844598	uridylyltransferase-related [Source:TAIR_LOCUS;Acc:AT1G16880]	F6I1.12	5773592	5776308	1	2	UniProtKB Gene Name
AT1G16890	6.81276	6.53001	6.97578	6.77285	6.77765	6.83738	6.76718	6.79407	6.73623	6.78389	6.92345	6.81452	0.0212199	0.97637	0.0416731	0.951441	ubiquitin-conjugating enzyme 36 [Source:TAIR_LOCUS;Acc:AT1G16890]	UBC36	5776177	5778484	-1	3	TAIR Gene Name
AT1G16900	4.17974	4.05553	3.43555	3.89027	3.51333	3.79504	4.10705	3.80514	3.98924	4.18489	4.2154	4.12984	-0.0851335	0.923742	0.239566	0.706962	Alg9-like mannosyltransferase family [Source:TAIR_LOCUS;Acc:AT1G16900]	ALG9	5779021	5782433	-1	1	UniProtKB Gene Name
AT1G16916	3.236	1.62067	2.95779	2.60482	2.97002	2.01282	1.71941	2.23409	2.05585	2.02143	2.32511	2.13413	-0.370736	0.748064	-0.470695	0.649776	unknown protein; FUNCTIONS IN: molecular_function unknown; INVOLVED IN: biological_process unknown; LOCATED IN: cellular_component unknown; Has 30201 Blast hits to 17322 proteins in 780 species: Archae - 12; Bacteria - 1396; Metazoa - 17338; Fungi - /.../ Plants - 5037; Viruses - 0; Other Eukaryotes - 2996 (source: NCBI BLink). [Source:TAIR_LOCUS;Acc:AT1G16916]		5786560	5787112	-1	1
AT1G16920	3.68258	2.44346	4.55775	3.56126	3.67279	3.19876	3.30269	3.39141	3.04976	2.25148	3.03226	2.77783	-0.16985	0.874586	-0.783433	0.170074	RAB GTPase homolog A1B [Source:TAIR_LOCUS;Acc:AT1G16920]	RAB11	5787330	5789249	-1	1	TAIR Gene Name
AT1G16930	2.71824	1.95525	1.6047	2.09273	1.07756	1.56872	1.69933	1.44853	1.72941	1.66317	1.84824	1.74694	-0.644197	0.421809	-0.345792	0.74936	F-box/RNI-like/FBD-like domains-containing protein [Source:TAIR_LOCUS;Acc:AT1G16930]		5789987	5791534	1	1
AT1G16960	4.13305	3.89261	4.71257	4.24608	3.80534	3.5333	2.58523	3.30796	3.30216	2.98243	2.46323	2.91594	-0.938123	0.16408	-1.33014	0.0392007	Ubiquitin domain-containing protein [Source:TAIR_LOCUS;Acc:AT1G16960]	F6I1.3	5799888	5800845	1	1	UniProtKB Gene Name
AT1G16970	4.45845	4.06435	3.31855	3.94712	3.56402	3.87042	3.77951	3.73798	3.73018	4.15628	3.77164	3.88603	-0.209137	0.728804	-0.0610853	0.943616	KU70 homolog [Source:TAIR_LOCUS;Acc:AT1G16970]	KU70	5800767	5805799	-1	1	TAIR Gene Name
AT1G17020	-1.85002	-0.208468	-2.02567	-1.36139	1.51423	4.05203	2.90736	2.82454	4.40675	4.10835	4.90241	4.4725	4.18593	0.0121497	5.83389	0.00139392	senescence-related gene 1 [Source:TAIR_LOCUS;Acc:AT1G17020]	SRG1	5820206	5822013	1	1	TAIR Gene Name
AT1G17040	3.3089	3.30541	2.70311	3.10581	2.52487	3.02113	3.16683	2.90428	2.96364	3.338	2.7915	3.03105	-0.201529	0.697735	-0.0747575	0.917823	SH2 domain protein A [Source:TAIR_LOCUS;Acc:AT1G17040]	SHA	5824848	5828233	1	2	TAIR Gene Name
AT1G17050	5.18903	5.01099	4.49093	4.89699	4.43053	4.78978	4.56729	4.59587	3.9798	4.69391	3.76099	4.1449	-0.301118	0.680675	-0.752086	0.130252	solanesyl diphosphate synthase 2 [Source:TAIR_LOCUS;Acc:AT1G17050]	SPS2	5829080	5831343	1	1	TAIR Gene Name
AT1G17060	1.1136	0.401795	3.26162	1.59234	0.274696	0.634216	0.600961	0.503291	1.24223	0.844812	2.21988	1.43564	-1.08905	0.181549	-0.1567	0.926407	cytochrome p450 72c1 [Source:TAIR_LOCUS;Acc:AT1G17060]	CYP72C1	5832097	5835456	-1	1	TAIR Gene Name
AT1G17070	3.13391	3.95281	3.30324	3.46332	3.06646	3.54731	3.86301	3.49226	3.36178	3.88231	3.8186	3.68756	0.0289407	0.968764	0.224242	0.606732	GC-rich sequence DNA-binding factor-like protein with Tuftelin interacting domain [Source:TAIR_LOCUS;Acc:AT1G17070]	F20D23.23	5837590	5840332	1	1	UniProtKB Gene Name
AT1G17080	5.23398	5.42112	6.09882	5.58464	5.89709	5.77365	5.48921	5.71998	5.37222	5.58584	5.86327	5.60711	0.135343	0.880309	0.0224685	0.983513	Ribosomal protein L18ae family [Source:TAIR_LOCUS;Acc:AT1G17080]	F20D23.22	5840269	5841606	-1	1	UniProtKB Gene Name
AT1G17090	0.800879	1.42425	0.737474	0.987535	0.659724	1.14685	0.175487	0.660686	-0.417753	1.23199	0.707772	0.507335	-0.32685	0.799983	-0.480201	0.658937	unknown protein; INVOLVED IN: biological_process unknown; LOCATED IN: endomembrane system; EXPRESSED IN: 17 plant structures; EXPRESSED DURING: 7 growth stages; Has 5 Blast hits to 5 proteins in 2 species: Archae - 0; Bacteria - 0; Metazoa - 0; Fung /.../ Plants - 5; Viruses - 0; Other Eukaryotes - 0 (source: NCBI BLink). [Source:TAIR_LOCUS;Acc:AT1G17090]		5842216	5844283	-1	2
AT1G17100	4.36053	6.58358	5.58084	5.50831	6.00428	6.91163	5.2893	6.0684	4.95638	6.60577	5.08171	5.54795	0.560088	0.692855	0.03964	0.985924	SOUL heme-binding family protein [Source:TAIR_LOCUS;Acc:AT1G17100]	F20D23.21	5844676	5845661	1	1	UniProtKB Gene Name
AT1G17110	5.91617	5.97445	4.29362	5.39475	4.7271	5.43421	5.84245	5.33459	5.82313	5.96028	6.00538	5.92959	-0.0601588	0.975853	0.534849	0.659196	ubiquitin-specific protease 15 [Source:TAIR_LOCUS;Acc:AT1G17110]	UBP15	5845660	5850934	-1	2	TAIR Gene Name
AT1G17120	4.52812	4.30214	3.79152	4.20726	3.27082	4.19558	4.38165	3.94935	4.1938	4.25186	4.45365	4.29977	-0.25791	0.792915	0.0925132	0.942733	cationic amino acid transporter 8 [Source:TAIR_LOCUS;Acc:AT1G17120]	CAT8	5851953	5853955	1	1	TAIR Gene Name
AT1G17130	5.16335	5.36396	5.60447	5.37726	5.85331	5.40779	4.82947	5.36352	4.96209	5.2506	4.67932	4.964	-0.0137391	0.99148	-0.413258	0.553175	Family of unknown function (DUF572) [Source:TAIR_LOCUS;Acc:AT1G17130]	F20D23.18	5854148	5856697	1	2	UniProtKB Gene Name
AT1G17140	4.89394	3.94327	5.72507	4.85409	5.85816	3.85476	4.29246	4.66846	4.39972	3.2549	3.58802	3.74754	-0.185634	0.920135	-1.10655	0.232366	interactor of constitutive active rops 1 [Source:TAIR_LOCUS;Acc:AT1G17140]	ICR1	5856573	5858550	-1	2	TAIR Gene Name
AT1G17145	5.28743	4.70273	4.50905	4.83307	4.52993	4.48678	4.99479	4.6705	4.85966	4.5899	4.89271	4.78076	-0.162571	0.840683	-0.0523112	0.959022	RING/U-box superfamily protein [Source:TAIR_LOCUS;Acc:AT1G17145]	AT1G17140	5860119	5862682	-1	1	UniProtKB Gene Name
AT1G17147	2.99622	1.18357	3.30836	2.49605	3.29497	1.7747	2.40485	2.4915	3.77457	2.15649	2.54638	2.82581	-0.00454239	0.998189	0.329767	0.824458	VQ motif-containing protein [Source:TAIR_LOCUS;Acc:AT1G17147]	F20D23.16	5863431	5864009	-1	1	UniProtKB Gene Name
AT1G17160	3.93791	4.90631	4.93226	4.59216	4.86442	4.63521	4.68535	4.72833	4.74488	4.86879	4.78801	4.80056	0.136166	0.847173	0.208399	0.727103	pfkB-like carbohydrate kinase family protein [Source:TAIR_LOCUS;Acc:AT1G17160]	F20D23.14	5867635	5869356	1	2	UniProtKB Gene Name
AT1G17170	-0.660925	0.591966	0.581555	0.170865	1.16571	2.94682	0.91167	1.67473	2.87611	3.06291	3.05426	2.99776	1.50387	0.160736	2.82689	0.00760102	glutathione S-transferase TAU 24 [Source:TAIR_LOCUS;Acc:AT1G17170]	ATGSTU24	5869846	5870840	1	1	TAIR Gene Name
AT1G17190	2.91788	3.05127	2.75623	2.90846	1.76172	2.28579	1.62674	1.89142	1.35389	1.72254	0.465392	1.18061	-1.01704	0.269165	-1.72785	0.0383899	glutathione S-transferase tau 26 [Source:TAIR_LOCUS;Acc:AT1G17190]	ATGSTU26	5875350	5876545	1	1	TAIR Gene Name
AT1G17200	4.3306	4.33456	4.98849	4.55122	4.73607	4.04417	4.04087	4.2737	4.32445	3.91507	4.12701	4.12218	-0.277515	0.849105	-0.429038	0.726801	Uncharacterised protein family (UPF0497) [Source:TAIR_LOCUS;Acc:AT1G17200]		5878400	5880041	1	2
AT1G17210	5.5594	5.99978	4.97381	5.511	5.20079	5.60002	5.80663	5.53581	5.80746	5.86058	5.80509	5.82438	0.0248143	0.982934	0.313376	0.662864	IAP-like protein 1 [Source:TAIR_LOCUS;Acc:AT1G17210]	ATILP1	5880130	5884756	-1	1	TAIR Gene Name
AT1G17220	8.88783	8.73797	8.7132	8.77967	8.40257	8.29747	8.87891	8.52632	8.28636	8.37476	8.31647	8.32586	-0.253351	0.741344	-0.453806	0.432553	Translation initiation factor 2, small GTP-binding protein [Source:TAIR_LOCUS;Acc:AT1G17220]	FUG1	5885083	5890470	1	1	TAIR Gene Name
AT1G17230	3.32497	2.60304	3.21335	3.04712	1.52765	2.58213	2.95468	2.35482	2.75631	2.83736	3.67	3.08789	-0.692296	0.501079	0.0407732	0.983078	Leucine-rich receptor-like protein kinase family protein [Source:TAIR_LOCUS;Acc:AT1G17230]		5891324	5895075	1	1
AT1G17240	1.24099	1.27247	0.407033	0.973498	0.841405	0.5466	1.66866	1.01889	1.36577	1.68892	1.21087	1.42185	0.045391	0.975746	0.448355	0.602	receptor like protein 2 [Source:TAIR_LOCUS;Acc:AT1G17240]	AtRLP2	5896416	5898717	-1	1	TAIR Gene Name
AT1G17250	0.583063	1.27247	-0.703647	0.383963	1.28083	1.39215	2.09484	1.58927	2.98661	2.77495	3.14725	2.9696	1.20531	0.180775	2.58564	0.00412153	receptor like protein 3 [Source:TAIR_LOCUS;Acc:AT1G17250]	AtRLP3	5901169	5903439	-1	1	TAIR Gene Name
AT1G17255	2.40418	2.7064	2.68758	2.59939	2.38308	2.28579	2.59069	2.41985	2.07036	2.44966	2.16423	2.22808	-0.179537	0.815084	-0.371304	0.497544	other RNA [Source:TAIR_LOCUS;Acc:AT1G17255]		5899994	5903619	1	1
AT1G17270	2.38592	2.65565	2.59905	2.54687	2.0026	2.48024	2.42943	2.30409	2.26574	2.34594	2.37497	2.32888	-0.242781	0.620038	-0.217988	0.672179	O-fucosyltransferase family protein [Source:TAIR_LOCUS;Acc:AT1G17270]		5909249	5911693	-1	1
AT1G17280	5.77124	5.51566	5.95351	5.74681	5.76897	5.48275	5.3723	5.54134	5.27487	5.38832	5.32099	5.32806	-0.205465	0.703305	-0.418744	0.276477	ubiquitin-conjugating enzyme 34 [Source:TAIR_LOCUS;Acc:AT1G17280]	UBC34	5916871	5920089	-1	2	TAIR Gene Name
AT1G17290	7.90168	6.54413	7.1317	7.19251	7.53386	6.7803	8.26135	7.52517	7.78482	7.02518	8.40334	7.73778	0.332661	0.605712	0.545275	0.284561	alanine aminotransferas [Source:TAIR_LOCUS;Acc:AT1G17290]	AlaAT1	5922630	5926400	1	1	TAIR Gene Name
AT1G17330	4.29189	4.23031	4.22146	4.24788	4.42869	4.40484	4.05277	4.29543	4.3289	4.37449	4.14554	4.28298	0.0475495	0.934977	0.0350942	0.95408	Metal-dependent phosphohydrolase [Source:TAIR_LOCUS;Acc:AT1G17330]	F28G4.22	5929909	5931831	1	1	UniProtKB Gene Name
AT1G17340	4.96025	4.72843	5.05664	4.91511	4.11393	4.33413	5.1905	4.54619	5.07532	4.60999	5.04716	4.91082	-0.36892	0.724601	-0.00428508	0.997927	Phosphoinositide phosphatase family protein [Source:TAIR_LOCUS;Acc:AT1G17340]	SAC5	5933870	5938761	1	1	UniProtKB Gene Name
AT1G17350	3.57383	2.73334	3.89095	3.39937	3.76247	2.60919	2.54079	2.97082	3.01295	2.54637	2.60125	2.72019	-0.428555	0.535567	-0.679184	0.228531	NADH:ubiquinone oxidoreductase intermediate-associated protein 30 [Source:TAIR_LOCUS;Acc:AT1G17350]	AT1G17350/F28G4_16	5941784	5944463	1	2	UniProtKB Gene Name
AT1G17360	5.9241	4.57794	4.01277	4.83827	4.6422	4.87401	5.55199	5.02273	5.06916	4.89355	5.21801	5.06024	0.184463	0.893277	0.221973	0.865122	BEST Arabidopsis thaliana protein match is: COP1-interacting protein-related (TAIR:AT1G72410.1); Has 9949 Blast hits to 7480 proteins in 576 species: Archae - 12; Bacteria - 1007; Metazoa - 3636; Fungi - 982; Plants - 444; Viruses - 50; Other Eukary /.../ 3818 (source: NCBI BLink). [Source:TAIR_LOCUS;Acc:AT1G17360]	F28G4.18	5946764	5951473	1	1	UniProtKB Gene Name
AT1G17370	5.23992	6.15293	5.91611	5.76965	5.83303	5.94169	6.02699	5.9339	5.80378	5.91062	5.76186	5.82542	0.16425	0.793196	0.055766	0.946432	oligouridylate binding protein 1B [Source:TAIR_LOCUS;Acc:AT1G17370]	UBP1B	5951542	5955037	-1	2	TAIR Gene Name
AT1G17380	2.07997	-0.0764442	4.3797	2.12774	2.97996	3.81599	2.91173	3.23589	3.69364	2.10653	2.23539	2.67852	1.10815	0.639845	0.550779	0.861068	jasmonate-zim-domain protein 5 [Source:TAIR_LOCUS;Acc:AT1G17380]	JAZ5	5955488	5957212	-1	1	TAIR Gene Name
AT1G17410	2.81697	2.05857	3.08817	2.65457	2.84522	2.29249	2.41103	2.51625	2.26574	2.06788	2.40271	2.24544	-0.138322	0.845234	-0.409129	0.347547	Nucleoside diphosphate kinase family protein [Source:TAIR_LOCUS;Acc:AT1G17410]		5968534	5969995	-1	2
AT1G17420	4.64792	5.03623	7.71404	5.7994	5.02584	5.92426	5.69476	5.54829	5.99245	5.74241	5.21413	5.64966	-0.251112	0.911664	-0.149737	0.95196	lipoxygenase 3 [Source:TAIR_LOCUS;Acc:AT1G17420]	LOX3	5977411	5981480	1	1	TAIR Gene Name
AT1G17430	4.05235	3.26299	5.33505	4.2168	3.26676	3.44327	3.26565	3.32523	3.48476	3.65107	3.48498	3.54027	-0.89157	0.318624	-0.676526	0.505367	alpha/beta-Hydrolases superfamily protein [Source:TAIR_LOCUS;Acc:AT1G17430]	F28G4.9	5982267	5984013	1	1	UniProtKB Gene Name
AT1G17440	5.77359	6.26725	5.33888	5.79324	4.55713	5.62512	5.97953	5.38726	5.77451	6.07955	5.87991	5.91132	-0.405982	0.692329	0.118081	0.937421	Transcription initiation factor TFIID subunit A [Source:TAIR_LOCUS;Acc:AT1G17440]	EER4	5983984	5987784	-1	2	TAIR Gene Name
AT1G17450	4.93744	5.5163	4.13397	4.86257	4.24681	4.95356	5.33303	4.84447	4.94872	5.72215	5.21607	5.29565	-0.0181044	0.991487	0.433077	0.675174	B-block binding subunit of TFIIIC [Source:TAIR_LOCUS;Acc:AT1G17450]	F28G4.7	5988280	5996785	-1	2	UniProtKB Gene Name
AT1G17455	4.12939	3.22875	5.21918	4.19244	4.52649	3.37262	3.63916	3.84609	3.455	3.24918	3.51699	3.40706	-0.34635	0.762508	-0.785384	0.313396	ELF4-like 4 [Source:TAIR_LOCUS;Acc:AT1G17455]	ELF4-L4	5997180	5998475	1	2	TAIR Gene Name
AT1G17460	4.26215	4.85146	3.93158	4.3484	4.46502	4.55465	4.12783	4.3825	4.05177	4.53493	3.96723	4.18464	0.0341001	0.967733	-0.163756	0.790273	TRF-like 3 [Source:TAIR_LOCUS;Acc:AT1G17460]	TRFL3	5998814	6002716	1	2	TAIR Gene Name
AT1G17470	6.17741	5.94961	6.34775	6.15825	6.32375	5.91573	6.31747	6.18565	6.18428	6.10632	6.4599	6.25017	0.027395	0.960886	0.0919145	0.834252	developmentally regulated G-protein 1 [Source:TAIR_LOCUS;Acc:AT1G17470]	ATDRG1	6002912	6006405	1	2	TAIR Gene Name
AT1G17480	0.907143	0.777352	0.982084	0.888859	0.305823	1.16163	0.783888	0.750448	0.876453	1.01787	1.22651	1.04028	-0.138412	0.944965	0.151416	0.938901	IQ-domain 7 [Source:TAIR_LOCUS;Acc:AT1G17480]	IQD7	6006461	6008266	-1	1	TAIR Gene Name
AT1G17490	4.35114	4.07662	5.50417	4.64397	5.4982	4.6326	4.03288	4.72122	3.94726	4.37188	3.88629	4.06848	0.0772495	0.969846	-0.575499	0.644095	unknown protein; BEST Arabidopsis thaliana protein match is: unknown protein (TAIR:AT1G72690.1); Has 57 Blast hits to 45 proteins in 9 species: Archae - 0; Bacteria - 0; Metazoa - 0; Fungi - 0; Plants - 57; Viruses - 0; Other Eukaryotes - 0 (source: /.../BLink). [Source:TAIR_LOCUS;Acc:AT1G17490]		6008589	6009420	1	1
AT1G17500	5.79682	4.61916	4.67286	5.02961	4.29998	4.44117	5.68333	4.80816	5.18103	5.03209	5.80186	5.33833	-0.22145	0.887533	0.308716	0.827336	ATPase E1-E2 type family protein / haloacid dehalogenase-like hydrolase family protein [Source:TAIR_LOCUS;Acc:AT1G17500]	ALA4	6018757	6023503	1	1	UniProtKB Gene Name
AT1G17510	2.2033	2.39359	2.21198	2.26962	2.46276	2.59843	1.94086	2.33401	2.08473	2.66736	2.49578	2.41596	0.0643926	0.938192	0.146335	0.828255	unknown protein; Has 11 Blast hits to 11 proteins in 4 species: Archae - 0; Bacteria - 0; Metazoa - 0; Fungi - 0; Plants - 11; Viruses - 0; Other Eukaryotes - 0 (source: NCBI BLink). [Source:TAIR_LOCUS;Acc:AT1G17510]	AT1G17510/F11A6_2	6023504	6024309	-1	1	UniProtKB Gene Name
AT1G17520	3.68258	3.91426	4.08669	3.89451	4.1388	3.79972	3.59642	3.84498	3.87376	3.86378	3.61192	3.78315	-0.0495293	0.941576	-0.111355	0.841455	Homeodomain-like/winged-helix DNA-binding family protein [Source:TAIR_LOCUS;Acc:AT1G17520]		6024636	6027385	-1	1
AT1G17530	3.2394	4.59384	4.85258	4.2286	5.00985	4.76256	4.65055	4.80766	5.05231	4.92591	4.95113	4.97645	0.579052	0.410564	0.747847	0.23794	translocase of inner mitochondrial membrane 23 [Source:TAIR_LOCUS;Acc:AT1G17530]	ATTIM23-1	6027631	6028506	1	1	TAIR Gene Name
AT1G17550	6.21669	6.77	5.76188	6.24952	5.81032	6.80725	6.79013	6.46923	6.23461	6.61483	6.36033	6.40326	0.21971	0.791001	0.153732	0.869883	homology to ABI2 [Source:TAIR_LOCUS;Acc:AT1G17550]	HAB2	6034362	6037289	1	1	TAIR Gene Name
AT1G17560	0.957477	0.0444478	1.07893	0.693618	1.07756	0.634216	-1.16704	0.181577	-0.298848	-0.714452	-0.369768	-0.461023	-0.512041	0.749824	-1.15464	0.291274	Ribosomal protein L14p/L23e family protein [Source:TAIR_LOCUS;Acc:AT1G17560]	HLL	6037464	6038692	-1	1	TAIR Gene Name
AT1G17580	5.60618	5.37812	4.50454	5.16295	4.40459	4.7709	5.66731	4.9476	5.20368	5.20597	5.50558	5.30508	-0.215343	0.871366	0.142132	0.922734	myosin 1 [Source:TAIR_LOCUS;Acc:AT1G17580]	MYA1	6039303	6049556	1	1	TAIR Gene Name
AT1G17590	2.46924	2.35358	2.40412	2.40898	2.1319	2.31899	2.32847	2.25979	2.37478	2.81039	2.58924	2.59147	-0.149189	0.865049	0.182493	0.824498	nuclear factor Y, subunit A8 [Source:TAIR_LOCUS;Acc:AT1G17590]	NF-YA8	6050193	6052568	-1	4	TAIR Gene Name
AT1G17600	3.33134	2.38795	2.67975	2.79968	2.44859	2.02899	3.12983	2.5358	2.80458	2.83354	3.06296	2.90036	-0.263877	0.839005	0.100681	0.950237	Disease resistance protein (TIR-NBS-LRR class) family [Source:TAIR_LOCUS;Acc:AT1G17600]		6052936	6056664	-1	1
AT1G17610	3.2326	2.66501	3.36844	3.08868	3.38025	3.1108	2.90298	3.13134	2.90856	2.96159	2.64833	2.83949	0.0426608	0.9633	-0.249189	0.673375	Disease resistance protein (TIR-NBS class) [Source:TAIR_LOCUS;Acc:AT1G17610]		6056895	6058357	1	1
AT1G17620	2.60175	5.00552	6.45706	4.68811	5.13534	5.09959	4.60683	4.94726	4.76793	4.48866	4.77618	4.67759	0.259145	0.920368	-0.0105213	0.997204	Late embryogenesis abundant (LEA) hydroxyproline-rich glycoprotein family [Source:TAIR_LOCUS;Acc:AT1G17620]	AT1G17620/F11A6_23	6062216	6063291	1	1	UniProtKB Gene Name
AT1G17630	1.64073	1.97047	0.291374	1.30086	0.210381	1.65469	1.78759	1.21755	1.04904	1.77155	1.1629	1.32783	-0.0833032	0.968508	0.0269729	0.990209	Pentatricopeptide repeat (PPR-like) superfamily protein [Source:TAIR_LOCUS;Acc:AT1G17630]	PCMP-E72	6064525	6066720	1	1	UniProtKB Gene Name
AT1G17640	2.06474	2.72442	2.45075	2.41331	2.41256	2.48024	2.60154	2.49811	3.02039	2.62815	2.67131	2.77328	0.0848083	0.925811	0.359979	0.501546	RNA-binding (RRM/RBD/RNP motifs) family protein [Source:TAIR_LOCUS;Acc:AT1G17640]		6067394	6069098	-1	1
AT1G17650	5.08532	4.49307	5.29217	4.95685	4.40459	4.30484	4.56729	4.42557	3.99487	3.80865	3.93682	3.91344	-0.531278	0.588631	-1.04341	0.15843	glyoxylate reductase 2 [Source:TAIR_LOCUS;Acc:AT1G17650]	GLYR2	6069477	6072012	-1	1	TAIR Gene Name
AT1G17665	2.93891	5.297	4.49775	4.24455	4.38956	5.24925	4.22043	4.61974	4.21963	5.20378	4.59953	4.67431	0.375189	0.705438	0.429759	0.64516	unknown protein; FUNCTIONS IN: molecular_function unknown; INVOLVED IN: biological_process unknown; LOCATED IN: endomembrane system; EXPRESSED IN: 15 plant structures; EXPRESSED DURING: 11 growth stages; Has 149 Blast hits to 146 proteins in 39 spec /.../rchae - 0; Bacteria - 4; Metazoa - 21; Fungi - 5; Plants - 30; Viruses - 0; Other Eukaryotes - 89 (source: NCBI BLink). [Source:TAIR_LOCUS;Acc:A…	F11A6.1	6072253	6074484	-1	1	UniProtKB Gene Name
AT1G17680	4.75853	4.93344	4.38216	4.69138	4.50745	4.54634	5.0413	4.69836	4.7548	5.0263	5.07315	4.95142	0.00698574	0.994275	0.260041	0.641698	tetratricopeptide repeat (TPR)-containing protein [Source:TAIR_LOCUS;Acc:AT1G17680]	AT1G17680	6076077	6082337	1	2	UniProtKB Gene Name
AT1G17690	4.50856	4.35769	3.5569	4.14105	3.43929	3.96097	4.05277	3.81768	4.03548	4.43584	4.34924	4.27352	-0.323372	0.566111	0.132473	0.871087	FUNCTIONS IN: molecular_function unknown; INVOLVED IN: biological_process unknown; LOCATED IN: nucleus; EXPRESSED IN: 24 plant structures; EXPRESSED DURING: 13 growth stages; CONTAINS InterPro DOMAIN/s: Digestive organ expansion factor, predicted (I /.../o:IPR010678); Has 25006 Blast hits to 13379 proteins in 904 species: Archae - 102; Bacteria - 5571; Metazoa - 7448; Fungi - 3168; Plants - 1056;…	NOF1	6082755	6088340	-1	1	TAIR Gene Name
AT1G17720	5.69664	5.87638	5.02217	5.53173	5.10901	5.77069	5.71983	5.53318	5.57024	5.93676	5.77378	5.76026	0.00145082	0.998927	0.228532	0.761885	Protein phosphatase 2A, regulatory subunit PR55 [Source:TAIR_LOCUS;Acc:AT1G17720]	ATB BETA	6093208	6098383	-1	2	TAIR Gene Name
AT1G17730	4.78549	4.66155	5.4448	4.96394	5.24355	4.84498	4.66483	4.91779	4.48985	4.5454	4.72104	4.58543	-0.0461586	0.963377	-0.378512	0.485195	vacuolar protein sorting 46.1 [Source:TAIR_LOCUS;Acc:AT1G17730]	VPS46.1	6099089	6100315	1	1	TAIR Gene Name
AT1G17744	-4.90907	-0.243463	-2.02567	-2.39273	-0.923478	0.18937	-1.40779	-0.713966	-0.298848	0.844812	0.326944	0.290969	1.67877	0.321893	2.6837	0.0733461	unknown protein; FUNCTIONS IN: molecular_function unknown; INVOLVED IN: biological_process unknown; LOCATED IN: cellular_component unknown; EXPRESSED IN: stem; Has 30201 Blast hits to 17322 proteins in 780 species: Archae - 12; Bacteria - 1396; Meta /.../17338; Fungi - 3422; Plants - 5037; Viruses - 0; Other Eukaryotes - 2996 (source: NCBI BLink). [Source:TAIR_LOCUS;Acc:AT1G17744]	AT1G17740	6100961	6101983	-1	1	UniProtKB Gene Name
AT1G17745	4.48014	6.99073	5.08274	5.51787	6.77617	7.89742	6.47772	7.05044	7.55093	8.60359	7.99746	8.05066	1.53257	0.0349534	2.53279	0.00157363	D-3-phosphoglycerate dehydrogenase [Source:TAIR_LOCUS;Acc:AT1G17745]	PGDH	6100964	6105265	1	2	TAIR Gene Name
AT1G17750	0.539668	-0.515715	2.04019	0.688047	1.003	0.989938	0.68514	0.892691	0.893035	0.919473	1.30225	1.03825	0.204644	0.934561	0.350205	0.874187	PEP1 receptor 2 [Source:TAIR_LOCUS;Acc:AT1G17750]	PEPR2	6106656	6110120	1	1	TAIR Gene Name
AT1G17760	4.68574	4.98992	3.91479	4.53015	4.07229	4.67893	4.64663	4.46595	4.64281	4.89537	4.4782	4.67213	-0.0641978	0.951969	0.141978	0.875117	Tetratricopeptide repeat (TPR)-like superfamily protein [Source:TAIR_LOCUS;Acc:AT1G17760]	CSTF77	6110107	6116617	-1	1	TAIR Gene Name
AT1G17780	4.59325	5.11449	4.73203	4.81326	4.94153	4.99581	4.63216	4.8565	4.68613	5.13248	4.69196	4.83686	0.043246	0.941263	0.0236032	0.969602	unknown protein; BEST Arabidopsis thaliana protein match is: unknown protein (TAIR:AT2G16575.1); Has 35333 Blast hits to 34131 proteins in 2444 species: Archae - 798; Bacteria - 22429; Metazoa - 974; Fungi - 991; Plants - 531; Viruses - 0; Other Euk /.../s - 9610 (source: NCBI BLink). [Source:TAIR_LOCUS;Acc:AT1G17780]		6123701	6125269	1	2
AT1G17790	3.746	3.55174	3.5612	3.61965	3.47502	3.20585	3.53266	3.40451	3.34415	3.39344	3.37399	3.37053	-0.215139	0.565773	-0.249119	0.473558	DNA-binding bromodomain-containing protein [Source:TAIR_LOCUS;Acc:AT1G17790]	GTE5	6125356	6127404	-1	1	UniProtKB Gene Name
AT1G17820	4.26215	4.22403	4.21597	4.23405	4.10936	3.79738	4.61755	4.17476	4.28985	4.31449	4.68355	4.4293	-0.0592858	0.939737	0.195246	0.722352	Putative integral membrane protein conserved region (DUF2404) [Source:TAIR_LOCUS;Acc:AT1G17820]	F2H15.5	6131537	6135345	-1	1	UniProtKB Gene Name
AT1G17830	0.135582	-0.798875	-0.626563	-0.429952	-0.0399955	-0.134304	1.09205	0.305917	0.234288	-0.219286	0.794339	0.269781	0.735869	0.322756	0.699733	0.357247	Protein of unknown function (DUF789) [Source:TAIR_LOCUS;Acc:AT1G17830]	F2H15.6	6135803	6138432	-1	1	UniProtKB Gene Name
AT1G17840	6.19193	6.9259	5.82278	6.31354	5.4741	6.34264	6.82056	6.21243	5.6094	6.03147	5.82687	5.82258	-0.101106	0.954007	-0.49096	0.659939	white-brown complex homolog protein 11 [Source:TAIR_LOCUS;Acc:AT1G17840]	WBC11	6142564	6146521	1	1	TAIR Gene Name
AT1G17850	4.88855	4.27353	3.97436	4.37881	3.79119	4.11532	4.43111	4.11254	4.42625	4.00232	3.8186	4.08239	-0.266274	0.844701	-0.29642	0.821643	Rhodanese/Cell cycle control phosphatase superfamily protein [Source:TAIR_LOCUS;Acc:AT1G17850]	STR8	6145926	6148940	-1	2	UniProtKB Gene Name
AT1G17860	3.31535	1.65881	3.2981	2.75742	3.83323	4.43518	3.78665	4.01835	4.62727	3.71661	4.10615	4.15001	1.26093	0.124684	1.39259	0.0846632	Kunitz family trypsin and protease inhibitor protein [Source:TAIR_LOCUS;Acc:AT1G17860]	F2H15.9	6149301	6150038	1	1	UniProtKB Gene Name
AT1G17870	2.05707	2.43252	2.12287	2.20415	1.21616	1.2051	2.83562	1.75229	1.58475	1.37654	2.14793	1.70307	-0.45186	0.51921	-0.501081	0.451354	ethylene-dependent gravitropism-deficient and yellow-green-like 3 [Source:TAIR_LOCUS;Acc:AT1G17870]	ATEGY3	6149939	6152222	-1	1	TAIR Gene Name
AT1G17880	6.88905	6.64661	7.6801	7.07192	8.13533	7.1452	6.7402	7.34024	6.8871	6.76011	6.66979	6.77234	0.268319	0.831529	-0.299585	0.80494	basic transcription factor 3 [Source:TAIR_LOCUS;Acc:AT1G17880]	BTF3	6152409	6153982	-1	1	TAIR Gene Name
AT1G17890	5.37183	4.71284	5.29612	5.12693	5.09275	4.95042	5.064	5.03572	4.85557	4.78598	5.14638	4.92931	-0.0912062	0.889552	-0.19762	0.690431	NAD(P)-binding Rossmann-fold superfamily protein [Source:TAIR_LOCUS;Acc:AT1G17890]	GER2	6154268	6155752	-1	3	TAIR Gene Name
AT1G17920	2.2712	3.13773	0.737474	2.0488	0.0360176	1.76507	1.46957	1.09022	1.06374	1.52701	1.21087	1.26721	-0.958583	0.76715	-0.781596	0.8244	homeodomain GLABROUS 12 [Source:TAIR_LOCUS;Acc:AT1G17920]	HDG12	6161872	6165382	-1	1	TAIR Gene Name
AT1G17930	3.41478	3.42838	3.08817	3.31045	3.42109	3.24424	3.38664	3.35066	3.35885	3.62707	3.49787	3.4946	0.0402104	0.950818	0.184153	0.658573	Aminotransferase-like, plant mobile domain family protein [Source:TAIR_LOCUS;Acc:AT1G17930]	F2H15.15	6166220	6168839	-1	1	UniProtKB Gene Name
AT1G17940	4.59192	5.60616	5.03165	5.07658	4.24681	5.11369	4.92424	4.76158	4.17247	4.8436	4.20169	4.40592	-0.314993	0.474558	-0.670656	0.0553678	Endosomal targeting BRO1-like domain-containing protein [Source:TAIR_LOCUS;Acc:AT1G17940]	F2H15.16	6169341	6173222	-1	1	UniProtKB Gene Name
AT1G17970	5.63932	4.51251	5.10688	5.08624	5.38121	4.01227	5.42434	4.93927	5.5016	3.71867	4.67791	4.63273	-0.146963	0.92686	-0.453509	0.682625	RING/U-box superfamily protein [Source:TAIR_LOCUS;Acc:AT1G17970]	F2H15.19	6184904	6187472	1	1	UniProtKB Gene Name
AT1G17980	5.1864	5.39353	4.23238	4.93743	4.24055	4.83592	5.08442	4.7203	5.04695	5.31435	5.12894	5.16341	-0.217133	0.841353	0.225979	0.832689	poly(A) polymerase 1 [Source:TAIR_LOCUS;Acc:AT1G17980]	PAPS1	6187507	6191708	-1	2	TAIR Gene Name
AT1G18030	3.73643	3.71555	4.65667	4.03621	4.56888	3.56118	3.41766	3.84924	4.019	3.59369	3.77164	3.79478	-0.186974	0.88952	-0.241439	0.846885	Protein phosphatase 2C family protein [Source:TAIR_LOCUS;Acc:AT1G18030]		6204343	6206988	1	2
AT1G18040	2.82603	2.59326	2.17919	2.53283	1.71546	2.54896	2.29542	2.18661	2.22097	2.53227	1.86829	2.20718	-0.346213	0.716485	-0.325651	0.739342	cyclin-dependent kinase D1;3 [Source:TAIR_LOCUS;Acc:AT1G18040]	CDKD1;3	6206871	6209500	-1	1	TAIR Gene Name
AT1G18060	7.01919	5.8355	7.71303	6.8559	6.69604	5.6904	6.22991	6.20545	6.01896	5.14474	5.30738	5.49036	-0.650457	0.367485	-1.36554	0.0268807	unknown protein; INVOLVED IN: biological_process unknown; LOCATED IN: chloroplast; EXPRESSED IN: 22 plant structures; EXPRESSED DURING: 13 growth stages; Has 74 Blast hits to 74 proteins in 29 species: Archae - 0; Bacteria - 19; Metazoa - 0; Fungi - /.../ants - 49; Viruses - 0; Other Eukaryotes - 6 (source: NCBI BLink). [Source:TAIR_LOCUS;Acc:AT1G18060]	T10F20.7	6211873	6213444	-1	1	UniProtKB Gene Name
AT1G18070	6.92165	6.78856	6.92046	6.87689	6.8574	6.9545	6.59712	6.80301	6.42291	6.87843	6.67544	6.65893	-0.0738847	0.928477	-0.217964	0.710078	Translation elongation factor EF1A/initiation factor IF2gamma family protein [Source:TAIR_LOCUS;Acc:AT1G18070]	T10F20.8	6213725	6218340	-1	3	UniProtKB Gene Name
AT1G18075	0.539668	2.85689	-1.8424	0.51805	-1.07365	2.01282	0.511557	0.483576	0.234288	2.8935	1.17907	1.43562	-0.0344741	0.988982	0.917568	0.479242	MIR159/MIR159B; miRNA [Source:TAIR_LOCUS;Acc:AT1G18075]	MIR159B	6220648	6220833	1	1	TAIR Gene Name
AT1G18080	6.45728	6.90734	7.85347	7.0727	8.38385	7.53393	7.28665	7.73481	7.25416	7.26678	7.59868	7.37321	0.662113	0.529829	0.300509	0.840638	Transducin/WD40 repeat-like superfamily protein [Source:TAIR_LOCUS;Acc:AT1G18080]	ATARCA	6222201	6224151	1	1	TAIR Gene Name
AT1G18090	3.21546	2.88518	2.36571	2.82212	2.2988	2.32554	2.51231	2.37888	2.05585	2.24572	2.33954	2.2137	-0.443233	0.376263	-0.608416	0.172933	5'-3' exonuclease family protein [Source:TAIR_LOCUS;Acc:AT1G18090]	T10F20.10	6224501	6227822	1	2	UniProtKB Gene Name
AT1G18150	6.17297	6.13767	4.71061	5.67375	4.73756	5.8996	6.23165	5.62294	5.78362	5.8092	5.8389	5.81057	-0.0508162	0.980511	0.13682	0.943821	Protein kinase superfamily protein [Source:TAIR_LOCUS;Acc:AT1G18150]	ATMPK8	6244298	6247812	-1	3	TAIR Gene Name
AT1G18160	5.98352	6.03585	5.53353	5.85097	5.49731	5.47767	6.01185	5.66228	5.84888	5.91286	6.21213	5.99129	-0.188688	0.798601	0.14032	0.863921	Protein kinase superfamily protein [Source:TAIR_LOCUS;Acc:AT1G18160]		6248793	6254039	1	1
AT1G18170	5.24077	5.91902	5.95351	5.70443	5.44685	5.69227	5.358	5.49904	5.18673	5.49616	4.88417	5.18902	-0.205394	0.80928	-0.515415	0.351107	FKBP-like peptidyl-prolyl cis-trans isomerase family protein [Source:TAIR_LOCUS;Acc:AT1G18170]	FKBP17-2	6254229	6255690	1	1	UniProtKB Gene Name
AT1G18180	-0.0508409	-0.316124	0.0756535	-0.0971038	0.108275	-0.0634613	-0.430856	-0.128681	-0.0871963	-0.285191	-0.192467	-0.188285	-0.031577	0.986065	-0.0911807	0.958169	Protein of unknown function (DUF1295) [Source:TAIR_LOCUS;Acc:AT1G18180]		6255830	6257900	1	1
AT1G18190	4.36053	4.1297	3.78045	4.09023	3.54732	3.74492	3.97567	3.75597	4.01162	3.86378	3.72309	3.86616	-0.334257	0.463072	-0.224063	0.687743	golgin candidate 2 [Source:TAIR_LOCUS;Acc:AT1G18190]	GC2	6257851	6261457	-1	1	TAIR Gene Name
AT1G18200	0.425103	0.468026	1.12505	0.672727	2.26691	1.78426	1.73922	1.93013	2.36307	1.4884	2.07219	1.97455	1.25741	0.040094	1.30183	0.0336394	RAB GTPase homolog A6B [Source:TAIR_LOCUS;Acc:AT1G18200]	AtRABA6b	6265416	6266937	-1	1	TAIR Gene Name
AT1G18210	3.89766	5.41565	4.95899	4.75743	5.27069	5.81954	4.61622	5.23548	5.22991	5.76634	5.6434	5.54655	0.478053	0.536475	0.789116	0.204718	Calcium-binding EF-hand family protein [Source:TAIR_LOCUS;Acc:AT1G18210]	CML27	6266609	6268828	-1	2	UniProtKB Gene Name
AT1G18260	5.27177	5.43202	5.48233	5.39537	5.49376	5.292	5.64458	5.47678	5.61362	5.5443	5.72276	5.62689	0.0814116	0.897398	0.231522	0.582976	HCP-like superfamily protein [Source:TAIR_LOCUS;Acc:AT1G18260]	AT1G18260	6278848	6282103	-1	1	UniProtKB Gene Name
AT1G18265	3.1841	2.59816	3.86322	3.21516	3.34981	2.40806	2.80777	2.85522	1.65409	1.67181	1.33146	1.55245	-0.359943	0.842697	-1.66271	0.0898524	Protein of unknown function, DUF593 [Source:TAIR_LOCUS;Acc:AT1G18265]		6282252	6283293	-1	1
AT1G18270	5.4784	5.74626	4.78518	5.33661	4.96083	5.3566	6.06905	5.46216	5.68864	5.85594	6.35682	5.96713	0.125549	0.927733	0.630523	0.404347	ketose-bisphosphate aldolase class-II family protein [Source:TAIR_LOCUS;Acc:AT1G18270]		6283412	6293871	-1	3
AT1G18300	3.88904	0.861773	2.59073	2.44718	6.07101	3.08025	2.04	3.73042	4.61399	2.37785	2.04603	3.01262	1.28324	0.325216	0.565443	0.768356	nudix hydrolase homolog 4 [Source:TAIR_LOCUS;Acc:AT1G18300]	atnudt4	6299687	6301086	1	1	TAIR Gene Name
AT1G18320	-0.385277	1.30895	-0.483595	0.146693	0.177132	1.2193	-0.475896	0.306845	0.180972	0.66543	-0.278388	0.189338	0.160152	0.9128	0.0426455	0.979865	Mitochondrial import inner membrane translocase subunit Tim17/Tim22/Tim23 family protein [Source:TAIR_LOCUS;Acc:AT1G18320]	TIM22-4	6304360	6305689	1	1	UniProtKB Gene Name
AT1G18330	4.14938	2.37087	2.74875	3.08967	3.07112	1.84947	3.41766	2.77942	3.10324	2.06788	3.2191	2.79674	-0.31025	0.733363	-0.292929	0.753967	Homeodomain-like superfamily protein [Source:TAIR_LOCUS;Acc:AT1G18330]	EPR1	6305966	6308013	-1	2	TAIR Gene Name
AT1G18335	3.42376	3.00417	3.44954	3.29249	3.40637	2.93832	2.61767	2.98746	3.01295	2.95457	2.52761	2.83171	-0.305034	0.670614	-0.46078	0.430076	Acyl-CoA N-acyltransferases (NAT) superfamily protein [Source:TAIR_LOCUS;Acc:AT1G18335]		6309041	6311326	-1	1
AT1G18340	3.77904	2.74222	2.97714	3.16613	2.50446	2.86845	2.84935	2.74075	2.87611	2.69713	2.71065	2.7613	-0.425378	0.386171	-0.404835	0.419832	basal transcription factor complex subunit-related [Source:TAIR_LOCUS;Acc:AT1G18340]		6311483	6313931	-1	1
AT1G18360	6.75463	5.70593	5.38539	5.94865	4.57055	5.03091	5.71423	5.10523	5.26876	4.43709	4.4553	4.72038	-0.843421	0.296327	-1.22827	0.0929181	alpha/beta-Hydrolases superfamily protein [Source:TAIR_LOCUS;Acc:AT1G18360]		6316695	6319427	-1	1
AT1G18370	0.957477	-0.907209	1.41268	0.487649	-0.547917	-0.941489	-1.02633	-0.838577	-0.965291	-1.73079	0.707772	-0.66277	-1.32623	0.308827	-1.15042	0.406933	ATP binding microtubule motor family protein [Source:TAIR_LOCUS;Acc:AT1G18370]	HIK	6319650	6324222	-1	1	TAIR Gene Name
AT1G18390	3.91474	4.76883	4.07765	4.25374	4.21098	4.2699	4.56314	4.34801	4.76029	4.68131	4.62759	4.68973	0.0942648	0.922076	0.435991	0.417519	Protein kinase superfamily protein [Source:TAIR_LOCUS;Acc:AT1G18390]		6325642	6330098	1	2
AT1G18400	2.27782	1.15712	1.78893	1.74129	0.983746	-0.0293105	1.26607	0.740168	0.518071	-0.584073	2.40271	0.778903	-1.00112	0.566717	-0.962389	0.588929	BR enhanced expression 1 [Source:TAIR_LOCUS;Acc:AT1G18400]	BEE1/AtbHLH44	6331398	6333743	1	1	TAIR Gene Name
AT1G18415	2.57513	2.78147	2.23343	2.53001	1.97334	2.41422	2.52947	2.30568	2.35718	2.44464	2.40956	2.4038	-0.22433	0.834042	-0.126212	0.919406	other RNA [Source:TAIR_LOCUS;Acc:AT1G18415]		6343096	6345662	-1	1
AT1G18440	4.15478	3.62527	3.72768	3.83591	3.10332	3.37262	3.69847	3.39147	3.35005	3.15755	3.40512	3.30424	-0.444442	0.37987	-0.531671	0.258246	Peptidyl-tRNA hydrolase family protein [Source:TAIR_LOCUS;Acc:AT1G18440]		6345974	6347910	1	1
AT1G18450	5.19079	5.21812	5.1641	5.191	5.25927	5.09865	5.10551	5.15448	5.03436	5.09111	5.08703	5.07083	-0.0365269	0.945255	-0.120172	0.752761	actin-related protein 4 [Source:TAIR_LOCUS;Acc:AT1G18450]	ATARP4	6348107	6351975	1	1	TAIR Gene Name
AT1G18460	5.58164	4.41669	5.18837	5.06223	4.43237	3.82061	5.17698	4.47665	4.86984	4.11149	5.09128	4.69087	-0.585582	0.316542	-0.371364	0.610249	alpha/beta-Hydrolases superfamily protein [Source:TAIR_LOCUS;Acc:AT1G18460]		6352470	6356113	1	1
AT1G18470	5.96774	6.02243	5.88125	5.95714	5.73247	5.93907	6.12875	5.93343	5.95978	5.92486	6.24054	6.04172	-0.0237141	0.970523	0.084583	0.872313	Transmembrane Fragile-X-F-associated protein [Source:TAIR_LOCUS;Acc:AT1G18470]		6356131	6360192	-1	2
AT1G18480	3.56844	3.78987	4.17413	3.84415	4.62461	4.03428	3.86526	4.17472	4.10649	4.13792	4.04386	4.09609	0.330569	0.655732	0.251942	0.763261	Calcineurin-like metallo-phosphoesterase superfamily protein [Source:TAIR_LOCUS;Acc:AT1G18480]		6361629	6363007	1	1
AT1G18485	4.46137	3.64189	4.2077	4.10365	3.86331	3.71547	4.36742	3.98207	3.59302	3.35672	3.87152	3.60709	-0.121585	0.941724	-0.496564	0.64128	Pentatricopeptide repeat (PPR) superfamily protein [Source:TAIR_LOCUS;Acc:AT1G18485]	PCMP-H8	6363172	6366235	1	1	UniProtKB Gene Name
AT1G18490	4.15118	4.21297	4.1713	4.17848	4.27364	4.02232	3.83571	4.04389	3.60045	3.8469	3.48821	3.64519	-0.134595	0.870837	-0.533296	0.244778	Protein of unknown function (DUF1637) [Source:TAIR_LOCUS;Acc:AT1G18490]		6366520	6368849	1	1
AT1G18500	6.67851	6.83344	6.75877	6.75691	6.35907	6.40061	6.66157	6.47375	6.84838	6.73719	6.88862	6.82473	-0.283156	0.374417	0.0678253	0.904865	methylthioalkylmalate synthase-like 4 [Source:TAIR_LOCUS;Acc:AT1G18500]	MAML-4	6369347	6373025	1	1	TAIR Gene Name
AT1G18540	6.95842	6.55472	8.13089	7.21468	8.53899	7.30153	7.01396	7.61816	6.96431	6.88048	7.13645	6.99375	0.403482	0.803828	-0.22093	0.909251	Ribosomal protein L6 family protein [Source:TAIR_LOCUS;Acc:AT1G18540]	RPL6A	6377321	6378580	-1	1	UniProtKB Gene Name
AT1G18550	1.45466	2.14156	0.76676	1.45433	0.862607	1.65469	0.783888	1.1004	0.310701	1.13519	0.141039	0.528978	-0.353931	0.720523	-0.925349	0.155479	ATP binding microtubule motor family protein [Source:TAIR_LOCUS;Acc:AT1G18550]	F25I16.11	6381503	6384340	-1	1	UniProtKB Gene Name
AT1G18560	2.16096	2.42703	2.55697	2.38165	1.58014	1.9463	2.14023	1.88889	2.37478	2.60141	2.55258	2.50959	-0.492766	0.189563	0.127937	0.84903	BED zinc finger ;hAT family dimerisation domain [Source:TAIR_LOCUS;Acc:AT1G18560]	F25I16.10	6385449	6388080	1	1	UniProtKB Gene Name
AT1G18570	4.4787	3.85035	4.4233	4.25079	5.26759	4.06957	4.27394	4.53703	6.6652	5.2654	5.93637	5.95566	0.286245	0.823918	1.70487	0.0166659	myb domain protein 51 [Source:TAIR_LOCUS;Acc:AT1G18570]	MYB51	6389411	6391267	1	1	TAIR Gene Name
AT1G18580	3.69252	4.21138	4.24591	4.04994	4.00262	4.31794	4.11842	4.14632	4.03366	4.17442	4.28388	4.16398	0.0963889	0.83193	0.114049	0.789066	galacturonosyltransferase 11 [Source:TAIR_LOCUS;Acc:AT1G18580]	GAUT11	6395864	6398239	1	1	TAIR Gene Name
AT1G18590	5.11612	4.83614	5.71027	5.22084	5.91584	6.67907	5.82985	6.14159	5.50356	6.34769	6.11298	5.98808	0.920745	0.0597983	0.767235	0.126	sulfotransferase 17 [Source:TAIR_LOCUS;Acc:AT1G18590]	SOT17	6398580	6399942	1	1	TAIR Gene Name
AT1G18600	3.77436	3.99034	2.9049	3.55654	2.82885	3.79269	4.06849	3.56334	3.84493	3.97152	4.08923	3.96856	0.00680461	0.996785	0.412024	0.656657	RHOMBOID-like protein 12 [Source:TAIR_LOCUS;Acc:AT1G18600]	ATRBL12	6400404	6402791	1	1	TAIR Gene Name
AT1G18610	2.71337	3.25991	1.77444	2.58257	1.79548	2.60382	2.48911	2.29614	2.5294	3.22318	2.33234	2.69497	-0.286432	0.784844	0.112402	0.933891	Galactose oxidase/kelch repeat superfamily protein [Source:TAIR_LOCUS;Acc:AT1G18610]	F25I16.5	6405645	6409297	1	1	UniProtKB Gene Name
AT1G18620	7.30678	3.70428	7.15996	6.05701	6.917	2.43858	6.72914	5.36157	6.57242	2.71802	6.22808	5.17284	-0.695435	0.566361	-0.884162	0.411395	unknown protein; BEST Arabidopsis thaliana protein match is: unknown protein (TAIR:AT1G74160.1); Has 1987 Blast hits to 1263 proteins in 207 species: Archae - 0; Bacteria - 172; Metazoa - 665; Fungi - 149; Plants - 271; Viruses - 6; Other Eukaryotes /.../ (source: NCBI BLink). [Source:TAIR_LOCUS;Acc:AT1G18620]	F26I16.4	6409978	6414451	1	2	UniProtKB Gene Name
AT1G18630	3.21201	3.72226	3.03986	3.32471	3.40267	3.86149	3.19934	3.48783	2.99419	3.61381	3.14725	3.25175	0.163122	0.808825	-0.0729627	0.930249	glycine-rich RNA-binding protein 6 [Source:TAIR_LOCUS;Acc:AT1G18630]	GR-RBP6	6414725	6416459	1	1	TAIR Gene Name
AT1G18640	4.48872	4.25824	4.32202	4.35633	3.91907	4.22195	4.12407	4.08836	4.39972	4.21001	4.48144	4.36372	-0.267969	0.357924	0.00738997	0.990594	3-phosphoserine phosphatase [Source:TAIR_LOCUS;Acc:AT1G18640]	PSP	6416357	6418690	-1	1	TAIR Gene Name
AT1G18650	3.76968	3.92981	4.05019	3.91656	3.63847	3.2983	2.85389	3.26356	2.9559	2.91896	2.13971	2.67152	-0.653001	0.463062	-1.24503	0.0834853	plasmodesmata callose-binding protein 3 [Source:TAIR_LOCUS;Acc:AT1G18650]	PDCB3	6418858	6420557	-1	1	TAIR Gene Name
AT1G18660	6.09688	6.35293	5.0442	5.83134	5.36772	6.15591	5.7687	5.76411	5.43361	6.02611	5.45215	5.63729	-0.0672262	0.951605	-0.194045	0.822664	zinc finger (C3HC4-type RING finger) family protein [Source:TAIR_LOCUS;Acc:AT1G18660]		6421117	6425880	1	4
AT1G18670	4.05813	3.3725	3.8702	3.76694	3.3613	4.28665	4.42196	4.0233	3.4794	3.06291	3.38444	3.30892	0.25636	0.751709	-0.458025	0.453981	Protein kinase superfamily protein [Source:TAIR_LOCUS;Acc:AT1G18670]	IBS1	6426898	6430696	-1	1	TAIR Gene Name
AT1G18680	2.2975	1.65881	3.45418	2.47016	2.90375	1.97161	2.37351	2.41629	2.50831	1.8723	2.71619	2.3656	-0.0538718	0.957445	-0.104563	0.908296	HNH endonuclease domain-containing protein [Source:TAIR_LOCUS;Acc:AT1G18680]	F6A14.21	6431938	6433464	-1	1	UniProtKB Gene Name
AT1G18690	3.21891	2.9011	3.15777	3.09259	2.36057	2.77126	3.21001	2.78061	2.97518	2.91896	3.23844	3.04419	-0.311979	0.561185	-0.0484006	0.958586	Galactosyl transferase GMA12/MNN10 family protein [Source:TAIR_LOCUS;Acc:AT1G18690]	GT4	6433574	6436922	1	1	UniProtKB Gene Name
AT1G18700	5.16424	5.28051	4.62582	5.02353	4.66115	4.99784	5.30679	4.98859	5.22912	5.25343	5.28809	5.25688	-0.0349343	0.977555	0.233355	0.790354	DNAJ heat shock N-terminal domain-containing protein [Source:TAIR_LOCUS;Acc:AT1G18700]	F6A14.19	6437477	6444076	1	4	UniProtKB Gene Name
AT1G18710	2.47501	4.97507	5.53241	4.3275	3.48206	5.06131	5.06204	4.53514	4.08906	5.03621	3.95327	4.35952	0.207637	0.921921	0.032017	0.989305	myb domain protein 47 [Source:TAIR_LOCUS;Acc:AT1G18710]	AtMYB47	6450594	6453114	1	1	TAIR Gene Name
AT1G18720	6.45619	7.10124	7.01044	6.85596	6.96325	7.40152	7.27128	7.21202	7.34403	7.45684	7.41617	7.40568	0.356059	0.361758	0.549721	0.107439	Protein of unknown function (DUF962) [Source:TAIR_LOCUS;Acc:AT1G18720]	F6A14.17	6457821	6459751	-1	1	UniProtKB Gene Name
AT1G18730	8.00329	6.85171	8.34152	7.73217	7.34743	6.89686	6.95374	7.06601	6.70017	6.53091	6.42426	6.55178	-0.666162	0.728546	-1.18039	0.416896	NDH dependent flow 6 [Source:TAIR_LOCUS;Acc:AT1G18730]	NDF6	6460598	6462224	1	4	TAIR Gene Name
AT1G18735	2.38592	-4.97214	-1.8424	-1.47621	1.04075	-3.61031	-4.12736	-2.23231	-6.45573	-5.07781	-1.90399	-4.47917	-0.756098	0.897005	-3.00297	0.365088	other RNA [Source:TAIR_LOCUS;Acc:AT1G18735]		6461232	6461752	-1	1
AT1G18740	5.24246	4.35482	6.44511	5.34746	5.87946	4.9003	4.9025	5.22742	5.51134	4.63198	5.59717	5.24683	-0.120047	0.937119	-0.100637	0.948716	Protein of unknown function (DUF793) [Source:TAIR_LOCUS;Acc:AT1G18740]	F6A14.15	6463922	6465476	1	1	UniProtKB Gene Name
AT1G18745	3.06288	1.86851	3.28258	2.73799	2.67867	2.28579	2.14023	2.36823	2.22097	2.45465	2.78625	2.48729	-0.369759	0.69069	-0.250699	0.819174			6465487	6466454	-1	1
AT1G18750	2.69865	3.43658	1.75979	2.63167	0.659724	2.55455	2.52947	1.91458	2.06312	3.04321	2.4698	2.52538	-0.717095	0.555798	-0.106297	0.960165	AGAMOUS-like 65 [Source:TAIR_LOCUS;Acc:AT1G18750]	AGL65	6466761	6469984	1	2	TAIR Gene Name
AT1G18773	2.7661	0.706045	2.47804	1.9834	2.35299	0.97326	1.52769	1.61798	1.93408	0.860058	1.90758	1.56724	-0.365417	0.548397	-0.416155	0.465009	FUNCTIONS IN: molecular_function unknown; INVOLVED IN: biological_process unknown; LOCATED IN: endomembrane system; BEST Arabidopsis thaliana protein match is: carboxylesterases (TAIR:AT4G22300.1); Has 30201 Blast hits to 17322 proteins in 780 speci /.../chae - 12; Bacteria - 1396; Metazoa - 17338; Fungi - 3422; Plants - 5037; Viruses - 0; Other Eukaryotes - 2996 (source: NCBI BLink). [Source:TAI…		6474802	6475904	1	1
AT1G18800	5.32387	5.5404	5.6319	5.49872	6.24195	5.65043	4.9264	5.60626	4.86984	5.28836	4.58151	4.91324	0.107536	0.949045	-0.585488	0.546573	NAP1-related protein 2 [Source:TAIR_LOCUS;Acc:AT1G18800]	NRP2	6481113	6483596	-1	1	TAIR Gene Name
AT1G18810	4.44087	2.06567	4.47259	3.65971	4.21311	1.74563	4.20984	3.38952	3.84285	1.28932	3.34931	2.82716	-0.270183	0.812052	-0.832549	0.222904	phytochrome kinase substrate-related [Source:TAIR_LOCUS;Acc:AT1G18810]	PKS3	6485596	6487030	-1	1	UniProtKB Gene Name
AT1G18840	4.93953	4.3505	4.52026	4.60343	3.99769	3.94838	4.1297	4.02526	3.74587	3.47644	3.75026	3.65752	-0.578177	0.3518	-0.945909	0.080052	IQ-domain 30 [Source:TAIR_LOCUS;Acc:AT1G18840]	IQD30	6500848	6504413	-1	2	TAIR Gene Name
AT1G18850	3.41778	3.63242	3.08817	3.37946	4.00753	3.72535	3.11854	3.61714	3.52177	3.66613	3.20737	3.46509	0.237684	0.798952	0.0856338	0.943875	unknown protein; FUNCTIONS IN: molecular_function unknown; INVOLVED IN: biological_process unknown; LOCATED IN: nucleolus; EXPRESSED IN: 22 plant structures; EXPRESSED DURING: 13 growth stages; Has 40 Blast hits to 40 proteins in 13 species: Archae /.../acteria - 0; Metazoa - 0; Fungi - 0; Plants - 40; Viruses - 0; Other Eukaryotes - 0 (source: NCBI BLink). [Source:TAIR_LOCUS;Acc:AT1G18850]	F6A14.6	6504806	6506424	-1	1	UniProtKB Gene Name
AT1G18860	-6.49411	-2.86833	-5.99094	-5.11779	0.424103	1.23336	1.02904	0.895501	2.3864	1.96643	2.59526	2.31603	6.01329	0.00261181	7.43382	0.000593275	WRKY DNA-binding protein 61 [Source:TAIR_LOCUS;Acc:AT1G18860]	WRKY61	6509492	6511227	1	1	TAIR Gene Name
AT1G18870	4.98473	5.23534	6.06421	5.42809	3.60979	4.36599	4.38479	4.12019	3.21428	3.38043	2.5339	3.04287	-1.3079	0.0173792	-2.38522	0.000305069	isochorismate synthase 2 [Source:TAIR_LOCUS;Acc:AT1G18870]	ICS2	6515429	6519282	1	2	TAIR Gene Name
AT1G18880	2.45763	2.16819	2.31624	2.31402	2.99473	2.60919	1.95786	2.5206	2.70635	2.37258	2.7217	2.60021	0.206577	0.817207	0.286191	0.71266	Major facilitator superfamily protein [Source:TAIR_LOCUS;Acc:AT1G18880]		6520748	6523368	1	1
AT1G18890	4.73347	4.95252	5.46251	5.0495	6.07877	5.52057	5.68333	5.76089	5.58811	5.58078	5.837	5.66863	0.711391	0.194757	0.619134	0.281235	calcium-dependent protein kinase 1 [Source:TAIR_LOCUS;Acc:AT1G18890]	ATCDPK1	6522764	6525962	-1	1	TAIR Gene Name
AT1G18900	3.75552	4.27353	2.47804	3.50236	2.67867	3.93992	3.74812	3.45557	3.93364	4.22022	4.10404	4.08597	-0.0467919	0.977123	0.583606	0.495192	Pentatricopeptide repeat (PPR) superfamily protein [Source:TAIR_LOCUS;Acc:AT1G18900]		6528984	6532614	1	3
AT1G18910	3.2394	3.25991	1.65298	2.71743	1.80657	2.7808	2.62833	2.40523	2.56557	3.17876	2.72719	2.82384	-0.312195	0.818851	0.106411	0.951612	zinc ion binding;zinc ion binding [Source:TAIR_LOCUS;Acc:AT1G18910]	AT1G18910	6532559	6538145	-1	1	UniProtKB Gene Name
AT1G18940	1.15733	-0.432518	-1.53299	-0.269395	0.683707	0.130217	0.894094	0.569339	0.621452	-0.251859	0.915145	0.428246	0.838734	0.267671	0.69764	0.393785	Nodulin-like / Major Facilitator Superfamily protein [Source:TAIR_LOCUS;Acc:AT1G18940]		6543852	6545592	1	1
AT1G18950	5.14717	5.297	4.53582	4.99333	4.91408	4.84159	4.99067	4.91545	4.96209	5.12631	4.87558	4.98799	-0.0778836	0.917086	-0.00533703	0.995168	DDT domain superfamily [Source:TAIR_LOCUS;Acc:AT1G18950]		6546399	6551887	1	1
AT1G19000	8.03453	7.50039	7.93182	7.82225	7.98966	7.30762	8.28972	7.86233	7.96618	7.36924	7.89445	7.74329	0.0400853	0.958139	-0.0789584	0.908287	Homeodomain-like superfamily protein [Source:TAIR_LOCUS;Acc:AT1G19000]	AT1G19000	6560792	6562786	-1	2	UniProtKB Gene Name
AT1G19010	2.68377	2.0298	3.10588	2.60648	3.1259	2.86845	2.69066	2.895	2.86787	2.37785	2.86307	2.70293	0.28852	0.596107	0.0964487	0.906208	unknown protein; BEST Arabidopsis thaliana protein match is: unknown protein (TAIR:AT1G74860.1); Has 337 Blast hits to 320 proteins in 97 species: Archae - 0; Bacteria - 14; Metazoa - 153; Fungi - 26; Plants - 76; Viruses - 0; Other Eukaryotes - 68 /.../e: NCBI BLink). [Source:TAIR_LOCUS;Acc:AT1G19010]		6565494	6567525	1	2
AT1G19020	1.82372	1.82728	4.97545	2.87548	5.53405	3.71547	2.30873	3.85275	5.14805	3.7911	3.81346	4.25087	0.977268	0.6917	1.37539	0.507837	unknown protein; BEST Arabidopsis thaliana protein match is: unknown protein (TAIR:AT3G48180.1); Has 88 Blast hits to 88 proteins in 15 species: Archae - 0; Bacteria - 0; Metazoa - 0; Fungi - 0; Plants - 88; Viruses - 0; Other Eukaryotes - 0 (source /.../ BLink). [Source:TAIR_LOCUS;Acc:AT1G19020]	AT1G19020	6568073	6568597	1	1	UniProtKB Gene Name
AT1G19025	2.10995	1.61098	1.63706	1.786	1.11346	1.45345	1.18168	1.24953	1.34191	1.4884	1.75438	1.52823	-0.536466	0.418119	-0.25777	0.783939	DNA repair metallo-beta-lactamase family protein [Source:TAIR_LOCUS;Acc:AT1G19025]		6568853	6570939	1	1
AT1G19050	5.28086	4.61077	7.11243	5.66802	6.13883	2.96367	5.54779	4.88343	4.84426	2.49883	5.39151	4.24487	-0.784587	0.641654	-1.42315	0.263126	response regulator 7 [Source:TAIR_LOCUS;Acc:AT1G19050]	ARR7	6577833	6579178	-1	1	TAIR Gene Name
AT1G19080	2.82603	2.54842	3.0151	2.79652	2.48376	2.48024	2.49495	2.48632	2.39218	2.49398	2.17232	2.35283	-0.310199	0.386978	-0.44369	0.159296	GINS complex protein [Source:TAIR_LOCUS;Acc:AT1G19080]	TTN10	6584241	6586517	1	2	TAIR Gene Name
AT1G19100	3.83396	3.41461	2.63995	3.29618	2.70877	3.02515	3.07637	2.93677	3.13096	3.25775	3.20737	3.19869	-0.359411	0.63942	-0.0974828	0.933682	Histidine kinase-, DNA gyrase B-, and HSP90-like ATPase family protein [Source:TAIR_LOCUS;Acc:AT1G19100]		6594930	6601355	1	1
AT1G19110	5.85938	5.71542	5.5656	5.71347	5.42839	5.37074	5.61616	5.47176	5.47267	5.40623	5.47831	5.4524	-0.241706	0.425599	-0.261067	0.372766	inter-alpha-trypsin inhibitor heavy chain-related [Source:TAIR_LOCUS;Acc:AT1G19110]		6602126	6605908	1	1
AT1G19120	4.89286	4.12633	5.59592	4.87171	5.34627	4.20266	4.18662	4.57852	4.29896	4.02417	4.31693	4.21335	-0.293187	0.787928	-0.658353	0.375634	Small nuclear ribonucleoprotein family protein [Source:TAIR_LOCUS;Acc:AT1G19120]		6608115	6609369	1	1
AT1G19130	4.93953	5.01734	5.70829	5.22172	5.26655	5.19018	5.13751	5.19808	5.41089	5.57965	5.82432	5.60496	-0.0236417	0.977742	0.383236	0.336416	CONTAINS InterPro DOMAIN/s: Protein of unknown function DUF985 (InterPro:IPR009327), RmlC-like jelly roll fold (InterPro:IPR014710); Has 1465 Blast hits to 1465 proteins in 584 species: Archae - 10; Bacteria - 1038; Metazoa - 19; Fungi - 43; Plants /.../Viruses - 0; Other Eukaryotes - 304 (source: NCBI BLink). [Source:TAIR_LOCUS;Acc:AT1G19130]	AT1G19130/F14D16_18	6609325	6610613	-1	1	UniProtKB Gene Name
AT1G19140	3.09696	4.42629	3.43086	3.65137	3.89278	4.66749	3.43899	3.99975	3.14802	4.35477	3.22687	3.57655	0.348382	0.626802	-0.0748193	0.948164	FUNCTIONS IN: molecular_function unknown; INVOLVED IN: ubiquinone biosynthetic process; LOCATED IN: mitochondrion; EXPRESSED IN: 24 plant structures; EXPRESSED DURING: 15 growth stages; CONTAINS InterPro DOMAIN/s: COQ9 (InterPro:IPR013718), Ubiquino /.../synthesis protein COQ9 (InterPro:IPR012762); Has 35333 Blast hits to 34131 proteins in 2444 species: Archae - 798; Bacteria - 22429; Metazoa - 9…	T29M8.1	6610721	6612516	-1	2	UniProtKB Gene Name
AT1G19150	6.81162	5.30887	7.29528	6.47192	6.6269	5.31332	6.44127	6.12716	6.00851	4.77516	5.29731	5.36032	-0.344763	0.919205	-1.1116	0.622125	photosystem I light harvesting complex gene 6 [Source:TAIR_LOCUS;Acc:AT1G19150]	LHCA6	6612749	6613972	1	1	TAIR Gene Name
AT1G19170	3.54669	3.55174	3.63663	3.57835	3.52019	3.66757	3.91175	3.69984	3.75698	3.7911	3.88384	3.81064	0.121488	0.778862	0.232288	0.464109	Pectin lyase-like superfamily protein [Source:TAIR_LOCUS;Acc:AT1G19170]		6616643	6618986	1	1
AT1G19180	5.82985	2.94399	6.6492	5.14101	6.11347	6.90735	6.42841	6.48308	6.89814	5.08157	6.1244	6.0347	1.34207	0.322702	0.893693	0.587917	jasmonate-zim-domain protein 1 [Source:TAIR_LOCUS;Acc:AT1G19180]	TIFY10A	6622094	6623620	1	2	TAIR Gene Name
AT1G19200	1.05317	-0.243463	1.65298	0.820893	0.479841	2.52642	1.99952	1.66859	1.26781	0.890074	2.2042	1.45403	0.8477	0.485898	0.633134	0.653631	Protein of unknown function (DUF581) [Source:TAIR_LOCUS;Acc:AT1G19200]	T29M8.7	6625020	6625856	-1	1	UniProtKB Gene Name
AT1G19220	3.85846	3.39511	2.87772	3.3771	2.94489	2.13728	4.21338	3.09851	3.91989	3.30809	4.29682	3.8416	-0.278581	0.868398	0.464506	0.73776	auxin response factor 19 [Source:TAIR_LOCUS;Acc:AT1G19220]	ARF19	6628068	6633087	-1	1	TAIR Gene Name
AT1G19240	2.3297	3.14108	4.02848	3.16642	4.12302	3.55565	2.72581	3.46816	3.35299	3.33531	2.82261	3.1703	0.301741	0.86173	0.00388502	0.998638	unknown protein; Has 24 Blast hits to 24 proteins in 11 species: Archae - 0; Bacteria - 0; Metazoa - 0; Fungi - 0; Plants - 24; Viruses - 0; Other Eukaryotes - 0 (source: NCBI BLink). [Source:TAIR_LOCUS;Acc:AT1G19240]	T29M8.11	6649243	6650420	-1	1	UniProtKB Gene Name
AT1G19250	-1.28439	-2.48344	-2.47982	-2.08255	2.99473	2.44461	1.64785	2.3624	2.99796	2.43457	2.42317	2.61857	4.44495	0.0817805	4.70112	0.0641958	flavin-dependent monooxygenase 1 [Source:TAIR_LOCUS;Acc:AT1G19250]	FMO1	6650529	6653078	-1	1	TAIR Gene Name
AT1G19270	5.45157	4.82168	4.73396	5.0024	5.22766	4.9619	5.34113	5.1769	5.52357	4.94708	5.00164	5.15743	0.174495	0.817666	0.155025	0.843741	DA1 [Source:TAIR_LOCUS;Acc:AT1G19270]	DA1	6662501	6666028	1	1	TAIR Gene Name
AT1G19290	3.3089	3.51609	1.27592	2.7003	1.31212	2.8322	3.09185	2.41206	2.6304	3.4191	3.02336	3.02429	-0.288245	0.911249	0.323985	0.897413	Pentatricopeptide repeat (PPR) superfamily protein [Source:TAIR_LOCUS;Acc:AT1G19290]		6666249	6668963	1	1
AT1G19300	1.50065	3.66764	3.5612	2.90983	3.29895	4.15053	3.26224	3.57057	3.61274	3.58918	3.26885	3.49026	0.660743	0.627698	0.580426	0.689133	Nucleotide-diphospho-sugar transferases superfamily protein [Source:TAIR_LOCUS;Acc:AT1G19300]	GATL1	6671137	6672653	-1	1	TAIR Gene Name
AT1G19310	4.59855	4.45873	5.1641	4.74046	4.81442	4.69905	4.69677	4.73675	5.02711	4.66221	4.8432	4.84417	-0.00371322	0.996725	0.103713	0.874697	RING/U-box superfamily protein [Source:TAIR_LOCUS;Acc:AT1G19310]		6676234	6677673	-1	1
AT1G19330	5.16067	3.98478	4.11642	4.42062	4.67985	4.20089	4.0821	4.32095	4.23078	3.94181	3.79531	3.9893	-0.0996707	0.88476	-0.431321	0.245841	unknown protein; BEST Arabidopsis thaliana protein match is: unknown protein (TAIR:AT1G75060.1); Has 145 Blast hits to 145 proteins in 43 species: Archae - 0; Bacteria - 0; Metazoa - 40; Fungi - 0; Plants - 104; Viruses - 0; Other Eukaryotes - 1 (so /.../NCBI BLink). [Source:TAIR_LOCUS;Acc:AT1G19330]		6680563	6683533	-1	3
AT1G19340	3.42972	2.50735	1.77444	2.5705	2.86142	2.50352	2.37351	2.57948	2.50831	2.79081	2.09788	2.46567	0.00898189	0.994573	-0.104834	0.927492	Methyltransferase MT-A70 family protein [Source:TAIR_LOCUS;Acc:AT1G19340]		6684751	6687116	1	1
AT1G19350	6.55452	6.48644	5.97435	6.33844	6.58833	5.73293	6.33257	6.21794	6.61629	5.88354	5.79863	6.09949	-0.120493	0.877342	-0.23895	0.692295	Brassinosteroid signalling positive regulator (BZR1) family protein [Source:TAIR_LOCUS;Acc:AT1G19350]	BES1/BZR2	6688522	6690414	1	5	TAIR Gene Name
AT1G19360	5.02168	4.27809	4.44463	4.58146	4.42869	4.55189	4.91341	4.63133	4.87389	4.67497	5.2751	4.94132	0.0498658	0.954947	0.359853	0.439946	Nucleotide-diphospho-sugar transferase family protein [Source:TAIR_LOCUS;Acc:AT1G19360]		6690456	6692477	-1	1
AT1G19370	5.03931	5.16602	4.99335	5.06623	4.9154	4.94517	5.31257	5.05771	5.06652	5.02961	5.23538	5.1105	-0.00851414	0.990749	0.0442748	0.948128	unknown protein; LOCATED IN: endoplasmic reticulum; EXPRESSED IN: 22 plant structures; EXPRESSED DURING: 13 growth stages; BEST Arabidopsis thaliana protein match is: unknown protein (TAIR:AT1G75140.1); Has 45 Blast hits to 43 proteins in 15 species /.../ae - 0; Bacteria - 0; Metazoa - 0; Fungi - 0; Plants - 44; Viruses - 0; Other Eukaryotes - 1 (source: NCBI BLink). [Source:TAIR_LOCUS;Acc:AT1G19…		6692764	6694934	-1	1
AT1G19380	2.49787	0.777352	3.38308	2.21943	3.6001	2.66699	1.73922	2.66877	3.88189	1.5646	3.24227	2.89626	0.449338	0.751711	0.676823	0.563107	Protein of unknown function (DUF1195) [Source:TAIR_LOCUS;Acc:AT1G19380]		6698058	6698824	1	1
AT1G19394	0.604281	0.742142	-5.99094	-1.54817	-2.60382	-0.287438	0.745197	-0.715355	0.180972	0.312677	1.02659	0.506746	0.832819	0.872067	2.05492	0.563971	unknown protein; Has 35333 Blast hits to 34131 proteins in 2444 species: Archae - 798; Bacteria - 22429; Metazoa - 974; Fungi - 991; Plants - 531; Viruses - 0; Other Eukaryotes - 9610 (source: NCBI BLink). [Source:TAIR_LOCUS;Acc:AT1G19394]		6709773	6710670	1	1
AT1G19396	1.34549	0.794638	-0.785015	0.451704	-1.64718	-0.208828	0.764672	-0.363779	-0.154316	0.575827	1.14655	0.522688	-0.815483	0.748218	0.0709843	0.984926	unknown protein. [Source:TAIR_LOCUS;Acc:AT1G19396]		6709778	6711788	1	3
AT1G19397	1.46629	2.3302	2.02798	1.94149	1.35784	2.23798	1.6583	1.75137	1.73855	2.45963	2.23539	2.14452	-0.190122	0.925424	0.203029	0.919255	unknown protein; Has 30201 Blast hits to 17322 proteins in 780 species: Archae - 12; Bacteria - 1396; Metazoa - 17338; Fungi - 3422; Plants - 5037; Viruses - 0; Other Eukaryotes - 2996 (source: NCBI BLink). [Source:TAIR_LOCUS;Acc:AT1G19397]		6710961	6711787	1	1
AT1G19400	7.5845	6.50999	6.9895	7.028	7.07527	6.0591	7.07224	6.73554	6.94693	5.99652	6.68598	6.54314	-0.292457	0.595615	-0.484852	0.265413	Erythronate-4-phosphate dehydrogenase family protein [Source:TAIR_LOCUS;Acc:AT1G19400]	AT1G19400	6712038	6714252	-1	2	UniProtKB Gene Name
AT1G19430	5.11704	4.80183	4.45634	4.79174	4.57221	4.46636	5.04527	4.69462	4.63327	4.68762	4.87188	4.73092	-0.0971195	0.895567	-0.0608123	0.940584	S-adenosyl-L-methionine-dependent methyltransferases superfamily protein [Source:TAIR_LOCUS;Acc:AT1G19430]		6724573	6728040	-1	1
AT1G19440	3.61623	2.95165	4.08067	3.54952	3.4501	3.21642	3.71604	3.46085	3.00548	2.96508	3.69259	3.22105	-0.0886615	0.923986	-0.328465	0.574175	3-ketoacyl-CoA synthase 4 [Source:TAIR_LOCUS;Acc:AT1G19440]	KCS4	6728984	6730931	1	1	TAIR Gene Name
AT1G19450	6.11455	2.27004	4.3797	4.25476	4.67209	2.67725	5.59869	4.31601	4.644	2.17479	4.74955	3.85611	0.0612498	0.97161	-0.39865	0.726054	Major facilitator superfamily protein [Source:TAIR_LOCUS;Acc:AT1G19450]		6731434	6734882	-1	1
AT1G19480	2.44003	3.25373	2.86394	2.85257	2.84522	2.92977	2.8264	2.86713	2.86787	3.13292	2.73266	2.91115	0.0145645	0.986139	0.0585829	0.939908	DNA glycosylase superfamily protein [Source:TAIR_LOCUS;Acc:AT1G19480]		6744353	6746408	1	2
AT1G19485	4.86566	4.70947	4.70077	4.75864	4.45241	4.24441	4.59739	4.4314	4.49909	4.71465	4.52765	4.58046	-0.327235	0.347782	-0.178172	0.703607	Transducin/WD40 repeat-like superfamily protein [Source:TAIR_LOCUS;Acc:AT1G19485]		6746778	6751507	1	2
AT1G19490	0.725423	2.36513	-2.47982	0.203577	-0.493728	1.71595	1.16713	0.79645	0.518071	1.87976	1.25728	1.21837	0.592873	0.785223	1.01479	0.54878	Basic-leucine zipper (bZIP) transcription factor family protein [Source:TAIR_LOCUS;Acc:AT1G19490]		6751673	6753999	-1	1
AT1G19510	1.35804	0.0444478	2.39461	1.2657	1.50068	0.273763	0.91167	0.895372	1.31763	0.398909	1.75438	1.15697	-0.370326	0.733371	-0.108726	0.944034	RAD-like 5 [Source:TAIR_LOCUS;Acc:AT1G19510]	ATRL5	6756284	6757377	-1	1	TAIR Gene Name
AT1G19520	4.44381	4.64639	3.90121	4.33047	4.59865	4.64691	4.29413	4.51323	4.45366	4.66114	4.46516	4.52665	0.18276	0.657266	0.196183	0.622188	pentatricopeptide (PPR) repeat-containing protein [Source:TAIR_LOCUS;Acc:AT1G19520]	NFD5	6759965	6762778	1	2	TAIR Gene Name
AT1G19570	8.06283	8.47887	9.79434	8.77868	8.27657	9.4005	8.65949	8.77885	8.2135	8.46863	8.39526	8.35913	0.000170097	0.999908	-0.419548	0.781282	dehydroascorbate reductase [Source:TAIR_LOCUS;Acc:AT1G19570]	DHAR1	6773302	6774528	-1	2	TAIR Gene Name
AT1G19580	4.6969	4.83921	5.1188	4.88497	4.46502	4.89268	4.67384	4.67718	4.37267	4.659	4.55098	4.52755	-0.20779	0.694251	-0.357418	0.377548	gamma carbonic anhydrase 1 [Source:TAIR_LOCUS;Acc:AT1G19580]	GAMMA CA1	6774760	6777456	1	2	TAIR Gene Name
AT1G19600	4.75141	4.29016	5.6537	4.89843	5.76381	4.57113	5.05811	5.13102	5.06916	4.51613	5.06129	4.88219	0.232593	0.749559	-0.0162311	0.988138	pfkB-like carbohydrate kinase family protein [Source:TAIR_LOCUS;Acc:AT1G19600]	F14P1.7	6778988	6781173	1	1	UniProtKB Gene Name
AT1G19610	0.220475	-3.39592	-1.8424	-1.67262	5.24355	2.20992	3.45403	3.63584	3.78763	2.11918	3.42213	3.10965	5.30845	0.00854312	4.78226	0.0159355	Arabidopsis defensin-like protein [Source:TAIR_LOCUS;Acc:AT1G19610]	LCR78	6781483	6782039	-1	1	TAIR Gene Name
AT1G19630	1.12833	3.41184	0.514222	1.6848	0.242892	3.21993	-0.475896	0.995641	0.0679602	2.89716	-1.16903	0.598696	-0.689156	0.761916	-1.0861	0.554149	cytochrome P450, family 722, subfamily A, polypeptide 1 [Source:TAIR_LOCUS;Acc:AT1G19630]	CYP722A1	6785427	6787967	-1	1	TAIR Gene Name
AT1G19640	2.04935	0.234218	3.79885	2.02747	1.28083	1.74563	1.68918	1.57188	1.60491	-0.251859	1.94582	1.09962	-0.455595	0.88299	-0.92785	0.695876	jasmonic acid carboxyl methyltransferase [Source:TAIR_LOCUS;Acc:AT1G19640]	JMT	6788885	6791846	-1	1	TAIR Gene Name
AT1G19650	5.95024	5.42726	5.27359	5.55036	5.13534	5.10243	5.79842	5.3454	5.33758	5.29043	5.41625	5.34809	-0.204968	0.810007	-0.202278	0.813376	Sec14p-like phosphatidylinositol transfer family protein [Source:TAIR_LOCUS;Acc:AT1G19650]	F14P1.2	6796202	6799764	-1	2	UniProtKB Gene Name
AT1G19660	7.72297	7.91649	8.36613	8.00186	7.94646	7.79097	8.24021	7.99255	8.08768	7.93522	8.22317	8.08202	-0.00931801	0.992198	0.0801561	0.923742	Wound-responsive family protein [Source:TAIR_LOCUS;Acc:AT1G19660]	BBD2	6799981	6802685	-1	2	UniProtKB Gene Name
AT1G19670	5.76713	5.29028	9.16529	6.7409	6.19653	7.66259	6.76418	6.87443	6.66893	6.81491	7.08622	6.85669	0.133532	0.969846	0.115788	0.974123	chlorophyllase 1 [Source:TAIR_LOCUS;Acc:AT1G19670]	ATCLH1	6803611	6805044	-1	1	TAIR Gene Name
[truncated: 16,194 more rows]
